# Supplementary material for: Differential regulation of cranial and cardiac neural crest by serum response factor and its cofactors
Source: eLife. 2022 Jan 19;11:e75106. doi: 10.7554/eLife.75106 (PMC8806183; doi:10.7554/eLife.75106)
Supplement: Supplementary file 1. — A Microsoft Excel file containing gene expression analysis for the mandible, FNP, and joint mandible+ FNP datasets, FNP vs mandible dataset, gene lists used to generate Figure 1G–H, raw counts and TPM values for each sample, the variables used for each sample to classify it for analysis in Sleuth (genotype, tissue, and litter) and the Enrichr results used for Figure 1F and Figure 1—figure supplement 2G-H. [file elife-75106-supp1.xlsx]

## Sheet: Joint Model WT
ens_gene	target_id	pval	qval	b	se_b	mean_obs	var_obs	tech_var	sigma_sq	smooth_sigma_sq	final_sigma_sq	Fold Change	-LOG(P value)	-LOG(Q value)	Linear FC
ENSMUSG00000062825	Actg1	1.35139e-276	2.08803e-272	-0.985723	0.0277385	9.48505	0.247658	4.26486e-05	0.00151351	0.00282986	0.00282986	0.504973	275.869	271.68	0.504973
ENSMUSG00000029580	Actb	7.85462e-120	6.06809e-116	-0.657743	0.0282591	9.50432	0.112608	0.00013211	0.00129756	0.00284924	0.00284924	0.633869	119.105	115.217	0.633869
ENSMUSG00000021823	Vcl	5.75468e-109	2.96385e-105	-0.717634	0.0323597	7.19698	0.153852	0.00108036	0.002829	0.00231669	0.002829	0.608094	108.24	104.528	0.608094
ENSMUSG00000004665	Cnn2	1.04843e-104	4.04983e-101	-1.43935	0.0662351	7.05743	0.547162	0.000950794	0.0154277	0.00238313	0.0154277	0.368735	103.979	100.393	0.368735
ENSMUSG00000023022	Lima1	7.72652e-87	2.38765e-83	-0.549848	0.0278377	7.0966	0.0962423	0.000467738	0.00242537	0.00236325	0.00242537	0.683092	86.112	82.622	0.683092
ENSMUSG00000005103	Wdr1	1.67518e-82	4.31388e-79	-0.624469	0.0324549	6.20479	0.1035	0.00079492	0.00128551	0.00313747	0.00313747	0.648659	81.7759	78.3651	0.648659
ENSMUSG00000031799	Tpm4	5.44321e-47	1.20147e-43	-0.378338	0.0262798	9.03475	0.0372113	0.00011123	0.00179889	0.00246712	0.00246712	0.769323	46.2641	42.9203	0.769323
ENSMUSG00000008136	Fhl2	4.21335e-46	8.13755e-43	-1.36966	0.0960873	4.18008	0.53943	0.0215976	0.00939853	0.0128714	0.0128714	0.386982	45.3754	42.0895	0.386982
ENSMUSG00000015605	Srf	2.25214e-42	3.86642e-39	-1.42528	0.104477	4.67555	0.546375	0.00729458	0.0334566	0.0084712	0.0334566	0.372347	41.6474	38.4127	0.372347
ENSMUSG00000039568	Ubald1	9.77306e-35	1.51004e-31	-0.551989	0.0448996	6.74364	0.0830872	0.00245782	0.00506849	0.0025853	0.00506849	0.682079	34.01	30.821	0.682079
ENSMUSG00000116811	Gm16385	2.65424e-27	3.72824e-24	-0.7999	0.0739017	4.71454	0.178647	0.0100364	0.010353	0.00820447	0.010353	0.574389	26.5761	23.4285	0.574389
ENSMUSG00000031328	Flna	1.49236e-26	1.92153e-23	-0.45896	0.0430364	7.48393	0.0601815	0.000469333	0.00644528	0.00221539	0.00644528	0.72751	25.8261	22.7164	0.72751
ENSMUSG00000043889	Gm8399	1.5682e-20	1.86387e-17	-0.756271	0.0814222	4.71225	0.168156	0.011155	0.0135954	0.00821987	0.0135954	0.592024	19.8046	16.7296	0.592024
ENSMUSG00000034926	Dhcr24	1.47862e-16	1.63186e-13	-0.212532	0.0257358	8.20546	0.0218462	0.000283775	0.00218892	0.00216411	0.00218892	0.863022	15.8301	12.7873	0.863022
ENSMUSG00000032643	Fhl3	2.80691e-15	2.8913e-12	-0.402336	0.0509337	5.95023	0.0581028	0.00195769	0.00772747	0.00354435	0.00772747	0.756632	14.5518	11.5389	0.756632
ENSMUSG00000032193	Ldlr	3.25798e-14	3.14619e-11	-0.267094	0.0352012	6.64226	0.0388802	0.00117596	0.0034501	0.00267047	0.0034501	0.830992	13.4871	10.5022	0.830992
ENSMUSG00000015745	Plekho1	8.68564e-14	7.89422e-11	-0.252567	0.0338585	6.81269	0.0215161	0.00174646	0.00163062	0.00253341	0.00253341	0.839402	13.0612	10.1027	0.839402
ENSMUSG00000021493	Pdlim7	1.91294e-13	1.64204e-10	-0.418962	0.0569648	6.57625	0.060864	0.00198922	0.0101254	0.0027311	0.0101254	0.747963	12.7183	9.78462	0.747963
ENSMUSG00000091491	Vmn2r97	3.98316e-13	3.23915e-10	-0.347029	0.0478256	8.50102	0.0475733	0.000199951	0.00833927	0.00222493	0.00833927	0.786201	12.3998	9.48957	0.786201
ENSMUSG00000027533	Fabp5	8.27881e-13	6.3958e-10	-0.210545	0.0294203	8.64178	0.0267071	0.000480505	0.0027509	0.00227147	0.0027509	0.864211	12.082	9.19411	0.864211
ENSMUSG00000016756	Cmah	1.29972e-12	9.56282e-10	-0.306168	0.0431566	6.85863	0.0410742	0.000249061	0.00670424	0.0025014	0.00670424	0.808787	11.8862	9.01941	0.808787
ENSMUSG00000020255	D10Wsu102e	1.95983e-12	1.37642e-09	-0.210236	0.0298744	9.86445	0.0186629	5.19448e-05	0.00296957	0.00327998	0.00327998	0.864396	11.7078	8.86125	0.864396
ENSMUSG00000001473	Tubb6	2.53005e-12	1.69964e-09	-0.31325	0.0447396	6.20209	0.0588064	0.00163362	0.00583914	0.00314115	0.00583914	0.804827	11.5969	8.76964	0.804827
ENSMUSG00000056201	Cfl1	8.12939e-12	5.23363e-09	-0.198597	0.0290506	9.05637	0.0143249	0.000116622	0.00303407	0.00248093	0.00303407	0.871398	11.0899	8.2812	0.871398
ENSMUSG00000031349	Nsdhl	2.2383e-11	1.38336e-08	-0.256012	0.0382704	5.9583	0.0343078	0.00193804	0.0023625	0.00352989	0.00352989	0.837399	10.6501	7.85907	0.837399
ENSMUSG00000015932	Dstn	9.78217e-11	5.81325e-08	-0.191891	0.0296573	8.31125	0.0179684	0.000228911	0.00305475	0.00218028	0.00305475	0.875458	10.0096	7.23558	0.875458
ENSMUSG00000024048	Myl12a	1.01775e-10	5.82415e-08	-0.199897	0.0309233	7.46024	0.0146214	0.000735428	0.00283458	0.00222193	0.00283458	0.870613	9.99236	7.23477	0.870613
ENSMUSG00000058258	Idi1	1.24711e-10	6.88182e-08	-0.230875	0.0358865	5.90369	0.0362377	0.00117795	0.00328953	0.00362998	0.00362998	0.852118	9.9041	7.1623	0.852118
ENSMUSG00000026278	Bok	3.32345e-09	1.77071e-06	-0.374303	0.0632828	4.84824	0.0931817	0.00490295	0.010048	0.00736533	0.010048	0.771478	8.47841	5.75185	0.771478
ENSMUSG00000005481	Ddx39	5.68404e-09	2.92747e-06	-0.159304	0.0273446	7.55163	0.0262523	0.000593067	0.0012925	0.00219845	0.00219845	0.895457	8.24534	5.53351	0.895457
ENSMUSG00000035722	Abca7	1.01227e-08	5.04534e-06	0.292094	0.0509881	5.38481	0.032143	0.0047429	0.00484109	0.00496298	0.00496298	1.22442	7.9947	5.29711	1.22442
ENSMUSG00000050912	Tmem123	1.06468e-08	5.14072e-06	-0.210514	0.0368026	7.46554	0.0173786	0.000619327	0.00443723	0.00222044	0.00443723	0.864229	7.97278	5.28898	0.864229
ENSMUSG00000047702	Olfr1388	1.33629e-08	6.25668e-06	-0.284102	0.050006	7.12721	0.0487267	0.000528387	0.00880717	0.0023484	0.00880717	0.821253	7.8741	5.20366	0.821253
ENSMUSG00000036781	Rps27l	2.27481e-08	9.76336e-06	-0.215551	0.0385623	7.04263	0.0233935	0.000841939	0.00470971	0.00239091	0.00470971	0.861217	7.64305	5.0104	0.861217
ENSMUSG00000045294	Insig1	2.24318e-08	9.76336e-06	-0.306201	0.0547559	6.62164	0.061398	0.00133496	0.00985834	0.0026892	0.00985834	0.808769	7.64914	5.0104	0.808769
ENSMUSG00000074978	Actg-ps1	2.1844e-08	9.76336e-06	-0.915242	0.163532	2.93902	0.292679	0.0609457	0.0130706	0.0388934	0.0388934	0.530255	7.66067	5.0104	0.530255
ENSMUSG00000117098	Gm49909	2.4963e-08	1.04244e-05	-0.221412	0.0397256	7.27072	0.0185343	0.00245537	0.00343629	0.00228613	0.00343629	0.857726	7.6027	4.98195	0.857726
ENSMUSG00000059743	Fdps	3.43148e-08	1.39526e-05	-0.245573	0.0445052	7.16924	0.0227855	0.000590661	0.00680399	0.00232896	0.00680399	0.84348	7.46452	4.85535	0.84348
ENSMUSG00000037071	Scd1	6.75904e-08	2.67779e-05	-0.253584	0.0469821	5.03338	0.0301774	0.00186035	0.00590593	0.0063803	0.0063803	0.83881	7.17011	4.57222	0.83881
ENSMUSG00000030315	Vgll4	8.06973e-08	3.11713e-05	0.165271	0.0308023	6.51281	0.0106741	0.000751035	0.00127154	0.00279107	0.00279107	1.12138	7.09314	4.50624	1.12138
ENSMUSG00000020917	Acly	9.42406e-08	3.55149e-05	-0.139718	0.0261767	7.95615	0.00906382	0.000408163	0.001608	0.00214999	0.00214999	0.907697	7.02576	4.44959	0.907697
ENSMUSG00000046447	Camk2n1	1.13912e-07	4.19061e-05	0.313042	0.0590311	5.41021	0.415487	0.00599785	0.00701159	0.00487891	0.00701159	1.24232	6.94343	4.37772	1.24232
ENSMUSG00000021957	Tkt	1.74405e-07	6.26681e-05	-0.13276	0.02541	8.22541	0.0155335	0.000243803	0.00156001	0.00216669	0.00216669	0.912085	6.75844	4.20295	0.912085
ENSMUSG00000043091	Tuba1c	1.87709e-07	6.59158e-05	-0.153521	0.0294603	8.27845	0.015157	0.000314741	0.00292545	0.00217461	0.00292545	0.899054	6.72651	4.18101	0.899054
ENSMUSG00000040327	Cul9	2.00862e-07	6.8967e-05	0.675182	0.129879	5.36614	0.177535	0.0193936	0.0435826	0.00502615	0.0435826	1.5968	6.6971	4.16136	1.5968
ENSMUSG00000000531	Grasp	2.24442e-07	7.53883e-05	0.241249	0.0465925	5.59176	0.0260379	0.00376768	0.00247061	0.00433686	0.00433686	1.18202	6.64889	4.1227	1.18202
ENSMUSG00000030782	Tgfb1i1	2.39782e-07	7.8827e-05	-0.44113	0.0853991	4.99117	0.109701	0.0102904	0.0169369	0.00658799	0.0169369	0.736557	6.62018	4.10333	0.736557
ENSMUSG00000040675	Mthfd1l	4.51392e-07	0.000145301	-0.184413	0.0365472	6.7821	0.0322447	0.00115241	0.00383419	0.00255583	0.00383419	0.880007	6.34545	3.83773	0.880007
ENSMUSG00000015217	Hmgb3	5.02931e-07	0.000158587	-0.132684	0.0264038	9.05206	0.0121097	0.000124585	0.0023446	0.00247815	0.00247815	0.912133	6.29849	3.79973	0.912133
ENSMUSG00000036752	Tubb4b	5.64506e-07	0.000174444	-0.154686	0.0309187	8.1326	0.0148069	0.000217143	0.00335179	0.00215651	0.00335179	0.898328	6.24833	3.75835	0.898328
ENSMUSG00000025577	Cbx2	6.71696e-07	0.000203498	-0.129554	0.0260704	7.88686	0.0128887	0.00029995	0.00223748	0.00215199	0.00223748	0.914114	6.17283	3.69144	0.914114
ENSMUSG00000028613	Lrp8	7.23045e-07	0.000214842	-0.347776	0.0701859	5.67994	0.0550741	0.00889772	0.00949292	0.0041088	0.00949292	0.785794	6.14083	3.66788	0.785794
ENSMUSG00000005732	Ranbp1	7.39744e-07	0.000215656	-0.142187	0.028721	8.31811	0.0163316	0.000158569	0.00292104	0.00218155	0.00292104	0.906145	6.13092	3.66624	0.906145
ENSMUSG00000060288	Ppih	8.03588e-07	0.00022993	-0.16129	0.0326862	6.64832	0.0184018	0.00132359	0.00194793	0.00266506	0.00266506	0.894225	6.09497	3.6384	0.894225
ENSMUSG00000079523	Tmsb10	1.01062e-06	0.000283911	-0.182629	0.0373508	9.27599	0.0222126	0.000115148	0.00509315	0.00264096	0.00509315	0.881096	5.99541	3.54682	0.881096
ENSMUSG00000029394	Cdk2ap1	1.16555e-06	0.000315947	-0.13038	0.0268194	8.00221	0.0129232	0.000439361	0.00224595	0.00215008	0.00224595	0.913591	5.93347	3.50039	0.913591
ENSMUSG00000093930	Hmgcs1	1.16217e-06	0.000315947	-0.192569	0.0396071	8.56146	0.0288754	0.000229186	0.00562739	0.00224348	0.00562739	0.875046	5.93473	3.50039	0.875046
ENSMUSG00000095677	Dynlt1f	1.31782e-06	0.000351062	-0.188916	0.0390561	8.33472	0.017893	0.00125973	0.00443502	0.00218471	0.00443502	0.877264	5.88014	3.45462	0.877264
ENSMUSG00000020163	Uqcr11	1.48232e-06	0.000388191	-0.171263	0.0355789	6.58676	0.0285008	0.00200454	0.00209537	0.00272134	0.00272134	0.888065	5.82906	3.41095	0.888065
ENSMUSG00000025132	Arhgdia	1.56714e-06	0.000396948	-0.125726	0.0261793	8.95499	0.00848227	0.000139573	0.00129679	0.00241909	0.00241909	0.916543	5.80489	3.40127	0.916543
ENSMUSG00000039183	Nubp2	1.54597e-06	0.000396948	-0.190238	0.0395901	6.14619	0.0178514	0.00263078	0.000687545	0.00322076	0.00322076	0.876461	5.8108	3.40127	0.876461
ENSMUSG00000066415	Msl2	1.69596e-06	0.000422649	0.129187	0.0269891	7.53317	0.00800016	0.00051659	0.00165958	0.00220281	0.00220281	1.09368	5.77059	3.37402	1.09368
ENSMUSG00000035478	Mbd3	2.47977e-06	0.000608172	-0.121272	0.0257489	7.98271	0.00978956	0.000325317	0.000958958	0.0021499	0.0021499	0.919377	5.60559	3.21597	0.919377
ENSMUSG00000019947	Arid5b	2.70525e-06	0.000653106	0.20428	0.0435377	6.3909	0.0415609	0.000885281	0.00619136	0.00291426	0.00619136	1.15211	5.56779	3.18502	1.15211
ENSMUSG00000048087	Gm4737	2.83685e-06	0.000664781	-0.145387	0.0310503	8.57683	0.0258869	0.000180994	0.0034184	0.00224854	0.0034184	0.904137	5.54716	3.17732	0.904137
ENSMUSG00000072692	Rpl37rt	2.83966e-06	0.000664781	0.223746	0.0477876	7.12999	0.0241916	0.00396848	0.00455716	0.00234708	0.00455716	1.16776	5.54673	3.17732	1.16776
ENSMUSG00000062933	Gm10123	3.17396e-06	0.000731953	-0.137834	0.0295829	8.42836	0.00954848	0.000484765	0.00278246	0.00220543	0.00278246	0.908883	5.4984	3.13552	0.908883
ENSMUSG00000044533	Rps2	3.2818e-06	0.000745692	-0.196197	0.0421716	9.86819	0.0378076	6.10559e-05	0.00657847	0.00328521	0.00657847	0.872848	5.48389	3.12744	0.872848
ENSMUSG00000029309	Sparcl1	3.53428e-06	0.000791423	0.270458	0.0583254	6.33673	0.209912	0.00127324	0.011427	0.00297389	0.011427	1.20619	5.4517	3.10159	1.20619
ENSMUSG00000006398	Cdc20	3.6713e-06	0.000810362	-0.126547	0.0273368	7.02725	0.0165325	0.000390771	0.00171074	0.00239915	0.00239915	0.916021	5.43518	3.09132	0.916021
ENSMUSG00000008892	Vdac3	3.98896e-06	0.00085602	-0.119845	0.0259858	7.96589	0.00913462	0.000371069	0.002006	0.00214991	0.00214991	0.920286	5.39914	3.06752	0.920286
ENSMUSG00000021767	Kat6b	3.9737e-06	0.00085602	0.14829	0.0321478	6.71942	0.0114763	0.000967664	0.00289067	0.00260464	0.00289067	1.10826	5.40081	3.06752	1.10826
ENSMUSG00000081344	Gm14303	4.31274e-06	0.000912824	3.70716	0.806655	1.6399	6.0595	1.51481	0.914443	0.103252	0.914443	13.0607	5.36525	3.03961	13.0607
ENSMUSG00000050428	Fbxo46	4.46443e-06	0.00093216	-0.200736	0.0437477	6.08081	0.0168167	0.00382244	0.00113951	0.00332265	0.00332265	0.870106	5.35023	3.03051	0.870106
ENSMUSG00000056612	Ppp1r14b	4.73592e-06	0.000975663	-0.164085	0.0358565	7.77408	0.0257169	0.00037975	0.00442015	0.00216078	0.00442015	0.892494	5.3246	3.0107	0.892494
ENSMUSG00000017221	Psmd3	5.52018e-06	0.00112227	-0.11679	0.0257022	8.20827	0.00839112	0.000301799	0.00155952	0.00216446	0.00216446	0.922237	5.25805	2.9499	0.922237
ENSMUSG00000076437	Selenoh	5.67316e-06	0.00113839	-0.157578	0.0347225	7.46604	0.0279101	0.000543299	0.00395781	0.0022203	0.00395781	0.896529	5.24617	2.94371	0.896529
ENSMUSG00000059195	Gm12715	6.70161e-06	0.00132752	-0.607541	0.134921	4.41795	0.148258	0.0574509	-0.00491562	0.0105092	0.0105092	0.656314	5.17382	2.87696	0.656314
ENSMUSG00000029070	Mxra8	6.96096e-06	0.00132783	0.423297	0.0941731	4.75643	0.0867419	0.0101628	0.0229465	0.00792925	0.0229465	1.34099	5.15733	2.87686	1.34099
ENSMUSG00000022351	Sqle	6.9601e-06	0.00132783	-0.206164	0.045866	7.84634	0.0251604	0.000407601	0.00744619	0.00215436	0.00744619	0.866839	5.15738	2.87686	0.866839
ENSMUSG00000045930	Clec14a	6.83315e-06	0.00132783	0.338022	0.0751356	4.96561	0.0608028	0.0077323	0.0133437	0.00671847	0.0133437	1.26402	5.16538	2.87686	1.26402
ENSMUSG00000117822	Eef1a1-ps1	7.08055e-06	0.00133417	0.272223	0.0606118	5.00732	0.0283387	0.00720805	0.00113596	0.00650742	0.00650742	1.20767	5.14993	2.87479	1.20767
ENSMUSG00000023832	Acat2	7.26966e-06	0.00133719	-0.133019	0.0296545	8.04923	0.00724422	0.000287277	0.00299578	0.00215135	0.00299578	0.911921	5.13849	2.87381	0.911921
ENSMUSG00000019849	Prep	7.26316e-06	0.00133719	-0.11757	0.0262093	7.92695	0.0114685	0.000328859	0.00223566	0.00215052	0.00223566	0.921739	5.13887	2.87381	0.921739
ENSMUSG00000035215	Lsm7	7.37859e-06	0.00134125	-0.192993	0.043055	7.08924	0.0250972	0.00279157	0.00412905	0.0023669	0.00412905	0.874789	5.13203	2.87249	0.874789
ENSMUSG00000078348	Sf3b5	7.79349e-06	0.0014002	-0.20253	0.0453009	6.6732	0.0298648	0.00128819	0.00637324	0.00264328	0.00637324	0.869025	5.10827	2.85381	0.869025
ENSMUSG00000020808	Pimreg	8.54189e-06	0.00151702	-0.146632	0.0329426	6.35916	0.0129577	0.0011027	0.00118293	0.00294876	0.00294876	0.903357	5.06845	2.81901	0.903357
ENSMUSG00000057863	Rpl36	8.88424e-06	0.00155989	-0.138669	0.0312128	8.09467	0.0164836	0.000305537	0.00333163	0.0021537	0.00333163	0.908357	5.05138	2.80691	0.908357
ENSMUSG00000018761	Mpdu1	9.18522e-06	0.00159462	0.211134	0.0476009	6.1281	0.0261302	0.00327748	0.00518166	0.00324807	0.00518166	1.1576	5.03691	2.79734	1.1576
ENSMUSG00000020649	Rrm2	1.01315e-05	0.00172025	-0.141132	0.0319713	7.57599	0.0240701	0.000199987	0.00361608	0.00219299	0.00361608	0.906807	4.99432	2.76441	0.906807
ENSMUSG00000016319	Slc25a5	1.0093e-05	0.00172025	-0.165821	0.0375571	8.17486	0.0317063	0.000192716	0.00507327	0.00216057	0.00507327	0.891421	4.99598	2.76441	0.891421
ENSMUSG00000023004	Tuba1b	1.03395e-05	0.00173648	-0.125893	0.0285475	9.63979	0.010526	4.70785e-05	0.00154651	0.00299544	0.00299544	0.916437	4.9855	2.76033	0.916437
ENSMUSG00000072235	Tuba1a	1.05263e-05	0.00174884	-0.155181	0.0352198	9.70936	0.0163989	7.13605e-05	0.0045596	0.00307769	0.0045596	0.89802	4.97772	2.75725	0.89802
ENSMUSG00000111619	Gm48348	1.07036e-05	0.00175938	-0.342416	0.0777786	5.67651	0.0712523	0.00350532	0.0190795	0.0041172	0.0190795	0.788719	4.97047	2.75464	0.788719
ENSMUSG00000052155	Acvr2a	1.21922e-05	0.00198296	0.167666	0.0383312	6.78186	0.0326206	0.00139601	0.00408932	0.002556	0.00408932	1.12324	4.91392	2.70269	1.12324
ENSMUSG00000090625	Gm20721	1.322e-05	0.00212773	0.412104	0.0945967	5.08784	0.0715965	0.0198903	0.0135175	0.00612575	0.0135175	1.33063	4.87877	2.67208	1.33063
ENSMUSG00000029404	Arl6ip4	1.34422e-05	0.00214118	-0.149233	0.0342845	6.29112	0.0136289	0.00136107	0.00284585	0.0030272	0.0030272	0.90173	4.87153	2.66935	0.90173
ENSMUSG00000020022	Ndufa12	1.38557e-05	0.00218454	-0.189726	0.043654	7.28026	0.0250924	0.00153931	0.0055752	0.00228238	0.0055752	0.876772	4.85837	2.66064	0.876772
ENSMUSG00000024640	Psat1	1.43275e-05	0.0022361	-0.184424	0.0425058	5.7352	0.0350555	0.00073518	0.00601001	0.00397846	0.00601001	0.880001	4.84383	2.65051	0.880001
ENSMUSG00000025967	Eef1b2	1.47934e-05	0.00228573	-0.147565	0.0340659	8.82073	0.0177437	0.000163245	0.00416924	0.00234806	0.00416924	0.902773	4.82993	2.64098	0.902773
ENSMUSG00000052837	Junb	1.573e-05	0.00240638	0.397143	0.0919694	4.72437	0.184627	0.0097467	0.0218312	0.00813887	0.0218312	1.3169	4.80327	2.61864	1.3169
ENSMUSG00000026254	Eif4e2	1.82086e-05	0.00273147	-0.125812	0.0293555	7.58332	0.00830563	0.000864356	0.00235282	0.00219141	0.00235282	0.916488	4.73972	2.5636	0.916488
ENSMUSG00000115338	Pnp	1.81167e-05	0.00273147	-0.224588	0.0523892	5.73148	0.0374419	0.00426385	0.00598275	0.00398695	0.00598275	0.855839	4.74192	2.5636	0.855839
ENSMUSG00000002393	Nr2f6	1.95304e-05	0.00290158	-0.321363	0.0752572	5.77933	0.0507578	0.00223685	0.0189074	0.00388058	0.0189074	0.800314	4.70929	2.53737	0.800314
ENSMUSG00000047844	Bex4	2.00702e-05	0.00295337	-0.197686	0.0463605	6.3684	0.0298317	0.00194269	0.00608136	0.00293859	0.00608136	0.871948	4.69745	2.52968	0.871948
ENSMUSG00000018286	Psmb6	2.15578e-05	0.00312607	-0.139111	0.0327464	7.83525	0.0163414	0.000389119	0.00361424	0.00215516	0.00361424	0.908079	4.66639	2.505	0.908079
ENSMUSG00000018427	Ypel2	2.16484e-05	0.00312607	0.282105	0.0664217	5.71485	0.0527927	0.0035482	0.0129227	0.00402541	0.0129227	1.21597	4.66457	2.505	1.21597
ENSMUSG00000067818	Myl9	2.24765e-05	0.00321559	-0.708742	0.167205	4.28967	0.2473	0.00637604	0.0979991	0.0117204	0.0979991	0.611853	4.64827	2.49274	0.611853
ENSMUSG00000071547	Nt5dc2	2.27244e-05	0.00322124	-0.108254	0.0255539	8.19686	0.0134533	0.000274809	0.002124	0.00216306	0.00216306	0.92771	4.64351	2.49198	0.92771
ENSMUSG00000057143	Trim12c	2.38712e-05	0.00335304	0.189013	0.0447344	5.78654	0.025179	0.00325612	0.00421492	0.00386505	0.00421492	1.13998	4.62213	2.47456	1.13998
ENSMUSG00000029860	Zyx	2.41554e-05	0.00336239	-0.194062	0.0459586	6.02414	0.0205843	0.00225416	0.00563136	0.00341585	0.00563136	0.874141	4.61699	2.47335	0.874141
ENSMUSG00000029311	Hsd17b11	2.54063e-05	0.00350494	-0.226961	0.0538951	5.5848	0.0471362	0.00430982	0.00653433	0.00435588	0.00653433	0.854433	4.59506	2.45532	0.854433
ENSMUSG00000020949	Fkbp3	2.6275e-05	0.0035927	-0.126226	0.0300284	7.70916	0.0120211	0.00119741	0.000913903	0.00216896	0.00216896	0.916225	4.58046	2.44458	0.916225
ENSMUSG00000020018	Snrpf	2.76666e-05	0.0037498	-0.133366	0.0318155	7.44259	0.0179708	0.000581098	0.00319788	0.00222702	0.00319788	0.911702	4.55804	2.42599	0.911702
ENSMUSG00000022199	Slc22a17	2.81266e-05	0.003779	0.175705	0.041953	7.3633	0.0354427	0.000948099	0.00562277	0.00225211	0.00562277	1.12952	4.55088	2.42262	1.12952
ENSMUSG00000047721	Bola2	2.86473e-05	0.00381577	-0.193307	0.0462019	6.11696	0.0338217	0.00470396	-0.000683031	0.00326527	0.00326527	0.874599	4.54292	2.41842	0.874599
ENSMUSG00000031278	Acsl4	2.94635e-05	0.00385797	-0.143846	0.034433	6.45047	0.0319565	0.0015739	0.00106995	0.00285246	0.00285246	0.905103	4.53072	2.41364	0.905103
ENSMUSG00000022602	Arc	2.92983e-05	0.00385797	-1.07439	0.257101	2.19618	0.431195	0.176901	-0.113845	0.0698757	0.0698757	0.474872	4.53316	2.41364	0.474872
ENSMUSG00000037712	Fermt2	3.07447e-05	0.0039919	-0.158823	0.0381065	6.00997	0.0236235	0.00198135	0.00333248	0.00343984	0.00343984	0.895755	4.51223	2.39882	0.895755
ENSMUSG00000095427	Rps2-ps6	3.14665e-05	0.00405158	-0.199912	0.0480259	5.97709	0.0346971	0.00448336	0.00412753	0.00349665	0.00412753	0.870604	4.50215	2.39238	0.870604
ENSMUSG00000025872	Thoc3	3.1976e-05	0.00408315	-0.172145	0.0413917	6.46509	0.0201351	0.00355843	0.00197384	0.00283779	0.00283779	0.887522	4.49518	2.389	0.887522
ENSMUSG00000097487	Ptges3l	3.3568e-05	0.00425131	-0.768727	0.185334	2.92684	0.265336	0.0838738	0.0443606	0.0392977	0.0443606	0.586935	4.47407	2.37148	0.586935
ENSMUSG00000028953	Abcf2	3.44537e-05	0.004328	-0.106717	0.0257655	7.88039	0.00639439	0.000326109	0.00136854	0.00215231	0.00215231	0.928699	4.46276	2.36371	0.928699
ENSMUSG00000022895	Ets2	3.59028e-05	0.00447366	0.155547	0.0376411	5.73671	0.0346305	0.00131455	0.0035712	0.00397503	0.00397503	1.11384	4.44487	2.34934	1.11384
ENSMUSG00000033910	Gucy1a1	3.83002e-05	0.00473422	0.487456	0.118386	3.55438	0.308766	0.0297763	0.01866	0.0225476	0.0225476	1.40197	4.4168	2.32475	1.40197
ENSMUSG00000026558	Uck2	4.03644e-05	0.00494976	-0.161578	0.0393577	6.45816	0.0236582	0.00293832	0.0011733	0.00284472	0.00284472	0.894046	4.394	2.30542	0.894046
ENSMUSG00000031633	Slc25a4	4.26125e-05	0.0051843	-0.141741	0.0346314	8.58484	0.0182451	0.000168956	0.00430856	0.00225123	0.00430856	0.906425	4.37046	2.28531	0.906425
ENSMUSG00000065990	Aurkaip1	4.34982e-05	0.0052253	-0.141248	0.0345513	6.32973	0.010003	0.00147494	0.00284964	0.00298188	0.00298188	0.906734	4.36153	2.28189	0.906734
ENSMUSG00000032549	Rab6b	4.3964e-05	0.0052253	0.394531	0.0965664	4.28405	0.300203	0.0230369	0.00408262	0.0117767	0.0117767	1.31452	4.3569	2.28189	1.31452
ENSMUSG00000031848	Lsm4	4.38659e-05	0.0052253	-0.14601	0.0357331	6.6047	0.0240439	0.000942913	0.00382401	0.00270477	0.00382401	0.903747	4.35787	2.28189	0.903747
ENSMUSG00000003779	Kif20a	4.4691e-05	0.00527115	-0.111404	0.0272929	8.1186	0.00662606	0.00062558	0.00113801	0.00215538	0.00215538	0.925687	4.34978	2.27809	0.925687
ENSMUSG00000031683	Lsm6	4.57808e-05	0.00535878	-0.146244	0.0358776	7.39329	0.0126996	0.00256336	5.86981e-06	0.00224218	0.00224218	0.9036	4.33932	2.27093	0.9036
ENSMUSG00000040354	Mars1	4.7198e-05	0.00548313	-0.139973	0.0343992	7.15625	0.0123458	0.00208283	0.000700985	0.00233485	0.00233485	0.907536	4.32608	2.26097	0.907536
ENSMUSG00000040767	Snrnp25	4.82379e-05	0.00556212	-0.251091	0.0617841	5.67567	0.0372464	0.00493888	0.0093123	0.00411925	0.0093123	0.840261	4.31661	2.25476	0.840261
ENSMUSG00000039239	Tgfb2	5.03531e-05	0.00576301	0.347336	0.0856778	5.41947	0.0832241	0.00227522	0.02513	0.0048488	0.02513	1.27221	4.29797	2.23935	1.27221
ENSMUSG00000021838	Samd4	5.13716e-05	0.00583635	0.211293	0.0521801	5.35009	0.0458578	0.00357119	0.0065938	0.00508142	0.0065938	1.15773	4.28928	2.23386	1.15773
ENSMUSG00000049091	Sephs2	5.36737e-05	0.00605337	-0.12549	0.0310695	6.91848	0.00902542	0.00114134	0.00108107	0.00246249	0.00246249	0.916692	4.27024	2.218	0.916692
ENSMUSG00000022111	Uchl3	5.72329e-05	0.00640801	-0.153515	0.0381505	6.5106	0.0169745	0.00165027	0.00378345	0.00279321	0.00378345	0.899057	4.24235	2.19328	0.899057
ENSMUSG00000024844	Banf1	5.77509e-05	0.00641949	-0.134361	0.033408	7.11697	0.0158607	0.000799246	0.00336751	0.0023533	0.00336751	0.911073	4.23844	2.1925	0.911073
ENSMUSG00000020091	Eif4ebp2	6.14525e-05	0.00678216	-0.114275	0.0285177	8.26757	0.0100497	0.000586011	0.00245016	0.00217286	0.00245016	0.923846	4.21146	2.16863	0.923846
ENSMUSG00000009569	Mrtfb	6.44327e-05	0.00706063	-0.165016	0.0412957	6.31105	0.0124591	0.0031143	0.00325228	0.00300352	0.00325228	0.891919	4.19089	2.15116	0.891919
ENSMUSG00000021486	Prelid1	6.79703e-05	0.00739584	-0.106547	0.0267486	8.27084	0.00814438	0.00049778	0.000986138	0.00217338	0.00217338	0.928808	4.16768	2.13101	0.928808
ENSMUSG00000032058	Ppp2r1b	7.03248e-05	0.00754575	-0.11535	0.0290176	7.38569	0.00896538	0.000597299	0.00254624	0.00224465	0.00254624	0.923158	4.15289	2.1223	0.923158
ENSMUSG00000095098	Ccdc85b	7.0021e-05	0.00754575	-0.149956	0.0377133	6.13535	0.0110262	0.00207286	0.00278114	0.00323703	0.00323703	0.901278	4.15477	2.1223	0.901278
ENSMUSG00000030867	Plk1	7.33105e-05	0.00775836	-0.123412	0.0311231	6.28456	0.0117251	0.000581159	0.000827583	0.00303512	0.00303512	0.918014	4.13483	2.11023	0.918014
ENSMUSG00000021364	Elovl2	7.31037e-05	0.00775836	-0.145939	0.0367979	6.24644	0.0267917	0.00197267	0.000962735	0.00308259	0.00308259	0.903791	4.13606	2.11023	0.903791
ENSMUSG00000031604	Msmo1	7.39793e-05	0.00777587	-0.244893	0.061793	6.54732	0.0489568	0.00284984	0.0114054	0.0027582	0.0114054	0.843879	4.13089	2.10925	0.843879
ENSMUSG00000067367	Lyar	7.75636e-05	0.00809753	-0.121706	0.0307976	6.65353	0.0160641	0.000880602	0.00261185	0.00266044	0.00266044	0.9191	4.11034	2.09165	0.9191
ENSMUSG00000038379	Ttk	8.06788e-05	0.00836623	-0.119591	0.0303349	7.11684	0.00833716	0.00108207	0.0017549	0.00235336	0.00235336	0.920448	4.09324	2.07747	0.920448
ENSMUSG00000027496	Aurka	8.20489e-05	0.00845159	-0.111126	0.0282165	7.0341	0.00950027	0.000576908	0.000878698	0.00239546	0.00239546	0.925865	4.08593	2.07306	0.925865
ENSMUSG00000090841	Myl6	8.49946e-05	0.00863982	-0.144502	0.0367702	7.84974	0.0105644	0.000352537	0.00469511	0.00215413	0.00469511	0.904692	4.07061	2.0635	0.904692
ENSMUSG00000046865	Fbl	8.47565e-05	0.00863982	-0.135591	0.0344968	7.34346	0.0205199	0.000384107	0.00405866	0.00225896	0.00405866	0.910297	4.07183	2.0635	0.910297
ENSMUSG00000037169	Mycn	8.61435e-05	0.00869937	-0.166411	0.0423801	7.42575	0.109967	0.000651941	0.00605341	0.00223204	0.00605341	0.891056	4.06478	2.06051	0.891056
ENSMUSG00000021670	Hmgcr	8.68988e-05	0.00871866	-0.139636	0.0355802	6.37146	0.0197094	0.00179096	0.00235958	0.00293525	0.00293525	0.907748	4.06099	2.05955	0.907748
ENSMUSG00000071359	Tbpl1	9.4119e-05	0.00926263	-0.169894	0.0435037	6.30533	0.0186812	0.00405534	0.00246421	0.00301026	0.00301026	0.888908	4.02632	2.03327	0.888908
ENSMUSG00000008373	Prpf31	9.30186e-05	0.00926263	-0.111254	0.0284674	7.79691	0.0111513	0.000867017	0.00106751	0.00215845	0.00215845	0.925783	4.03143	2.03327	0.925783
ENSMUSG00000023960	Enpp5	9.39058e-05	0.00926263	0.291647	0.0746698	4.51595	0.0316783	0.0111406	-0.00192737	0.00967487	0.00967487	1.22404	4.02731	2.03327	1.22404
ENSMUSG00000045193	Cirbp	9.48734e-05	0.00927777	-0.123965	0.0317586	6.80928	0.0152688	0.00122961	0.00180677	0.00253587	0.00253587	0.917662	4.02286	2.03256	0.917662
ENSMUSG00000005575	Ube2m	9.7352e-05	0.00946029	-0.117197	0.030073	6.98972	0.00864033	0.000956371	0.00218322	0.00241999	0.00241999	0.921977	4.01165	2.0241	0.921977
ENSMUSG00000028745	Capzb	9.93335e-05	0.00959251	-0.129255	0.0332087	7.35519	0.0090972	0.000331929	0.00378526	0.00225488	0.00378526	0.914303	4.0029	2.01807	0.914303
ENSMUSG00000029166	Mapre3	0.000100691	0.00960356	0.264117	0.0679152	5.37908	0.0397446	0.0122377	0.00441946	0.00498223	0.00498223	1.2009	3.99701	2.01757	1.2009
ENSMUSG00000027765	P2ry1	0.000100129	0.00960356	0.319055	0.0820135	5.13446	0.0752091	0.00973766	0.0153736	0.00591893	0.0153736	1.24751	3.99944	2.01757	1.24751
ENSMUSG00000034932	Mrpl54	0.000107095	0.00992843	-0.149401	0.0385658	6.0192	0.0195496	0.00212849	0.00166876	0.00342417	0.00342417	0.901625	3.97023	2.00312	0.901625
ENSMUSG00000067194	Eif1ax	0.000107254	0.00992843	-0.175088	0.0452008	8.6406	0.027123	0.00261623	0.00501138	0.00227103	0.00501138	0.885713	3.96959	2.00312	0.885713
ENSMUSG00000073676	Hspe1	0.000106803	0.00992843	-0.150631	0.0388765	8.15409	0.0219424	0.000352013	0.00529049	0.00215845	0.00529049	0.900857	3.97142	2.00312	0.900857
ENSMUSG00000064373	Selenop	0.00010731	0.00992843	0.187856	0.0484984	5.14111	0.0350024	0.00179155	0.00698961	0.00589027	0.00698961	1.13907	3.96936	2.00312	1.13907
ENSMUSG00000001467	Cyp51	0.000105637	0.00992843	-0.16809	0.0433526	5.79622	0.026361	0.000883186	0.00613343	0.00384445	0.00613343	0.89002	3.97619	2.00312	0.89002
ENSMUSG00000031948	Kars	0.00011059	0.00994628	-0.100669	0.0260389	8.35897	0.0111156	0.000341689	0.00170817	0.0021896	0.0021896	0.9326	3.95628	2.00234	0.9326
ENSMUSG00000040649	Rimklb	0.000110722	0.00994628	0.252641	0.0653527	5.19899	0.0254674	0.0102964	0.0012197	0.0056486	0.0056486	1.19139	3.95577	2.00234	1.19139
ENSMUSG00000067038	Rps12-ps3	0.000109566	0.00994628	-0.141039	0.0364595	9.21261	0.0187778	0.00011861	0.00484408	0.00259094	0.00484408	0.906866	3.96032	2.00234	0.906866
ENSMUSG00000028044	Cks1b	0.000109425	0.00994628	-0.112835	0.0291664	7.49527	0.0217115	0.000460617	0.00271524	0.00221237	0.00271524	0.924769	3.96088	2.00234	0.924769
ENSMUSG00000024791	Cdca5	0.00010834	0.00994628	-0.124149	0.0320707	6.64919	0.0140195	0.00117555	0.00198032	0.00266429	0.00266429	0.917545	3.96521	2.00234	0.917545
ENSMUSG00000017716	Birc5	0.000115731	0.0103362	-0.128819	0.0334162	8.32575	0.0129815	0.000643904	0.00352489	0.00218298	0.00352489	0.91458	3.93655	1.98564	0.91458
ENSMUSG00000006219	Fblim1	0.000122784	0.0107792	-0.167279	0.0435566	5.62309	0.0315792	0.00282987	0.00365265	0.00425292	0.00425292	0.890521	3.91086	1.96741	0.890521
ENSMUSG00000037894	H2az1	0.000121977	0.0107792	-0.108694	0.0282901	9.41108	0.014498	0.000106063	0.00288183	0.00275866	0.00288183	0.927427	3.91372	1.96741	0.927427
ENSMUSG00000035960	Apex1	0.000122525	0.0107792	-0.161461	0.0420359	7.92686	0.0195179	0.000399902	0.00619697	0.00215052	0.00619697	0.894119	3.91178	1.96741	0.894119
ENSMUSG00000026421	Csrp1	0.000133658	0.0116675	-0.182085	0.047671	6.99459	0.071324	0.00108875	0.00739532	0.00241723	0.00739532	0.881428	3.87401	1.93302	0.881428
ENSMUSG00000029810	Tmem176b	0.00013545	0.0117575	0.276242	0.0723842	5.64023	0.0545139	0.00442531	0.0151354	0.00420833	0.0151354	1.21104	3.86822	1.92968	1.21104
ENSMUSG00000018293	Pfn1	0.000147457	0.0127283	-0.113497	0.0299045	8.87705	0.0117959	0.000130009	0.00320864	0.00237639	0.00320864	0.924345	3.83133	1.89523	0.924345
ENSMUSG00000038489	Polr2l	0.000150859	0.0128772	-0.159527	0.0420954	6.23017	0.0137126	0.00222042	0.00439514	0.00310365	0.00439514	0.895319	3.82143	1.89018	0.895319
ENSMUSG00000025950	Idh1	0.000151349	0.0128772	-0.112677	0.0297392	6.45449	0.0124626	0.000453435	0.00171295	0.0028484	0.0028484	0.92487	3.82002	1.89018	0.92487
ENSMUSG00000031924	Cyb5b	0.000151683	0.0128772	-0.0988425	0.0260915	7.7932	0.00831402	0.000382726	0.000652294	0.00215881	0.00215881	0.933782	3.81906	1.89018	0.933782
ENSMUSG00000074280	Gm6166	0.000154875	0.0130764	-0.194402	0.0513868	6.26637	0.0376742	0.0021132	0.00774505	0.00305747	0.00774505	0.873935	3.81002	1.88351	0.873935
ENSMUSG00000034880	Mrpl34	0.000159597	0.0134018	-0.13648	0.0361476	6.58227	0.0227066	0.00143357	0.00344459	0.00272551	0.00344459	0.909736	3.79697	1.87284	0.909736
ENSMUSG00000021131	Erh	0.000161807	0.0135139	-0.0997468	0.0264425	8.05642	0.0093885	0.00045873	0.00179542	0.00215164	0.00215164	0.933197	3.791	1.86922	0.933197
ENSMUSG00000027679	Dnajc19	0.000163151	0.013553	-0.180974	0.048002	5.60936	0.0303599	0.00431293	0.00388421	0.00428937	0.00428937	0.882107	3.78741	1.86797	0.882107
ENSMUSG00000020392	Cdkn2aipnl	0.000171326	0.0141559	-0.11537	0.0307004	6.64781	0.00789441	0.000853215	0.000947057	0.00266551	0.00266551	0.923146	3.76618	1.84906	0.923146
ENSMUSG00000102252	Snrpn	0.000176226	0.0144833	-0.137586	0.0366812	6.54102	0.0296837	0.00154608	0.00347716	0.00276416	0.00347716	0.909039	3.75393	1.83913	0.909039
ENSMUSG00000061411	Nol4l	0.00018051	0.014694	0.147973	0.0395138	6.03548	0.0115573	0.00243214	0.00191293	0.00339686	0.00339686	1.10801	3.7435	1.83286	1.10801
ENSMUSG00000068856	Sf3b4	0.000181422	0.014694	-0.105049	0.0280612	7.16109	0.00514536	0.000607105	0.00158751	0.00233264	0.00233264	0.929773	3.74131	1.83286	0.929773
ENSMUSG00000039640	Mrpl12	0.000181848	0.014694	-0.157451	0.0420656	6.8256	0.022293	0.000977373	0.00562881	0.00252422	0.00562881	0.896608	3.74029	1.83286	0.896608
ENSMUSG00000054766	Set	0.000182593	0.014694	-0.100659	0.0269001	9.10012	0.00741169	0.000191621	0.00190585	0.00250989	0.00250989	0.932607	3.73852	1.83286	0.932607
ENSMUSG00000056481	Cd248	0.00018542	0.0148441	-0.172857	0.046242	6.80405	0.04368	0.00118752	0.00679557	0.00253965	0.00679557	0.887084	3.73184	1.82844	0.887084
ENSMUSG00000007721	Ccdc124	0.000189348	0.0150539	-0.158946	0.0425808	6.34596	0.0177505	0.0014312	0.00533781	0.00296347	0.00533781	0.895679	3.72274	1.82235	0.895679
ENSMUSG00000024665	Fads2	0.000189989	0.0150539	-0.106012	0.0284065	6.65477	0.00992563	0.000353188	0.00117589	0.00265934	0.00265934	0.929153	3.72127	1.82235	0.929153
ENSMUSG00000051579	Tceal8	0.000195869	0.0152183	-0.106972	0.0287228	7.06848	0.00919302	0.000662869	0.00241712	0.00237741	0.00241712	0.928535	3.70804	1.81763	0.928535
ENSMUSG00000042742	Bmt2	0.000193244	0.0152183	0.115612	0.0310144	6.89355	0.011779	0.00111273	0.0016258	0.00247833	0.00247833	1.08343	3.71389	1.81763	1.08343
ENSMUSG00000047793	Sned1	0.000196045	0.0152183	0.292247	0.0784755	4.96738	0.119041	0.016282	0.0024758	0.00670931	0.00670931	1.22455	3.70764	1.81763	1.22455
ENSMUSG00000039109	F13a1	0.000196988	0.0152183	0.373519	0.100332	4.42773	0.0943018	0.014003	0.0235784	0.0104225	0.0235784	1.29551	3.70556	1.81763	1.29551
ENSMUSG00000024940	Ltbp3	0.000196784	0.0152183	0.332283	0.0892488	4.82575	0.152878	0.0124948	0.0172426	0.00749861	0.0172426	1.259	3.70601	1.81763	1.259
ENSMUSG00000041417	Pik3r1	0.000198169	0.0152334	0.207112	0.0556552	4.65239	0.0496754	0.00292946	0.00441011	0.00863454	0.00863454	1.15437	3.70296	1.8172	1.15437
ENSMUSG00000081087	Rps15a-ps7	0.000204254	0.0154072	0.410061	0.110419	4.54817	0.12029	0.0193466	0.0261711	0.00941682	0.0261711	1.32874	3.68983	1.81228	1.32874
ENSMUSG00000028013	Ppa2	0.000203043	0.0154072	-0.14874	0.0400356	6.16676	0.0128673	0.00226918	0.00371479	0.00319067	0.00371479	0.902038	3.69241	1.81228	0.902038
ENSMUSG00000075266	Cenpw	0.000202318	0.0154072	-0.152673	0.0410843	6.58418	0.0128865	0.00258518	0.00371637	0.00272373	0.00371637	0.899582	3.69396	1.81228	0.899582
ENSMUSG00000048327	Ckap2l	0.000204419	0.0154072	-0.098767	0.0265968	7.65859	0.00571594	0.00046399	0.00112751	0.00217693	0.00217693	0.933831	3.68948	1.81228	0.933831
ENSMUSG00000020267	Hint1	0.000207884	0.0155923	-0.135429	0.0365112	7.64551	0.018207	0.0004793	0.00449749	0.00217922	0.00449749	0.910399	3.68218	1.80709	0.910399
ENSMUSG00000074088	Snrnp40	0.000213978	0.0159719	-0.0997894	0.0269562	7.48962	0.00733894	0.000498905	0.00208598	0.00221386	0.00221386	0.933169	3.66963	1.79664	0.933169
ENSMUSG00000056952	Tatdn2	0.000220517	0.0161233	-0.130078	0.0352106	6.58515	0.00944173	0.0019057	0.00268934	0.00272283	0.00272283	0.913782	3.65656	1.79255	0.913782
ENSMUSG00000031479	Vps36	0.000221225	0.0161233	-0.122382	0.0331347	6.72847	0.0159086	0.00143915	0.00265972	0.00259734	0.00265972	0.91867	3.65517	1.79255	0.91867
ENSMUSG00000037070	Rbmxl1	0.000220634	0.0161233	-0.119424	0.0323279	8.37934	0.00746277	0.00022454	0.00367714	0.00219397	0.00367714	0.920555	3.65633	1.79255	0.920555
ENSMUSG00000079478	Znrd2	0.000217088	0.0161233	-0.19181	0.051865	5.84274	0.0372487	0.00394729	0.0060953	0.0037485	0.0060953	0.875507	3.66336	1.79255	0.875507
ENSMUSG00000028248	Pnisr	0.000218125	0.0161233	0.106453	0.028794	7.03567	0.0134328	0.000677247	0.00241805	0.00239462	0.00241805	1.07658	3.66129	1.79255	1.07658
ENSMUSG00000001056	Nhp2	0.000223641	0.0161919	-0.171143	0.0463713	6.81228	0.0398135	0.00109924	0.00692856	0.00253371	0.00692856	0.888139	3.65045	1.7907	0.888139
ENSMUSG00000016528	Mapkapk2	0.000224262	0.0161919	-0.100456	0.0272238	7.23702	0.00838943	0.000467167	0.00125461	0.00229974	0.00229974	0.932738	3.64924	1.7907	0.932738
ENSMUSG00000018428	Akap1	0.000231799	0.0166583	-0.129844	0.0352685	6.52784	0.00708834	0.0018671	0.000890422	0.00277667	0.00277667	0.913931	3.63489	1.77837	0.913931
ENSMUSG00000027566	Psma7	0.000234082	0.0167445	-0.100108	0.02721	7.98498	0.0113167	0.000513764	0.00225034	0.00214991	0.00225034	0.932963	3.63063	1.77613	0.932963
ENSMUSG00000035493	Tgfbi	0.000243605	0.0173454	0.186475	0.050826	6.07349	0.0169219	0.000519878	0.00912439	0.00333446	0.00912439	1.13798	3.61331	1.76082	1.13798
ENSMUSG00000070713	Gm10282	0.000246975	0.0175046	-0.100989	0.0275521	8.2528	0.00605422	0.000378914	0.00245512	0.00217059	0.00245512	0.932394	3.60735	1.75685	0.932394
ENSMUSG00000004035	Gstm7	0.000256264	0.0179711	0.246942	0.067546	4.88925	0.0377144	0.00466847	0.0123647	0.00713015	0.0123647	1.18669	3.59131	1.74543	1.18669
ENSMUSG00000027654	Fam83d	0.000257045	0.0179711	-0.120995	0.0331028	6.68447	0.00825632	0.00145734	0.00136643	0.00263364	0.00263364	0.919553	3.58999	1.74543	0.919553
ENSMUSG00000027342	Pcna	0.000256962	0.0179711	-0.0949655	0.0259808	7.92219	0.00969561	0.000229032	0.00229098	0.00215065	0.00229098	0.936295	3.59013	1.74543	0.936295
ENSMUSG00000005683	Cs	0.000258484	0.0179902	-0.0941979	0.0257815	8.66814	0.00727881	0.000199982	0.000875837	0.00228151	0.00228151	0.936793	3.58757	1.74496	0.936793
ENSMUSG00000063445	Nmral1	0.000261227	0.0180996	-0.0994421	0.027237	7.5871	0.00888699	0.000528395	0.00224119	0.00219061	0.00224119	0.933394	3.58298	1.74233	0.933394
ENSMUSG00000099397	Gm7809	0.000264896	0.0182719	-0.556133	0.152473	3.12278	0.126517	0.0536089	0.00569832	0.0331842	0.0331842	0.680123	3.57692	1.73822	0.680123
ENSMUSG00000029675	Eln	0.000271588	0.0186502	0.456175	0.125289	5.51727	0.198217	0.00325094	0.055352	0.00454739	0.055352	1.3719	3.56609	1.72932	1.3719
ENSMUSG00000031274	Col4a5	0.000274468	0.0187646	0.156751	0.0430839	6.07797	0.0247123	0.00267846	0.00425143	0.00332722	0.00425143	1.11477	3.56151	1.72666	1.11477
ENSMUSG00000023505	Cdca3	0.000278931	0.0189857	-0.140565	0.0386792	6.66275	0.0148904	0.00199914	0.00358623	0.00265234	0.00358623	0.907164	3.5545	1.72157	0.907164
ENSMUSG00000041431	Ccnb1	0.000281523	0.0190781	-0.100703	0.0277285	7.65567	0.0104228	0.000693011	0.000523591	0.00217744	0.00217744	0.932579	3.55049	1.71946	0.932579
ENSMUSG00000039542	Ncam1	0.000287694	0.0194112	0.192406	0.053061	5.98642	0.0744878	0.00174171	0.00876936	0.00348037	0.00876936	1.14267	3.54107	1.71195	1.14267
ENSMUSG00000040204	Pclaf	0.000290828	0.0194528	-0.14286	0.0394278	8.78657	0.0280381	0.000683764	0.00511989	0.00233188	0.00511989	0.905722	3.53636	1.71102	0.905722
ENSMUSG00000017009	Sdc4	0.000290206	0.0194528	0.17917	0.0494414	5.37968	0.0221949	0.00414572	0.00407042	0.00498023	0.00498023	1.13223	3.53729	1.71102	1.13223
ENSMUSG00000037710	Cisd1	0.000301831	0.0200154	-0.155913	0.0431446	5.84019	0.0161445	0.00319582	-0.000702756	0.00375362	0.00375362	0.897564	3.52024	1.69864	0.897564
ENSMUSG00000001175	Calm1	0.000300627	0.0200154	-0.109853	0.0303901	8.94819	0.0215954	0.000825715	0.00262224	0.0024152	0.00262224	0.926683	3.52197	1.69864	0.926683
ENSMUSG00000024007	Ppil1	0.000306576	0.0202432	-0.101232	0.0280447	7.22535	0.00787601	0.000631692	0.00175888	0.00230459	0.00230459	0.932236	3.51346	1.69372	0.932236
ENSMUSG00000030663	1110004F10Rik	0.000311721	0.0202446	-0.102217	0.0283513	7.5083	0.00979087	0.000372801	0.00262803	0.00220899	0.00262803	0.931601	3.50623	1.69369	0.931601
ENSMUSG00000038690	Atp5j2	0.00031708	0.0202446	-0.134817	0.0374396	7.20204	0.0152091	0.000874576	0.00435852	0.0023145	0.00435852	0.910785	3.49883	1.69369	0.910785
ENSMUSG00000018381	Abi3	0.000308796	0.0202446	0.633419	0.175569	3.01041	0.193778	0.0784899	0.0018282	0.036588	0.036588	1.55124	3.51033	1.69369	1.55124
ENSMUSG00000020089	Ppa1	0.000312818	0.0202446	-0.156444	0.043403	7.20186	0.0267268	0.000436482	0.00659646	0.00231458	0.00659646	0.897234	3.50471	1.69369	0.897234
ENSMUSG00000029599	Ddx54	0.000315661	0.0202446	-0.101383	0.0281456	7.16227	0.0106978	0.000625352	0.00144756	0.00233211	0.00233211	0.932139	3.50078	1.69369	0.932139
ENSMUSG00000036502	Tmem255a	0.000315823	0.0202446	0.154721	0.0429546	6.3976	0.0117787	0.00302761	0.00386076	0.00290713	0.00386076	1.11321	3.50056	1.69369	1.11321
ENSMUSG00000068267	Cenpb	0.000314146	0.0202446	-0.107561	0.0298503	7.92777	0.00711055	0.000405136	0.00292141	0.0021505	0.00292141	0.928156	3.50287	1.69369	0.928156
ENSMUSG00000034771	Tle2	0.000315693	0.0202446	0.277657	0.0770827	5.04454	0.205315	0.00936149	0.012821	0.00632699	0.012821	1.21222	3.50073	1.69369	1.21222
ENSMUSG00000020307	Cdc34	0.000331079	0.0209768	-0.128812	0.035884	6.24809	0.0187292	0.000969627	0.00383765	0.00308049	0.00383765	0.914584	3.48007	1.67826	0.914584
ENSMUSG00000020708	Psmc5	0.000331262	0.0209768	-0.093055	0.0259239	7.90447	0.00776066	0.00035775	0.00211053	0.00215124	0.00215124	0.937535	3.47983	1.67826	0.937535
ENSMUSG00000024906	Mus81	0.000332873	0.0209928	-0.260298	0.0725414	4.8284	0.0278015	0.012163	0.000338587	0.0074827	0.0074827	0.834915	3.47772	1.67793	0.834915
ENSMUSG00000050966	Lin28a	0.000337896	0.021137	-0.721431	0.201271	2.24089	0.438007	0.0285698	0.122668	0.0676088	0.122668	0.606496	3.47122	1.67496	0.606496
ENSMUSG00000057572	Zbtb8os	0.000336676	0.021137	-0.168805	0.0470825	5.70618	0.0232098	0.00423014	0.00101698	0.00404578	0.00404578	0.889579	3.47279	1.67496	0.889579
ENSMUSG00000018770	Atp5g3	0.000340364	0.0212055	-0.109577	0.0305871	8.28694	0.00974222	0.000274699	0.00321811	0.00217602	0.00321811	0.92686	3.46806	1.67355	0.92686
ENSMUSG00000114547	Gm3226	0.000349356	0.0216783	-0.154144	0.0431093	7.01665	0.0161128	0.00164259	0.0052955	0.00240494	0.0052955	0.898665	3.45673	1.66397	0.898665
ENSMUSG00000020738	Sumo2	0.000351544	0.0217268	-0.0945939	0.0264671	8.97965	0.00644847	0.000118386	0.00249684	0.00243347	0.00249684	0.936536	3.45402	1.663	0.936536
ENSMUSG00000042286	Stab1	0.000355502	0.0218839	0.274149	0.076769	4.95508	0.0572603	0.0152291	0.000479031	0.00677325	0.00677325	1.20928	3.44916	1.65987	1.20928
ENSMUSG00000030122	Ptms	0.000368193	0.0223974	-0.167316	0.0469741	7.86403	0.016046	0.00037668	0.00786115	0.00215322	0.00786115	0.890498	3.43392	1.6498	0.890498
ENSMUSG00000116995	Gm21926	0.000366101	0.0223974	-0.150905	0.0423486	6.18113	0.011549	0.00266812	0.00402727	0.0031702	0.00402727	0.900686	3.4364	1.6498	0.900686
ENSMUSG00000040097	Flywch1	0.000367848	0.0223974	-0.102987	0.0289116	7.92418	0.00592343	0.000970037	0.00203221	0.00215059	0.00215059	0.931103	3.43433	1.6498	0.931103
ENSMUSG00000035198	Tubg1	0.000374227	0.0225867	-0.115667	0.0325125	6.83471	0.0164593	0.000673835	0.00327254	0.00251783	0.00327254	0.922955	3.42686	1.64615	0.922955
ENSMUSG00000035351	Nup37	0.000373373	0.0225867	-0.127579	0.0358547	6.26388	0.0177953	0.00173887	0.00187311	0.00306056	0.00306056	0.915366	3.42786	1.64615	0.915366
ENSMUSG00000078812	Eif5a	0.000381174	0.0227536	-0.13838	0.0389498	9.49941	0.0284659	0.000164152	0.00549963	0.00284427	0.00549963	0.908539	3.41888	1.64295	0.908539
ENSMUSG00000074622	Mafb	0.000379372	0.0227536	0.189436	0.0533017	5.51158	0.0599199	0.00446332	0.00614333	0.00456413	0.00614333	1.14032	3.42094	1.64295	1.14032
ENSMUSG00000019303	Psmc3ip	0.000381412	0.0227536	-0.140245	0.0394765	6.1385	0.0121231	0.00258574	-0.000121074	0.00323227	0.00323227	0.907365	3.41861	1.64295	0.907365
ENSMUSG00000020549	Elac2	0.000387578	0.0229706	-0.114846	0.0323656	6.76849	0.00909518	0.00134469	0.00198815	0.00256609	0.00256609	0.923481	3.41164	1.63883	0.923481
ENSMUSG00000027404	Snrpb	0.000388022	0.0229706	-0.102103	0.0287768	8.38997	0.014915	0.000370629	0.00272097	0.00219634	0.00272097	0.931674	3.41114	1.63883	0.931674
ENSMUSG00000058709	Egln2	0.000396855	0.0234038	-0.113262	0.0319753	6.55161	0.00747626	0.00104586	0.00277117	0.00275416	0.00277117	0.924496	3.40137	1.63071	0.924496
ENSMUSG00000034723	Tmx4	0.00040499	0.0237928	0.10633	0.0300639	6.70841	0.0067152	0.000760711	0.00157807	0.00261363	0.00261363	1.07649	3.39256	1.62356	1.07649
ENSMUSG00000066878	Gm10184	0.000415083	0.0242934	-0.092161	0.0261057	8.89525	0.00743294	0.000158297	0.00179504	0.002386	0.002386	0.938116	3.38187	1.61451	0.938116
ENSMUSG00000029249	Rest	0.000418251	0.0243864	0.0992297	0.028124	8.00074	0.0156634	0.000336952	0.00261596	0.00215006	0.00261596	1.0712	3.37856	1.61285	1.0712
ENSMUSG00000052551	Adarb2	0.000422952	0.0245678	-0.245926	0.0697596	5.19786	0.0393266	0.00907003	0.00909789	0.00565321	0.00909789	0.843274	3.37371	1.60963	0.843274
ENSMUSG00000041840	Haus1	0.000427153	0.024635	-0.152933	0.0434135	6.19201	0.0123955	0.00265447	0.00438187	0.00315501	0.00438187	0.89942	3.36942	1.60845	0.89942
ENSMUSG00000061981	Flot2	0.000427299	0.024635	-0.115878	0.0328955	6.65365	0.00733421	0.00137955	0.000212422	0.00266033	0.00266033	0.92282	3.36927	1.60845	0.92282
ENSMUSG00000040385	Ppp1ca	0.0004293	0.0246584	-0.0954451	0.0271044	7.82138	0.0118585	0.000205265	0.00253743	0.00215626	0.00253743	0.935983	3.36724	1.60803	0.935983
ENSMUSG00000031807	Pgls	0.000436024	0.0248624	-0.121742	0.0346128	7.00023	0.0101871	0.00123555	0.00323715	0.00241406	0.00323715	0.919077	3.36049	1.60446	0.919077
ENSMUSG00000067608	Pcna-ps2	0.00043607	0.0248624	-0.119702	0.0340329	6.72686	0.00965665	0.00172546	0.00122996	0.00259863	0.00259863	0.920378	3.36044	1.60446	0.920378
ENSMUSG00000041685	Fcho2	0.000445154	0.0251944	0.115187	0.0328005	6.65872	0.0138842	0.00136073	0.00139681	0.00265586	0.00265586	1.08312	3.35149	1.5987	1.08312
ENSMUSG00000022658	Tagln3	0.000444055	0.0251944	-0.155502	0.0442721	5.73385	0.0125014	0.00333586	0.00286221	0.00398154	0.00398154	0.89782	3.35256	1.5987	0.89782
ENSMUSG00000002580	Mien1	0.00046065	0.0259763	-0.227125	0.0648438	5.30127	0.0307968	0.00515713	0.0105405	0.00525522	0.0105405	0.854335	3.33663	1.58542	0.854335
ENSMUSG00000050714	Zbtb26	0.000464074	0.0260293	0.119931	0.0342593	6.56563	0.00894722	0.0016408	0.00245941	0.002741	0.002741	1.08668	3.33341	1.58454	1.08668
ENSMUSG00000022337	Emc2	0.000466644	0.0260293	-0.117257	0.0335095	6.59305	0.00696378	0.00147659	0.00216981	0.00271552	0.00271552	0.921939	3.33101	1.58454	0.921939
ENSMUSG00000025364	Pa2g4	0.000465616	0.0260293	-0.101982	0.0291393	8.70647	0.0103555	0.000190263	0.00297971	0.00229685	0.00297971	0.931752	3.33197	1.58454	0.931752
ENSMUSG00000019916	P4ha1	0.000474747	0.026386	0.155875	0.0446044	7.30799	0.0145542	0.000763275	0.00666439	0.00227181	0.00666439	1.1141	3.32354	1.57863	1.1141
ENSMUSG00000069014	Gm5641	0.000481912	0.0266883	-0.100373	0.0287552	9.33978	0.0114853	0.000392325	0.00136573	0.00269462	0.00269462	0.932792	3.31703	1.57368	0.932792
ENSMUSG00000051220	Ercc6l	0.000492899	0.0271743	-0.100129	0.0287347	7.19209	0.00873928	0.000763737	0.00165913	0.00231882	0.00231882	0.93295	3.30724	1.56584	0.93295
ENSMUSG00000024360	Etf1	0.000494206	0.0271743	-0.0886936	0.0254583	8.49039	0.00739536	0.00019778	0.00194178	0.00222189	0.00222189	0.940374	3.30609	1.56584	0.940374
ENSMUSG00000069302	H2ac12	0.00050768	0.0277179	-0.211155	0.0607348	7.60245	0.0240048	0.0013313	0.0124399	0.00218743	0.0124399	0.863846	3.29441	1.55724	0.863846
ENSMUSG00000037103	Dcaf15	0.000507532	0.0277179	-0.100421	0.0288835	7.19685	0.0126595	0.000797809	0.00164839	0.00231675	0.00231675	0.932761	3.29454	1.55724	0.932761
ENSMUSG00000016409	Nkap	0.000516543	0.0281025	0.174741	0.0503281	6.17316	0.0163026	0.00553549	0.00392073	0.0031815	0.00392073	1.12876	3.28689	1.55126	1.12876
ENSMUSG00000033857	Engase	0.000521416	0.0282681	-0.302095	0.0870714	5.18745	0.0728922	0.0226084	-0.00974894	0.00569565	0.00569565	0.811074	3.28282	1.5487	0.811074
ENSMUSG00000018189	Uchl5	0.000529762	0.0286023	-0.147801	0.0426525	5.86637	0.0201969	0.00309019	0.00132425	0.00370162	0.00370162	0.902625	3.27592	1.5436	0.902625
ENSMUSG00000024613	Tcof1	0.000531283	0.0286023	-0.0903221	0.026071	7.86247	0.00486418	0.000384225	0.00121042	0.00215331	0.00215331	0.939313	3.27467	1.5436	0.939313
ENSMUSG00000048758	Rpl29	0.000533179	0.0286047	-0.202861	0.0585709	5.19326	0.037865	0.00713546	0.00129682	0.00567191	0.00567191	0.868826	3.27313	1.54356	0.868826
ENSMUSG00000028998	Tomm7	0.000540335	0.0288883	-0.134068	0.038749	6.80943	0.0228987	0.00115056	0.00445498	0.00253576	0.00445498	0.911258	3.26734	1.53928	0.911258
ENSMUSG00000039244	E130309D02Rik	0.000548891	0.029144	-0.119433	0.0345614	6.5809	0.00953706	0.00122531	0.00323412	0.00272678	0.00323412	0.920549	3.26051	1.53545	0.920549
ENSMUSG00000070639	Lrrc8b	0.00054883	0.029144	-0.122499	0.0354481	6.41084	0.0565504	0.00179801	0.00232363	0.00289317	0.00289317	0.918595	3.26056	1.53545	0.918595
ENSMUSG00000013701	Timm23	0.000551148	0.0291637	-0.14	0.0405259	6.90746	0.0185139	0.000662468	0.00546898	0.00246943	0.00546898	0.907519	3.25873	1.53516	0.907519
ENSMUSG00000025204	Ndufb8	0.000553458	0.0291859	-0.138631	0.0401426	6.4241	0.0191437	0.00127445	0.00474157	0.00287938	0.00474157	0.908381	3.25692	1.53483	0.908381
ENSMUSG00000042462	Dctpp1	0.000564636	0.0296741	-0.166788	0.0483717	6.79959	0.0301693	0.00106701	0.00766832	0.0025429	0.00766832	0.890824	3.24823	1.52762	0.890824
ENSMUSG00000109324	Prmt1	0.000569927	0.0298507	-0.103314	0.0299848	8.62735	0.0137064	0.000242517	0.00311408	0.00226616	0.00311408	0.930892	3.24418	1.52505	0.930892
ENSMUSG00000020439	Smtn	0.000578953	0.0302209	-0.127995	0.0371939	6.47191	0.0112039	0.00233363	0.00171087	0.00283101	0.00283101	0.915102	3.23736	1.51969	0.915102
ENSMUSG00000002396	Ocel1	0.000582912	0.0303251	-0.269347	0.0783112	4.59519	0.0516061	0.0138411	0.00192117	0.00905414	0.00905414	0.829695	3.2344	1.5182	0.829695
ENSMUSG00000031740	Mmp2	0.000588981	0.0305259	0.10922	0.0317809	6.91241	0.0097312	0.000389415	0.00338136	0.0024663	0.00338136	1.07864	3.2299	1.51533	1.07864
ENSMUSG00000024556	Me2	0.000590723	0.0305259	-0.142727	0.0415407	7.05268	0.011975	0.00169882	0.00474353	0.00238561	0.00474353	0.905805	3.22862	1.51533	0.905805
ENSMUSG00000005442	Cic	0.00059692	0.0305398	0.146089	0.0425543	5.7768	0.0201728	0.00287453	-9.67955e-05	0.00388604	0.00388604	1.10657	3.22408	1.51513	1.10657
ENSMUSG00000024067	Dpy30	0.000593917	0.0305398	-0.149771	0.0436093	6.47095	0.0212159	0.00149394	0.005606	0.00283197	0.005606	0.901394	3.22627	1.51513	0.901394
ENSMUSG00000021243	Fcf1	0.00059539	0.0305398	-0.122594	0.035703	6.30908	0.0102696	0.00175306	0.00238185	0.00300584	0.00300584	0.918535	3.2252	1.51513	0.918535
ENSMUSG00000021266	Wars	0.000617774	0.0314295	-0.100904	0.0294724	7.17279	0.0080566	0.000774863	0.00246798	0.00232736	0.00246798	0.932448	3.20917	1.50266	0.932448
ENSMUSG00000001525	Tubb5	0.000622446	0.0314295	-0.0950239	0.0277714	9.50267	0.00558083	3.17817e-05	0.0012469	0.00284756	0.00284756	0.936257	3.2059	1.50266	0.936257
ENSMUSG00000028251	Tstd3	0.00062044	0.0314295	-0.195777	0.0572025	5.4343	0.0389712	0.00489868	0.00731726	0.00480117	0.00731726	0.873103	3.2073	1.50266	0.873103
ENSMUSG00000034192	Lsm3	0.000619388	0.0314295	-0.145549	0.0425211	6.82173	0.0199698	0.00121243	0.00553759	0.00252696	0.00553759	0.904035	3.20804	1.50266	0.904035
ENSMUSG00000026683	Nuf2	0.000626597	0.031536	-0.0947002	0.0276915	7.44841	0.0129249	0.000637463	0.0017081	0.00222532	0.00222532	0.936467	3.20301	1.50119	0.936467
ENSMUSG00000036887	C1qa	0.000629514	0.0315454	0.517316	0.151325	3.16323	0.130374	0.0534648	-0.00372331	0.0320261	0.0320261	1.43129	3.20099	1.50106	1.43129
ENSMUSG00000040824	Snrpd2	0.000630867	0.0315454	-0.121319	0.0354944	7.5507	0.0172869	0.000473654	0.0042298	0.00219866	0.0042298	0.919346	3.20006	1.50106	0.919346
ENSMUSG00000038658	Ric1	0.000649177	0.0323562	0.113765	0.0333603	7.22641	0.00759927	0.00107715	0.00307772	0.00230415	0.00307772	1.08205	3.18764	1.49004	1.08205
ENSMUSG00000049751	Rpl36al	0.000658969	0.0327387	-0.126882	0.0372514	8.19527	0.0162934	0.000530874	0.00464976	0.00216287	0.00464976	0.915808	3.18113	1.48494	0.915808
ENSMUSG00000046432	Bex3	0.000663398	0.0328531	-0.0884967	0.0259957	8.01781	0.0119045	0.000372541	0.00157735	0.00215037	0.00215037	0.940502	3.17823	1.48342	0.940502
ENSMUSG00000004698	Hdac9	0.000672427	0.0331938	0.252886	0.0743656	5.19189	0.0397323	0.00406394	0.0165823	0.0056775	0.0165823	1.19159	3.17235	1.47894	1.19159
ENSMUSG00000022863	Btg3	0.000695317	0.0342145	0.354417	0.104504	5.20869	0.0652715	0.0351625	0.00161065	0.0056095	0.0056095	1.27847	3.15782	1.46579	1.27847
ENSMUSG00000023051	Tarbp2	0.000697777	0.0342265	-0.114509	0.033774	6.4506	0.00786356	0.00140623	0.0005571	0.00285232	0.00285232	0.923697	3.15628	1.46564	0.923697
ENSMUSG00000068744	Psrc1	0.000712904	0.0348578	-0.113426	0.0335128	6.47985	0.00883844	0.00136977	0.00138879	0.00282316	0.00282316	0.92439	3.14697	1.4577	0.92439
ENSMUSG00000022194	Pabpn1	0.000717953	0.0348839	-0.0863846	0.0255377	8.3082	0.00389718	0.000255051	0.00162042	0.00217973	0.00217973	0.94188	3.1439	1.45737	0.94188
ENSMUSG00000021115	Vrk1	0.000717513	0.0348839	-0.0971781	0.0287271	7.22066	0.0108415	0.000774362	0.00213305	0.00230656	0.00230656	0.93486	3.14417	1.45737	0.93486
ENSMUSG00000031383	Dusp9	0.000727913	0.03515	-0.260644	0.0771399	7.57024	0.0867996	0.000514304	0.0217011	0.00219424	0.0217011	0.834715	3.13792	1.45408	0.834715
ENSMUSG00000037278	Tmem97	0.000727978	0.03515	-0.152355	0.0450912	6.24231	0.0134091	0.00188555	0.00570512	0.00308789	0.00570512	0.899781	3.13788	1.45408	0.899781
ENSMUSG00000095315	Gm10130	0.000742374	0.0357334	0.225573	0.0668676	4.54575	0.0243106	0.00725685	0.00182771	0.0094359	0.0094359	1.16924	3.12938	1.44693	1.16924
ENSMUSG00000003273	Car11	0.000758242	0.0360328	0.363255	0.107867	3.7143	0.0955191	0.0239412	0.00263593	0.0194976	0.0194976	1.28632	3.12019	1.4433	1.28632
ENSMUSG00000039985	Sinhcaf	0.000755329	0.0360328	-0.112388	0.0333627	6.86846	0.0197144	0.00166067	0.00177378	0.0024948	0.0024948	0.925056	3.12186	1.4433	0.925056
ENSMUSG00000024132	Eci1	0.000760253	0.0360328	-0.171799	0.0510262	5.55541	0.0151941	0.00528273	0.00203629	0.00443766	0.00443766	0.887735	3.11904	1.4433	0.887735
ENSMUSG00000024986	Hhex	0.000752854	0.0360328	0.314332	0.0932856	4.11434	0.123227	0.0188615	-0.00593167	0.0136267	0.0136267	1.24344	3.12329	1.4433	1.24344
ENSMUSG00000042328	Hps4	0.0007576	0.0360328	0.215112	0.0638725	5.28471	0.0272129	0.00887915	0.00635173	0.00531613	0.00635173	1.16079	3.12056	1.4433	1.16079
ENSMUSG00000024217	Snrpc	0.000769175	0.0361232	-0.094972	0.0282347	7.53442	0.0110395	0.000773708	0.00168834	0.00220251	0.00220251	0.93629	3.11397	1.44221	0.93629
ENSMUSG00000074506	Gm10705	0.000767658	0.0361232	-0.256668	0.0762939	5.32091	0.0600627	0.0165466	-0.000472459	0.00518425	0.00518425	0.837019	3.11483	1.44221	0.837019
ENSMUSG00000039989	Cbx4	0.00076623	0.0361232	-0.377604	0.112225	5.93868	0.0770444	0.00745595	0.0395631	0.00356523	0.0395631	0.769715	3.11564	1.44221	0.769715
ENSMUSG00000034487	Poglut3	0.00078676	0.0366528	0.189816	0.0565363	5.32388	0.0224158	0.00623396	0.0056991	0.00517364	0.0056991	1.14062	3.10416	1.43589	1.14062
ENSMUSG00000020133	2310011J03Rik	0.00078757	0.0366528	-0.130771	0.0389532	6.05017	0.013013	0.00229228	0.00259376	0.00337251	0.00337251	0.913343	3.10371	1.43589	0.913343
ENSMUSG00000057322	Rpl38	0.000786892	0.0366528	-0.120822	0.0359873	7.73711	0.0231457	0.00042789	0.00440709	0.00216516	0.00440709	0.919663	3.10409	1.43589	0.919663
ENSMUSG00000020720	Psmd12	0.000803819	0.0372967	-0.0984336	0.0293702	7.67277	0.0079287	0.000488973	0.00273144	0.00217455	0.00273144	0.934047	3.09484	1.42833	0.934047
ENSMUSG00000023845	Lnpep	0.000819387	0.0379052	0.164374	0.0491232	5.77935	0.0292997	0.0023241	0.00668477	0.00388053	0.00668477	1.12068	3.08651	1.4213	1.12068
ENSMUSG00000032586	Traip	0.000843075	0.0385618	-0.199203	0.0596729	5.34932	0.023288	0.00573174	0.00756211	0.00508409	0.00756211	0.871032	3.07413	1.41384	0.871032
ENSMUSG00000007670	Khsrp	0.000843998	0.0385618	0.10269	0.0307643	6.96546	0.0074718	0.000324832	0.00320855	0.00243402	0.00320855	1.07377	3.07366	1.41384	1.07377
ENSMUSG00000002984	Tomm40	0.000839564	0.0385618	-0.114547	0.0343016	6.98917	0.014091	0.000838677	0.00355397	0.00242031	0.00355397	0.923672	3.07595	1.41384	0.923672
ENSMUSG00000075467	Dnlz	0.000839651	0.0385618	-0.118128	0.0353742	6.37873	0.00910086	0.0017443	0.00119289	0.00292734	0.00292734	0.921383	3.0759	1.41384	0.921383
ENSMUSG00000038880	Mrps34	0.000846059	0.0385618	-0.138394	0.0414693	5.93412	0.0133309	0.0028467	-0.00122733	0.00357354	0.00357354	0.90853	3.0726	1.41384	0.90853
ENSMUSG00000027469	Tpx2	0.000854558	0.0388347	-0.0893444	0.026794	8.51171	0.0106688	0.000452172	0.0012162	0.00222806	0.00222806	0.93995	3.06826	1.41078	0.93995
ENSMUSG00000041695	Kcnj2	0.000871562	0.0394912	0.418692	0.125771	6.57299	0.17194	0.00144896	0.057606	0.00273414	0.057606	1.33671	3.0597	1.4035	1.33671
ENSMUSG00000038042	Ptpdc1	0.000875693	0.0395624	0.160535	0.0482421	6.09002	0.0376967	0.00357352	0.00511508	0.00330787	0.00511508	1.1177	3.05765	1.40272	1.1177
ENSMUSG00000002379	Ndufa11	0.000886936	0.0399535	-0.162692	0.0489427	6.15316	0.0166349	0.00208597	0.00685681	0.00321046	0.00685681	0.893356	3.05211	1.39845	0.893356
ENSMUSG00000036992	Nxt1	0.000895627	0.0401344	-0.117993	0.0355249	6.47644	0.0106091	0.001885	0.00239803	0.00282653	0.00282653	0.921469	3.04787	1.39648	0.921469
ENSMUSG00000038526	Car14	0.000896147	0.0401344	-0.16035	0.0482799	6.19775	0.0242507	0.0013466	0.00735562	0.00314709	0.00735562	0.894808	3.04762	1.39648	0.894808
ENSMUSG00000049517	Rps23	0.000916061	0.0407898	-0.11151	0.0336368	7.97157	0.0144503	0.000501535	0.00372249	0.00214989	0.00372249	0.925619	3.03808	1.38945	0.925619
ENSMUSG00000035356	Nfkbiz	0.000915908	0.0407898	0.211041	0.0636594	4.93223	0.0227756	0.00823507	0.0020196	0.00689432	0.00689432	1.15752	3.03815	1.38945	1.15752
ENSMUSG00000034263	Ints14	0.000922175	0.040944	-0.096339	0.0290769	7.23526	0.00865142	0.000855931	0.00146532	0.00230047	0.00230047	0.935404	3.03519	1.38781	0.935404
ENSMUSG00000012017	Scarf2	0.000928659	0.0411138	0.151702	0.0458134	7.59556	0.0311608	0.000694043	0.00714172	0.00218884	0.00714172	1.11088	3.03214	1.38601	1.11088
ENSMUSG00000117975	Itprip	0.000937722	0.0413964	-0.135095	0.0408319	5.78019	0.0182912	0.00234566	0.00324532	0.00387872	0.00387872	0.91061	3.02793	1.38304	0.91061
ENSMUSG00000068523	Gng5	0.000951546	0.041887	-0.122887	0.0371881	7.3364	0.0133235	0.0006811	0.00448193	0.00226146	0.00448193	0.918348	3.02157	1.37792	0.918348
ENSMUSG00000062248	Cks2	0.000959784	0.0421296	-0.0958775	0.0290357	7.20045	0.0141423	0.000832279	0.00145695	0.00231519	0.00231519	0.935703	3.01783	1.37541	0.935703
ENSMUSG00000063171	Rps4l	0.000969794	0.0422837	-0.161501	0.0489524	6.57391	0.0249515	0.0012895	0.00765681	0.00273328	0.00765681	0.894094	3.01332	1.37383	0.894094
ENSMUSG00000033938	Ndufb7	0.000976979	0.0422837	-0.132135	0.0400764	8.31017	0.0173434	0.00150785	0.00448833	0.00218009	0.00448833	0.91248	3.01011	1.37383	0.91248
ENSMUSG00000022228	Zscan26	0.000973951	0.0422837	0.0975689	0.0295848	7.09323	0.00937917	0.000902713	0.00133165	0.00236492	0.00236492	1.06997	3.01146	1.37383	1.06997
ENSMUSG00000052137	Rbm12b2	0.000975471	0.0422837	0.116751	0.0354059	6.55034	0.0251175	0.00192466	0.00104759	0.00275536	0.00275536	1.08429	3.01079	1.37383	1.08429
ENSMUSG00000026459	Myog	0.000971901	0.0422837	1.09468	0.331868	2.49956	4.48293	0.151554	0.259623	0.0555667	0.259623	2.13566	3.01238	1.37383	2.13566
ENSMUSG00000032397	Tipin	0.000986086	0.0425587	-0.130515	0.0396164	5.93533	0.0166568	0.00228799	0.00159088	0.00357133	0.00357133	0.913505	3.00609	1.37101	0.913505
ENSMUSG00000021273	Fdft1	0.000997811	0.0427838	-0.136927	0.0416046	7.35205	0.0160416	0.00109516	0.00536702	0.00225597	0.00536702	0.909454	3.00095	1.36872	0.909454
ENSMUSG00000001288	Rarg	0.000998526	0.0427838	0.121318	0.0368643	5.67845	0.0243498	0.00096108	0.00227593	0.00411244	0.00411244	1.08773	3.00064	1.36872	1.08773
ENSMUSG00000025153	Fasn	0.000999607	0.0427838	-0.161085	0.0489524	6.51112	0.0143734	0.00121648	0.00772984	0.0027927	0.00772984	0.894353	3.00017	1.36872	0.894353
ENSMUSG00000026857	Ntmt1	0.00102114	0.0435847	-0.145484	0.0442922	5.71472	0.016541	0.00197848	0.00534556	0.00402572	0.00534556	0.904076	2.99091	1.36067	0.904076
ENSMUSG00000020528	Prpsap2	0.00103571	0.0440847	-0.127854	0.0389721	6.44406	0.0112103	0.00281134	0.000649394	0.00285894	0.00285894	0.915192	2.98476	1.35571	0.915192
ENSMUSG00000030037	Mrpl53	0.00105618	0.0448326	-0.133884	0.040879	5.95439	0.0198529	0.00270187	0.00256524	0.00353689	0.00353689	0.911375	2.97626	1.34841	0.911375
ENSMUSG00000063316	Rpl27	0.00106196	0.0449546	-0.187163	0.057174	8.24623	0.0337839	0.000471972	0.0117318	0.00216961	0.0117318	0.878331	2.97389	1.34723	0.878331
ENSMUSG00000112825	Gm9118	0.00109825	0.0463635	0.346924	0.106286	3.8167	0.0799069	0.0233517	0.0188225	0.0177684	0.0188225	1.27185	2.9593	1.33382	1.27185
ENSMUSG00000022016	Akap11	0.00110411	0.0464838	-0.137358	0.0421013	6.35854	0.0102302	0.00366681	0.00295059	0.00294944	0.00295059	0.909183	2.95699	1.3327	0.909183
ENSMUSG00000003154	Foxj2	0.00111457	0.0467968	0.178843	0.0548617	5.88028	0.0291132	0.00593405	0.00530254	0.00367459	0.00530254	1.13198	2.95289	1.32978	1.13198
ENSMUSG00000007783	Cpt1c	0.00112715	0.0471967	0.365422	0.112206	5.37412	0.130333	0.00945244	0.0375511	0.00499899	0.0375511	1.28826	2.94802	1.32609	1.28826
ENSMUSG00000037266	Rsrp1	0.00113999	0.047468	0.127659	0.0392375	7.06903	0.0185995	0.00063436	0.0051134	0.00237713	0.0051134	1.09252	2.9431	1.3236	1.09252
ENSMUSG00000033735	Spr	0.00114284	0.047468	-0.113314	0.0348362	6.34577	0.0103673	0.00156694	0.0018522	0.00296368	0.00296368	0.924462	2.94201	1.3236	0.924462
ENSMUSG00000079364	Gm3558	0.0011422	0.047468	-0.127324	0.0391414	6.42352	0.022228	0.00239043	0.00332923	0.00287998	0.00332923	0.915528	2.94226	1.3236	0.915528
ENSMUSG00000074886	Grk6	0.00114644	0.0474897	-0.0870148	0.0267583	7.87405	0.00691571	0.000520445	0.000885625	0.00215265	0.00215265	0.941469	2.94065	1.3234	0.941469
ENSMUSG00000039680	Mrps6	0.00117711	0.0486296	-0.127977	0.0394459	6.08041	0.0111925	0.00248571	0.00282649	0.00332328	0.00332328	0.915114	2.92918	1.3131	0.915114
ENSMUSG00000030751	Psma1	0.00119377	0.0491819	-0.104704	0.0323125	7.58904	0.0103083	0.000387405	0.00351055	0.0021902	0.00351055	0.929996	2.92308	1.30819	0.929996
ENSMUSG00000078532	Nkain1	0.00119829	0.0491819	-0.127679	0.0394158	6.46315	0.00871551	0.00296039	-0.000197835	0.00283973	0.00283973	0.915303	2.92144	1.30819	0.915303
ENSMUSG00000020171	Yeats4	0.00120616	0.0491819	-0.0916079	0.0282966	7.4333	0.00813727	0.000759498	0.0018984	0.00222977	0.00222977	0.938476	2.91859	1.30819	0.938476
ENSMUSG00000038893	Fam117a	0.00120639	0.0491819	0.214904	0.0663825	4.29429	0.02226	0.00477706	0.00515698	0.0116744	0.0116744	1.16063	2.91851	1.30819	1.16063
ENSMUSG00000020430	Pes1	0.00120571	0.0491819	-0.162414	0.050166	7.60237	0.0190588	0.00318166	0.00621375	0.00218745	0.00621375	0.893529	2.91876	1.30819	0.893529
ENSMUSG00000027715	Ccna2	0.00121364	0.0493473	-0.0830173	0.025657	7.9468	0.00640226	0.000307485	0.00122337	0.00215011	0.00215011	0.944081	2.91591	1.30674	0.944081
ENSMUSG00000041949	Tango6	0.00122585	0.0497131	-0.131957	0.0408183	5.95291	0.0168854	0.00268069	0.000117517	0.00353954	0.00353954	0.912593	2.91156	1.30353	0.912593
ENSMUSG00000001642	Akr1b3	0.00124676	0.0504284	-0.120473	0.0373216	6.95811	0.0120876	0.000732477	0.00446768	0.00243836	0.00446768	0.919886	2.90422	1.29732	0.919886
ENSMUSG00000036699	Zcchc12	0.00125651	0.0506901	0.25629	0.0794516	4.75308	0.117395	0.00971059	0.0138563	0.00795085	0.0138563	1.1944	2.90083	1.29508	1.1944
ENSMUSG00000022124	Fbxl3	0.00126198	0.050697	0.145996	0.0452772	5.70769	0.00797519	0.0036112	-0.000813668	0.00404221	0.00404221	1.10649	2.89895	1.29502	1.10649
ENSMUSG00000000751	Rpa1	0.00126324	0.050697	-0.088663	0.0274992	8.16115	0.0070932	0.000664024	0.00126737	0.00215915	0.00215915	0.940394	2.89851	1.29502	0.940394
ENSMUSG00000004885	Crabp2	0.00126763	0.0507412	-0.144626	0.0448702	7.95074	0.0780305	0.000347429	0.00716901	0.00215005	0.00716901	0.904614	2.89701	1.29464	0.904614
ENSMUSG00000034563	Ccpg1	0.00131587	0.0525361	0.176502	0.0549423	5.84168	0.0307097	0.00751902	-0.000479595	0.00375062	0.00375062	1.13014	2.88079	1.27954	1.13014
ENSMUSG00000021095	Gsc	0.00132076	0.0525956	0.259194	0.0807098	6.41687	0.443151	0.00197594	0.0223433	0.00288688	0.0223433	1.19681	2.87918	1.27905	1.19681
ENSMUSG00000078249	Hmga1b	0.00133265	0.0529327	-0.147669	0.0460193	8.32094	0.0337971	0.000197043	0.00770932	0.00218207	0.00770932	0.902708	2.87528	1.27628	0.902708
ENSMUSG00000059518	Znhit1	0.00134012	0.0530926	-0.133308	0.0415646	5.96572	0.011608	0.00293307	0.00330331	0.0035167	0.0035167	0.911739	2.87286	1.27497	0.911739
ENSMUSG00000039041	Adrm1	0.00134868	0.053195	-0.0910612	0.0284086	7.43312	0.010834	0.000783149	0.00218326	0.00222982	0.00222982	0.938832	2.87009	1.27413	0.938832
ENSMUSG00000026034	Clk1	0.00135303	0.053195	0.171942	0.0536567	7.07832	0.0203534	0.00100047	0.00974797	0.0023724	0.00974797	1.12657	2.86869	1.27413	1.12657
ENSMUSG00000049502	Dtx3l	0.00135047	0.053195	0.20628	0.0643614	4.7494	0.06698	0.00749029	-0.00227764	0.00797464	0.00797464	1.15371	2.86952	1.27413	1.15371
ENSMUSG00000028195	Ccn1	0.0013615	0.0533876	-0.426586	0.133196	5.93718	0.112732	0.0027331	0.0635008	0.00356796	0.0635008	0.74402	2.86598	1.27256	0.74402
ENSMUSG00000017778	Cox7c	0.00136484	0.0533876	-0.117827	0.0367982	7.36063	0.0235786	0.000718965	0.00433638	0.00225302	0.00433638	0.921574	2.86492	1.27256	0.921574
ENSMUSG00000098019	Gm2546	0.0013857	0.0538243	0.292323	0.0914192	4.63023	0.064187	0.0146566	0.0165446	0.00879437	0.0165446	1.22461	2.85833	1.26902	1.22461
ENSMUSG00000015289	Lage3	0.00139342	0.0538243	-0.147357	0.0461067	6.13031	0.0135054	0.00230012	0.00563629	0.00324469	0.00563629	0.902903	2.85592	1.26902	0.902903
ENSMUSG00000025034	Trim8	0.00139038	0.0538243	0.108457	0.0339283	6.23554	0.0183833	0.00120092	0.00148568	0.00309664	0.00309664	1.07807	2.85687	1.26902	1.07807
ENSMUSG00000046079	Lrrc8d	0.00138876	0.0538243	-0.108989	0.0340913	6.03441	0.00896357	0.000940313	0.00141928	0.00339864	0.00339864	0.927237	2.85737	1.26902	0.927237
ENSMUSG00000028873	Cdca8	0.00138669	0.0538243	-0.0911018	0.0284924	7.16678	0.0165511	0.000700716	0.00117591	0.00233007	0.00233007	0.938806	2.85802	1.26902	0.938806
ENSMUSG00000022856	Tmem41a	0.00139842	0.0538826	-0.162416	0.0508347	5.40524	0.021059	0.00475237	0.000787809	0.0048952	0.0048952	0.893528	2.85436	1.26855	0.893528
ENSMUSG00000051048	P4ha3	0.00141337	0.0543232	0.702412	0.22006	4.73755	1.278	0.0150019	0.16579	0.00805183	0.16579	1.62722	2.84974	1.26501	1.62722
ENSMUSG00000078193	Gm2000	0.00142379	0.054454	0.404934	0.126947	5.73972	0.0910585	0.0115836	0.0485814	0.00396819	0.0485814	1.32403	2.84656	1.26397	1.32403
ENSMUSG00000028622	Mrpl37	0.00142382	0.054454	-0.099558	0.0312116	6.56918	0.0071022	0.000899183	0.000302676	0.00273769	0.00273769	0.933319	2.84655	1.26397	0.933319
ENSMUSG00000024181	Mrpl28	0.00143657	0.0548059	-0.105321	0.033045	6.91761	0.0156553	0.00123749	0.0028392	0.00246304	0.0028392	0.929598	2.84267	1.26117	0.929598
ENSMUSG00000049932	H2ax	0.00144894	0.0551417	-0.0818696	0.025707	8.71087	0.00530719	0.000168495	0.00133069	0.00229867	0.00229867	0.944832	2.83895	1.25852	0.944832
ENSMUSG00000051495	Irf2bp2	0.0014622	0.0555099	0.184098	0.0578545	7.00453	0.0197341	0.00088502	0.011611	0.00241165	0.011611	1.13611	2.83499	1.25563	1.13611
ENSMUSG00000004530	Coro1c	0.00151075	0.0572121	-0.142118	0.0447952	6.03337	0.0112963	0.00297417	0.00451719	0.00340038	0.00451719	0.906188	2.82081	1.24251	0.906188
ENSMUSG00000038482	Tfdp1	0.0015159	0.0572669	-0.104592	0.0329775	7.81157	0.00699786	0.000578052	0.00348201	0.0021571	0.00348201	0.930068	2.81933	1.2421	0.930068
ENSMUSG00000093985	Gm10406	0.001535	0.057847	-0.217266	0.0685818	5.73227	0.0432038	0.00650637	0.0110532	0.00398515	0.0110532	0.860194	2.81389	1.23772	0.860194
ENSMUSG00000029177	Cenpa	0.00154651	0.0581391	-0.0892057	0.0281778	7.7595	0.0150017	0.000801811	0.00154274	0.00216242	0.00216242	0.94004	2.81065	1.23553	0.94004
ENSMUSG00000026356	Dars	0.00156658	0.0584582	-0.092873	0.029371	7.50192	0.00768865	0.000564041	0.00265655	0.00221063	0.00265655	0.937654	2.80505	1.23315	0.937654
ENSMUSG00000007892	Rplp1	0.00157013	0.0584582	-0.111284	0.0352009	9.44539	0.0208775	8.69835e-05	0.00453899	0.00279108	0.00453899	0.925764	2.80406	1.23315	0.925764
ENSMUSG00000048371	Pdp2	0.00156801	0.0584582	-0.111566	0.0352856	6.44057	0.00677411	0.0017858	0.0025586	0.00286249	0.00286249	0.925583	2.80465	1.23315	0.925583
ENSMUSG00000027671	Actl6a	0.00156945	0.0584582	-0.0894444	0.0282915	6.96831	0.0082954	0.000555848	0.00121926	0.00243235	0.00243235	0.939885	2.80425	1.23315	0.939885
ENSMUSG00000045498	Pcdhb3	0.00158399	0.0588325	0.4387	0.13888	3.42038	0.171873	0.0328246	0.0391829	0.0254571	0.0391829	1.35538	2.80025	1.23038	1.35538
ENSMUSG00000071528	Atp5md	0.0015947	0.0590882	-0.132661	0.042023	7.2046	0.0188377	0.000921459	0.00567137	0.0023134	0.00567137	0.912147	2.79732	1.2285	0.912147
ENSMUSG00000030222	Rerg	0.00160622	0.0592718	0.236179	0.074864	4.14899	0.620989	0.00770186	0.0125522	0.013222	0.013222	1.17787	2.79419	1.22715	1.17787
ENSMUSG00000039771	Polr2j	0.00160733	0.0592718	-0.142405	0.0451425	6.32966	0.0205509	0.00174265	0.00586529	0.00298197	0.00586529	0.906007	2.79389	1.22715	0.906007
ENSMUSG00000028609	Magoh	0.00162533	0.0597046	-0.103684	0.0329018	6.96272	0.0139951	0.000742586	0.00329885	0.00243564	0.00329885	0.930653	2.78906	1.22399	0.930653
ENSMUSG00000028047	Thbs3	0.0016268	0.0597046	0.220348	0.0699282	5.38787	0.0768114	0.0133031	-0.000923412	0.00495274	0.00495274	1.16501	2.78867	1.22399	1.16501
ENSMUSG00000022389	Tef	0.00163793	0.0599706	0.212126	0.0673615	4.22702	0.031195	0.00457634	0.00333812	0.0123639	0.0123639	1.15839	2.78571	1.22206	1.15839
ENSMUSG00000027560	Dok5	0.00167032	0.0610121	-0.231835	0.0737543	4.97754	0.0824243	0.00708357	0.0132246	0.00665714	0.0132246	0.851551	2.7772	1.21458	0.851551
ENSMUSG00000026496	Parp1	0.00169039	0.0611085	-0.0970354	0.0309046	6.71058	0.0112049	0.000953831	0.00234675	0.00261185	0.00261185	0.934952	2.77201	1.2139	0.934952
ENSMUSG00000004264	Phb2	0.00169455	0.0611085	-0.0883627	0.0281489	7.45985	0.0137537	0.000237322	0.00272082	0.00222204	0.00272082	0.94059	2.77095	1.2139	0.94059
ENSMUSG00000025574	Tk1	0.00169669	0.0611085	-0.107124	0.0341294	6.50332	0.0174606	0.00154841	0.00214116	0.00280024	0.00280024	0.928437	2.7704	1.2139	0.928437
ENSMUSG00000028708	Mknk1	0.00169573	0.0611085	0.237915	0.0757952	4.60873	0.0314261	0.012495	-0.00345133	0.00895272	0.00895272	1.17929	2.77064	1.2139	1.17929
ENSMUSG00000024571	Gm16286	0.00168678	0.0611085	-0.0858523	0.0273374	7.61498	0.00685473	0.00060511	0.0020619	0.00218494	0.00218494	0.942228	2.77294	1.2139	0.942228
ENSMUSG00000031600	Vps37a	0.00168	0.0611085	0.158364	0.0504078	6.50296	0.036472	0.00265486	0.00683135	0.00280059	0.00683135	1.11602	2.77469	1.2139	1.11602
ENSMUSG00000020250	Txnrd1	0.00171707	0.0616986	-0.08225	0.0262339	8.6566	0.0107875	0.000201721	0.00236763	0.00227706	0.00236763	0.944583	2.76521	1.20972	0.944583
ENSMUSG00000028729	Ebna1bp2	0.00174987	0.0627315	-0.122666	0.0391941	6.66517	0.0166326	0.00173111	0.00400396	0.00265023	0.00400396	0.918489	2.75699	1.20251	0.918489
ENSMUSG00000022911	Arl13b	0.001765	0.0631272	0.186344	0.0595888	5.92433	0.0213092	0.00763887	0.00561756	0.00359151	0.00561756	1.13788	2.75326	1.19978	1.13788
ENSMUSG00000048355	Arxes1	0.00178128	0.0632891	-0.135507	0.0433698	5.9902	0.0121708	0.00324177	0.0037804	0.0034738	0.0037804	0.91035	2.74927	1.19867	0.91035
ENSMUSG00000037410	Tbc1d2b	0.00177976	0.0632891	0.145066	0.0464252	5.72877	0.0151046	0.00254921	0.00549724	0.00399318	0.00549724	1.10578	2.74964	1.19867	1.10578
ENSMUSG00000052144	Ppp4r2	0.00178181	0.0632891	0.101665	0.0325393	7.57203	0.00748526	0.00143574	0.00251713	0.00219385	0.00251713	1.07301	2.74914	1.19867	1.07301
ENSMUSG00000029203	Ube2k	0.0017924	0.0635194	-0.094152	0.0301515	7.59396	0.00695261	0.00120485	0.00116248	0.00218917	0.00218917	0.936823	2.74656	1.19709	0.936823
ENSMUSG00000078941	Ak6	0.0018008	0.063671	-0.0898929	0.0288002	7.59235	0.00875585	0.000644292	0.00245233	0.00218951	0.00245233	0.939592	2.74453	1.19606	0.939592
ENSMUSG00000000957	Mmp14	0.00180988	0.0637003	0.12396	0.0397336	6.18328	0.0217862	0.000828211	0.00506582	0.00316718	0.00506582	1.08972	2.74235	1.19586	1.08972
ENSMUSG00000051335	Gfod1	0.00180707	0.0637003	0.277941	0.0890769	3.95764	0.095906	0.0102017	0.0194212	0.015652	0.0194212	1.21246	2.74303	1.19586	1.21246
ENSMUSG00000031060	Rbm10	0.00183573	0.0644635	-0.0815121	0.0261626	7.80716	0.00309559	0.000397909	0.000333614	0.00215749	0.00215749	0.945067	2.73619	1.19069	0.945067
ENSMUSG00000075376	Rc3h2	0.00185251	0.0647582	0.145627	0.0467816	6.65945	0.0150713	0.00171048	0.00645998	0.00265523	0.00645998	1.10621	2.73224	1.18871	1.10621
ENSMUSG00000025613	Cct8	0.00185091	0.0647582	-0.0791586	0.025427	7.75483	0.00935462	0.000250761	0.00129478	0.00216297	0.00216297	0.94661	2.73261	1.18871	0.94661
ENSMUSG00000029209	Gnpda2	0.00185894	0.0648363	0.186143	0.0598167	5.49052	0.0207988	0.0061171	0.00724091	0.00462692	0.00724091	1.13772	2.73073	1.18818	1.13772
ENSMUSG00000044573	Acp1	0.00187775	0.0652212	-0.113326	0.0364519	5.87613	0.00855019	0.00127803	-0.000215636	0.00368261	0.00368261	0.924454	2.72636	1.18561	0.924454
ENSMUSG00000067995	Gtf2f2	0.00188264	0.0652212	-0.111379	0.0358347	6.33273	0.0146233	0.00181562	0.00130994	0.00297845	0.00297845	0.925703	2.72523	1.18561	0.925703
ENSMUSG00000008575	Nfib	0.00188005	0.0652212	0.261228	0.0840351	6.39124	0.0829891	0.00149452	0.0248699	0.0029139	0.0248699	1.1985	2.72583	1.18561	1.1985
ENSMUSG00000032171	Pin1	0.00189395	0.0654661	-0.0921825	0.0296752	7.02193	0.011254	0.000885601	0.00174034	0.00240204	0.00240204	0.938103	2.72263	1.18398	0.938103
ENSMUSG00000058600	Rpl30	0.00190517	0.0656245	0.103065	0.0331973	7.15384	0.0144214	0.00151544	0.00259892	0.00233596	0.00259892	1.07405	2.72007	1.18293	1.07405
ENSMUSG00000031340	Gabre	0.00191127	0.0656245	0.294424	0.0948628	4.02969	0.0753205	0.0129718	0.0206243	0.0146801	0.0206243	1.2264	2.71868	1.18293	1.2264
ENSMUSG00000030842	Lamtor1	0.00191057	0.0656245	-0.0995095	0.0320606	6.79873	0.00640061	0.00129389	0.0014772	0.00254353	0.00254353	0.93335	2.71884	1.18293	0.93335
ENSMUSG00000020948	Klhl28	0.00192193	0.0658442	0.173382	0.0558929	5.03366	0.0288739	0.00429663	0.00736636	0.00637896	0.00736636	1.1277	2.71626	1.18148	1.1277
ENSMUSG00000025316	Banp	0.00192638	0.0658507	0.210468	0.0678632	5.21913	0.0353158	0.00659275	0.0106008	0.00556788	0.0106008	1.15706	2.71526	1.18144	1.15706
ENSMUSG00000032366	Tpm1	0.00194185	0.065942	-0.183404	0.059182	8.28206	0.0214588	0.000299174	0.0127769	0.00217521	0.0127769	0.880623	2.71178	1.18084	0.880623
ENSMUSG00000020086	Macroh2a2	0.00193658	0.065942	-0.0808209	0.026073	8.91085	0.00454447	0.000143529	0.00145852	0.0023944	0.0023944	0.945519	2.71296	1.18084	0.945519
ENSMUSG00000023191	P3h3	0.00193968	0.065942	0.162701	0.0524957	6.10972	0.0586629	0.00253254	0.00775576	0.00327662	0.00775576	1.11938	2.71227	1.18084	1.11938
ENSMUSG00000053965	Pde5a	0.00194741	0.0659597	0.102369	0.0330422	6.37896	0.0528363	0.00114891	0.00175753	0.0029271	0.0029271	1.07354	2.71054	1.18072	1.07354
ENSMUSG00000027109	Sp3	0.00195091	0.0659597	0.0823668	0.0265905	8.24639	0.00443744	0.000470029	0.00039289	0.00216964	0.00216964	1.05875	2.70976	1.18072	1.05875
ENSMUSG00000041164	Zmiz2	0.00197285	0.0663212	-0.0844815	0.0273024	7.65607	0.00504727	0.00060554	0.00193204	0.00217737	0.00217737	0.943123	2.70491	1.17835	0.943123
ENSMUSG00000030677	Kif22	0.00197449	0.0663212	-0.0972621	0.0314353	6.29602	0.0149578	0.000667872	0.00202116	0.00302132	0.00302132	0.934805	2.70455	1.17835	0.934805
ENSMUSG00000002274	Metrn	0.00196601	0.0663212	-0.287362	0.0928377	6.46891	0.109954	0.00206515	0.0301119	0.00283399	0.0301119	0.819399	2.70641	1.17835	0.819399
ENSMUSG00000041220	Elovl6	0.00198028	0.0663716	-0.0878159	0.0283902	6.9479	0.015336	0.000564629	0.00199472	0.00244446	0.00244446	0.940946	2.70327	1.17802	0.940946
ENSMUSG00000070802	Pnmal2	0.00198991	0.06655	0.208718	0.0675084	5.7753	0.0328394	0.00321954	0.0137947	0.0038893	0.0137947	1.15566	2.70117	1.17685	1.15566
ENSMUSG00000091625	Lsm5	0.00199547	0.0665898	-0.109226	0.0353377	6.24883	0.0191917	0.00158248	0.00148459	0.00307954	0.00307954	0.927086	2.69996	1.17659	0.927086
ENSMUSG00000025917	Cops5	0.00199972	0.0665898	-0.0958739	0.0310244	6.83272	0.010744	0.000781151	0.00281223	0.00251922	0.00281223	0.935705	2.69903	1.17659	0.935705
ENSMUSG00000037740	Mrps26	0.00201541	0.0669679	-0.110245	0.0357018	7.13675	0.0067963	0.00241468	0.00148035	0.00234389	0.00234389	0.92643	2.69564	1.17413	0.92643
ENSMUSG00000037373	Ctbp1	0.00203375	0.0672881	-0.0853896	0.0276767	7.63456	0.00565262	0.000678513	0.00134381	0.00218121	0.00218121	0.94253	2.6917	1.17206	0.94253
ENSMUSG00000042650	Alkbh5	0.00203034	0.0672881	0.0813881	0.0263754	7.44034	0.00630962	0.000369459	0.00175723	0.00222768	0.00222768	1.05804	2.69243	1.17206	1.05804
ENSMUSG00000026622	Nek2	0.00207613	0.0683971	-0.104395	0.0339041	6.24607	0.0349266	0.00120836	0.0027614	0.00308306	0.00308306	0.930195	2.68275	1.16496	0.930195
ENSMUSG00000040466	Blvrb	0.00207558	0.0683971	0.192381	0.0624778	5.06838	0.0281252	0.0083579	0.000390636	0.00621505	0.00621505	1.14265	2.68286	1.16496	1.14265
ENSMUSG00000068749	Psma5	0.00216057	0.0707371	-0.0824556	0.0268828	7.23969	0.0102171	0.000399387	0.00217974	0.00229864	0.00229864	0.944449	2.66543	1.15035	0.944449
ENSMUSG00000034424	Gcsh	0.00215438	0.0707371	-0.11742	0.0382716	6.59634	0.0116665	0.0010438	0.00442447	0.00271248	0.00442447	0.921834	2.66668	1.15035	0.921834
ENSMUSG00000031871	Cdh5	0.00216089	0.0707371	0.11494	0.0374742	6.65257	0.00820475	0.00102537	0.00421742	0.00266128	0.00421742	1.08293	2.66537	1.15035	1.08293
ENSMUSG00000045948	Mrps12	0.00219335	0.0714967	-0.163721	0.0534561	5.39375	0.0298962	0.00353601	0.00713218	0.00493316	0.00713218	0.89272	2.65889	1.14571	0.89272
ENSMUSG00000026707	Nsun6	0.0021933	0.0714967	-0.330342	0.107859	5.22559	0.0617638	0.0378894	-0.0063767	0.00554229	0.00554229	0.795348	2.6589	1.14571	0.795348
ENSMUSG00000075706	Gpx4	0.00219817	0.071503	-0.122071	0.0398657	7.14086	0.0210046	0.000836594	0.0050967	0.00234197	0.0050967	0.918867	2.65794	1.14568	0.918867
ENSMUSG00000031167	Rbm3	0.00222808	0.0721721	-0.0813416	0.0265995	9.14175	0.0100703	0.000102694	0.00248787	0.00253876	0.00253876	0.945178	2.65207	1.14163	0.945178
ENSMUSG00000053560	Ier2	0.00222401	0.0721721	-0.192107	0.0628095	7.16787	0.0525652	0.000735242	0.0139929	0.00232957	0.0139929	0.875326	2.65286	1.14163	0.875326
ENSMUSG00000028416	Bag1	0.00223543	0.0722586	-0.122155	0.0399586	7.43386	0.00867052	0.00373139	3.32653e-05	0.0022296	0.0022296	0.918814	2.65064	1.14111	0.918814
ENSMUSG00000057113	Npm1	0.00224094	0.0722856	-0.0931975	0.0304937	9.95913	0.0152479	5.42077e-05	0.00324038	0.00341728	0.00341728	0.937443	2.64957	1.14095	0.937443
ENSMUSG00000041697	Cox6a1	0.00227288	0.0729246	-0.115067	0.0377016	7.44483	0.0127622	0.000590012	0.00471659	0.00222636	0.00471659	0.923339	2.64342	1.13713	0.923339
ENSMUSG00000020680	Taf15	0.00227491	0.0729246	-0.0904748	0.0296466	7.15472	0.00865836	0.000945753	0.00144478	0.00233555	0.00233555	0.939214	2.64304	1.13713	0.939214
ENSMUSG00000030662	Ipo5	0.00227253	0.0729246	-0.0818068	0.0268035	9.03152	0.00909508	0.000101473	0.00258066	0.00246509	0.00258066	0.944874	2.64349	1.13713	0.944874
ENSMUSG00000031145	Prickle3	0.00228332	0.0730427	0.229153	0.0751156	4.7571	0.0391866	0.0131399	0.00191301	0.0079249	0.0079249	1.17215	2.64143	1.13642	1.17215
ENSMUSG00000051499	Zfp786	0.00234033	0.0747115	-0.331108	0.108801	4.56658	0.0508625	0.0349208	-0.0154024	0.00927286	0.00927286	0.794926	2.63072	1.12661	0.794926
ENSMUSG00000034205	Loxl2	0.00235187	0.0748306	0.138543	0.0455467	7.11838	0.0287444	0.00125134	0.00649347	0.00235262	0.00649347	1.10079	2.62859	1.12592	1.10079
ENSMUSG00000078713	Tomm5	0.00235374	0.0748306	-0.131574	0.0432592	6.26626	0.0208489	0.00201085	0.00497556	0.00305759	0.00497556	0.912835	2.62824	1.12592	0.912835
ENSMUSG00000020946	Gosr2	0.00236344	0.074831	-0.106382	0.0349908	6.42382	0.00802977	0.00169125	0.00239899	0.00287967	0.00287967	0.928914	2.62646	1.12592	0.928914
ENSMUSG00000096255	Dynlt1b	0.00236213	0.074831	-0.131754	0.0433336	7.56667	0.0132946	0.000682054	0.0063284	0.00219504	0.0063284	0.912721	2.6267	1.12592	0.912721
ENSMUSG00000023345	Poc1a	0.0023847	0.0753498	-0.149449	0.0491998	5.51731	0.021245	0.00448973	0.000994216	0.00454727	0.00454727	0.901594	2.62257	1.12292	0.901594
ENSMUSG00000042675	Ypel3	0.00241332	0.0759592	0.217231	0.0715988	5.6461	0.0290468	0.0115903	0.00754819	0.00419328	0.00754819	1.1625	2.61739	1.11942	1.1625
ENSMUSG00000047139	Cd24a	0.00241382	0.0759592	-0.0748327	0.0246652	7.96453	0.056284	0.000121338	0.00148758	0.00214992	0.00214992	0.949452	2.61729	1.11942	0.949452
ENSMUSG00000084291	Gm6654	0.00246518	0.0774178	0.251434	0.0830477	4.31455	0.0576356	0.014274	0.0106875	0.0114745	0.0114745	1.19039	2.60815	1.11116	1.19039
ENSMUSG00000031805	Jak3	0.00247351	0.0775218	0.182461	0.0602864	5.06401	0.0204765	0.00733323	0.00530132	0.00623539	0.00623539	1.13482	2.60669	1.11058	1.13482
ENSMUSG00000000088	Cox5a	0.00249539	0.0779502	-0.109061	0.0360663	7.27195	0.01042	0.000755909	0.00410033	0.00228564	0.00410033	0.927191	2.60286	1.10818	0.927191
ENSMUSG00000036371	Serbp1	0.00251121	0.0779502	-0.0847377	0.0280404	9.43273	0.00890818	0.000156384	0.00140095	0.002779	0.002779	0.942956	2.60012	1.10818	0.942956
ENSMUSG00000024516	Sec11c	0.00250424	0.0779502	0.266027	0.0880058	4.52472	0.0316185	0.0193109	-0.010061	0.00960385	0.00960385	1.20249	2.60132	1.10818	1.20249
ENSMUSG00000026814	Eng	0.00251241	0.0779502	0.222517	0.0736362	5.79896	0.0293346	0.0054221	0.0148211	0.00383865	0.0148211	1.16677	2.59991	1.10818	1.16677
ENSMUSG00000029147	Ppm1g	0.00250188	0.0779502	-0.0769293	0.0254471	7.918	0.00752889	0.000266758	0.00187037	0.00215077	0.00215077	0.948073	2.60173	1.10818	0.948073
ENSMUSG00000024165	Jpt2	0.002524	0.0781531	-0.0847584	0.0280615	7.75458	0.0047042	0.000776816	0.00111451	0.002163	0.002163	0.942942	2.59791	1.10705	0.942942
ENSMUSG00000033713	Foxn3	0.00254265	0.0784876	0.291611	0.0966169	4.98177	0.060732	0.0116566	0.0231933	0.00663556	0.0231933	1.22401	2.59471	1.1052	1.22401
ENSMUSG00000022053	Ebf2	0.00254497	0.0784876	0.339808	0.112596	5.92286	0.0908402	0.00290674	0.0444238	0.00359423	0.0444238	1.26559	2.59432	1.1052	1.26559
ENSMUSG00000022300	Dcaf13	0.00256348	0.0787476	-0.112229	0.0372143	7.20811	0.0115028	0.00111521	0.00405511	0.00231189	0.00405511	0.925158	2.59117	1.10376	0.925158
ENSMUSG00000029641	Rasl11a	0.00256359	0.0787476	-0.249996	0.0828973	4.55871	0.0372415	0.00978481	0.0158705	0.00933407	0.0158705	0.840899	2.59115	1.10376	0.840899
ENSMUSG00000026003	Acadl	0.00259698	0.0794572	-0.112238	0.037266	5.99272	0.0117234	0.00149425	0.00369042	0.00346944	0.00369042	0.925152	2.58553	1.09987	0.925152
ENSMUSG00000030493	Faap24	0.00259396	0.0794572	-0.253536	0.084171	5.08768	0.0376043	0.0139141	0.0125357	0.00612648	0.0125357	0.838838	2.58604	1.09987	0.838838
ENSMUSG00000049641	Vgll2	0.00260532	0.0795548	-0.928385	0.308348	2.41117	5.74968	0.0991666	0.255793	0.0594816	0.255793	0.525446	2.58414	1.09933	0.525446
ENSMUSG00000033307	Mif	0.00262216	0.0799113	-0.123045	0.0408941	8.56517	0.0305124	0.00019036	0.00605298	0.00224469	0.00605298	0.918247	2.58134	1.09739	0.918247
ENSMUSG00000028066	Pmf1	0.00263538	0.0801559	-0.097895	0.032552	6.6521	0.0105212	0.00129425	0.00121764	0.0026617	0.0026617	0.934395	2.57916	1.09606	0.934395
ENSMUSG00000056121	Fez2	0.00264403	0.080261	-0.127169	0.0423	6.09875	0.0113614	0.00211779	0.00456221	0.00329396	0.00456221	0.915627	2.57773	1.0955	0.915627
ENSMUSG00000041203	Trir	0.00267575	0.0810647	-0.100485	0.0334647	7.56559	0.0103482	0.000561402	0.00361951	0.00219528	0.00361951	0.932719	2.57255	1.09117	0.932719
ENSMUSG00000036181	H1f2	0.00268185	0.0810905	0.253909	0.0845792	4.75673	0.0700499	0.00789844	0.0188085	0.0079273	0.0188085	1.19243	2.57157	1.09103	1.19243
ENSMUSG00000038628	Polr3k	0.00271603	0.0819636	-0.095922	0.0319935	6.82327	0.00540285	0.00129551	0.00133198	0.00252587	0.00252587	0.935674	2.56607	1.08638	0.935674
ENSMUSG00000057262	Rpl15-ps6	0.00273829	0.0823139	-0.100939	0.0336949	7.91453	0.0148394	0.000856346	0.00338228	0.00215088	0.00338228	0.932426	2.56252	1.08453	0.932426
ENSMUSG00000030030	1700003E16Rik	0.00273376	0.0823139	0.46908	0.156559	2.97992	0.17294	0.0539468	0.0173734	0.0375597	0.0375597	1.38423	2.56324	1.08453	1.38423
ENSMUSG00000020954	Strn3	0.00274935	0.0824859	0.0821707	0.0274409	7.4947	0.00542845	0.000598702	0.0012962	0.00221252	0.00221252	1.05861	2.56077	1.08362	1.05861
ENSMUSG00000019737	Syne4	0.0027654	0.0826464	0.175195	0.0585411	5.13538	0.0374974	0.00687939	-0.00113496	0.00591496	0.00591496	1.12912	2.55824	1.08278	1.12912
ENSMUSG00000037601	Nme1	0.00276525	0.0826464	-0.131921	0.044081	6.02848	0.0190164	0.00384581	0.00231805	0.00340857	0.00340857	0.912615	2.55827	1.08278	0.912615
ENSMUSG00000071708	Sms	0.00279306	0.0829649	-0.108007	0.036127	7.23463	0.0150186	0.0010801	0.00379251	0.00230073	0.00379251	0.927869	2.55392	1.08111	0.927869
ENSMUSG00000039463	Slc9a8	0.00278781	0.0829649	-0.168843	0.0564653	5.60975	0.0151569	0.00761478	0.00100666	0.00428833	0.00428833	0.889555	2.55474	1.08111	0.889555
ENSMUSG00000018474	Chd3	0.00279429	0.0829649	0.157414	0.0526556	8.24363	0.056802	0.00072037	0.00963073	0.00216924	0.00963073	1.11529	2.55373	1.08111	1.11529
ENSMUSG00000020159	Gabrp	0.00279753	0.0829649	0.465673	0.155788	3.9866	0.181663	0.0119281	0.0786791	0.0152527	0.0786791	1.38096	2.55322	1.08111	1.38096
ENSMUSG00000030557	Mef2a	0.00282099	0.0832268	0.104864	0.0351115	6.51819	0.01177	0.00113593	0.00346659	0.00278591	0.00346659	1.07539	2.5496	1.07974	1.07539
ENSMUSG00000020387	Jade2	0.00282253	0.0832268	0.215254	0.0720773	4.65002	0.203238	0.0107437	0.00226501	0.00865146	0.00865146	1.16091	2.54936	1.07974	1.16091
ENSMUSG00000000605	Clcn4	0.00281915	0.0832268	0.102849	0.0344346	6.34596	0.0152572	0.0014633	0.00243207	0.00296347	0.00296347	1.07389	2.54988	1.07974	1.07389
ENSMUSG00000030268	Bcat1	0.00282988	0.0832847	-0.114256	0.0382684	6.10845	0.0210023	0.00142527	0.00404209	0.00327862	0.00404209	0.923859	2.54823	1.07943	0.923859
ENSMUSG00000045983	Eif4g1	0.00284816	0.0836587	-0.0763485	0.0255888	7.97483	0.00515319	0.000294653	0.00208815	0.00214989	0.00214989	0.948455	2.54544	1.07749	0.948455
ENSMUSG00000013822	Elof1	0.00285477	0.0836587	-0.107387	0.0360003	6.7476	0.0103321	0.00140019	0.00343828	0.00258219	0.00343828	0.928268	2.54443	1.07749	0.928268
ENSMUSG00000071072	Ptges3	0.00285883	0.0836587	-0.0772896	0.0259142	8.43368	0.00407671	0.000236546	0.00227055	0.00220675	0.00227055	0.947837	2.54381	1.07749	0.947837
ENSMUSG00000002477	Snrpd1	0.00286778	0.083762	-0.0800852	0.0268601	7.33758	0.0109011	0.00043243	0.00176138	0.00226104	0.00226104	0.946002	2.54245	1.07695	0.946002
ENSMUSG00000060477	Irak2	0.00287895	0.0837714	-0.842127	0.282557	2.85219	0.452989	0.0743118	0.223753	0.0418422	0.223753	0.55782	2.54077	1.0769	0.55782
ENSMUSG00000035105	Egln3	0.00287552	0.0837714	0.22036	0.0739279	5.48511	0.0550289	0.00430609	0.0160978	0.00464327	0.0160978	1.16502	2.54128	1.0769	1.16502
ENSMUSG00000020869	Lrrc59	0.0029127	0.0842994	-0.0756587	0.0254161	7.85892	0.00601039	0.000258118	0.00178584	0.00215353	0.00215353	0.948909	2.5357	1.07418	0.948909
ENSMUSG00000022575	Gsdmd	0.00291346	0.0842994	0.676447	0.227245	2.94295	0.339589	0.0797687	0.113022	0.0387638	0.113022	1.5982	2.53559	1.07418	1.5982
ENSMUSG00000024691	Fam111a	0.00290588	0.0842994	-0.0929717	0.0312245	7.08979	0.00596914	0.000881252	0.00275863	0.00236663	0.00275863	0.93759	2.53672	1.07418	0.93759
ENSMUSG00000026021	Sumo1	0.00296246	0.0855569	-0.0797486	0.0268369	7.29729	0.00811197	0.000279103	0.00240971	0.00227584	0.00240971	0.946223	2.52835	1.06775	0.946223
ENSMUSG00000006728	Cdk4	0.00300505	0.0864637	-0.08986	0.0302842	9.1415	0.010072	0.000432743	0.00299123	0.00253858	0.00299123	0.939614	2.52215	1.06317	0.939614
ENSMUSG00000053838	Nudcd3	0.00300278	0.0864637	-0.102959	0.0346963	7.58263	0.00730053	0.000652109	0.00384219	0.00219155	0.00384219	0.931121	2.52248	1.06317	0.931121
ENSMUSG00000035248	Tut7	0.00303527	0.087171	0.102734	0.0346588	7.10121	0.00779483	0.00212364	0.00226169	0.00236097	0.00236097	1.07381	2.5178	1.05963	1.07381
ENSMUSG00000026341	Actr3	0.00307643	0.0880258	-0.0880088	0.0297328	7.08617	0.00643657	0.000838917	0.00246149	0.00236844	0.00246149	0.94082	2.51195	1.05539	0.94082
ENSMUSG00000052566	Hook2	0.00307627	0.0880258	0.12633	0.0426789	5.81572	0.0115903	0.00299662	0.0021261	0.00380361	0.00380361	1.09151	2.51198	1.05539	1.09151
ENSMUSG00000043668	Tox3	0.0030894	0.0882334	0.170115	0.0574966	4.81625	0.0526285	0.00478606	0.00625874	0.00755583	0.00755583	1.12515	2.51013	1.05437	1.12515
ENSMUSG00000021022	Ppp2r3c	0.00310098	0.0884009	-0.119111	0.0402736	6.06023	0.00908018	0.00269933	0.00247073	0.00335601	0.00335601	0.920755	2.5085	1.05354	0.920755
ENSMUSG00000033918	Parl	0.00311534	0.0886465	-0.15491	0.0524033	6.6888	0.0293225	0.00544173	0.00481039	0.00262997	0.00481039	0.898188	2.5065	1.05234	0.898188
ENSMUSG00000030603	Psmc4	0.00313131	0.088774	-0.110768	0.0374906	7.51821	0.0148521	0.0009679	0.00427948	0.00220648	0.00427948	0.926095	2.50427	1.05171	0.926095
ENSMUSG00000066724	Gm10175	0.00312989	0.088774	-0.0895482	0.0303072	7.75481	0.0108766	0.000599603	0.00282957	0.00216297	0.00282957	0.939817	2.50447	1.05171	0.939817
ENSMUSG00000059824	Dbp	0.00313877	0.0888011	0.190209	0.0643944	4.92328	0.0227258	0.00853823	0.00286784	0.00694255	0.00694255	1.14093	2.50324	1.05158	1.14093
ENSMUSG00000033763	Mtss2	0.00314376	0.0888011	0.103616	0.0350846	5.92632	0.0128319	0.00100762	0.00246015	0.00358785	0.00358785	1.07446	2.50255	1.05158	1.07446
ENSMUSG00000039579	Grin3a	0.0031589	0.089066	0.34242	0.116002	4.14277	0.161325	0.019624	0.0306138	0.0132935	0.0306138	1.26788	2.50046	1.05029	1.26788
ENSMUSG00000020664	Dld	0.0031679	0.0891569	-0.0854588	0.0289597	6.88057	0.00457762	0.000644222	0.00112696	0.00248678	0.00248678	0.942485	2.49923	1.04984	0.942485
ENSMUSG00000051790	Nlgn2	0.00322095	0.0904854	0.146194	0.0496275	7.31561	0.0417236	0.00210918	0.00708561	0.00226899	0.00708561	1.10665	2.49202	1.04342	1.10665
ENSMUSG00000008348	Ubc	0.00323111	0.0905933	-0.1839	0.0624481	10.0714	0.0527229	0.00023517	0.014324	0.0035948	0.014324	0.88032	2.49065	1.0429	0.88032
ENSMUSG00000028550	Atg4c	0.00323652	0.0905933	0.14695	0.0499093	5.7012	0.0274379	0.00445516	0.00484435	0.00405759	0.00484435	1.10723	2.48992	1.0429	1.10723
ENSMUSG00000028394	Pole3	0.00324697	0.0907213	-0.0913214	0.0310265	7.29469	0.0103154	0.000987865	0.00260601	0.00227682	0.00260601	0.938663	2.48852	1.04229	0.938663
ENSMUSG00000113836	Gm3325	0.0032613	0.0909572	0.184505	0.0627149	5.52339	0.0227862	0.00667018	0.00801361	0.00452951	0.00801361	1.13643	2.48661	1.04116	1.13643
ENSMUSG00000028398	Dmac1	0.00327361	0.0909723	-0.111569	0.0379384	6.17826	0.00886781	0.00219921	0.00277636	0.00317426	0.00317426	0.925581	2.48497	1.04109	0.925581
ENSMUSG00000045273	Cenph	0.00326964	0.0909723	-0.110713	0.0376423	6.40354	0.0155051	0.00127475	0.00401518	0.00290084	0.00401518	0.92613	2.4855	1.04109	0.92613
ENSMUSG00000027007	Itprid2	0.0032992	0.0915188	0.110673	0.0376644	6.55042	0.0107884	0.00158693	0.0037092	0.00275528	0.0037092	1.07973	2.48159	1.03849	1.07973
ENSMUSG00000078919	Dpm1	0.00333172	0.0922552	-0.274264	0.0934347	5.24782	0.0430239	0.0271365	-0.00180481	0.00545566	0.00545566	0.826872	2.47733	1.03501	0.826872
ENSMUSG00000022178	Ajuba	0.0033588	0.0928387	-0.093234	0.0317897	7.50878	0.00986281	0.000577778	0.00319507	0.00220887	0.00319507	0.937419	2.47382	1.03227	0.937419
ENSMUSG00000078440	Dohh	0.00338011	0.093027	-0.125534	0.0428316	5.64786	0.0229565	0.00266017	0.00408823	0.00418879	0.00418879	0.916665	2.47107	1.03139	0.916665
ENSMUSG00000034285	Nipsnap1	0.00337994	0.093027	-0.118655	0.0404843	5.79339	0.0145186	0.00114595	0.00497289	0.00385044	0.00497289	0.921046	2.47109	1.03139	0.921046
ENSMUSG00000018678	Sp2	0.00338368	0.093027	-0.108552	0.0370415	6.19885	0.00728785	0.00197682	0.00131042	0.00314559	0.00314559	0.927519	2.47061	1.03139	0.927519
ENSMUSG00000023951	Vegfa	0.00340723	0.0933051	0.236289	0.0806891	6.17023	0.0352541	0.00172001	0.0225867	0.00318568	0.0225867	1.17796	2.4676	1.03009	1.17796
ENSMUSG00000073616	Cops9	0.00341795	0.0933051	-0.153594	0.0524675	6.45339	0.0222901	0.00228288	0.00799438	0.00284951	0.00799438	0.899008	2.46623	1.03009	0.899008
ENSMUSG00000069237	Fam8a1	0.00341045	0.0933051	0.10163	0.0347086	6.62632	0.00767409	0.0018126	0.00137179	0.00268491	0.00268491	1.07299	2.46719	1.03009	1.07299
ENSMUSG00000038530	Rgs4	0.00341373	0.0933051	0.196918	0.0672582	5.15363	0.17433	0.00570595	0.0111824	0.00583677	0.0111824	1.14625	2.46677	1.03009	1.14625
ENSMUSG00000051506	Wdfy4	0.00343905	0.0937156	1.29708	0.443372	2.87159	1.04972	0.37141	0.362482	0.0411695	0.362482	2.45731	2.46356	1.02819	2.45731
ENSMUSG00000027349	Fam98b	0.00349038	0.0937489	-0.079889	0.027351	7.53982	0.00598138	0.000591598	0.00100455	0.00220122	0.00220122	0.94613	2.45713	1.02803	0.94613
ENSMUSG00000025140	Pycr1	0.00349363	0.0937489	-0.196979	0.0674447	4.50934	0.0240733	0.00725338	0.00220489	0.00972878	0.00972878	0.872376	2.45672	1.02803	0.872376
ENSMUSG00000021756	Il6st	0.00352815	0.0937489	0.109211	0.0374326	6.80981	0.0124545	0.00229983	0.00293131	0.00253549	0.00293131	1.07864	2.45245	1.02803	1.07864
ENSMUSG00000079225	Gm9531	0.00346269	0.0937489	-0.202505	0.0692713	7.2092	0.028056	0.00418851	0.0137259	0.00231142	0.0137259	0.86904	2.46059	1.02803	0.86904
ENSMUSG00000074656	Eif2s2	0.00353735	0.0937489	-0.08187	0.0280692	8.57883	0.00738032	0.000188984	0.00275244	0.00224921	0.00275244	0.944832	2.45132	1.02803	0.944832
ENSMUSG00000032187	Smarca4	0.00345161	0.0937489	-0.08097	0.0276881	9.40862	0.00454447	0.000105708	0.00164036	0.00275638	0.00275638	0.945422	2.46198	1.02803	0.945422
ENSMUSG00000000346	Dazap2	0.00351193	0.0937489	-0.0973896	0.0333644	6.05153	0.0102056	0.000785615	0.000661233	0.00337027	0.00337027	0.934723	2.45445	1.02803	0.934723
ENSMUSG00000032024	Clmp	0.00351206	0.0937489	0.105943	0.0362949	5.68144	0.0123935	0.000812843	0.00222537	0.00410514	0.00410514	1.0762	2.45444	1.02803	1.0762
ENSMUSG00000018585	Atox1	0.00347936	0.0937489	-0.127071	0.0434896	5.65016	0.0167964	0.00287807	0.00206514	0.00418295	0.00418295	0.915689	2.4585	1.02803	0.915689
ENSMUSG00000021024	Psma6	0.0035341	0.0937489	-0.0871935	0.0298914	7.6028	0.00928384	0.000451315	0.00288441	0.00218736	0.00288441	0.941352	2.45172	1.02803	0.941352
ENSMUSG00000039286	Fndc3b	0.00347391	0.0937489	0.148836	0.05093	6.9253	0.0137721	0.006517	0.00316675	0.00245825	0.00316675	1.10867	2.45918	1.02803	1.10867
ENSMUSG00000001855	Nup214	0.00348268	0.0937489	-0.225154	0.0770662	5.092	0.0336022	0.0108484	0.0113246	0.00610689	0.0113246	0.855503	2.45809	1.02803	0.855503
ENSMUSG00000026709	Dars2	0.00353469	0.0937489	-0.114825	0.0393648	6.76721	0.0157724	0.00267446	0.00311068	0.00256706	0.00311068	0.923494	2.45165	1.02803	0.923494
ENSMUSG00000041773	Enc1	0.00352045	0.0937489	0.153842	0.0527181	7.13427	0.0507786	0.000862738	0.00951292	0.00234506	0.00951292	1.11253	2.4534	1.02803	1.11253
ENSMUSG00000033416	Gucd1	0.00349875	0.0937489	-0.153714	0.0526394	5.31476	0.0117441	0.0051384	0.000884944	0.0052063	0.0052063	0.898933	2.45609	1.02803	0.898933
ENSMUSG00000078521	Aunip	0.00346428	0.0937489	-0.200916	0.0687312	4.84868	0.0342831	0.00902653	0.00860963	0.00736276	0.00860963	0.869998	2.46039	1.02803	0.869998
ENSMUSG00000025283	Sat1	0.00355212	0.093979	0.125224	0.0429525	6.01811	0.0176885	0.00221615	0.00467153	0.00342602	0.00467153	1.09068	2.44951	1.02697	1.09068
ENSMUSG00000036959	Bcorl1	0.00356895	0.0942629	0.175193	0.0601223	6.19251	0.0255248	0.0103405	0.00162998	0.00315432	0.00315432	1.12912	2.44746	1.02566	1.12912
ENSMUSG00000035885	Cox8a	0.00358192	0.094444	-0.0908779	0.0311994	7.44368	0.0156575	0.000560609	0.00307342	0.0022267	0.00307342	0.938951	2.44588	1.02483	0.938951
ENSMUSG00000029910	Mad2l1	0.0035936	0.0945907	-0.0853686	0.0293182	7.5134	0.01162	0.000759306	0.00244971	0.00220769	0.00244971	0.942544	2.44447	1.02415	0.942544
ENSMUSG00000028840	Zfp593	0.00365429	0.0960244	-0.140689	0.048404	5.51916	0.0185151	0.00420516	0.00450523	0.00454186	0.00454186	0.907086	2.4372	1.01762	0.907086
ENSMUSG00000021576	Pdcd6	0.00370083	0.0970825	-0.096425	0.0332203	6.65887	0.00587528	0.00146432	0.000309689	0.00265574	0.00265574	0.935348	2.4317	1.01286	0.935348
ENSMUSG00000071653	1810009A15Rik	0.00370853	0.0971194	-0.126163	0.0434754	6.4457	0.017479	0.00207259	0.00498383	0.00285728	0.00498383	0.916265	2.4308	1.01269	0.916265
ENSMUSG00000042216	Sgsm1	0.00374553	0.0979226	-0.181839	0.0627282	5.3257	0.0313103	0.00952284	-0.000766443	0.00516717	0.00516717	0.881579	2.42649	1.00912	0.881579
ENSMUSG00000045128	Rpl18a	0.00375911	0.0981116	-0.120133	0.0414582	9.32479	0.025774	0.000218717	0.00619807	0.0026817	0.00619807	0.920103	2.42491	1.00828	0.920103
ENSMUSG00000061613	U2af1	0.00380897	0.0982898	-0.0827188	0.0285872	7.6169	0.00578537	0.000866418	0.000189452	0.00218456	0.00218456	0.944276	2.41919	1.00749	0.944276
ENSMUSG00000020777	Acox1	0.00380537	0.0982898	0.107664	0.0372044	6.55424	0.0101844	0.00241587	0.0014107	0.00275169	0.00275169	1.07748	2.4196	1.00749	1.07748
ENSMUSG00000029545	Acads	0.00381047	0.0982898	-0.131565	0.04547	6.1646	0.0329838	0.00215484	0.0055639	0.00319377	0.0055639	0.912841	2.41902	1.00749	0.912841
ENSMUSG00000037287	Tbcel	0.00379922	0.0982898	0.105455	0.0364344	5.97467	0.0054719	0.00145497	0.00126887	0.0035009	0.0035009	1.07583	2.42031	1.00749	1.07583
ENSMUSG00000041390	Mdfic	0.00380322	0.0982898	0.17538	0.0606004	6.2591	0.0356995	0.00298629	0.010724	0.00306654	0.010724	1.12926	2.41985	1.00749	1.12926
ENSMUSG00000026360	Rgs2	0.00379188	0.0982898	0.237119	0.0819072	4.93715	0.0458319	0.00756535	0.0174808	0.00686803	0.0174808	1.17864	2.42115	1.00749	1.17864
ENSMUSG00000024742	Fen1	0.00378164	0.0982898	-0.103214	0.0356423	7.5967	0.0142109	0.000525779	0.00421695	0.00218861	0.00421695	0.930957	2.42232	1.00749	0.930957
ENSMUSG00000058927	Gm10053	0.00382184	0.0984187	-0.111836	0.038664	6.94052	0.0178608	0.00168202	0.00389897	0.00244891	0.00389897	0.92541	2.41773	1.00692	0.92541
ENSMUSG00000022283	Pabpc1	0.00384657	0.0987264	-0.0728547	0.0252051	8.66415	0.0108901	9.18099e-05	0.00121058	0.00227996	0.00227996	0.950755	2.41493	1.00557	0.950755
ENSMUSG00000053835	H2-T24	0.00384062	0.0987264	0.501983	0.173639	2.93921	0.178015	0.0364199	0.0761415	0.0388873	0.0761415	1.41616	2.4156	1.00557	1.41616
ENSMUSG00000015176	Nolc1	0.00388147	0.099457	-0.0873366	0.030245	7.94537	0.00785493	0.000525463	0.00288964	0.00215013	0.00288964	0.941259	2.411	1.00236	0.941259
ENSMUSG00000067274	Rplp0	0.0039113	0.100056	-0.0955493	0.0331167	9.00409	0.013414	0.00018228	0.00391213	0.00244813	0.00391213	0.935916	2.40768	0.999759	0.935916
ENSMUSG00000019817	Plagl1	0.00392607	0.100102	0.15571	0.0539903	6.02097	0.227622	0.00180323	0.00907927	0.0034212	0.00907927	1.11397	2.40604	0.999558	1.11397
ENSMUSG00000025371	Chmp6	0.0039233	0.100102	-0.131129	0.0454635	5.3018	0.00818403	0.00246326	-0.000347541	0.00525328	0.00525328	0.913117	2.40635	0.999558	0.913117
ENSMUSG00000072825	Cep170b	0.00393663	0.100179	0.208742	0.0723995	4.82632	0.0450675	0.0120738	-5.73538e-05	0.00749515	0.00749515	1.15568	2.40488	0.999222	1.15568
ENSMUSG00000061104	Sap18b	0.00394208	0.100179	-0.102766	0.0356485	7.35984	0.0138266	0.000694947	0.00404943	0.00225329	0.00404943	0.931246	2.40427	0.999222	0.931246
ENSMUSG00000034201	Gas2l1	0.00397523	0.100856	0.118185	0.0410347	6.55132	0.00998945	0.00353192	0.000967215	0.00275443	0.00275443	1.08537	2.40064	0.996298	1.08537
ENSMUSG00000048922	Cdca2	0.00401166	0.101447	-0.102458	0.0356097	7.21068	0.00671156	0.00163399	0.00310006	0.00231079	0.00310006	0.931445	2.39668	0.993761	0.931445
ENSMUSG00000005233	Spc25	0.00401026	0.101447	-0.0897404	0.0311885	7.03156	0.00927504	0.00108826	0.00254325	0.00239683	0.00254325	0.939692	2.39683	0.993761	0.939692
ENSMUSG00000055943	Emc7	0.00403454	0.101859	0.107252	0.0372991	6.15597	0.0067186	0.00198756	0.00222465	0.00320633	0.00320633	1.07717	2.39421	0.992001	1.07717
ENSMUSG00000028443	Nudt2	0.00405307	0.102089	-0.161419	0.0561653	5.374	0.0279031	0.00508912	0.00668781	0.00499942	0.00668781	0.894145	2.39222	0.991023	0.894145
ENSMUSG00000031672	Got2	0.00405685	0.102089	-0.0737025	0.0256472	7.67466	0.00687268	0.000281459	0.000843116	0.00217425	0.00217425	0.950196	2.39181	0.991023	0.950196
ENSMUSG00000026971	Itgb6	0.00406472	0.10212	-0.898414	0.312699	2.74638	0.758231	0.319391	-0.00542044	0.0456574	0.0456574	0.536476	2.39097	0.990888	0.536476
ENSMUSG00000003970	Rpl8	0.00408771	0.102199	-0.0895984	0.0312047	9.72246	0.0141009	6.89819e-05	0.00356629	0.00309375	0.00356629	0.939784	2.38852	0.990551	0.939784
ENSMUSG00000048756	Foxo3	0.0040794	0.102199	0.100354	0.0349427	6.10315	0.031382	0.000927589	0.00363078	0.003287	0.00363078	1.07204	2.3894	0.990551	1.07204
ENSMUSG00000003444	Med29	0.00408295	0.102199	-0.117563	0.0409388	5.87521	0.0123384	0.00257261	0.00318726	0.00368441	0.00368441	0.921743	2.38903	0.990551	0.921743
ENSMUSG00000031386	Hcfc1	0.00411557	0.102399	-0.124097	0.0432519	7.59885	0.0101403	0.000372789	0.00661124	0.00218816	0.00661124	0.917578	2.38557	0.989705	0.917578
ENSMUSG00000021694	Ercc8	0.00411059	0.102399	-0.148546	0.0517662	5.98289	0.0189208	0.00651785	0.00207988	0.00348651	0.00348651	0.902159	2.3861	0.989705	0.902159
ENSMUSG00000025630	Hprt	0.00411293	0.102399	-0.131118	0.0456959	6.32594	0.0204946	0.00182992	0.00596571	0.00298623	0.00596571	0.913123	2.38585	0.989705	0.913123
ENSMUSG00000030649	Anapc15	0.00412788	0.10254	-0.156068	0.054413	5.80296	0.0215931	0.00339712	0.00765642	0.00383023	0.00765642	0.897468	2.38427	0.989107	0.897468
ENSMUSG00000026571	Dcaf6	0.00414799	0.102709	0.167173	0.058316	5.74662	0.0194344	0.00874352	0.00304338	0.00395263	0.00395263	1.12286	2.38216	0.988391	1.12286
ENSMUSG00000039231	Suv39h1	0.00414374	0.102709	-0.0787751	0.0274764	7.72557	0.00257167	0.000651816	2.93628e-05	0.00216668	0.00216668	0.946861	2.38261	0.988391	0.946861
ENSMUSG00000015243	Abca1	0.00415743	0.102778	0.232552	0.0811428	5.65018	0.0662191	0.00880841	0.0157724	0.00418291	0.0157724	1.17491	2.38118	0.988099	1.17491
ENSMUSG00000042699	Dhx9	0.00418378	0.1031	-0.0742746	0.0259342	8.78304	0.00396285	0.000180725	0.0011202	0.00233025	0.00233025	0.94982	2.37843	0.986742	0.94982
ENSMUSG00000099032	Tcf24	0.00417988	0.1031	0.769396	0.26862	2.69803	0.519471	0.0934331	0.175951	0.0474846	0.175951	1.70456	2.37884	0.986742	1.70456
ENSMUSG00000019779	Frk	0.00419331	0.10317	0.235633	0.0822958	5.53075	0.0574343	0.00963519	0.0156492	0.00450812	0.0156492	1.17742	2.37744	0.986446	1.17742
ENSMUSG00000019978	Epb41l2	0.00420137	0.103204	0.102021	0.0356387	6.88024	0.0253932	0.000872388	0.00386938	0.002487	0.00386938	1.07328	2.37661	0.986303	1.07328
ENSMUSG00000022330	Osr2	0.00422546	0.103631	0.53632	0.187471	4.89091	0.887793	0.0134028	0.117806	0.00712083	0.117806	1.45027	2.37413	0.98451	1.45027
ENSMUSG00000035247	Hectd1	0.00425702	0.10424	-0.0800074	0.0279897	7.2353	0.0052116	0.000206229	0.00271855	0.00230045	0.00271855	0.946053	2.37089	0.981967	0.946053
ENSMUSG00000032217	Rnf111	0.00427769	0.10458	0.0901833	0.0315666	7.12291	0.00752287	0.00136962	0.00137104	0.00235045	0.00235045	1.06451	2.36879	0.980551	1.06451
ENSMUSG00000057666	Gapdh	0.00428502	0.104581	-0.0945157	0.0330893	9.08499	0.0212611	0.000136182	0.00395146	0.00249971	0.00395146	0.936587	2.36805	0.980549	0.936587
ENSMUSG00000038855	Itpkb	0.00431832	0.104581	0.108426	0.0379921	7.22977	0.042992	0.00065602	0.00473267	0.00230274	0.00473267	1.07805	2.36468	0.980549	1.07805
ENSMUSG00000062981	Mrpl42	0.0043047	0.104581	-0.111156	0.0389347	6.64078	0.0110755	0.00128691	0.00437248	0.0026718	0.00437248	0.925846	2.36606	0.980549	0.925846
ENSMUSG00000030879	Mrpl17	0.00431428	0.104581	-0.159389	0.0558433	6.94477	0.02289	0.0038833	0.00775902	0.00244635	0.00775902	0.895404	2.36509	0.980549	0.895404
ENSMUSG00000057406	Nsd2	0.00429878	0.104581	-0.109243	0.0382591	8.81989	0.011565	0.00311704	0.00216519	0.00234766	0.00234766	0.927074	2.36665	0.980549	0.927074
ENSMUSG00000028412	Slc44a1	0.00431426	0.104581	0.145174	0.0508628	6.30406	0.028427	0.00144638	0.00821185	0.00301175	0.00821185	1.10586	2.36509	0.980549	1.10586
ENSMUSG00000007379	Dennd2c	0.00433373	0.104724	0.290048	0.101672	4.74789	0.0749178	0.00829093	0.0303011	0.00798439	0.0303011	1.22268	2.36314	0.979952	1.22268
ENSMUSG00000030652	Coq7	0.00433782	0.104724	-0.11128	0.0390117	6.49043	0.0224896	0.0020737	0.00360809	0.00281279	0.00360809	0.925766	2.36273	0.979952	0.925766
ENSMUSG00000081557	Gm5697	0.00435071	0.104872	0.763288	0.267675	1.93505	0.269663	0.183193	-0.0709738	0.0843006	0.0843006	1.69735	2.36144	0.979341	1.69735
ENSMUSG00000063576	Klhdc3	0.00437194	0.104893	-0.0943776	0.033115	7.66943	0.0104145	0.00105364	0.00304034	0.0021751	0.00304034	0.936676	2.35933	0.979255	0.936676
ENSMUSG00000032291	Crabp1	0.00436691	0.104893	-0.276471	0.0969951	8.58964	0.925429	0.000324076	0.0347993	0.00225286	0.0347993	0.825608	2.35983	0.979255	0.825608
ENSMUSG00000037419	Endod1	0.00436406	0.104893	0.201006	0.0705143	4.47829	0.0308257	0.00857664	0.00342989	0.00998649	0.00998649	1.1495	2.36011	0.979255	1.1495
ENSMUSG00000041453	Rpl21	0.00440551	0.105209	-0.0742056	0.0260593	8.56112	0.00615026	0.000191043	0.00234422	0.00224337	0.00234422	0.949865	2.356	0.977949	0.949865
ENSMUSG00000062647	Rpl7a	0.00440278	0.105209	-0.0918887	0.032267	9.50202	0.0141707	8.70921e-05	0.0037999	0.0028469	0.0037999	0.938294	2.35627	0.977949	0.938294
ENSMUSG00000022884	Eif4a2	0.00440554	0.105209	0.0900237	0.0316143	7.83312	0.00687365	0.000332718	0.00339861	0.00215532	0.00339861	1.06439	2.356	0.977949	1.06439
ENSMUSG00000037965	Zc3h7a	0.0044487	0.10543	0.135638	0.047685	6.03794	0.023873	0.00409367	0.00439539	0.00339277	0.00439539	1.09858	2.35177	0.977034	1.09858
ENSMUSG00000022516	Nudt16l1	0.0044618	0.10543	-0.0986441	0.0346908	6.60432	0.00772295	0.00178778	0.00100454	0.00270511	0.00270511	0.93391	2.35049	0.977034	0.93391
ENSMUSG00000079055	Slc8a3	0.00446259	0.10543	-0.520642	0.183101	3.11446	0.124795	0.0917369	-0.0431087	0.0334269	0.0334269	0.697062	2.35041	0.977034	0.697062
ENSMUSG00000109511	Nup62	0.00443667	0.10543	-0.0849072	0.029841	7.6327	0.00535186	0.000700743	0.00262373	0.00218156	0.00262373	0.942845	2.35294	0.977034	0.942845
ENSMUSG00000030421	Uri1	0.00443832	0.10543	-0.125223	0.0440118	6.54432	0.0108704	0.00211904	0.00511257	0.00276103	0.00511257	0.916863	2.35278	0.977034	0.916863
ENSMUSG00000014294	Ndufa2	0.00442177	0.10543	-0.12146	0.0426716	6.5432	0.0195502	0.00160938	0.00518851	0.00276209	0.00518851	0.919257	2.3544	0.977034	0.919257
ENSMUSG00000026240	Cops7b	0.00444974	0.10543	-0.0890429	0.0313048	6.88203	0.00487294	0.0011728	0.000259469	0.00248582	0.00248582	0.940146	2.35167	0.977034	0.940146
ENSMUSG00000062006	Rpl34	0.00447402	0.105479	-0.128198	0.0450981	8.04783	0.0229957	0.000478701	0.0071143	0.00215129	0.0071143	0.914974	2.3493	0.976832	0.914974
ENSMUSG00000046572	Zfp518b	0.00447832	0.105479	-0.112884	0.039715	7.52528	0.00788775	0.00368379	-0.000371336	0.00220473	0.00220473	0.924738	2.34889	0.976832	0.924738
ENSMUSG00000027326	Knl1	0.00449205	0.105642	-0.107392	0.0377958	7.19076	0.0117461	0.00163453	0.00369863	0.0023194	0.00369863	0.928265	2.34756	0.976164	0.928265
ENSMUSG00000028932	Psmc2	0.00449951	0.105656	-0.0858415	0.030217	8.28988	0.00780046	0.000390681	0.0030181	0.00217652	0.0030181	0.942235	2.34683	0.976104	0.942235
ENSMUSG00000034957	Cebpa	0.00451929	0.10596	0.304989	0.107412	4.17723	0.0733797	0.0154972	0.0275753	0.0129031	0.0275753	1.23541	2.34493	0.974859	1.23541
ENSMUSG00000050107	Haspin	0.00459596	0.107548	-0.12691	0.0447801	6.02975	0.0115369	0.00260097	0.00488533	0.00340644	0.00488533	0.915791	2.33762	0.968399	0.915791
ENSMUSG00000061666	Gdpd1	0.00460094	0.107548	0.116891	0.04125	5.88521	0.00942259	0.00268741	0.00179094	0.0036651	0.0036651	1.0844	2.33715	0.968399	1.0844
ENSMUSG00000009927	Rps25	0.00462436	0.107932	-0.0771163	0.0272294	9.18964	0.0125426	0.000194437	0.0020112	0.0025736	0.0025736	0.947951	2.33495	0.96685	0.947951
ENSMUSG00000029208	Guf1	0.00464233	0.108188	0.0903256	0.0319075	6.67562	0.00891871	0.000926096	0.00287477	0.0026412	0.00287477	1.06461	2.33326	0.965821	1.06461
ENSMUSG00000026238	Ptma	0.00471414	0.109531	-0.0880386	0.0311537	10.0772	0.00657241	1.89053e-05	0.00147066	0.00360449	0.00360449	0.940801	2.3266	0.960462	0.940801
ENSMUSG00000021037	Ahsa1	0.00470917	0.109531	-0.0742167	0.0262595	7.88989	0.00604417	0.000422509	0.00196537	0.00215185	0.00215185	0.949858	2.32706	0.960462	0.949858
ENSMUSG00000031644	Nek1	0.00472482	0.109615	0.101129	0.0357952	6.43213	0.00830282	0.0019124	0.000239783	0.00287111	0.00287111	1.07261	2.32561	0.960132	1.07261
ENSMUSG00000022814	Umps	0.00474672	0.109957	-0.0955029	0.0338215	7.58552	0.00812069	0.000478826	0.0037917	0.00219094	0.0037917	0.935946	2.32361	0.958776	0.935946
ENSMUSG00000054717	Hmgb2	0.0047546	0.109975	-0.124004	0.0439231	7.51501	0.0225177	0.000937493	0.006265	0.00220729	0.006265	0.917637	2.32289	0.958706	0.917637
ENSMUSG00000053907	Mat2a	0.00478032	0.11024	-0.0855972	0.0303377	6.90385	0.0176677	0.000372132	0.00306394	0.00247172	0.00306394	0.942394	2.32054	0.957662	0.942394
ENSMUSG00000013465	Nelfb	0.00477942	0.11024	-0.121879	0.043196	5.88451	0.0102563	0.00329954	0.00183782	0.00366645	0.00366645	0.91899	2.32062	0.957662	0.91899
ENSMUSG00000031885	Cbfb	0.00479029	0.110305	0.0725959	0.0257358	8.30438	0.00841847	0.000293667	0.000508684	0.00217905	0.00217905	1.05161	2.31964	0.957404	1.05161
ENSMUSG00000113251	Gm18363	0.00484327	0.111359	-0.508095	0.18035	3.13356	0.169494	0.0453711	0.0760594	0.0328721	0.0760594	0.70315	2.31486	0.953274	0.70315
ENSMUSG00000017861	Mybl2	0.00486066	0.111593	-0.126385	0.0448789	5.47096	0.0188389	0.00283294	0.00204447	0.00468644	0.00468644	0.916124	2.31331	0.952364	0.916124
ENSMUSG00000060377	Rpl36a-ps1	0.00488119	0.111898	1.30059	0.46206	1.76049	1.10869	0.442926	0.354139	0.0951493	0.354139	2.4633	2.31147	0.951177	2.4633
ENSMUSG00000038644	Pold1	0.00490063	0.112177	-0.0965279	0.0343089	6.73747	0.00648393	0.00180434	0.00167034	0.00259017	0.00259017	0.935281	2.30975	0.950096	0.935281
ENSMUSG00000022193	Psmb5	0.00495096	0.112828	-0.0840125	0.0298955	6.92801	0.0181802	0.00088006	0.00230257	0.00245657	0.00245657	0.94343	2.30531	0.947584	0.94343
ENSMUSG00000045665	Mfsd5	0.00494709	0.112828	-0.111937	0.0398286	6.3075	0.00816696	0.00205696	0.00386529	0.00300769	0.00386529	0.925345	2.30565	0.947584	0.925345
ENSMUSG00000055839	Elob	0.0049392	0.112828	-0.103715	0.0368966	7.33352	0.0102181	0.000711946	0.00437046	0.00226249	0.00437046	0.930633	2.30634	0.947584	0.930633
ENSMUSG00000049916	2610318N02Rik	0.00495867	0.112837	-0.150313	0.0534979	6.42816	0.0348343	0.00161486	0.00907003	0.00287519	0.00907003	0.901055	2.30463	0.947548	0.901055
ENSMUSG00000069303	Hist1h2br	0.00496692	0.112859	1.68242	0.598902	1.97098	1.4863	1.25689	-0.361412	0.0821916	0.0821916	3.20966	2.30391	0.947465	3.20966
ENSMUSG00000058135	Gstm1	0.00502939	0.113279	0.158726	0.056584	4.8717	0.0101693	0.00472365	-0.00221015	0.00722957	0.00722957	1.1163	2.29848	0.945852	1.1163
ENSMUSG00000019923	Zwint	0.0050039	0.113279	-0.0739537	0.0263482	7.51715	0.0094733	0.000385035	0.00155192	0.00220675	0.00220675	0.950031	2.30069	0.945852	0.950031
ENSMUSG00000020647	Ncoa1	0.00502204	0.113279	0.210873	0.0751611	5.27844	0.051696	0.00781902	0.0132713	0.00533948	0.0132713	1.15739	2.29912	0.945852	1.15739
ENSMUSG00000030120	Mlf2	0.00501508	0.113279	-0.0737172	0.0262707	7.41747	0.00318664	0.000341986	0.000886994	0.00223457	0.00223457	0.950187	2.29972	0.945852	0.950187
ENSMUSG00000035683	Melk	0.00501433	0.113279	-0.108185	0.0385533	5.40574	0.0138343	0.000655506	0.00120011	0.00489356	0.00489356	0.927755	2.29979	0.945852	0.927755
ENSMUSG00000027750	Postn	0.00502767	0.113279	0.467718	0.166729	6.39842	0.766821	0.00493927	0.0988422	0.00290626	0.0988422	1.38292	2.29863	0.945852	1.38292
ENSMUSG00000039046	Usp6nl	0.00504001	0.113353	0.106539	0.0379891	6.6434	0.0193648	0.00263703	0.00275082	0.00266945	0.00275082	1.07664	2.29757	0.945568	1.07664
ENSMUSG00000022422	Dscc1	0.00517863	0.116301	-0.148958	0.053281	5.72482	0.0239205	0.00377381	0.00682461	0.00400225	0.00682461	0.901902	2.28578	0.934417	0.901902
ENSMUSG00000021840	Mapk1ip1l	0.00520225	0.116662	-0.0713595	0.0255381	8.43848	0.00397964	0.000226896	0.0016344	0.00220796	0.00220796	0.951741	2.28381	0.933072	0.951741
ENSMUSG00000022843	Clcn2	0.00521343	0.116743	0.118683	0.0424849	6.57021	0.0137214	0.00400181	-0.000298589	0.00273672	0.00273672	1.08574	2.28288	0.932769	1.08574
ENSMUSG00000047003	Zfp41	0.00522406	0.116758	-0.0819717	0.0293502	7.01659	0.00428993	0.000811055	0.00144005	0.00240497	0.00240497	0.944766	2.28199	0.932712	0.944766
ENSMUSG00000041734	Kirrel	0.00522923	0.116758	0.0715372	0.0256171	8.21328	0.0205021	0.000284845	0.0010041	0.00216509	0.00216509	1.05084	2.28156	0.932712	1.05084
ENSMUSG00000020897	Aurkb	0.00530393	0.118205	-0.0932848	0.0334597	6.50837	0.00696352	0.00138431	0.000144066	0.00279536	0.00279536	0.937386	2.2754	0.927366	0.937386
ENSMUSG00000003528	Slc25a1	0.00531634	0.118205	-0.123645	0.0443616	5.61485	0.00865596	0.00307229	0.00297299	0.00427473	0.00427473	0.917866	2.27439	0.927366	0.917866
ENSMUSG00000020894	Vamp2	0.00531695	0.118205	0.154465	0.0554199	5.95275	0.024101	0.0019356	0.00953082	0.00353983	0.00953082	1.11301	2.27434	0.927366	1.11301
ENSMUSG00000024143	Rhoq	0.00534566	0.118502	0.111676	0.0400929	5.3071	0.00875133	0.000767105	0.0027889	0.005234	0.005234	1.08048	2.272	0.926275	1.08048
ENSMUSG00000054428	Atpif1	0.00534475	0.118502	-0.117439	0.042161	7.39589	0.0107541	0.00067137	0.00596481	0.00224135	0.00596481	0.921823	2.27207	0.926275	0.921823
ENSMUSG00000015143	Actn1	0.00537861	0.119061	-0.085217	0.0306157	7.08401	0.0186731	0.00112981	0.00160275	0.00236952	0.00236952	0.942643	2.26933	0.924229	0.942643
ENSMUSG00000005354	Txn2	0.00541286	0.119477	-0.0997926	0.0358788	6.40159	0.0107423	0.000924507	0.00388137	0.0029029	0.00388137	0.933167	2.26657	0.922715	0.933167
ENSMUSG00000041491	Cep78	0.00540812	0.119477	-0.0869974	0.0312753	6.84105	0.00653446	0.00113832	0.00134859	0.00251342	0.00251342	0.94148	2.26695	0.922715	0.94148
ENSMUSG00000074994	Qser1	0.00544858	0.120094	-0.0794443	0.0285849	7.99801	0.00491361	0.000392689	0.0026578	0.00215002	0.0026578	0.946422	2.26372	0.920478	0.946422
ENSMUSG00000022505	Emp2	0.00550757	0.120942	0.265984	0.0958243	4.80255	0.0795932	0.0106543	0.0236263	0.00763936	0.0236263	1.20246	2.25904	0.917421	1.20246
ENSMUSG00000031595	Pdgfrl	0.00551055	0.120942	0.270143	0.0973288	4.64828	0.129737	0.0124196	0.0229459	0.00866393	0.0229459	1.20593	2.25881	0.917421	1.20593
ENSMUSG00000004642	Slbp	0.00550489	0.120942	-0.0731065	0.0263361	7.44506	0.00286884	0.000363114	0.000326068	0.0022263	0.0022263	0.950589	2.25925	0.917421	0.950589
ENSMUSG00000050700	Emilin3	0.00552738	0.120968	0.272971	0.0983829	5.28583	0.2276	0.00543271	0.0307029	0.00531198	0.0307029	1.20829	2.25748	0.917329	1.20829
ENSMUSG00000028702	Rad54l	0.00552253	0.120968	-0.0837828	0.0301935	6.79448	0.0118238	0.000750354	0.00265313	0.00254665	0.00265313	0.94358	2.25786	0.917329	0.94358
ENSMUSG00000026511	Srp9	0.00554063	0.121087	-0.0825546	0.0297623	7.06394	0.0101676	0.000927219	0.0016187	0.00237975	0.00237975	0.944384	2.25644	0.916904	0.944384
ENSMUSG00000071497	Nutf2-ps1	0.00555219	0.121168	-0.0859486	0.0309935	7.6178	0.00831839	0.00140184	0.000761621	0.00218439	0.00218439	0.942165	2.25554	0.916613	0.942165
ENSMUSG00000025858	Get4	0.00561654	0.121826	-0.0911524	0.0329145	6.64331	0.0107035	0.00137504	0.00253595	0.00266953	0.00266953	0.938773	2.25053	0.91426	0.938773
ENSMUSG00000050148	Ubqln2	0.00563901	0.121826	-0.0706851	0.0255359	8.16145	0.00294267	0.00027527	0.00161749	0.00215918	0.00215918	0.952186	2.2488	0.91426	0.952186
ENSMUSG00000035268	Pkig	0.00559189	0.121826	-0.109621	0.039563	5.83001	0.0112178	0.00206929	0.00375161	0.00377424	0.00377424	0.926831	2.25244	0.91426	0.926831
ENSMUSG00000029287	Tgfbr3	0.00563914	0.121826	0.182251	0.0658407	4.91762	0.0570834	0.00366405	0.0125199	0.00697331	0.0125199	1.13465	2.24879	0.91426	1.13465
ENSMUSG00000028629	Exo5	0.00561282	0.121826	-0.154018	0.0556106	6.04842	0.0192808	0.00391851	0.00762698	0.00337539	0.00762698	0.898744	2.25082	0.91426	0.898744
ENSMUSG00000031754	Nudt21	0.00564542	0.121826	-0.0960322	0.0346975	6.59878	0.00860974	0.0017844	0.00168205	0.00271023	0.00271023	0.935603	2.2483	0.91426	0.935603
ENSMUSG00000031843	Mphosph6	0.0056329	0.121826	-0.106109	0.0383284	6.15159	0.00862856	0.00227176	0.00101363	0.00321276	0.00321276	0.92909	2.24927	0.91426	0.92909
ENSMUSG00000011831	Evi5	0.00560523	0.121826	0.0992659	0.0358358	5.9683	0.00651221	0.00128223	0.001383	0.00351212	0.00351212	1.07123	2.25141	0.91426	1.07123
ENSMUSG00000002661	Alkbh7	0.00566326	0.122041	-0.165896	0.0599622	4.91805	0.0238445	0.00645212	0.00288571	0.00697097	0.00697097	0.891375	2.24693	0.913496	0.891375
ENSMUSG00000043991	Pura	0.00571161	0.122506	0.121062	0.0438013	6.06606	0.0101357	0.00229479	0.0048678	0.00334651	0.0048678	1.08754	2.24324	0.911842	1.08754
ENSMUSG00000047037	Nipa1	0.00570125	0.122506	0.143097	0.0517628	5.27331	0.0155795	0.00464434	0.0035737	0.00535869	0.00535869	1.10427	2.24403	0.911842	1.10427
ENSMUSG00000067825	Pex26	0.00571659	0.122506	0.118599	0.0429147	5.81143	0.00885025	0.00306304	0.00135317	0.00381252	0.00381252	1.08568	2.24286	0.911842	1.08568
ENSMUSG00000042851	Zc3h6	0.00571377	0.122506	0.304762	0.11027	4.71087	0.0616247	0.0178558	0.02754	0.00822913	0.02754	1.23521	2.24308	0.911842	1.23521
ENSMUSG00000054939	Zfp174	0.00576659	0.123236	0.202154	0.0732239	4.54445	0.041078	0.010571	0.00798667	0.00944621	0.00944621	1.15041	2.23908	0.909262	1.15041
ENSMUSG00000020457	Drg1	0.00576111	0.123236	-0.100359	0.0363479	6.01425	0.00578506	0.0014998	2.4094e-05	0.00343256	0.00343256	0.932801	2.23949	0.909262	0.932801
ENSMUSG00000031563	Wwc2	0.00581851	0.124174	0.0754895	0.0273727	7.3007	0.00935662	0.000522713	0.00203531	0.00227455	0.00227455	1.05372	2.23519	0.90597	1.05372
ENSMUSG00000025402	Nab2	0.00582681	0.124179	0.130846	0.0474533	6.42231	0.0117467	0.00130064	0.00710616	0.00288124	0.00710616	1.09494	2.23457	0.90595	1.09494
ENSMUSG00000042772	Smg7	0.00587155	0.124961	0.0890198	0.0323136	7.30806	0.00507714	0.00162645	0.00141116	0.00227179	0.00227179	1.06365	2.23125	0.903227	1.06365
ENSMUSG00000032436	Cmtm7	0.00588438	0.125061	-0.150724	0.054726	5.39699	0.015375	0.00378719	0.00739389	0.0049224	0.00739389	0.900798	2.2303	0.902877	0.900798
ENSMUSG00000036932	Aifm1	0.00590831	0.12525	-0.0944041	0.0342935	7.23017	0.00685337	0.00142708	0.00296349	0.00230258	0.00296349	0.936659	2.22854	0.902221	0.936659
ENSMUSG00000048351	Coa7	0.00590949	0.12525	-0.240129	0.0872322	4.89184	0.0341711	0.021293	-0.0132318	0.00711563	0.00711563	0.846669	2.22845	0.902221	0.846669
ENSMUSG00000031388	Naa10	0.00594197	0.125615	-0.0883439	0.0321138	6.78295	0.012391	0.00129497	0.00235802	0.00255519	0.00255519	0.940602	2.22607	0.900957	0.940602
ENSMUSG00000042590	Ipo11	0.00594297	0.125615	-0.0832355	0.0302574	6.88703	0.0151116	0.000935351	0.00216544	0.00248256	0.00248256	0.943938	2.226	0.900957	0.943938
ENSMUSG00000018765	Fxr2	0.00595277	0.125651	0.105072	0.0382029	5.99977	0.0103209	0.00199136	0.00194472	0.00345729	0.00345729	1.07555	2.22528	0.900835	1.07555
ENSMUSG00000034675	Dbn1	0.00596901	0.125822	-0.069522	0.0252855	7.57029	0.00608713	0.000192699	0.000780292	0.00219423	0.00219423	0.952954	2.2241	0.900245	0.952954
ENSMUSG00000022180	Slc7a8	0.00601162	0.126547	0.359985	0.131039	3.24472	0.0844897	0.0343084	0.0121235	0.0297979	0.0297979	1.28341	2.22101	0.897748	1.28341
ENSMUSG00000057036	Gm7536	0.00603768	0.126852	-0.0834725	0.0304009	8.65085	0.0117841	0.000240268	0.00321012	0.00227488	0.00321012	0.943783	2.21913	0.896702	0.943783
ENSMUSG00000035172	Plekhh3	0.00604253	0.126852	0.293824	0.107022	4.52994	0.106192	0.012786	0.0299743	0.00956181	0.0299743	1.22589	2.21878	0.896702	1.22589
ENSMUSG00000052504	Epha3	0.00606069	0.127061	0.191511	0.0697806	6.39909	0.148709	0.00102876	0.0171501	0.00290555	0.0171501	1.14196	2.21748	0.895989	1.14196
ENSMUSG00000022200	Golph3	0.00610467	0.127809	0.0776214	0.0283072	7.4516	0.00490592	0.000664498	0.00232702	0.0022244	0.00232702	1.05528	2.21434	0.893437	1.05528
ENSMUSG00000068015	Lrch1	0.00615487	0.128125	0.137103	0.0500482	5.17373	0.0110062	0.00359904	0.00429726	0.00575228	0.00575228	1.09969	2.21078	0.892368	1.09969
ENSMUSG00000028961	Pgd	0.00614564	0.128125	-0.0812098	0.0296396	6.63725	0.00595712	0.00060478	0.00198731	0.00267497	0.00267497	0.945265	2.21143	0.892368	0.945265
ENSMUSG00000101452	Gm28530	0.00616669	0.128125	0.631097	0.23043	2.30643	0.211497	0.133845	-0.0148806	0.0643868	0.0643868	1.54874	2.20995	0.892368	1.54874
ENSMUSG00000039137	Whrn	0.00616286	0.128125	0.154618	0.0564509	5.96679	0.0299887	0.00838222	-0.00342421	0.0035148	0.0035148	1.11313	2.21022	0.892368	1.11313
ENSMUSG00000067121	Gm7027	0.0061451	0.128125	0.257564	0.0940038	4.06801	0.043078	0.0187987	0.00898558	0.0141917	0.0141917	1.19546	2.21147	0.892368	1.19546
ENSMUSG00000031490	Eif4ebp1	0.00616948	0.128125	-0.151394	0.0552808	6.12678	0.0398191	0.00476156	0.0066474	0.00325009	0.0066474	0.90038	2.20975	0.892368	0.90038
ENSMUSG00000020485	Supt4a	0.00621301	0.12876	-0.0921865	0.0336899	6.84041	0.0130906	0.00118609	0.00305129	0.00251387	0.00305129	0.9381	2.2067	0.890218	0.9381
ENSMUSG00000006057	Atp5g1	0.00621676	0.12876	-0.11713	0.0428088	8.73543	0.0167955	0.0011194	0.00572227	0.00230905	0.00572227	0.92202	2.20644	0.890218	0.92202
ENSMUSG00000014959	Gorasp2	0.00624949	0.12892	-0.0849025	0.0310498	7.42015	0.00703967	0.00130933	0.00228995	0.00223375	0.00228995	0.942848	2.20416	0.889681	0.942848
ENSMUSG00000029246	Ppat	0.00624396	0.12892	-0.0871133	0.0318549	7.35839	0.0117452	0.00113201	0.00265634	0.00225378	0.00265634	0.941405	2.20454	0.889681	0.941405
ENSMUSG00000012483	Rpa3	0.00624181	0.12892	-0.0996501	0.0364378	6.3322	0.011912	0.00179669	0.0031601	0.00297906	0.0031601	0.933259	2.20469	0.889681	0.933259
ENSMUSG00000015749	Anp32e	0.0062588	0.12894	-0.0747299	0.0273345	7.89877	0.00715191	0.000637985	0.00163425	0.00215146	0.00215146	0.94952	2.20351	0.889614	0.94952
ENSMUSG00000028367	Txn1	0.00628859	0.129106	-0.121021	0.0442921	8.05359	0.018603	0.000379432	0.00694459	0.00215152	0.00694459	0.919537	2.20145	0.889053	0.919537
ENSMUSG00000035112	Wnk4	0.00629195	0.129106	0.51375	0.188038	4.83051	0.201584	0.0549561	0.0770478	0.00747012	0.0770478	1.42776	2.20121	0.889053	1.42776
ENSMUSG00000029771	Irf5	0.00629004	0.129106	0.892827	0.326772	2.3204	0.525627	0.271481	0.127164	0.0637156	0.127164	1.85681	2.20135	0.889053	1.85681
ENSMUSG00000000399	Ndufa9	0.00631901	0.129489	-0.08481	0.0310574	7.11471	0.0109157	0.000887562	0.00271346	0.00235439	0.00271346	0.942909	2.19935	0.887766	0.942909
ENSMUSG00000029777	Gars	0.00638652	0.130257	-0.0852911	0.0312737	6.82704	0.0126727	0.000350157	0.0033012	0.0025232	0.0033012	0.942594	2.19474	0.885198	0.942594
ENSMUSG00000040452	Cdh12	0.00636707	0.130257	0.531002	0.194631	2.95603	0.482365	0.084771	0.0566518	0.0383345	0.0566518	1.44493	2.19606	0.885198	1.44493
ENSMUSG00000094825	Gm3194	0.00638994	0.130257	-0.137071	0.0502632	5.94077	0.019485	0.00586703	0.00356482	0.00356144	0.00356482	0.909363	2.1945	0.885198	0.909363
ENSMUSG00000063235	Ptpmt1	0.0063902	0.130257	-0.15433	0.0565921	5.04347	0.0223552	0.00562457	0.00456748	0.00633206	0.00633206	0.89855	2.19449	0.885198	0.89855
ENSMUSG00000056076	Eif3b	0.00642548	0.130804	-0.0729036	0.0267513	6.84317	0.00938644	0.000159721	0.00226609	0.00251196	0.00251196	0.950723	2.19209	0.883379	0.950723
ENSMUSG00000004945	Tmem242	0.00643572	0.13084	-0.0956068	0.0350887	6.80961	0.0099586	0.000907286	0.00368927	0.00253563	0.00368927	0.935879	2.1914	0.88326	0.935879
ENSMUSG00000053310	Nrgn	0.00646073	0.131176	0.390746	0.143476	3.00674	0.113134	0.0401476	0.0294782	0.036704	0.036704	1.31107	2.18972	0.882146	1.31107
ENSMUSG00000029470	P2rx4	0.00653468	0.132306	-0.783112	0.287944	2.95494	0.420766	0.0921237	0.217413	0.0383702	0.217413	0.581112	2.18478	0.87842	0.581112
ENSMUSG00000004667	Polr2e	0.00653514	0.132306	-0.0893335	0.0328474	7.4092	0.0139572	0.000688374	0.00333972	0.00223714	0.00333972	0.939957	2.18475	0.87842	0.939957
ENSMUSG00000035242	Oaz1	0.00655922	0.132306	-0.108715	0.0399918	8.25709	0.0192533	0.000980725	0.00499016	0.00217123	0.00499016	0.927414	2.18315	0.87842	0.927414
ENSMUSG00000039159	Ube2h	0.00655798	0.132306	0.151814	0.055845	5.7204	0.0157627	0.000827126	0.0108159	0.00401248	0.0108159	1.11097	2.18323	0.87842	1.11097
ENSMUSG00000097530	Kansl2-ps	0.00654844	0.132306	1.4547	0.535018	2.09841	1.40004	0.573136	0.495509	0.075035	0.495509	2.741	2.18386	0.87842	2.741
ENSMUSG00000051695	Pcbp1	0.00658717	0.132664	-0.0715112	0.0263197	8.92997	0.00439027	0.000128353	0.00245782	0.00240493	0.00245782	0.951641	2.1813	0.877246	0.951641
ENSMUSG00000027082	Tfpi	0.00659414	0.132664	0.159552	0.0587305	5.60741	0.0335006	0.00858269	-0.000827918	0.00429459	0.00429459	1.11694	2.18084	0.877246	1.11694
ENSMUSG00000095742	CAAA01147332.1	0.00675411	0.133674	-0.227278	0.0839058	4.21817	0.0511152	0.0138256	0.00198946	0.0124577	0.0124577	0.854245	2.17043	0.873953	0.854245
ENSMUSG00000042750	Bex2	0.00669563	0.133674	-0.0779915	0.028762	7.18376	0.00544356	0.000765934	0.00187558	0.00232248	0.00232248	0.947376	2.17421	0.873953	0.947376
ENSMUSG00000038521	C1s1	0.00675292	0.133674	0.662141	0.244442	1.83419	0.377548	0.0854115	0.137662	0.0904454	0.137662	1.58243	2.17051	0.873953	1.58243
ENSMUSG00000023988	Bysl	0.00668623	0.133674	-0.106289	0.039191	6.88478	0.00889758	0.00105067	0.00468349	0.00248403	0.00468349	0.928974	2.17482	0.873953	0.928974
ENSMUSG00000024537	Psmg2	0.00665869	0.133674	-0.100251	0.0369462	6.24742	0.00817491	0.00201473	0.00168357	0.00308134	0.00308134	0.93287	2.17661	0.873953	0.93287
ENSMUSG00000017692	Rhbdl3	0.00671385	0.133674	0.422752	0.155956	2.34044	0.523604	0.0280416	0.00787822	0.0627617	0.0627617	1.34048	2.17303	0.873953	1.34048
ENSMUSG00000029797	Sspo	0.00670446	0.133674	0.806651	0.297528	4.22668	0.467585	0.205354	0.125131	0.0123675	0.125131	1.74915	2.17364	0.873953	1.74915
ENSMUSG00000067924	Rtl8b	0.00674909	0.133674	-0.121913	0.0450032	6.31953	0.0101671	0.0032777	0.00428338	0.00299363	0.00428338	0.918968	2.17075	0.873953	0.918968
ENSMUSG00000006315	Tmem147	0.00675681	0.133674	-0.11578	0.0427453	5.97452	0.00943024	0.00230897	0.00451241	0.00350117	0.00451241	0.922883	2.17026	0.873953	0.922883
ENSMUSG00000046794	Ppp1r3b	0.00673129	0.133674	0.215141	0.0793921	5.74702	0.279345	0.00390795	0.0196237	0.00395173	0.0196237	1.16082	2.1719	0.873953	1.16082
ENSMUSG00000094090	Gm8494	0.00667992	0.133674	0.276026	0.101765	3.95372	0.0360202	0.0229556	-0.00236408	0.0157069	0.0157069	1.21085	2.17523	0.873953	1.21085
ENSMUSG00000028464	Tpm2	0.00672437	0.133674	-0.263473	0.0972156	6.1222	0.0455959	0.00383419	0.0314491	0.00325713	0.0314491	0.83308	2.17235	0.873953	0.83308
ENSMUSG00000032902	Slc16a1	0.00669444	0.133674	-0.0771752	0.0284603	7.28006	0.0145778	0.000741503	0.00139703	0.00228246	0.00228246	0.947912	2.17429	0.873953	0.947912
ENSMUSG00000038496	Slc19a3	0.00678404	0.133699	0.780624	0.288344	1.67069	0.408873	0.209264	0.057504	0.101134	0.101134	1.71787	2.16851	0.873871	1.71787
ENSMUSG00000032470	Mras	0.00677552	0.133699	0.187607	0.0692869	4.69241	0.0384055	0.00956791	0.00723385	0.00835462	0.00835462	1.13887	2.16906	0.873871	1.13887
ENSMUSG00000034330	Plcg2	0.00676731	0.133699	-0.251402	0.0928341	4.57544	0.143403	0.0101299	0.0220445	0.00920447	0.0220445	0.840079	2.16958	0.873871	0.840079
ENSMUSG00000046032	Snx12	0.00680441	0.133701	-0.100987	0.0373159	6.28539	0.00961613	0.00216446	0.000286023	0.00303411	0.00303411	0.932395	2.16721	0.873866	0.932395
ENSMUSG00000042489	Clspn	0.00680006	0.133701	-0.135883	0.0502064	5.77063	0.0211822	0.0038495	0.00556104	0.00389946	0.00556104	0.910113	2.16749	0.873866	0.910113
ENSMUSG00000074884	Serf2	0.00681008	0.133701	-0.105852	0.0391177	8.57139	0.0123504	0.000912528	0.0048002	0.00224673	0.0048002	0.929256	2.16685	0.873866	0.929256
ENSMUSG00000021178	Psmc1	0.00684074	0.134132	-0.084535	0.0312572	6.98021	0.00754019	0.00122206	0.00205829	0.00242544	0.00242544	0.943088	2.1649	0.872466	0.943088
ENSMUSG00000058163	Gm5431	0.00685969	0.134333	-0.597618	0.221047	2.27734	0.231441	0.116615	0.0487987	0.0658023	0.0658023	0.660844	2.1637	0.871816	0.660844
ENSMUSG00000053477	Tcf4	0.00687985	0.134558	0.0761353	0.0281711	6.96116	0.00972317	0.000526251	0.00218711	0.00243656	0.00243656	1.05419	2.16242	0.871091	1.05419
ENSMUSG00000017188	Coa3	0.00691066	0.13483	-0.130066	0.0481527	5.8439	0.014371	0.00336546	0.00529095	0.00374616	0.00529095	0.91379	2.16048	0.870213	0.91379
ENSMUSG00000020621	Rdh14	0.00691123	0.13483	0.154539	0.0572135	5.38027	0.0306223	0.00438882	0.0078318	0.00497822	0.0078318	1.11307	2.16044	0.870213	1.11307
ENSMUSG00000004187	Kifc2	0.00700175	0.135143	0.282233	0.104656	4.57611	0.091733	0.0207256	0.0201654	0.00919933	0.0201654	1.21608	2.15479	0.869207	1.21608
ENSMUSG00000032383	Ppib	0.00693807	0.135143	-0.0735653	0.0272484	8.88283	0.00563795	0.000392489	0.0023634	0.00237942	0.00237942	0.950287	2.15876	0.869207	0.950287
ENSMUSG00000049191	Rtl5	0.00698265	0.135143	0.250712	0.0929367	6.30271	0.0908698	0.0211022	0.0111434	0.00301335	0.0111434	1.18979	2.15598	0.869207	1.18979
ENSMUSG00000030720	Cln3	0.00694679	0.135143	0.230286	0.0853107	4.73799	0.0373097	0.0130164	0.0141545	0.00804894	0.0141545	1.17307	2.15822	0.869207	1.17307
ENSMUSG00000029304	Spp1	0.00700598	0.135143	0.61466	0.227942	2.7824	0.250569	0.0925852	0.10139	0.0443305	0.10139	1.5312	2.15453	0.869207	1.5312
ENSMUSG00000058833	Rex1bd	0.00698218	0.135143	-0.104389	0.0386957	6.27725	0.0103714	0.00194299	0.00364713	0.00304403	0.00364713	0.930199	2.15601	0.869207	0.930199
ENSMUSG00000005958	Ephb3	0.00699741	0.135143	0.0791554	0.0293498	7.32671	0.00612768	0.000696374	0.00251956	0.00226494	0.00251956	1.0564	2.15506	0.869207	1.0564
ENSMUSG00000042380	Smim12	0.0069756	0.135143	-0.147047	0.0545022	5.5998	0.017553	0.00419056	0.00689929	0.00431506	0.00689929	0.903097	2.15642	0.869207	0.903097
ENSMUSG00000006931	P3h4	0.006997	0.135143	0.133147	0.0493688	5.67302	0.0460422	0.00497342	0.000642202	0.00412577	0.00412577	1.09668	2.15509	0.869207	1.09668
ENSMUSG00000039349	C130074G19Rik	0.00703782	0.135419	0.166539	0.0617945	5.46057	0.0195123	0.00488727	0.00936869	0.00471853	0.00936869	1.12236	2.15256	0.868321	1.12236
ENSMUSG00000019868	Vta1	0.00703439	0.135419	-0.129164	0.0479234	5.58961	0.00650484	0.00423145	-0.00165432	0.00434272	0.00434272	0.914361	2.15277	0.868321	0.914361
ENSMUSG00000031546	Gins4	0.00706089	0.135436	-0.0896799	0.0332893	6.78921	0.0135424	0.00103862	0.00309856	0.00255053	0.00309856	0.939731	2.15114	0.868267	0.939731
ENSMUSG00000028517	Plpp3	0.00706499	0.135436	0.126569	0.0469859	7.56331	0.0493143	0.000560633	0.00768136	0.00219579	0.00768136	1.09169	2.15089	0.868267	1.09169
ENSMUSG00000024812	Tjp2	0.00706475	0.135436	-0.105957	0.0393341	7.44135	0.0330478	0.000630096	0.005146	0.00222738	0.005146	0.929188	2.1509	0.868267	0.929188
ENSMUSG00000030007	Cct7	0.00709303	0.135805	-0.0697785	0.0259164	8.6415	0.0136165	0.000221494	0.00228604	0.00227137	0.00228604	0.952784	2.14917	0.867085	0.952784
ENSMUSG00000041219	Arhgap11a	0.00710516	0.135869	-0.0704625	0.026176	7.90345	0.00678609	0.000406739	0.00163825	0.00215128	0.00215128	0.952333	2.14843	0.866881	0.952333
ENSMUSG00000022754	Tmem45a	0.00713383	0.136248	0.48633	0.180756	2.89527	0.21116	0.0802226	0.0417558	0.0403591	0.0417558	1.40088	2.14668	0.865669	1.40088
ENSMUSG00000028837	Psmb2	0.00716137	0.136558	-0.0781131	0.0290465	6.98486	0.00812635	0.000727031	0.00218829	0.00242277	0.00242277	0.947296	2.145	0.864681	0.947296
ENSMUSG00000022945	Chaf1b	0.00716775	0.136558	-0.0951489	0.0353852	6.0269	0.0143279	0.00126334	0.00107198	0.0034112	0.0034112	0.936176	2.14462	0.864681	0.936176
ENSMUSG00000093674	Rpl41	0.00718664	0.136597	-0.121127	0.0450609	9.42217	0.0268909	0.000124398	0.00745606	0.00276903	0.00745606	0.919469	2.14347	0.864558	0.919469
ENSMUSG00000029581	Fscn1	0.0071929	0.136597	-0.0863413	0.0321237	7.76502	0.00985496	0.000324162	0.00352837	0.00216178	0.00352837	0.941908	2.1431	0.864558	0.941908
ENSMUSG00000069806	Cacng7	0.00720515	0.136597	0.0975148	0.0362885	6.41614	0.0289262	0.00202861	0.0028376	0.00288764	0.00288764	1.06993	2.14236	0.864558	1.06993
ENSMUSG00000031029	Eif3f	0.0071969	0.136597	0.0769024	0.0286139	6.58485	0.00386907	0.000333566	0.00262975	0.00272311	0.00272311	1.05475	2.14285	0.864558	1.05475
ENSMUSG00000078851	H2aw	0.00722897	0.13682	0.226851	0.0844535	5.40022	0.0357999	0.00488042	0.0217472	0.00491172	0.0217472	1.17028	2.14092	0.863851	1.17028
ENSMUSG00000020456	Ogdh	0.0072346	0.13682	-0.0718822	0.0267633	8.04355	0.00385898	0.000522964	0.00102767	0.00215113	0.00215113	0.951396	2.14059	0.863851	0.951396
ENSMUSG00000057315	Arhgap24	0.00725902	0.137114	0.237455	0.0884468	5.28191	0.159325	0.00592629	0.023279	0.00532655	0.023279	1.17891	2.13912	0.862919	1.17891
ENSMUSG00000040254	Sema3d	0.00730355	0.137686	-0.105166	0.0392018	5.75636	0.0133126	0.00180644	0.00279816	0.00393086	0.00393086	0.929698	2.13647	0.861109	0.929698
ENSMUSG00000038594	Cep85l	0.00730715	0.137686	0.144164	0.0537421	5.17061	0.0174634	0.00253208	0.0082506	0.00576531	0.0082506	1.10509	2.13625	0.861109	1.10509
ENSMUSG00000031558	Slit2	0.00741954	0.138045	0.160869	0.060084	5.83029	0.0295892	0.0070503	0.00642734	0.00377369	0.00642734	1.11796	2.12962	0.85998	1.11796
ENSMUSG00000081752	Sms-ps	0.00744547	0.138045	-0.135383	0.0505871	6.25109	0.0305029	0.00501944	0.00453437	0.00307667	0.00453437	0.910428	2.12811	0.85998	0.910428
ENSMUSG00000039001	Rps21	0.00738544	0.138045	-0.119143	0.044474	8.32954	0.0258358	0.000273539	0.00711076	0.00218371	0.00711076	0.920734	2.13162	0.85998	0.920734
ENSMUSG00000073016	Uprt	0.00737867	0.138045	0.186061	0.0694451	4.75644	0.0349139	0.0100753	0.00377071	0.00792917	0.00792917	1.13765	2.13202	0.85998	1.13765
ENSMUSG00000061689	Dlgap4	0.00734161	0.138045	-0.0804355	0.0300028	7.11921	0.00412717	0.00100839	0.00106575	0.00235222	0.00235222	0.945772	2.13421	0.85998	0.945772
ENSMUSG00000078490	Cfap74	0.00747806	0.138045	-0.250461	0.0936382	5.07096	0.0521675	0.0124105	0.0203238	0.00620312	0.0203238	0.840628	2.12621	0.85998	0.840628
ENSMUSG00000037896	Rcor1	0.00746216	0.138045	0.0720917	0.0269453	7.37428	0.00407855	0.000462172	0.00202939	0.00224841	0.00224841	1.05124	2.12714	0.85998	1.05124
ENSMUSG00000033545	Znrf1	0.00743743	0.138045	0.112126	0.0418913	5.77887	0.00697596	0.00266998	-0.000200935	0.00388157	0.00388157	1.08082	2.12858	0.85998	1.08082
ENSMUSG00000003032	Klf4	0.00743691	0.138045	0.463213	0.173059	4.65745	0.223952	0.00298184	0.108829	0.0085985	0.108829	1.37861	2.12861	0.85998	1.37861
ENSMUSG00000021361	Tmem14c	0.00739197	0.138045	-0.0862384	0.0321947	6.91878	0.0108627	0.00108205	0.00278756	0.0024623	0.00278756	0.941976	2.13124	0.85998	0.941976
ENSMUSG00000043162	Pyurf	0.0074693	0.138045	-0.119572	0.044697	5.61269	0.00744372	0.00317806	0.000586416	0.00428047	0.00428047	0.920461	2.12672	0.85998	0.920461
ENSMUSG00000038037	Socs1	0.0073724	0.138045	0.233168	0.0870181	4.25892	0.0963928	0.0141512	0.0141182	0.0120319	0.0141182	1.17541	2.13239	0.85998	1.17541
ENSMUSG00000024792	Zfpl1	0.00736067	0.138045	-0.128771	0.0480476	5.45656	0.0107153	0.00388768	0.00106059	0.00473099	0.00473099	0.91461	2.13308	0.85998	0.91461
ENSMUSG00000022956	Atp5o	0.0074385	0.138045	-0.102188	0.038179	7.19087	0.0121928	0.000464244	0.00497759	0.00231935	0.00497759	0.931619	2.12851	0.85998	0.931619
ENSMUSG00000034664	Itga2b	0.00742242	0.138045	0.362211	0.135291	2.96094	0.0726355	0.0301593	-0.00893427	0.0381744	0.0381744	1.28539	2.12945	0.85998	1.28539
ENSMUSG00000001248	Gramd1a	0.00745383	0.138045	0.0897173	0.0335284	6.19315	0.0124268	0.00104342	0.00199816	0.00315343	0.00315343	1.06416	2.12762	0.85998	1.06416
ENSMUSG00000050822	Slc29a4	0.00746728	0.138045	-0.174546	0.0652447	5.25517	0.0205885	0.00773719	0.0081551	0.00542744	0.0081551	0.886046	2.12684	0.85998	0.886046
ENSMUSG00000005410	Mcm5	0.00749113	0.138121	-0.0693749	0.0259424	8.64208	0.00726201	0.000240987	0.00131719	0.00227158	0.00227158	0.953051	2.12545	0.85974	0.953051
ENSMUSG00000024608	Rps14	0.00750336	0.138182	-0.118198	0.0442088	9.44305	0.0231744	0.000108351	0.00718814	0.00278883	0.00718814	0.921338	2.12474	0.85955	0.921338
ENSMUSG00000018548	Trim37	0.00753663	0.138629	-0.104782	0.0392127	6.37903	0.00899534	0.00281349	0.00149646	0.00292702	0.00292702	0.929945	2.12282	0.858146	0.929945
ENSMUSG00000005198	Polr2a	0.00755309	0.138767	-0.126018	0.0471725	8.29046	0.0112132	0.000252555	0.00805502	0.00217662	0.00805502	0.916357	2.12188	0.857715	0.916357
ENSMUSG00000025203	Scd2	0.00758413	0.139171	-0.0764303	0.0286251	9.65282	0.00653799	4.8625e-05	0.000965946	0.00301046	0.00301046	0.948401	2.12009	0.85645	0.948401
ENSMUSG00000062797	Hikeshi	0.00764266	0.140079	-0.110272	0.0413397	6.06123	0.0129188	0.00302578	0.00292401	0.00335438	0.00335438	0.926413	2.11676	0.853626	0.926413
ENSMUSG00000030189	Ybx3	0.0077311	0.141532	-0.0769438	0.0288872	7.40436	0.00864551	0.000376708	0.00273865	0.00223865	0.00273865	0.948064	2.11176	0.849145	0.948064
ENSMUSG00000021771	Vdac2	0.00775094	0.14156	-0.0841095	0.0315877	7.36706	0.0124064	0.00069373	0.00303132	0.00225083	0.00303132	0.943367	2.11065	0.849059	0.943367
ENSMUSG00000042348	Arl15	0.0077467	0.14156	0.10433	0.039179	5.97254	0.0142182	0.00222598	0.00146418	0.00350466	0.00350466	1.075	2.11088	0.849059	1.075
ENSMUSG00000101431	Gm7901	0.00779747	0.142174	0.43341	0.162892	3.05862	0.132677	0.0639661	0.00948345	0.0350938	0.0350938	1.35042	2.10805	0.847179	1.35042
ENSMUSG00000074918	Inafm2	0.00782529	0.142174	0.108688	0.0408675	5.92991	0.00841703	0.00265399	0.00286743	0.00358124	0.00358124	1.07825	2.1065	0.847179	1.07825
ENSMUSG00000035678	Tnfsf9	0.00782101	0.142174	0.320509	0.120506	3.95678	0.104929	0.0231493	0.0310649	0.015664	0.0310649	1.24877	2.10674	0.847179	1.24877
ENSMUSG00000042029	Ncapg2	0.00782095	0.142174	-0.107115	0.0402732	6.84483	0.0121247	0.0034405	0.0026147	0.00251082	0.0026147	0.928443	2.10674	0.847179	0.928443
ENSMUSG00000024050	Wiz	0.00783057	0.142174	-0.0716153	0.0269302	7.76056	0.00249896	0.000545257	0.000750542	0.00216229	0.00216229	0.951572	2.10621	0.847179	0.951572
ENSMUSG00000020219	Timm13	0.00784895	0.14234	-0.156415	0.058836	5.63389	0.0287152	0.00377173	0.00915184	0.00422469	0.00915184	0.897252	2.10519	0.846672	0.897252
ENSMUSG00000030545	Pex11a	0.00787218	0.142572	0.262166	0.0986512	4.45659	0.0817198	0.0261618	0.00585808	0.0101712	0.0101712	1.19928	2.1039	0.845966	1.19928
ENSMUSG00000053801	Grwd1	0.00788016	0.142572	-0.0839716	0.031602	6.86826	0.00883117	0.00123349	0.0012942	0.00249493	0.00249493	0.943457	2.10346	0.845966	0.943457
ENSMUSG00000020186	Csrp2	0.00789269	0.142632	-0.116816	0.0439717	7.52364	0.0394267	0.000833585	0.00638486	0.00220514	0.00638486	0.92222	2.10277	0.845784	0.92222
ENSMUSG00000063804	Lin28b	0.007922	0.142994	-0.3776	0.142202	6.20777	0.223185	0.00137498	0.0741183	0.00313343	0.0741183	0.769717	2.10117	0.844683	0.769717
ENSMUSG00000040771	Oard1	0.00795988	0.14351	-0.114596	0.0431824	6.25474	0.0138839	0.00214125	0.00482038	0.00307204	0.00482038	0.923641	2.09909	0.843118	0.923641
ENSMUSG00000022322	Shcbp1	0.00797674	0.143646	-0.0762904	0.0287557	7.10428	0.00704817	0.000727599	0.00142443	0.00235946	0.00235946	0.948493	2.09817	0.842705	0.948493
ENSMUSG00000004562	Arhgef40	0.00799512	0.14381	0.0857993	0.0323493	6.9287	0.00759849	0.00145071	0.000401115	0.00245615	0.00245615	1.06128	2.09717	0.842212	1.06128
ENSMUSG00000058571	Gpc6	0.0080122	0.143949	0.123737	0.0466657	6.73801	0.0265819	0.00151635	0.00661367	0.00258974	0.00661367	1.08955	2.09625	0.84179	1.08955
ENSMUSG00000039047	Pigk	0.00804321	0.144339	-0.122928	0.0463837	5.92145	0.0100063	0.00443523	0.00331716	0.00359683	0.00359683	0.918322	2.09457	0.840617	0.918322
ENSMUSG00000037994	Slc9b2	0.00807636	0.144766	-0.357575	0.134992	3.59485	0.212324	0.0462981	-8.82439e-05	0.0217338	0.0217338	0.780475	2.09278	0.839335	0.780475
ENSMUSG00000022051	Bnip3l	0.00812275	0.145163	0.158862	0.0600177	6.22922	0.0186853	0.00386773	0.00958022	0.00310488	0.00958022	1.11641	2.0903	0.838143	1.11641
ENSMUSG00000002102	Psmc3	0.00812379	0.145163	-0.0732393	0.02767	7.56137	0.00708261	0.000662129	0.00128446	0.00219622	0.00219622	0.950501	2.09024	0.838143	0.950501
ENSMUSG00000061650	Med9	0.00812674	0.145163	-0.0996426	0.037647	6.1423	0.0106308	0.00206468	0.00238273	0.00322657	0.00322657	0.933264	2.09008	0.838143	0.933264
ENSMUSG00000021133	Susd6	0.00815504	0.145501	0.139998	0.0529175	6.02075	0.0162291	0.00167251	0.00878179	0.00342156	0.00878179	1.1019	2.08857	0.837135	1.1019
ENSMUSG00000071796	6820431F20Rik	0.00818151	0.145637	0.0662364	0.025047	8.43604	0.00443646	0.000134763	0.00190449	0.00220735	0.00220735	1.04698	2.08717	0.83673	1.04698
ENSMUSG00000054079	Utp18	0.00817876	0.145637	-0.0868494	0.0328403	6.88435	0.0057248	0.00104469	0.00298165	0.00248431	0.00298165	0.941577	2.08731	0.83673	0.941577
ENSMUSG00000032959	Pebp1	0.00820045	0.145806	-0.0659109	0.0249313	7.99301	0.00864041	0.000170553	0.00198498	0.00214997	0.00214997	0.955342	2.08616	0.836226	0.955342
ENSMUSG00000027829	Ccnl1	0.00824487	0.146241	0.0939831	0.0355744	7.15928	0.00886149	0.00173476	0.00298992	0.00233347	0.00298992	1.06731	2.08382	0.834932	1.06731
ENSMUSG00000030956	Fam53b	0.00824659	0.146241	-0.165643	0.0627007	5.44653	0.0315727	0.00991469	0.00450435	0.00476243	0.00476243	0.891531	2.08373	0.834932	0.891531
ENSMUSG00000053453	Thoc7	0.00825331	0.146241	-0.079311	0.0300247	6.95353	0.00580605	0.000924443	0.00200231	0.00244109	0.00244109	0.94651	2.08337	0.834932	0.94651
ENSMUSG00000015943	Bola1	0.00827662	0.146486	-0.211365	0.080045	4.9736	0.0506619	0.00927175	0.0146485	0.00667728	0.0146485	0.86372	2.08215	0.834205	0.86372
ENSMUSG00000038346	Zfp384	0.00831053	0.146918	0.0797143	0.0302041	7.37447	0.00462856	0.00115752	0.001586	0.00224835	0.00224835	1.05681	2.08037	0.832926	1.05681
ENSMUSG00000004655	Aqp1	0.00837139	0.147656	0.639318	0.242468	3.6859	1.22221	0.0431953	0.17629	0.0200072	0.17629	1.55759	2.0772	0.83075	1.55759
ENSMUSG00000004328	Hif3a	0.00836443	0.147656	0.208681	0.0791359	4.62463	0.0526464	0.0145447	0.00321398	0.00883527	0.00883527	1.15563	2.07756	0.83075	1.15563
ENSMUSG00000025068	Gsto1	0.0084054	0.148087	-0.0981786	0.0372547	6.2056	0.0179381	0.00204516	0.00101976	0.00313638	0.00313638	0.934212	2.07544	0.829484	0.934212
ENSMUSG00000040118	Cacna2d1	0.00843954	0.148519	0.177604	0.0674286	5.72727	0.0239378	0.00457379	0.0124003	0.00399661	0.0124003	1.131	2.07368	0.828219	1.131
ENSMUSG00000053553	3110082I17Rik	0.00845057	0.148543	-0.110887	0.042106	5.69261	0.0204725	0.00254076	0.00208824	0.00407811	0.00407811	0.926019	2.07311	0.828146	0.926019
ENSMUSG00000113262	Gm48551	0.00847568	0.148816	0.416892	0.158363	3.35475	0.101369	0.0666208	-0.0171008	0.0270068	0.0270068	1.33505	2.07183	0.827352	1.33505
ENSMUSG00000075279	Mrpl23-ps1	0.00863225	0.150878	-0.11721	0.0446297	5.96025	0.0217489	0.00390969	0.00315793	0.00352642	0.00352642	0.921969	2.06388	0.821373	0.921969
ENSMUSG00000085342	Gm12254	0.00862103	0.150878	0.418271	0.159236	3.33268	0.0924938	0.0671161	-0.0323102	0.0275471	0.0275471	1.33632	2.06444	0.821373	1.33632
ENSMUSG00000007029	Vars	0.00864199	0.150878	-0.0842856	0.0320978	6.85792	0.0126813	0.000868928	0.00297741	0.00250189	0.00297741	0.943251	2.06339	0.821373	0.943251
ENSMUSG00000006715	Gmnn	0.00864087	0.150878	-0.0965503	0.0367678	6.59775	0.0210573	0.00124578	0.00380122	0.00271118	0.00380122	0.935267	2.06344	0.821373	0.935267
ENSMUSG00000055762	Eef1d	0.00863105	0.150878	-0.0851184	0.0324096	8.04574	0.0193012	0.000562337	0.00335909	0.00215121	0.00335909	0.942707	2.06394	0.821373	0.942707
ENSMUSG00000063457	Rps15	0.00865349	0.150909	-0.111429	0.042442	9.02657	0.0203821	0.000157594	0.00656734	0.00246199	0.00656734	0.925671	2.06281	0.821286	0.925671
ENSMUSG00000022704	Qtrt2	0.00872196	0.151668	0.153804	0.0586419	5.62268	0.0146501	0.00858447	0.000600709	0.00425399	0.00425399	1.1125	2.05939	0.819105	1.1125
ENSMUSG00000039844	Rapgef1	0.0087265	0.151668	-0.0703161	0.0268117	7.99338	0.00377691	0.000533803	0.000835164	0.00214997	0.00214997	0.952429	2.05916	0.819105	0.952429
ENSMUSG00000020153	Ndufs7	0.00871099	0.151668	-0.117015	0.0446079	6.48493	0.0181958	0.00161597	0.00581286	0.00281817	0.00581286	0.922093	2.05993	0.819105	0.922093
ENSMUSG00000028640	Tfap2c	0.00873687	0.151678	0.183784	0.0700883	6.56539	0.0342351	0.00183571	0.0165038	0.00274123	0.0165038	1.13586	2.05864	0.819078	1.13586
ENSMUSG00000021127	Zfp36l1	0.00875134	0.151759	0.113454	0.0432764	7.59426	0.0213524	0.000401058	0.0065909	0.00218911	0.0065909	1.08182	2.05793	0.818847	1.08182
ENSMUSG00000078566	Bnip3	0.00878169	0.152035	0.200128	0.0763719	5.06759	0.0446814	0.00247957	0.0192957	0.00621871	0.0192957	1.1488	2.05642	0.818057	1.1488
ENSMUSG00000021385	Ippk	0.00878694	0.152035	-0.123646	0.047189	5.56155	0.0126374	0.00389301	0.00286263	0.00442037	0.00442037	0.917865	2.05616	0.818057	0.917865
ENSMUSG00000021190	Lgmn	0.00880859	0.152239	0.100612	0.0384106	6.07781	0.0299269	0.00218059	0.00118168	0.00332747	0.00332747	1.07223	2.05509	0.817475	1.07223
ENSMUSG00000032218	Ccnb2	0.00883805	0.152577	-0.0725986	0.0277278	7.37858	0.0085155	0.000623328	0.00203991	0.00224698	0.00224698	0.950924	2.05364	0.81651	0.950924
ENSMUSG00000050071	Bex1	0.00885128	0.152635	-0.144554	0.0552209	6.49935	0.0386755	0.00134832	0.0100359	0.00280409	0.0100359	0.904659	2.05299	0.816345	0.904659
ENSMUSG00000041781	Cpsf2	0.00894222	0.152698	-0.0699207	0.0267459	7.75969	0.00537561	0.000438901	0.00223172	0.0021624	0.00223172	0.95269	2.04855	0.816167	0.95269
ENSMUSG00000000555	Itga5	0.0089004	0.152698	0.0847209	0.0323875	6.78365	0.00658052	0.0013614	0.00225932	0.00255467	0.00255467	1.06048	2.05059	0.816167	1.06048
ENSMUSG00000017404	Rpl19	0.00890428	0.152698	-0.0812364	0.0310572	9.12313	0.0141025	9.68768e-05	0.0035041	0.00252568	0.0035041	0.945247	2.0504	0.816167	0.945247
ENSMUSG00000003868	Ruvbl2	0.00895373	0.152698	-0.111024	0.0424757	6.46989	0.0186838	0.00128543	0.0054502	0.00283301	0.0054502	0.925931	2.048	0.816167	0.925931
ENSMUSG00000041515	Irf8	0.00892758	0.152698	0.374131	0.143081	3.14607	0.0845784	0.0439163	0.00153391	0.0325133	0.0325133	1.29606	2.04927	0.816167	1.29606
ENSMUSG00000040105	Plpp6	0.00891954	0.152698	0.157237	0.060126	5.10224	0.0131389	0.0074357	-0.00148656	0.00606082	0.00606082	1.11515	2.04966	0.816167	1.11515
ENSMUSG00000028140	Mrpl9	0.00892316	0.152698	-0.0898919	0.0343757	6.80315	0.00892256	0.00187134	0.00083984	0.0025403	0.0025403	0.939593	2.04948	0.816167	0.939593
ENSMUSG00000107470	Gm3375	0.00894607	0.152698	-0.114825	0.043925	6.67343	0.0123918	0.0014643	0.00573882	0.00264308	0.00573882	0.923494	2.04837	0.816167	0.923494
ENSMUSG00000039220	Ppp1r10	0.00888288	0.152698	-0.116005	0.0443353	5.79133	0.0111818	0.00218085	0.00515745	0.00385484	0.00515745	0.92274	2.05145	0.816167	0.92274
ENSMUSG00000004285	Atp6v1f	0.00893956	0.152698	-0.0936431	0.0358188	6.37476	0.00735718	0.00185816	-0.000197372	0.00293165	0.00293165	0.937153	2.04868	0.816167	0.937153
ENSMUSG00000030275	Etnk1	0.0090565	0.153266	0.0687166	0.0263291	7.56679	0.0197191	0.000393015	0.000721429	0.00219501	0.00219501	1.04878	2.04304	0.814554	1.04878
ENSMUSG00000028334	Nans	0.0090481	0.153266	-0.154894	0.059341	6.72758	0.0313051	0.00451168	0.00863471	0.00259805	0.00863471	0.898199	2.04344	0.814554	0.898199
ENSMUSG00000001403	Ube2c	0.00901854	0.153266	-0.0688396	0.0263617	8.52331	0.00680339	0.000362914	0.000362901	0.00223153	0.00223153	0.953405	2.04486	0.814554	0.953405
ENSMUSG00000034949	Zfr2	0.00903364	0.153266	0.306967	0.117577	3.79364	0.0958637	0.0334675	0.0158267	0.0181432	0.0181432	1.2371	2.04414	0.814554	1.2371
ENSMUSG00000029625	Cpsf4	0.00900152	0.153266	-0.0807981	0.0309335	6.94678	0.0035857	0.00112722	5.29056e-05	0.00244513	0.00244513	0.945534	2.04568	0.814554	0.945534
ENSMUSG00000054715	Zscan22	0.00904731	0.153266	0.12262	0.0469762	5.74255	0.00992184	0.00427681	0.00165223	0.00396178	0.00396178	1.08871	2.04348	0.814554	1.08871
ENSMUSG00000059040	Eno1b	0.00902942	0.153266	-0.113484	0.043465	9.73782	0.0312374	0.000110345	0.00694269	0.00311281	0.00694269	0.924353	2.04434	0.814554	0.924353
ENSMUSG00000048537	Phldb1	0.00911385	0.154068	-0.112335	0.0430774	7.17425	0.00973005	0.0046011	0.00165282	0.00232671	0.00232671	0.925089	2.0403	0.812288	0.925089
ENSMUSG00000019790	Stxbp5	0.0091734	0.154905	0.17383	0.0667161	5.09123	0.0392795	0.0105069	0.00522719	0.00611035	0.00611035	1.12805	2.03747	0.809934	1.12805
ENSMUSG00000021728	Emb	0.00919833	0.155157	-0.140624	0.0539907	5.82733	0.276454	0.00165858	0.00922408	0.00377972	0.00922408	0.907127	2.03629	0.80923	0.907127
ENSMUSG00000007603	Dus3l	0.00921349	0.155243	-0.085796	0.0329474	6.58894	0.0067593	0.00133333	0.0027164	0.00271932	0.00271932	0.942265	2.03558	0.808989	0.942265
ENSMUSG00000026828	Galnt5	0.00923538	0.155442	0.41453	0.159238	4.24474	0.186058	0.0152202	0.0794448	0.0121784	0.0794448	1.33286	2.03455	0.808431	1.33286
ENSMUSG00000024122	Pdpk1	0.00925543	0.15561	0.0994216	0.0382028	5.97597	0.00820412	0.0015845	0.00386412	0.00349862	0.00386412	1.07134	2.0336	0.807962	1.07134
ENSMUSG00000022139	Mbnl2	0.00928885	0.155976	0.0841999	0.0323692	7.27117	0.0219358	0.00098352	0.00292813	0.00228595	0.00292813	1.0601	2.03204	0.806941	1.0601
ENSMUSG00000079396	Gm3411	0.00929741	0.155976	-0.142795	0.0549018	6.40145	0.0385395	0.00309321	0.00815984	0.00290305	0.00815984	0.905763	2.03164	0.806941	0.905763
ENSMUSG00000062328	Rpl17	0.00933434	0.156298	-0.0790862	0.0304229	9.46694	0.0104228	0.000111473	0.00334393	0.00281197	0.00334393	0.946657	2.02992	0.806048	0.946657
ENSMUSG00000032463	Faim	0.00933679	0.156298	-0.127506	0.0490507	5.80465	0.0136137	0.0051556	0.00136719	0.00382668	0.00382668	0.915413	2.0298	0.806048	0.915413
ENSMUSG00000036022	Fam122b	0.00938192	0.156883	-0.118303	0.0455394	5.76855	0.00758168	0.00383834	-0.000326996	0.003904	0.003904	0.921271	2.02771	0.804423	0.921271
ENSMUSG00000067150	Xpo5	0.00939292	0.156897	-0.0669726	0.0257843	7.58029	0.00522103	0.000289984	0.0015925	0.00219206	0.00219206	0.954639	2.0272	0.804385	0.954639
ENSMUSG00000027630	Tbl1xr1	0.00941994	0.157179	0.222664	0.085758	4.80564	0.0307915	0.0198361	0.000160265	0.00762042	0.00762042	1.16689	2.02595	0.803606	1.16689
ENSMUSG00000023809	Rps6ka2	0.00945123	0.157531	-0.0957775	0.0369044	5.92527	0.00931153	0.00149479	0.00103925	0.00358977	0.00358977	0.935768	2.02451	0.802635	0.935768
ENSMUSG00000105944	Gm5075	0.0094829	0.157888	0.64556	0.248854	2.11227	0.17274	0.156912	-0.105571	0.0742866	0.0742866	1.56435	2.02306	0.80165	1.56435
ENSMUSG00000029108	Pcdh7	0.00952593	0.158434	0.146103	0.0563545	5.84103	0.0349693	0.00423353	0.0076229	0.00375194	0.0076229	1.10658	2.02109	0.800152	1.10658
ENSMUSG00000063787	Chchd1	0.0095895	0.15932	-0.0898102	0.0346719	6.39503	0.0123575	0.00157813	0.00249852	0.00290985	0.00290985	0.939646	2.0182	0.79773	0.939646
ENSMUSG00000029405	G3bp2	0.00965084	0.160167	-0.0664632	0.0256803	8.12293	0.00647304	0.000306336	0.00175072	0.00215572	0.00215572	0.954976	2.01543	0.795428	0.954976
ENSMUSG00000053552	Ebf4	0.00967805	0.160446	0.209669	0.0810431	4.84479	0.138917	0.0101929	0.0143275	0.00738556	0.0143275	1.15642	2.01421	0.794672	1.15642
ENSMUSG00000069744	Psmb3	0.00976855	0.161169	-0.0853678	0.0330381	7.39877	0.011787	0.000674167	0.00340084	0.00224043	0.00340084	0.942544	2.01017	0.792719	0.942544
ENSMUSG00000022031	Elp3	0.00977381	0.161169	-0.0667048	0.0258172	7.9899	0.00595935	0.000338438	0.000828328	0.00214994	0.00214994	0.954816	2.00994	0.792719	0.954816
ENSMUSG00000038084	Opa1	0.00975294	0.161169	-0.0738529	0.0285757	7.4937	0.00592413	0.000835739	0.00173579	0.00221278	0.00221278	0.950097	2.01086	0.792719	0.950097
ENSMUSG00000094347	Olfr784	0.0097682	0.161169	-0.12807	0.0495642	5.25571	0.0204088	0.00374597	0.00490079	0.00542537	0.00542537	0.915055	2.01019	0.792719	0.915055
ENSMUSG00000007038	Neu1	0.00973685	0.161169	0.138827	0.053704	5.35893	0.0170803	0.00571651	0.00163746	0.00505088	0.00505088	1.10101	2.01158	0.792719	1.10101
ENSMUSG00000032330	Cox7a2	0.00980095	0.161444	-0.0858359	0.033234	6.43404	0.0140343	0.0012543	0.00049524	0.00286916	0.00286916	0.942238	2.00873	0.791978	0.942238
ENSMUSG00000002602	Axl	0.00981716	0.161539	0.137095	0.0530924	5.15735	0.0915117	0.00373359	0.00678994	0.00582098	0.00678994	1.09969	2.00801	0.791723	1.09969
ENSMUSG00000000339	Rtca	0.00983207	0.161582	-0.0958541	0.0371286	5.85032	0.0093496	0.00141318	0.00166762	0.00373333	0.00373333	0.935718	2.00736	0.791608	0.935718
ENSMUSG00000021285	Ppp1r13b	0.00984917	0.161582	0.202475	0.078446	4.77516	0.0506977	0.00728735	0.0156867	0.00780986	0.0156867	1.15067	2.0066	0.791608	1.15067
ENSMUSG00000029772	Ahcyl2	0.00985114	0.161582	0.235878	0.0913897	4.93283	0.0451925	0.0156554	0.0155257	0.00689109	0.0155257	1.17762	2.00651	0.791608	1.17762
ENSMUSG00000038060	Dlec1	0.00986577	0.16165	0.6994	0.271033	3.42803	0.344388	0.214746	0.0595007	0.0252817	0.0595007	1.62383	2.00587	0.791424	1.62383
ENSMUSG00000029231	Pdgfra	0.00991514	0.162287	0.0696198	0.0269972	7.42989	0.0126746	0.000490253	0.00187961	0.00223079	0.00223079	1.04944	2.0037	0.789717	1.04944
ENSMUSG00000024186	Rgs11	0.00993319	0.16241	0.442236	0.171532	3.41087	0.767575	0.0841709	-0.00624893	0.0256765	0.0256765	1.35871	2.00291	0.789386	1.35871
ENSMUSG00000013629	Cad	0.00994477	0.162428	-0.152708	0.0592411	5.95918	0.0219364	0.00237669	0.0107255	0.00352832	0.0107255	0.89956	2.00241	0.78934	0.89956
ENSMUSG00000000530	Acvrl1	0.00997028	0.162529	0.160683	0.0623563	5.03434	0.0123919	0.00814065	-0.00213645	0.00637568	0.00637568	1.11782	2.00129	0.789068	1.11782
ENSMUSG00000022385	Gtse1	0.00997204	0.162529	-0.0797245	0.0309394	6.84647	0.0143834	0.00106402	0.0023936	0.00250969	0.00250969	0.946238	2.00122	0.789068	0.946238
ENSMUSG00000059291	Rpl11	0.00999223	0.162687	-0.0826726	0.0320922	9.06665	0.0157585	0.000151749	0.00369324	0.00248761	0.00369324	0.944307	2.00034	0.788647	0.944307
ENSMUSG00000082860	Gm13204	0.0100237	0.162856	0.345662	0.134237	3.44307	0.105628	0.0364648	0.0308083	0.0249406	0.0308083	1.27073	1.99897	0.788195	1.27073
ENSMUSG00000010095	Slc3a2	0.010019	0.162856	-0.0973703	0.0378112	6.19218	0.0396738	0.00218272	0.000327115	0.00315477	0.00315477	0.934735	1.99917	0.788195	0.934735
ENSMUSG00000055652	Klhl25	0.0100356	0.162878	-0.106308	0.041291	5.82533	0.00710823	0.00258132	0.00259192	0.0037838	0.0037838	0.928962	1.99846	0.788139	0.928962
ENSMUSG00000030056	Isy1	0.0100978	0.163716	-0.122467	0.0476071	5.76395	0.0198997	0.00454725	-0.00101864	0.00391409	0.00391409	0.918615	1.99577	0.785909	0.918615
ENSMUSG00000032038	St3gal4	0.010117	0.163855	0.182091	0.0708027	4.56355	0.0306635	0.00941893	0.00794429	0.00929636	0.00929636	1.13453	1.99495	0.78554	1.13453
ENSMUSG00000072915	Gm12258	0.0102094	0.164661	0.141736	0.0551792	5.49173	0.0407312	0.00674378	0.00132171	0.00462328	0.00462328	1.10323	1.991	0.783409	1.10323
ENSMUSG00000039607	Rbms3	0.0101962	0.164661	0.194487	0.0757021	5.83927	0.0510271	0.00280378	0.0185912	0.00375548	0.0185912	1.14432	1.99156	0.783409	1.14432
ENSMUSG00000092074	Dynlt1a	0.0102009	0.164661	-0.158564	0.0617233	6.34957	0.0282379	0.0100632	0.00415993	0.00295942	0.00415993	0.895917	1.99136	0.783409	0.895917
ENSMUSG00000087153	Gm6483	0.0102069	0.164661	0.292593	0.113905	3.67038	0.0406337	0.0281462	-0.00760386	0.0202916	0.0202916	1.22484	1.99111	0.783409	1.22484
ENSMUSG00000048696	Mex3d	0.0102316	0.164846	-0.0814991	0.0317376	7.03773	0.00908373	0.000820482	0.00294001	0.00239352	0.00294001	0.945075	1.99006	0.78292	0.945075
ENSMUSG00000034206	Polq	0.0102695	0.165285	-0.117038	0.0456001	6.69946	0.0160049	0.0036237	0.00413928	0.00262104	0.00413928	0.922079	1.98845	0.781766	0.922079
ENSMUSG00000030512	Snrpa1	0.010306	0.165405	-0.0781988	0.0304823	6.5959	0.0105089	0.000756015	0.00118239	0.00271288	0.00271288	0.94724	1.98691	0.781451	0.94724
ENSMUSG00000037805	Rpl10a	0.0102975	0.165405	-0.111981	0.043646	8.74008	0.0225415	0.000686859	0.00642503	0.00231106	0.00642503	0.925316	1.98727	0.781451	0.925316
ENSMUSG00000027855	Sycp1	0.0103143	0.165405	0.302051	0.117754	4.10916	0.0745151	0.0359902	0.0157758	0.0136886	0.0157758	1.2329	1.98656	0.781451	1.2329
ENSMUSG00000024683	Mrpl16	0.0103198	0.165405	-0.0998055	0.0389117	6.65508	0.012072	0.00271458	0.00293812	0.00265907	0.00293812	0.933159	1.98633	0.781451	0.933159
ENSMUSG00000027677	Ttc14	0.010335	0.165478	0.108015	0.0421208	6.52045	0.00991773	0.0023268	0.00429674	0.00278374	0.00429674	1.07774	1.98569	0.78126	1.07774
ENSMUSG00000026836	Acvr1	0.0103655	0.165794	0.101161	0.0394636	6.36071	0.00722415	0.00286715	0.00218099	0.00294705	0.00294705	1.07264	1.98441	0.78043	1.07264
ENSMUSG00000033845	Mrpl15	0.0104244	0.166563	-0.108123	0.0422122	7.03144	0.0173997	0.00291138	0.00374093	0.00239689	0.00374093	0.927794	1.98195	0.778421	0.927794
ENSMUSG00000028069	Gpatch4	0.0104363	0.166582	-0.0914396	0.0357043	6.5186	0.00705359	0.00171198	0.00304725	0.00278551	0.00304725	0.938586	1.98145	0.778371	0.938586
ENSMUSG00000022899	Slc15a2	0.0104541	0.166694	-0.933405	0.36455	4.29756	0.983914	0.0311306	0.465016	0.0116419	0.465016	0.523621	1.98071	0.778079	0.523621
ENSMUSG00000036712	Cyld	0.0104902	0.166847	0.0978247	0.0382241	6.26993	0.00858333	0.00240168	0.000514448	0.00305304	0.00305304	1.07016	1.97922	0.777682	1.07016
ENSMUSG00000001151	Pcnt	0.0104991	0.166847	-0.140044	0.0547272	6.05845	0.018549	0.00387924	0.00730234	0.00335892	0.00730234	0.907492	1.97885	0.777682	0.907492
ENSMUSG00000031375	Bgn	0.0104854	0.166847	0.227026	0.0887031	6.48556	0.0896091	0.00138274	0.027992	0.00281755	0.027992	1.17042	1.97941	0.777682	1.17042
ENSMUSG00000060935	Tmem263	0.0105069	0.166847	0.0949616	0.0371134	6.85648	0.00815517	0.00071162	0.0044307	0.00250286	0.0044307	1.06804	1.97853	0.777682	1.06804
ENSMUSG00000028661	Epha8	0.0105214	0.166906	0.434022	0.169659	3.90702	2.42557	0.0910822	-0.0219575	0.0163784	0.0163784	1.35099	1.97793	0.777528	1.35099
ENSMUSG00000032285	Dnaja4	0.0105592	0.167048	0.277125	0.108381	3.93501	0.0784365	0.0278811	0.00560179	0.0159722	0.0159722	1.21178	1.97637	0.77716	1.21178
ENSMUSG00000026634	Angel2	0.0105504	0.167048	-0.0913589	0.0357255	7.05329	0.00605609	0.0021647	0.00260019	0.00238529	0.00260019	0.938638	1.97673	0.77716	0.938638
ENSMUSG00000033542	Arhgef5	0.0105628	0.167048	0.199777	0.0781344	5.63435	0.0437216	0.00789307	0.0148989	0.00422351	0.0148989	1.14852	1.97622	0.77716	1.14852
ENSMUSG00000022098	Bmp1	0.0106167	0.167557	0.0929342	0.0363725	7.74701	0.0247113	0.000597997	0.00434104	0.00216391	0.00434104	1.06654	1.97401	0.775838	1.06654
ENSMUSG00000060679	Mrps9	0.0106228	0.167557	-0.0812332	0.0317955	6.79265	0.0119831	0.00122622	0.00240029	0.002548	0.002548	0.945249	1.97376	0.775838	0.945249
ENSMUSG00000026049	Tex30	0.0106275	0.167557	-0.114903	0.044977	5.94428	0.0109057	0.00399718	0.00351986	0.00355509	0.00355509	0.923444	1.97357	0.775838	0.923444
ENSMUSG00000075592	Nynrin	0.0106446	0.167656	-0.0946428	0.0370545	8.69182	0.0107825	0.00265949	0.00246651	0.00229088	0.00246651	0.936504	1.97287	0.775581	0.936504
ENSMUSG00000028889	Yrdc	0.0106701	0.167885	-0.16313	0.0638894	4.95932	0.019068	0.00848783	0.00290162	0.00675112	0.00675112	0.893085	1.97183	0.774988	0.893085
ENSMUSG00000036144	Meox2	0.010754	0.168862	0.392147	0.153748	3.99966	0.832728	0.0203681	0.0678816	0.0150764	0.0678816	1.31235	1.96843	0.772467	1.31235
ENSMUSG00000020627	Klhl29	0.0107528	0.168862	0.125799	0.0493207	5.91088	0.0589242	0.00532559	0.00375586	0.00361649	0.00375586	1.09111	1.96848	0.772467	1.09111
ENSMUSG00000047909	Ankrd16	0.0107694	0.168865	0.121359	0.04759	6.17648	0.0113947	0.0032636	0.00519167	0.00317678	0.00519167	1.08776	1.96781	0.77246	1.08776
ENSMUSG00000025155	Dus1l	0.0107761	0.168865	-0.0894475	0.0350791	6.9536	0.00724154	0.00215299	0.00064198	0.00244105	0.00244105	0.939883	1.96754	0.77246	0.939883
ENSMUSG00000034430	Zxdc	0.0108001	0.16907	0.168486	0.0660961	5.67735	0.0296098	0.0121946	0.00341917	0.00411515	0.00411515	1.12388	1.96657	0.771935	1.12388
ENSMUSG00000022220	Adcy4	0.0108147	0.169127	0.28589	0.112174	5.6146	0.0884478	0.0271025	0.019874	0.00427538	0.019874	1.21916	1.96599	0.771787	1.21916
ENSMUSG00000053293	Pom121	0.0108363	0.169293	-0.0656164	0.0257528	8.26031	0.00247076	0.000304244	0.00135159	0.00217173	0.00217173	0.955537	1.96512	0.77136	0.955537
ENSMUSG00000038816	Ctnnal1	0.0108627	0.169534	-0.131542	0.0516443	4.92834	0.0181393	0.00304206	0.000497065	0.00691523	0.00691523	0.912855	1.96406	0.770742	0.912855
ENSMUSG00000058741	Prr19	0.0109216	0.170282	-0.920024	0.361474	1.66304	0.631905	0.200445	0.287367	0.101658	0.287367	0.5285	1.96171	0.768831	0.5285
ENSMUSG00000020386	Sar1b	0.010954	0.170615	-0.106982	0.0420501	5.7809	0.0194365	0.00200888	0.00459243	0.00387719	0.00459243	0.928528	1.96043	0.767983	0.928528
ENSMUSG00000040521	Tsfm	0.0109915	0.171027	-0.10819	0.0425449	5.71027	0.0113043	0.00272144	-9.9794e-05	0.00403614	0.00403614	0.927751	1.95894	0.766936	0.927751
ENSMUSG00000032786	Alas1	0.0111426	0.171209	0.108625	0.0427963	6.91943	0.0101536	0.00437577	0.00189326	0.0024619	0.0024619	1.0782	1.95301	0.766473	1.0782
ENSMUSG00000032584	Mst1r	0.0111517	0.171209	0.657588	0.259106	3.87799	0.591429	0.233829	-0.0174593	0.016812	0.016812	1.57744	1.95266	0.766473	1.57744
ENSMUSG00000027984	Hadh	0.0110969	0.171209	-0.0688803	0.0271221	7.96104	0.00611573	0.000596335	0.00213399	0.00214994	0.00214994	0.953378	1.9548	0.766473	0.953378
ENSMUSG00000039795	Zfand1	0.0111748	0.171209	-0.127633	0.0503049	5.39832	0.00905851	0.00452949	0.00106448	0.00491801	0.00491801	0.915332	1.95176	0.766473	0.915332
ENSMUSG00000090733	Rps27	0.0111577	0.171209	0.0921877	0.036327	8.71373	0.0177364	0.00258024	0.00234645	0.00229986	0.00234645	1.06599	1.95242	0.766473	1.06599
ENSMUSG00000032040	Dcps	0.0110603	0.171209	-0.0905541	0.0356401	6.59709	0.0146794	0.00203037	0.000910831	0.00271178	0.00271178	0.939162	1.95623	0.766473	0.939162
ENSMUSG00000027376	Prom2	0.011112	0.171209	-0.261994	0.103182	4.63996	0.0868415	0.0301023	0.00964441	0.00872374	0.00964441	0.833934	1.95421	0.766473	0.833934
ENSMUSG00000039308	Ndst2	0.0110712	0.171209	0.130471	0.0513577	6.60264	0.0127939	0.00714042	0.00115217	0.00270666	0.00270666	1.09465	1.9558	0.766473	1.09465
ENSMUSG00000041671	Pyroxd1	0.0111011	0.171209	-0.135364	0.0533036	5.78524	0.0131265	0.00673956	0.00170424	0.00386785	0.00386785	0.91044	1.95463	0.766473	0.91044
ENSMUSG00000083844	Ube2d-ps	0.0111805	0.171209	-0.197452	0.0778287	4.56083	0.0311194	0.0132964	0.00411092	0.00931755	0.00931755	0.87209	1.95154	0.766473	0.87209
ENSMUSG00000026662	Sephs1	0.0110987	0.171209	-0.0673654	0.0265262	7.75277	0.0037074	0.000463717	0.00187048	0.00216321	0.00216321	0.954379	1.95473	0.766473	0.954379
ENSMUSG00000087370	Tmem170b	0.0111232	0.171209	0.168228	0.0662629	5.24899	0.0210537	0.010941	0.00405532	0.00545117	0.00545117	1.12368	1.95377	0.766473	1.12368
ENSMUSG00000071553	Cpa2	0.0111737	0.171209	-0.44267	0.17447	4.169	0.214931	0.0308559	0.0827864	0.012995	0.0827864	0.735772	1.9518	0.766473	0.735772
ENSMUSG00000054146	Krt15	0.0111107	0.171209	0.370135	0.145768	4.74506	0.702034	0.00990228	0.0694252	0.00800279	0.0694252	1.29247	1.95426	0.766473	1.29247
ENSMUSG00000042436	Mfap4	0.0111259	0.171209	0.119826	0.0471994	7.71199	0.0178103	0.00087418	0.00744288	0.00216856	0.00744288	1.0866	1.95367	0.766473	1.0866
ENSMUSG00000052539	Magi3	0.0110961	0.171209	0.103215	0.0406412	6.29079	0.0121071	0.00171766	0.00444871	0.00302759	0.00444871	1.07416	1.95483	0.766473	1.07416
ENSMUSG00000085442	Gm3362	0.0111919	0.171214	0.455804	0.179687	3.38688	0.123719	0.0943025	-0.0320384	0.0262376	0.0262376	1.37155	1.9511	0.766462	1.37155
ENSMUSG00000093904	Tomm20	0.0112332	0.171676	-0.152959	0.0603302	8.39961	0.0259018	0.00253406	0.0110543	0.00219854	0.0110543	0.899404	1.9495	0.76529	0.899404
ENSMUSG00000027324	Rpusd2	0.0112707	0.171755	-0.130307	0.0514196	5.66822	0.0207006	0.00364375	0.0062271	0.00413765	0.0062271	0.913637	1.94805	0.76509	0.913637
ENSMUSG00000028882	Ppp1r8	0.0112717	0.171755	-0.0818801	0.0323106	6.53228	0.00316013	0.00112505	-0.000548105	0.00277245	0.00277245	0.944826	1.94801	0.76509	0.944826
ENSMUSG00000030796	Tead2	0.0112629	0.171755	-0.0836527	0.0330065	7.3857	0.0358534	0.000993405	0.00307378	0.00224465	0.00307378	0.943665	1.94835	0.76509	0.943665
ENSMUSG00000048040	Arxes2	0.0113402	0.172417	-0.0915462	0.0361551	6.46205	0.00468748	0.00203936	0.00105235	0.00284083	0.00284083	0.938516	1.94538	0.76342	0.938516
ENSMUSG00000048007	Timm8a1	0.0113623	0.172417	-0.125185	0.0494537	6.26203	0.0224974	0.00338023	0.00575025	0.00306287	0.00575025	0.916887	1.94453	0.76342	0.916887
ENSMUSG00000022390	Zc3h7b	0.0113497	0.172417	-0.0971889	0.0383881	8.22155	0.0088208	0.00264329	0.00285833	0.00216617	0.00285833	0.934853	1.94502	0.76342	0.934853
ENSMUSG00000004896	Rrnad1	0.0113274	0.172417	0.120841	0.0477173	6.01068	0.0151055	0.00422804	0.00427253	0.00343863	0.00427253	1.08737	1.94587	0.76342	1.08737
ENSMUSG00000036223	Ska1	0.011371	0.172417	-0.128769	0.050875	6.33622	0.0207397	0.00448117	0.0051817	0.00297447	0.0051817	0.914611	1.9442	0.76342	0.914611
ENSMUSG00000091228	Gm20390	0.0114034	0.17274	-0.117837	0.0465745	7.32729	0.0409586	0.00284751	0.00525078	0.00226473	0.00525078	0.921568	1.94296	0.762608	0.921568
ENSMUSG00000029804	Herc3	0.0115365	0.174465	0.314939	0.124678	3.6536	0.0985559	0.0374302	0.015688	0.0206034	0.0206034	1.24396	1.93793	0.758293	1.24396
ENSMUSG00000052062	Pard3b	0.0115399	0.174465	0.171359	0.0678406	4.58438	0.0235165	0.00781503	0.00936704	0.00913606	0.00936704	1.12612	1.9378	0.758293	1.12612
ENSMUSG00000022972	Cfap298	0.0116089	0.175336	-0.184699	0.0731825	4.63528	0.0259647	0.0112369	0.00206434	0.00875762	0.00875762	0.879833	1.93521	0.75613	0.879833
ENSMUSG00000036046	5031439G07Rik	0.0116947	0.175367	-0.0871166	0.0345533	7.4075	0.0104149	0.00104252	0.00341481	0.00223767	0.00341481	0.941402	1.93201	0.756052	0.941402
ENSMUSG00000041642	Kif21b	0.0117341	0.175367	-0.103168	0.0409391	6.07339	0.00776151	0.00056507	0.00569203	0.00333461	0.00569203	0.930986	1.93055	0.756052	0.930986
ENSMUSG00000027998	Plrg1	0.0116992	0.175367	-0.0739417	0.0293293	7.17969	0.00601727	0.000887147	0.00173515	0.00232429	0.00232429	0.950039	1.93184	0.756052	0.950039
ENSMUSG00000035891	Cerk	0.0116756	0.175367	0.0916933	0.0363603	6.53726	0.01366	0.00216801	0.00228093	0.00276771	0.00276771	1.06562	1.93272	0.756052	1.06562
ENSMUSG00000044636	Csrnp2	0.0117071	0.175367	0.0735364	0.0291712	7.08254	0.00909429	0.000806654	0.00223685	0.00237026	0.00237026	1.05229	1.93155	0.756052	1.05229
ENSMUSG00000021453	Gadd45g	0.0116381	0.175367	0.143374	0.0568283	5.55887	0.201981	0.00397658	0.00808007	0.00442789	0.00808007	1.10449	1.93412	0.756052	1.10449
ENSMUSG00000024565	Sall3	0.0116513	0.175367	-0.918962	0.364301	1.94764	0.609176	0.185879	0.309592	0.0835572	0.309592	0.528889	1.93363	0.756052	0.528889
ENSMUSG00000037857	Nufip2	0.011752	0.175367	0.136865	0.0543223	6.11128	0.0143575	0.00199818	0.00901856	0.00327417	0.00901856	1.09951	1.92989	0.756052	1.09951
ENSMUSG00000028480	Glipr2	0.0117575	0.175367	-0.175212	0.0695469	6.33672	0.029113	0.00172352	0.0163338	0.00297391	0.0163338	0.885637	1.92969	0.756052	0.885637
ENSMUSG00000027405	Nop56	0.0117231	0.175367	-0.0735018	0.0291631	7.76889	0.00633418	0.00101379	0.00207835	0.00216135	0.00216135	0.950329	1.93096	0.756052	0.950329
ENSMUSG00000057531	Dtnbp1	0.0117685	0.175367	-0.0948375	0.0376487	6.31807	0.0169279	0.00229639	0.000219778	0.00299533	0.00299533	0.936378	1.92928	0.756052	0.936378
ENSMUSG00000032449	Slc25a36	0.0117698	0.175367	0.0939441	0.0372946	6.46418	0.0239154	0.00227465	0.00291801	0.0028387	0.00291801	1.06728	1.92923	0.756052	1.06728
ENSMUSG00000038387	Rras	0.0116798	0.175367	0.209183	0.0829542	3.80227	0.0204271	0.00768848	0.00349045	0.0180021	0.0180021	1.15603	1.93256	0.756052	1.15603
ENSMUSG00000113651	Gm4900	0.0116966	0.175367	0.547256	0.217064	2.48188	0.151055	0.11957	-0.0603466	0.0563335	0.0563335	1.4613	1.93194	0.756052	1.4613
ENSMUSG00000061762	Tac1	0.0118009	0.17566	0.611196	0.242727	3.37974	0.665064	0.0765697	0.143384	0.0264068	0.143384	1.52753	1.92809	0.755327	1.52753
ENSMUSG00000070493	Chchd2	0.011885	0.175662	-0.0843693	0.0335392	8.9916	0.0120767	0.000255419	0.00394413	0.00244058	0.00394413	0.943197	1.925	0.755321	0.943197
ENSMUSG00000038112	AW551984	0.0118916	0.175662	0.407794	0.162123	5.27327	0.319158	0.00589674	0.0922294	0.00535884	0.0922294	1.32666	1.92476	0.755321	1.32666
ENSMUSG00000052698	Tln2	0.0118831	0.175662	-0.113936	0.045292	7.04562	0.0256341	0.000899234	0.00675918	0.00238932	0.00675918	0.924063	1.92507	0.755321	0.924063
ENSMUSG00000002307	Daxx	0.011892	0.175662	-0.122117	0.0485492	5.48328	0.00898897	0.00415074	-0.000874342	0.00464881	0.00464881	0.918838	1.92475	0.755321	0.918838
ENSMUSG00000036450	Hif1an	0.0118916	0.175662	-0.0698636	0.027775	7.21415	0.00352464	0.000570764	0.00177726	0.00230932	0.00230932	0.952728	1.92476	0.755321	0.952728
ENSMUSG00000058594	Fbh1	0.0118873	0.175662	0.102116	0.040595	6.45032	0.0074472	0.00329975	0.00194024	0.0028526	0.0028526	1.07335	1.92492	0.755321	1.07335
ENSMUSG00000045538	Ddx28	0.0118174	0.175662	-0.107715	0.0427858	5.84111	0.00792212	0.00308255	0.00277615	0.00375177	0.00375177	0.928057	1.92748	0.755321	0.928057
ENSMUSG00000020432	Tcn2	0.0118539	0.175662	0.117853	0.046833	5.64363	0.0153599	0.00398882	-0.000673702	0.00419961	0.00419961	1.08512	1.92614	0.755321	1.08512
ENSMUSG00000032599	Ip6k2	0.011938	0.176006	0.082193	0.0326945	6.80866	0.00722221	0.00145435	0.00121444	0.00253632	0.00253632	1.05863	1.92307	0.754473	1.05863
ENSMUSG00000003746	Man1a	0.011935	0.176006	0.184538	0.0734023	4.5961	0.0426682	0.0110675	0.00899475	0.00904728	0.00904728	1.13645	1.92318	0.754473	1.13645
ENSMUSG00000039361	Picalm	0.0119895	0.176597	0.0664887	0.0264637	8.28779	0.00344115	0.000438386	0.000960283	0.00217617	0.00217617	1.04716	1.9212	0.753017	1.04716
ENSMUSG00000021943	Gdf10	0.0120394	0.177163	0.973542	0.387713	2.30174	1.74214	0.168428	0.392771	0.0646134	0.392771	1.96366	1.91939	0.751628	1.96366
ENSMUSG00000033475	Tomm6	0.0120956	0.177636	-0.0990962	0.0394909	6.96966	0.0164094	0.00100708	0.00481516	0.00243156	0.00481516	0.933618	1.91737	0.750469	0.933618
ENSMUSG00000046785	Epm2aip1	0.0121176	0.177636	0.0851443	0.0339396	7.38243	0.0195413	0.000463954	0.00383646	0.00224572	0.00383646	1.06079	1.91658	0.750469	1.06079
ENSMUSG00000037376	Trmt6	0.0121028	0.177636	-0.0862013	0.034355	6.45649	0.00978227	0.00155992	0.000490254	0.0028464	0.0028464	0.942	1.91712	0.750469	0.942
ENSMUSG00000031714	Gab1	0.0121291	0.177636	0.0742764	0.0296115	7.26812	0.00897733	0.000711682	0.00256185	0.00228716	0.00256185	1.05283	1.91617	0.750469	1.05283
ENSMUSG00000030272	Camk1	0.012125	0.177636	0.095934	0.0382438	6.15732	0.0189035	0.00225597	0.00224016	0.00320436	0.00320436	1.06876	1.91632	0.750469	1.06876
ENSMUSG00000030357	Fkbp4	0.0122047	0.178575	-0.0673689	0.0268812	8.90295	0.00851146	0.000307581	0.00233935	0.00239013	0.00239013	0.954377	1.91347	0.74818	0.954377
ENSMUSG00000046380	Jrk	0.0122164	0.178577	-0.114785	0.0458071	6.02215	0.0144923	0.00259321	0.0052404	0.0034192	0.0052404	0.92352	1.91306	0.748174	0.92352
ENSMUSG00000028673	Fuca1	0.0122328	0.178632	0.216362	0.0863596	4.60204	0.0344796	0.0188405	-0.000796645	0.00900265	0.00900265	1.1618	1.91248	0.748042	1.1618
ENSMUSG00000028295	Smim8	0.0122433	0.178632	-0.155289	0.0619904	5.02133	0.018169	0.00764045	0.00670602	0.00643864	0.00670602	0.897952	1.9121	0.748042	0.897952
ENSMUSG00000018819	Lsp1	0.0122828	0.178872	-0.230675	0.0921257	5.58351	0.355373	0.011404	0.0202814	0.00435942	0.0202814	0.852236	1.9107	0.747458	0.852236
ENSMUSG00000024642	Tle4	0.0123005	0.178872	0.0697445	0.0278599	7.32428	0.0176607	0.000631889	0.00218789	0.00226582	0.00226582	1.04953	1.91008	0.747458	1.04953
ENSMUSG00000022676	Snai2	0.0123061	0.178872	0.151788	0.0606365	6.84513	0.0362743	0.00113388	0.0125928	0.00251061	0.0125928	1.11095	1.90988	0.747458	1.11095
ENSMUSG00000038648	Creb3l2	0.0122908	0.178872	0.080632	0.0322054	6.75468	0.0153712	0.00112738	0.00274479	0.00257668	0.00274479	1.05748	1.91042	0.747458	1.05748
ENSMUSG00000038065	Mturn	0.0123523	0.179375	0.236201	0.094408	3.41804	0.081208	0.00776376	0.0039794	0.0255109	0.0255109	1.17789	1.90825	0.746238	1.17789
ENSMUSG00000028081	Rps3a1	0.0124045	0.179626	-0.100843	0.0403303	8.35279	0.0222529	0.00029465	0.00577775	0.00218832	0.00577775	0.932488	1.90642	0.74563	0.932488
ENSMUSG00000021532	Fastkd3	0.0124013	0.179626	-0.195484	0.0781774	4.87674	0.0307952	0.0156162	0.00557798	0.00720081	0.00720081	0.87328	1.90653	0.74563	0.87328
ENSMUSG00000022551	Cyc1	0.012402	0.179626	-0.0880742	0.0352227	6.71796	0.00763753	0.00202589	0.00228994	0.00260582	0.00260582	0.940778	1.90651	0.74563	0.940778
ENSMUSG00000084372	Gm13988	0.0124484	0.180094	0.673882	0.269642	1.94052	0.270265	0.187462	-0.0234201	0.0839769	0.0839769	1.59536	1.90489	0.744501	1.59536
ENSMUSG00000031756	Cenpn	0.0124782	0.180355	-0.0904606	0.0362085	6.51301	0.00701584	0.00210372	0.00123548	0.00279088	0.00279088	0.939223	1.90385	0.743871	0.939223
ENSMUSG00000028565	Nfia	0.0124919	0.180386	0.32321	0.129391	6.6685	0.206367	0.0205637	0.0419397	0.00264733	0.0419397	1.25111	1.90337	0.743798	1.25111
ENSMUSG00000003072	Atp5d	0.0125216	0.180399	-0.0675687	0.0270589	7.55912	0.0107469	0.000536764	0.00192568	0.00219673	0.00219673	0.954245	1.90234	0.743765	0.954245
ENSMUSG00000039704	Lmbrd2	0.0125279	0.180399	0.104684	0.0419255	5.41132	0.00653771	0.00168695	0.00239238	0.0048753	0.0048753	1.07526	1.90212	0.743765	1.07526
ENSMUSG00000027323	Rad51	0.0125103	0.180399	-0.104498	0.0418425	5.94004	0.0138958	0.00297355	0.000178053	0.00356276	0.00356276	0.930128	1.90273	0.743765	0.930128
ENSMUSG00000075053	Vdac3-ps1	0.0125531	0.180593	0.53173	0.213015	3.2654	0.21952	0.0681543	0.101248	0.0292547	0.101248	1.44566	1.90125	0.743298	1.44566
ENSMUSG00000030341	Tnfrsf1a	0.0125659	0.18061	0.113744	0.0455735	5.11117	0.00735966	0.00173291	0.0029838	0.00602102	0.00602102	1.08203	1.90081	0.743259	1.08203
ENSMUSG00000004113	Cacna1b	0.0125779	0.180615	-0.501589	0.200997	3.94511	0.340815	0.134998	-0.0467315	0.0158284	0.0158284	0.706328	1.90039	0.743246	0.706328
ENSMUSG00000024481	Lvrn	0.0126826	0.181949	0.286698	0.115022	3.71337	0.0976413	0.0192042	0.0301877	0.019514	0.0301877	1.21985	1.89679	0.740051	1.21985
ENSMUSG00000030079	Ruvbl1	0.0126958	0.18197	-0.0817823	0.0328155	7.20255	0.0132148	0.000507374	0.00351288	0.00231428	0.00351288	0.94489	1.89634	0.740001	0.94489
ENSMUSG00000039347	Atp6v0e2	0.012709	0.18199	-0.144862	0.0581351	5.41806	0.0236881	0.00776413	0.000977665	0.00485338	0.00485338	0.904466	1.89589	0.739952	0.904466
ENSMUSG00000052911	Lamb2	0.0127427	0.182134	0.165817	0.0665694	4.71777	0.0316881	0.00836139	0.00673855	0.00818284	0.00818284	1.1218	1.89474	0.739608	1.1218
ENSMUSG00000057134	Ado	0.0127426	0.182134	0.0705944	0.0283411	7.29933	0.00551838	0.000723616	0.000550378	0.00227506	0.00227506	1.05015	1.89474	0.739608	1.05015
ENSMUSG00000040549	Ckap5	0.0127783	0.182475	-0.0769025	0.0308859	8.14908	0.00878212	0.000447004	0.00311438	0.00215798	0.00311438	0.948091	1.89353	0.738796	0.948091
ENSMUSG00000106831	Ube2n-ps1	0.0127965	0.182566	-0.0871185	0.034996	6.58139	0.0079052	0.00184598	0.000980997	0.00272632	0.00272632	0.941401	1.89291	0.738581	0.941401
ENSMUSG00000059588	Calcrl	0.0128314	0.182603	0.296567	0.119179	6.29292	0.0681046	0.0135401	0.039487	0.00302503	0.039487	1.22822	1.89172	0.738491	1.22822
ENSMUSG00000030811	Fbxl19	0.0128385	0.182603	-0.0683946	0.0274874	8.26209	0.00410229	0.000648738	0.00165745	0.002172	0.002172	0.953699	1.89149	0.738491	0.953699
ENSMUSG00000024939	Fam89b	0.0128464	0.182603	-0.105441	0.0423799	6.61121	0.00965545	0.00201959	0.00468569	0.00269877	0.00468569	0.929521	1.89122	0.738491	0.929521
ENSMUSG00000024335	Brd2	0.0128169	0.182603	0.0677621	0.0272266	7.18839	0.0023526	0.000447041	0.000526713	0.00232044	0.00232044	1.04809	1.89222	0.738491	1.04809
ENSMUSG00000033420	Antxr1	0.012894	0.183002	0.0860409	0.0346007	7.13172	0.0110884	0.000513911	0.00395566	0.00234626	0.00395566	1.06145	1.88961	0.737543	1.06145
ENSMUSG00000026773	Pfkfb3	0.01291	0.183002	0.215628	0.0867284	5.98892	0.0340493	0.00216946	0.025912	0.00347602	0.025912	1.16121	1.88907	0.737543	1.16121
ENSMUSG00000020929	Eftud2	0.0128987	0.183002	-0.0710571	0.0285765	6.87346	0.00722391	0.00055723	0.00137411	0.00249148	0.00249148	0.95194	1.88945	0.737543	0.95194
ENSMUSG00000004100	Ppan	0.0129463	0.183348	-0.0963584	0.0387722	6.4883	0.00745727	0.00185987	0.0037524	0.00281487	0.0037524	0.935391	1.88785	0.736723	0.935391
ENSMUSG00000025532	Crcp	0.0130263	0.183976	-0.130973	0.0527469	5.17513	0.0161487	0.00464056	0.00515763	0.00574647	0.00574647	0.913215	1.88518	0.735238	0.913215
ENSMUSG00000002844	Adprh	0.0130091	0.183976	-0.0699181	0.0281528	7.10132	0.00650824	0.000598057	0.00213515	0.00236092	0.00236092	0.952692	1.88575	0.735238	0.952692
ENSMUSG00000031099	Smarca1	0.0130174	0.183976	0.155515	0.0626244	6.50052	0.0305392	0.00116976	0.0134717	0.00280295	0.0134717	1.11382	1.88548	0.735238	1.11382
ENSMUSG00000035273	Hpse	0.0131051	0.184751	0.43452	0.175146	3.27896	0.153962	0.0297548	0.0847696	0.0289031	0.0847696	1.35146	1.88256	0.733414	1.35146
ENSMUSG00000059070	Rpl18	0.0131003	0.184751	-0.0904912	0.0364732	8.75306	0.0183597	0.000124266	0.00484217	0.00231674	0.00484217	0.939203	1.88272	0.733414	0.939203
ENSMUSG00000051367	Six1	0.0131321	0.184963	0.10194	0.041102	6.07234	0.0671558	0.00102457	0.00528242	0.00333631	0.00528242	1.07322	1.88166	0.732915	1.07322
ENSMUSG00000031840	Rab3a	0.0131549	0.185115	0.266938	0.107656	4.82412	0.053391	0.0171566	0.0261119	0.0075084	0.0261119	1.20325	1.88091	0.732559	1.20325
ENSMUSG00000006386	Tek	0.0131986	0.185561	0.126327	0.0509719	5.70273	0.0236348	0.00564578	0.00317565	0.00405393	0.00405393	1.09151	1.87947	0.731512	1.09151
ENSMUSG00000046997	Spsb4	0.0132337	0.18559	-0.240329	0.0970077	5.90911	0.0903078	0.00384735	0.0312851	0.0036198	0.0312851	0.846553	1.87832	0.731446	0.846553
ENSMUSG00000037660	Gdf7	0.0132487	0.18559	0.5711	0.23056	3.34206	0.628343	0.0547789	0.143677	0.0273163	0.143677	1.48566	1.87783	0.731446	1.48566
ENSMUSG00000068240	Gm11808	0.013236	0.18559	-0.081297	0.0328161	8.51571	0.0124289	0.000358641	0.00366176	0.00222924	0.00366176	0.945207	1.87824	0.731446	0.945207
ENSMUSG00000063696	Gm8730	0.0132422	0.18559	-0.0964154	0.0389213	9.06742	0.0179061	0.000129185	0.00552632	0.00248811	0.00552632	0.935354	1.87804	0.731446	0.935354
ENSMUSG00000033020	Polr2f	0.0133188	0.185926	-0.101001	0.0408065	6.48617	0.0194943	0.00248052	0.00373611	0.00281695	0.00373611	0.932386	1.87553	0.730659	0.932386
ENSMUSG00000048388	Fam171b	0.0133329	0.185926	0.158314	0.0639718	5.77588	0.0238026	0.00702389	0.00825437	0.00388803	0.00825437	1.11598	1.87508	0.730659	1.11598
ENSMUSG00000027353	Mcm8	0.0133222	0.185926	-0.107481	0.0434258	6.44742	0.00899675	0.00418479	0.0013138	0.00285554	0.00285554	0.928208	1.87542	0.730659	0.928208
ENSMUSG00000036860	Mrpl55	0.0132989	0.185926	-0.128924	0.0520764	5.23398	0.0261457	0.00461523	0.00511001	0.00550938	0.00550938	0.914513	1.87619	0.730659	0.914513
ENSMUSG00000028322	Exosc3	0.013304	0.185926	-0.0921986	0.037244	5.88584	0.00949215	0.00151467	5.5679e-05	0.0036639	0.0036639	0.938092	1.87602	0.730659	0.938092
ENSMUSG00000020572	Nampt	0.0133984	0.186671	-0.100478	0.04063	5.77344	0.0108862	0.00226961	0.00306092	0.00389335	0.00389335	0.932724	1.87295	0.728922	0.932724
ENSMUSG00000035901	Dennd5a	0.0134146	0.186729	0.0781394	0.0316025	6.47648	0.00612754	0.000902059	0.000127069	0.00282649	0.00282649	1.05566	1.87242	0.728789	1.05566
ENSMUSG00000038456	Dennd2a	0.0134779	0.187441	0.0786445	0.0318285	6.54177	0.00660125	0.00101862	0.000793717	0.00276344	0.00276344	1.05603	1.87038	0.727135	1.05603
ENSMUSG00000028678	Kif2c	0.0135909	0.187997	-0.078249	0.0317067	6.16697	0.00843326	0.000562817	0.00064865	0.00319037	0.00319037	0.947207	1.86675	0.725849	0.947207
ENSMUSG00000037225	Fgf2	0.0135493	0.187997	0.374	0.151479	2.6267	0.199969	0.0353842	0.0205708	0.05028	0.05028	1.29594	1.86808	0.725849	1.29594
ENSMUSG00000096722	Hmgb1-ps9	0.0135312	0.187997	0.459495	0.18607	2.84678	0.116498	0.0872247	-0.0106297	0.0420312	0.0420312	1.37506	1.86866	0.725849	1.37506
ENSMUSG00000027239	Mdk	0.0135893	0.187997	-0.0847142	0.0343258	9.34366	0.0135033	9.12865e-05	0.00430756	0.00269799	0.00430756	0.942971	1.8668	0.725849	0.942971
ENSMUSG00000038894	Irs2	0.0135664	0.187997	-0.116362	0.0471379	7.59645	0.0544997	0.000563648	0.00773176	0.00218866	0.00773176	0.922511	1.86754	0.725849	0.922511
ENSMUSG00000053178	Mterf1b	0.0135901	0.187997	0.25386	0.102864	3.81759	0.0415595	0.0217481	-0.00123046	0.0177542	0.0177542	1.19239	1.86678	0.725849	1.19239
ENSMUSG00000030249	Abcc9	0.0136275	0.188167	0.216222	0.087648	5.23436	0.0641609	0.00818046	0.0204997	0.00550791	0.0204997	1.16169	1.86558	0.725456	1.16169
ENSMUSG00000026277	Stk25	0.0136265	0.188167	0.0816324	0.0330902	6.64742	0.00765953	0.001422	0.00203301	0.00266586	0.00266586	1.05821	1.86562	0.725456	1.05821
ENSMUSG00000037465	Klf10	0.0136552	0.188381	0.157528	0.0638745	5.12277	0.0153799	0.00926195	0.00152431	0.00596985	0.00596985	1.11537	1.8647	0.724962	1.11537
ENSMUSG00000039452	Snx22	0.0136742	0.188474	0.221662	0.0898976	4.0484	0.0725554	0.015732	0.00725783	0.0144392	0.0144392	1.16608	1.8641	0.724748	1.16608
ENSMUSG00000064030	Pym1	0.0137053	0.188735	-0.100675	0.0408433	6.41362	0.0116514	0.00160658	0.00462128	0.00289027	0.00462128	0.932597	1.86311	0.724147	0.932597
ENSMUSG00000036112	Metap2	0.0137362	0.188823	-0.07934	0.0321985	7.74189	0.0101617	0.00170596	0.00200477	0.00216455	0.00216455	0.946491	1.86213	0.723944	0.946491
ENSMUSG00000062794	Zfp599	0.0137361	0.188823	-0.110971	0.0450354	5.65773	0.0177834	0.00340806	0.00202109	0.00416382	0.00416382	0.925964	1.86214	0.723944	0.925964
ENSMUSG00000030671	Pde3b	0.0137549	0.188913	-0.108982	0.0442368	5.64872	0.0127895	0.00311911	0.00300759	0.00418662	0.00418662	0.927242	1.86154	0.723738	0.927242
ENSMUSG00000031960	Aars	0.0137732	0.188996	-0.0892945	0.0362525	6.11559	0.00965243	0.00163911	0.0021712	0.00326741	0.00326741	0.939982	1.86097	0.723548	0.939982
ENSMUSG00000045382	Cxcr4	0.0137917	0.189082	0.302003	0.122634	5.05892	0.643609	0.00936733	0.0467784	0.00625915	0.0467784	1.23286	1.86038	0.72335	1.23286
ENSMUSG00000046185	Zfp84	0.0138394	0.189481	0.0978973	0.0397729	6.07409	0.00701241	0.00257223	0.00308876	0.00333349	0.00333349	1.07021	1.85888	0.722434	1.07021
ENSMUSG00000034203	Chchd4	0.0138453	0.189481	-0.110315	0.0448208	5.78458	0.0157161	0.00289409	0.00460584	0.00386926	0.00460584	0.926386	1.8587	0.722434	0.926386
ENSMUSG00000040952	Rps19	0.0139107	0.190207	-0.0821808	0.0334128	8.87228	0.0180814	0.000304743	0.00386321	0.00237391	0.00386321	0.944629	1.85665	0.720773	0.944629
ENSMUSG00000032220	Myo1e	0.0139621	0.19022	-0.120344	0.0489552	6.35235	0.0194651	0.00165794	0.00728941	0.00295632	0.00728941	0.919969	1.85505	0.720743	0.919969
ENSMUSG00000028645	Slc2a1	0.0139732	0.19022	0.116001	0.047194	6.04108	0.0349349	0.000665049	0.00765011	0.00338755	0.00765011	1.08373	1.8547	0.720743	1.08373
ENSMUSG00000020385	Clk4	0.0139628	0.19022	0.125332	0.0509849	6.31123	0.0176448	0.00197173	0.00773291	0.00300331	0.00773291	1.09076	1.85503	0.720743	1.09076
ENSMUSG00000019054	Fis1	0.0139631	0.19022	-0.075224	0.0306011	6.90145	0.00765896	0.00102274	0.00218596	0.00247326	0.00247326	0.949195	1.85502	0.720743	0.949195
ENSMUSG00000096403	Rnps1-ps	0.0139692	0.19022	-0.0807595	0.032855	7.14818	0.0112023	0.000927833	0.00310213	0.00233857	0.00310213	0.94556	1.85483	0.720743	0.94556
ENSMUSG00000052423	B4galt3	0.0140089	0.190436	0.127081	0.0517215	5.69095	0.0121091	0.00590497	0.00151456	0.00408211	0.00408211	1.09208	1.8536	0.720252	1.09208
ENSMUSG00000026825	Dnm1	0.0140137	0.190436	0.113708	0.046281	7.68326	0.0205278	0.00254105	0.00545549	0.00217287	0.00545549	1.08201	1.85345	0.720252	1.08201
ENSMUSG00000040037	Negr1	0.0140411	0.190641	0.31325	0.127534	3.39433	0.0864149	0.0346601	0.0182649	0.0260621	0.0260621	1.2425	1.8526	0.719783	1.2425
ENSMUSG00000010205	Raver1	0.0141019	0.191298	-0.0634847	0.0258629	8.08243	0.00245913	0.00034424	0.000991661	0.00215296	0.00215296	0.95695	1.85072	0.718291	0.95695
ENSMUSG00000094786	Gm14403	0.0141977	0.191601	0.214606	0.0875148	4.19522	0.0537154	0.0155377	0.0130553	0.0127049	0.0130553	1.16039	1.84778	0.717603	1.16039
ENSMUSG00000003429	Rps11	0.0141871	0.191601	-0.0730751	0.0297963	8.73131	0.0137505	0.000100187	0.00321433	0.00230729	0.00321433	0.95061	1.84811	0.717603	0.95061
ENSMUSG00000057278	Snrpg	0.0142312	0.191601	-0.132761	0.0541576	7.5537	0.0285564	0.00172262	0.00922742	0.00219797	0.00922742	0.912085	1.84676	0.717603	0.912085
ENSMUSG00000001666	Ddt	0.0142473	0.191601	-0.117309	0.0478624	5.81984	0.019508	0.00266988	0.00588247	0.00379509	0.00588247	0.921906	1.84627	0.717603	0.921906
ENSMUSG00000007655	Cav1	0.0142482	0.191601	0.327228	0.133511	2.83916	0.0743501	0.0242488	0.0213389	0.0422986	0.0422986	1.2546	1.84624	0.717603	1.2546
ENSMUSG00000000902	Smarcb1	0.0142042	0.191601	-0.0663557	0.0270612	7.83347	0.0041685	0.000402223	0.00233174	0.0021553	0.00233174	0.955047	1.84758	0.717603	0.955047
ENSMUSG00000020116	Pno1	0.0142048	0.191601	-0.105551	0.0430461	6.41914	0.0177291	0.00108422	0.00583353	0.00288452	0.00583353	0.92945	1.84756	0.717603	0.92945
ENSMUSG00000084129	Hmgb1-ps1	0.0141427	0.191601	0.609218	0.248294	2.30155	0.282962	0.165536	0.0365902	0.0646226	0.0646226	1.52543	1.84947	0.717603	1.52543
ENSMUSG00000027165	B230118H07Rik	0.0142421	0.191601	-0.133783	0.0545807	5.42785	0.0139539	0.00534862	0.00577319	0.00482179	0.00577319	0.911439	1.84643	0.717603	0.911439
ENSMUSG00000015839	Nfe2l2	0.0142215	0.191601	0.0839055	0.0342245	6.28915	0.00444183	0.00134336	0.000905845	0.00302956	0.00302956	1.05988	1.84705	0.717603	1.05988
ENSMUSG00000050708	Ftl1	0.0142638	0.191644	-0.067681	0.0276187	9.43606	0.00711625	6.55957e-05	0.0026895	0.00278216	0.00278216	0.954171	1.84576	0.717506	0.954171
ENSMUSG00000028896	Rcc1	0.0142902	0.191767	-0.123434	0.0503834	6.24629	0.0206049	0.00164837	0.00782865	0.00308278	0.00782865	0.918	1.84496	0.717227	0.918
ENSMUSG00000021660	Btf3	0.0142978	0.191767	-0.0692087	0.028252	8.95047	0.00777214	0.000133406	0.00284644	0.0024165	0.00284644	0.953161	1.84473	0.717227	0.953161
ENSMUSG00000028438	Kif24	0.0143442	0.192223	-0.132312	0.0540372	5.00903	0.0336061	0.00440246	0.00153567	0.00649895	0.00649895	0.912368	1.84332	0.716196	0.912368
ENSMUSG00000053007	Creb5	0.014358	0.19224	0.15075	0.0615762	5.19252	0.161323	0.0084805	0.00168608	0.00567491	0.00567491	1.11015	1.84291	0.716155	1.11015
ENSMUSG00000026790	Odf2	0.0143817	0.192391	-0.0775834	0.0316979	7.60969	0.00595579	0.00156512	0.00138466	0.00218598	0.00218598	0.947644	1.84219	0.715815	0.947644
ENSMUSG00000057605	Gm6807	0.0145078	0.19391	0.180461	0.0738251	4.71664	0.0340254	0.0102929	0.0100542	0.00819038	0.0100542	1.13325	1.8384	0.712399	1.13325
ENSMUSG00000030057	Cnbp	0.0145618	0.194128	-0.0615405	0.0251895	8.43757	0.00942272	0.000161115	0.00212159	0.00220773	0.00220773	0.95824	1.83679	0.711913	0.95824
ENSMUSG00000015092	Edf1	0.0145437	0.194128	-0.0799087	0.0327019	6.93482	0.00774782	0.00103677	0.00295572	0.00245239	0.00295572	0.946118	1.83732	0.711913	0.946118
ENSMUSG00000025580	Eif4a3	0.0145609	0.194128	-0.0720032	0.0294718	6.67382	0.0110244	0.000599983	0.00201925	0.00264274	0.00264274	0.951316	1.83681	0.711913	0.951316
ENSMUSG00000033207	Mamdc2	0.0146019	0.194495	-0.42029	0.172101	2.76167	0.18736	0.0654866	0.0273217	0.0450907	0.0450907	0.747275	1.83559	0.711092	0.747275
ENSMUSG00000033047	Eif3l	0.0146862	0.195125	-0.0633586	0.0259664	8.20678	0.00706123	0.000352941	0.00157516	0.00216427	0.00216427	0.957034	1.83309	0.709686	0.957034
ENSMUSG00000019467	Arhgef25	0.0147051	0.195125	0.09809	0.040208	6.89469	0.0149285	0.00178535	0.00425029	0.0024776	0.00425029	1.07036	1.83253	0.709686	1.07036
ENSMUSG00000045314	Sowahb	0.0146842	0.195125	-0.306036	0.125421	3.57562	0.284426	0.0366099	0.0107151	0.0221169	0.0221169	0.808861	1.83315	0.709686	0.808861
ENSMUSG00000032392	Parp16	0.014694	0.195125	-0.142361	0.0583486	4.90509	0.0113346	0.00566838	0.000281007	0.00704199	0.00704199	0.906035	1.83286	0.709686	0.906035
ENSMUSG00000026810	Dpm2	0.0147223	0.195125	-0.107892	0.0442338	5.75342	0.00922461	0.00336733	0.00218118	0.00393741	0.00393741	0.927943	1.83202	0.709686	0.927943
ENSMUSG00000032125	Robo4	0.014725	0.195125	0.130595	0.0535431	5.6138	0.0189445	0.00642545	0.00128047	0.0042775	0.0042775	1.09475	1.83194	0.709686	1.09475
ENSMUSG00000027613	Eif6	0.0147514	0.195175	-0.0979372	0.0401641	6.05432	0.0165074	0.000865064	0.00515738	0.00336569	0.00515738	0.934368	1.83117	0.709576	0.934368
ENSMUSG00000025980	Hspd1	0.0147563	0.195175	-0.095733	0.0392621	8.19018	0.0149648	0.000106591	0.00564839	0.00216228	0.00564839	0.935797	1.83102	0.709576	0.935797
ENSMUSG00000096847	Tmem151b	0.0147667	0.195175	0.0946817	0.038835	6.81285	0.0222639	0.00111252	0.00451792	0.0025333	0.00451792	1.06783	1.83072	0.709576	1.06783
ENSMUSG00000054863	Tafa5	0.0148134	0.195626	-0.126792	0.0520299	5.31126	0.0127251	0.00488758	0.00445687	0.00521895	0.00521895	0.915866	1.82934	0.708573	0.915866
ENSMUSG00000091337	Eid1	0.0148645	0.195966	0.102527	0.0420941	8.44609	0.0142394	0.000215027	0.00640011	0.00220991	0.00640011	1.07365	1.82785	0.70782	1.07365
ENSMUSG00000039081	Zfp503	0.0148595	0.195966	0.0962201	0.0395027	7.08892	0.187011	0.000818916	0.00500681	0.00236706	0.00500681	1.06897	1.828	0.70782	1.06897
ENSMUSG00000075227	Znhit2	0.0149444	0.19685	-0.125538	0.0515825	5.64802	0.0156149	0.00391805	0.00601543	0.00418839	0.00601543	0.916662	1.82552	0.705863	0.916662
ENSMUSG00000000094	Tbx4	0.015002	0.197274	0.270125	0.111056	4.41166	0.486532	0.0142645	0.0317801	0.0105654	0.0317801	1.20591	1.82385	0.704929	1.20591
ENSMUSG00000020547	Bzw2	0.0150149	0.197274	-0.0643891	0.0264756	7.16616	0.00455924	0.000286552	0.000871527	0.00233035	0.00233035	0.95635	1.82348	0.704929	0.95635
ENSMUSG00000019362	D8Ertd738e	0.0150134	0.197274	-0.0922421	0.0379276	7.03722	0.0128628	0.000880399	0.00449002	0.00239379	0.00449002	0.938064	1.82352	0.704929	0.938064
ENSMUSG00000027620	Rbm39	0.0150653	0.197438	0.0617132	0.0253879	7.81239	0.00201674	0.000249287	0.000612001	0.00215703	0.00215703	1.0437	1.82202	0.70457	1.0437
ENSMUSG00000079435	Rpl36a	0.0150912	0.197438	-0.0986303	0.0405856	8.45195	0.0184646	0.000547688	0.00560181	0.00221143	0.00560181	0.933919	1.82128	0.70457	0.933919
ENSMUSG00000010476	Ebf3	0.015046	0.197438	0.183078	0.0753012	7.58527	0.216847	0.000653711	0.0205153	0.00219099	0.0205153	1.1353	1.82258	0.70457	1.1353
ENSMUSG00000028030	Tbck	0.0150792	0.197438	0.0842282	0.0346551	6.12422	0.0110428	0.00122963	0.000325708	0.00325402	0.00325402	1.06012	1.82162	0.70457	1.06012
ENSMUSG00000049600	Zbtb45	0.0150821	0.197438	-0.170739	0.0702513	6.08674	0.0381079	0.00832975	0.0100952	0.00331312	0.0100952	0.888388	1.82154	0.70457	0.888388
ENSMUSG00000058897	Col25a1	0.0151418	0.197622	0.18083	0.0744474	5.86627	0.248843	0.00176372	0.0189279	0.00370183	0.0189279	1.13354	1.81982	0.704164	1.13354
ENSMUSG00000043872	Zmym1	0.0151437	0.197622	-0.136487	0.0561923	6.6537	0.0133156	0.00912797	0.000648671	0.00266029	0.00266029	0.909732	1.81977	0.704164	0.909732
ENSMUSG00000020149	Rab1a	0.0151201	0.197622	-0.0674843	0.0277772	7.86936	0.00273362	0.000727623	0.000981128	0.00215291	0.00215291	0.954301	1.82045	0.704164	0.954301
ENSMUSG00000091264	Smim13	0.0151757	0.197873	0.0803276	0.0330817	6.52838	0.00791351	0.00130959	0.000972135	0.00277616	0.00277616	1.05726	1.81885	0.703614	1.05726
ENSMUSG00000013584	Aldh1a2	0.0153589	0.198916	0.748527	0.308823	5.70073	1.07136	0.00486462	0.35119	0.0040587	0.35119	1.68008	1.81364	0.701331	1.68008
ENSMUSG00000042745	Id1	0.0154115	0.198916	0.136285	0.0562566	7.5981	0.0725892	0.000641286	0.011174	0.00218832	0.011174	1.09907	1.81215	0.701331	1.09907
ENSMUSG00000036040	Adamtsl2	0.0154432	0.198916	-0.65337	0.269785	2.1184	0.219867	0.19777	-0.0906052	0.0739574	0.0739574	0.635793	1.81126	0.701331	0.635793
ENSMUSG00000044211	Gm7887	0.015406	0.198916	-0.117157	0.0483581	6.01527	0.00954217	0.00529959	0.00212083	0.00343084	0.00343084	0.922003	1.81231	0.701331	0.922003
ENSMUSG00000022671	Mzt2	0.0154223	0.198916	-0.110924	0.0457927	5.60774	0.0123655	0.00353497	0.00389734	0.00429371	0.00429371	0.925995	1.81185	0.701331	0.925995
ENSMUSG00000020973	Dnaaf2	0.0153472	0.198916	-0.108692	0.0448384	6.22883	0.0119361	0.00440039	0.00281625	0.0031054	0.0031054	0.927429	1.81397	0.701331	0.927429
ENSMUSG00000071655	Ubxn1	0.015318	0.198916	-0.0660279	0.0272305	7.72908	0.00818144	0.000602069	0.00203815	0.00216621	0.00216621	0.955264	1.8148	0.701331	0.955264
ENSMUSG00000032374	Plod2	0.0153839	0.198916	0.118638	0.0489591	6.43497	0.0140509	0.00133196	0.0076168	0.00286821	0.0076168	1.08571	1.81293	0.701331	1.08571
ENSMUSG00000005057	Sh2b2	0.015445	0.198916	-0.101294	0.0418263	5.91214	0.00779075	0.00282193	0.00370931	0.00361413	0.00370931	0.932197	1.81121	0.701331	0.932197
ENSMUSG00000028902	Sf3a3	0.0153616	0.198916	-0.0659785	0.0272218	7.01632	0.00563591	0.000361372	0.00158883	0.00240512	0.00240512	0.955297	1.81356	0.701331	0.955297
ENSMUSG00000001440	Kpnb1	0.0152964	0.198916	-0.0633186	0.0261077	7.6652	0.00718444	0.000368876	0.0020396	0.00217581	0.00217581	0.95706	1.81541	0.701331	0.95706
ENSMUSG00000018076	Med13l	0.0154378	0.198916	0.0876736	0.0361997	7.10151	0.0120002	0.000927575	0.00396465	0.00236082	0.00396465	1.06266	1.81142	0.701331	1.06266
ENSMUSG00000057789	Bak1	0.0154575	0.198916	-0.132197	0.0545934	6.81706	0.0226988	0.00368565	0.00744132	0.00253029	0.00744132	0.912441	1.81086	0.701331	0.912441
ENSMUSG00000019883	Echdc1	0.0154616	0.198916	-0.147109	0.060754	5.19453	0.0222994	0.00811315	0.00135099	0.00566675	0.00566675	0.903059	1.81074	0.701331	0.903059
ENSMUSG00000027424	Mgme1	0.0153466	0.198916	-0.101685	0.0419477	5.93126	0.0109439	0.00299043	0.00112058	0.00357877	0.00357877	0.931944	1.81399	0.701331	0.931944
ENSMUSG00000073702	Rpl31	0.0152932	0.198916	-0.0886937	0.0365693	8.27879	0.0129208	0.000808088	0.00418455	0.00217467	0.00418455	0.940374	1.8155	0.701331	0.940374
ENSMUSG00000031262	Cenpi	0.0154851	0.199051	-0.106574	0.0440237	6.4091	0.00912188	0.00393965	0.00329586	0.00289499	0.00329586	0.928791	1.81009	0.701035	0.928791
ENSMUSG00000040785	Ttc3	0.0155019	0.199102	0.0670996	0.0277221	8.17815	0.00395161	0.000708202	0.00191033	0.00216092	0.00216092	1.04761	1.80962	0.700925	1.04761
ENSMUSG00000041126	H2az2	0.0155419	0.199451	-0.364017	0.150452	7.55069	0.100832	0.00169825	0.0828082	0.00219867	0.0828082	0.776998	1.80849	0.700165	0.776998
ENSMUSG00000029767	Calu	0.0155612	0.199533	0.0659132	0.0272476	7.51764	0.00360103	0.000262755	0.00250899	0.00220663	0.00250899	1.04675	1.80796	0.699986	1.04675
ENSMUSG00000025207	Sema4g	0.0155926	0.199769	0.1475	0.060993	6.47343	0.0323749	0.00229176	0.0115968	0.00282951	0.0115968	1.10765	1.80708	0.699472	1.10765
ENSMUSG00000028551	Cdkn2c	0.0156502	0.200009	0.295715	0.122349	4.05534	0.0708864	0.0210202	0.0348653	0.0143509	0.0348653	1.22749	1.80548	0.698951	1.22749
ENSMUSG00000030861	Acadsb	0.0156376	0.200009	0.12402	0.051306	5.37785	0.0132422	0.00484085	0.00259053	0.0049864	0.0049864	1.08977	1.80583	0.698951	1.08977
ENSMUSG00000027282	Mtch2	0.0156436	0.200009	-0.0770628	0.031882	6.9843	0.00543257	0.0013717	0.000945371	0.00242309	0.00242309	0.947986	1.80566	0.698951	0.947986
ENSMUSG00000026879	Gsn	0.0156785	0.200205	0.362321	0.149948	4.62452	0.192881	0.00581313	0.0781285	0.00883609	0.0781285	1.28549	1.8047	0.698525	1.28549
ENSMUSG00000026229	Psmd1	0.0157114	0.200459	-0.0679176	0.0281168	6.63237	0.00509327	0.000272013	0.00145207	0.00267939	0.00267939	0.954014	1.80379	0.697974	0.954014
ENSMUSG00000025422	Agap2	0.0157381	0.200635	0.249867	0.103467	4.68788	0.126443	0.0115042	0.0284629	0.00838576	0.0284629	1.1891	1.80305	0.697594	1.1891
ENSMUSG00000021666	Gfm2	0.0159036	0.202502	-0.100014	0.0414803	6.75343	0.00904167	0.00259991	0.00382371	0.00257766	0.00382371	0.933024	1.7985	0.693571	0.933024
ENSMUSG00000037313	Tacc3	0.0159108	0.202502	-0.0659669	0.0273613	7.51605	0.00791585	0.000587898	0.00120689	0.00220703	0.00220703	0.955305	1.79831	0.693571	0.955305
ENSMUSG00000024799	Tm7sf2	0.0159437	0.202754	-0.151398	0.0628154	4.91783	0.0194677	0.00775873	0.00331575	0.00697218	0.00697218	0.900378	1.79741	0.693031	0.900378
ENSMUSG00000029875	Ccdc184	0.0159589	0.202781	0.637997	0.264745	2.40716	1.79613	0.202005	-0.108906	0.059664	0.059664	1.55617	1.797	0.692973	1.55617
ENSMUSG00000038845	Phb	0.0159923	0.203038	-0.114847	0.0476725	7.25188	0.0197531	0.00170393	0.0067807	0.00229367	0.0067807	0.92348	1.79609	0.692423	0.92348
ENSMUSG00000024055	Cyp4f13	0.0160124	0.203126	0.373761	0.155176	3.02203	0.104023	0.0536735	-0.0144851	0.0362232	0.0362232	1.29573	1.79554	0.692234	1.29573
ENSMUSG00000005069	Pex5	0.0160784	0.203632	0.0785773	0.0326436	7.28013	0.00679739	0.00169581	0.00222105	0.00228243	0.00228243	1.05598	1.79376	0.691154	1.05598
ENSMUSG00000000552	Zfp385a	0.0160786	0.203632	-0.0918252	0.0381473	6.71125	0.00796863	0.00142236	0.00401043	0.0026113	0.00401043	0.938335	1.79375	0.691154	0.938335
ENSMUSG00000037820	Tgm2	0.016108	0.20367	0.279309	0.116066	3.52527	0.057116	0.0271418	0.0101593	0.0231513	0.0231513	1.21361	1.79296	0.691074	1.21361
ENSMUSG00000026927	Entr1	0.0161071	0.20367	0.0798867	0.0331965	7.09664	0.00888706	0.00175093	0.00231144	0.00236322	0.00236322	1.05694	1.79298	0.691074	1.05694
ENSMUSG00000041889	Shisa4	0.016122	0.20368	-0.175546	0.0729573	5.30611	0.0289489	0.00657082	0.0133008	0.00523761	0.0133008	0.885433	1.79258	0.691052	0.885433
ENSMUSG00000005625	Psmd4	0.0161558	0.20394	-0.066458	0.0276289	7.77843	0.00785575	0.000689555	0.00196654	0.00216031	0.00216031	0.95498	1.79167	0.690498	0.95498
ENSMUSG00000098950	Gm28036	0.01618	0.204079	-0.193942	0.080647	5.69531	0.0290706	0.0130401	0.0112413	0.00407162	0.0112413	0.874213	1.79102	0.690202	0.874213
ENSMUSG00000037993	Dhx38	0.0162276	0.204512	-0.0749308	0.0311724	7.14422	0.0097456	0.000686042	0.0029417	0.0023404	0.0029417	0.949388	1.78975	0.689281	0.949388
ENSMUSG00000041632	Mrps27	0.0162645	0.204811	-0.0886578	0.0368958	5.84794	0.0094398	0.0013441	0.00300828	0.00373808	0.00373808	0.940397	1.78876	0.688647	0.940397
ENSMUSG00000025366	Esyt1	0.0163365	0.204932	0.143096	0.059591	6.32364	0.0235422	0.00297168	0.0102857	0.00298888	0.0102857	1.10427	1.78684	0.68839	1.10427
ENSMUSG00000040102	Klhl42	0.0163404	0.204932	0.169767	0.0707004	3.95197	0.0220886	0.00292976	0.00626478	0.0157315	0.0157315	1.12488	1.78674	0.68839	1.12488
ENSMUSG00000021830	Txndc16	0.0163177	0.204932	0.116898	0.0486724	6.02781	0.0179633	0.00543459	0.00255915	0.00340968	0.00340968	1.0844	1.78734	0.68839	1.0844
ENSMUSG00000024436	Mrps18b	0.0163241	0.204932	-0.109263	0.045496	5.57862	0.00899703	0.00335471	0.00383315	0.00437287	0.00437287	0.927062	1.78717	0.68839	0.927062
ENSMUSG00000006333	Rps9	0.0163132	0.204932	-0.0834848	0.0347588	9.53076	0.0133012	8.04737e-05	0.00443005	0.00287637	0.00443005	0.943775	1.78746	0.68839	0.943775
ENSMUSG00000024097	Srsf7	0.0163581	0.204987	-0.0660646	0.0275174	9.24758	0.00320596	0.00020877	0.00181207	0.00261814	0.00261814	0.95524	1.78627	0.688274	0.95524
ENSMUSG00000020886	Dlg4	0.016413	0.205509	0.122495	0.0510482	6.07693	0.00952766	0.00639988	-8.31389e-05	0.00332889	0.00332889	1.08862	1.78481	0.687169	1.08862
ENSMUSG00000061360	Phf5a	0.0164472	0.205633	-0.0828679	0.034545	6.95567	0.00685634	0.00201539	0.00120801	0.00243981	0.00243981	0.944179	1.78391	0.686907	0.944179
ENSMUSG00000025478	Dpysl4	0.0164496	0.205633	-0.125497	0.052317	6.66246	0.0165924	0.00425518	0.0059632	0.0026526	0.0059632	0.916688	1.78384	0.686907	0.916688
ENSMUSG00000024312	Wdr46	0.016524	0.206396	-0.0905232	0.0377631	6.12757	0.0128878	0.000974388	0.00434954	0.00324886	0.00434954	0.939182	1.78189	0.685299	0.939182
ENSMUSG00000044548	Dact1	0.0165992	0.207168	0.110702	0.0462131	7.38376	0.0324296	0.000624281	0.0073488	0.00224528	0.0073488	1.07975	1.77991	0.683678	1.07975
ENSMUSG00000048096	Lmod1	0.0166151	0.207199	-0.38057	0.158894	3.14854	0.395492	0.061814	-0.00336164	0.0324427	0.0324427	0.768134	1.7795	0.683612	0.768134
ENSMUSG00000000184	Ccnd2	0.016691	0.207978	0.0798701	0.0333704	7.24661	0.00804684	0.000566626	0.00359074	0.00229581	0.00359074	1.05692	1.77752	0.681982	1.05692
ENSMUSG00000001416	Cct3	0.0167546	0.208434	-0.0754404	0.031538	9.01727	0.0110766	0.000824786	0.00288855	0.00245621	0.00288855	0.949052	1.77587	0.681032	0.949052
ENSMUSG00000019990	Pde7b	0.0167534	0.208434	0.253293	0.105888	4.91475	0.106948	0.00733441	0.0345249	0.00698894	0.0345249	1.19192	1.7759	0.681032	1.19192
ENSMUSG00000026112	Coa5	0.0168258	0.209152	-0.0664304	0.0277894	7.18462	0.00689117	0.000560967	0.000745688	0.0023221	0.0023221	0.954998	1.77402	0.679539	0.954998
ENSMUSG00000020775	Mrpl38	0.0169105	0.209698	-0.108705	0.0455091	6.36274	0.0139497	0.00478722	-0.000203768	0.0029448	0.0029448	0.92742	1.77184	0.678405	0.92742
ENSMUSG00000027130	Slc12a6	0.0168963	0.209698	0.0906712	0.0379543	6.4992	0.00480008	0.00257374	0.000594562	0.00280424	0.00280424	1.06487	1.77221	0.678405	1.06487
ENSMUSG00000018821	Avpi1	0.0168974	0.209698	-0.162504	0.0680236	4.5478	0.0217876	0.00785518	0.00621245	0.00941973	0.00941973	0.893473	1.77218	0.678405	0.893473
ENSMUSG00000053080	2700081O15Rik	0.0169421	0.209922	0.0633166	0.0265149	7.51012	0.034258	0.000416159	0.0008258	0.00220853	0.00220853	1.04487	1.77103	0.677943	1.04487
ENSMUSG00000072582	Ptrh2	0.0169568	0.209935	-0.121857	0.0510366	6.7309	0.0144238	0.00109434	0.00862998	0.0025954	0.00862998	0.919004	1.77066	0.677915	0.919004
ENSMUSG00000079164	Tlr5	0.0169733	0.209971	0.443587	0.185812	2.84906	0.178882	0.0865917	0.0423062	0.0419515	0.0423062	1.35998	1.77023	0.67784	1.35998
ENSMUSG00000052031	Tagap1	0.0169935	0.210053	-0.139847	0.0585907	5.33677	0.0187546	0.0048962	0.00791986	0.00512797	0.00791986	0.907615	1.76972	0.677671	0.907615
ENSMUSG00000038949	Cnst	0.017105	0.210218	0.0881819	0.0369822	6.17657	0.00852008	0.00192937	0.00309302	0.00317665	0.00317665	1.06303	1.76688	0.677329	1.06303
ENSMUSG00000039954	Stk32a	0.0170937	0.210218	0.538718	0.225907	3.18454	1.16989	0.0792701	0.111257	0.0314299	0.111257	1.45268	1.76716	0.677329	1.45268
ENSMUSG00000036459	Wtip	0.0171157	0.210218	0.101386	0.0425238	5.50096	0.0116037	0.00215527	0.000213421	0.00459562	0.00459562	1.0728	1.76661	0.677329	1.0728
ENSMUSG00000053198	Prx	0.0170775	0.210218	-0.112508	0.0471724	5.57751	0.031119	0.00379525	0.0045123	0.00437593	0.0045123	0.924979	1.76758	0.677329	0.924979
ENSMUSG00000039976	Tbc1d16	0.017056	0.210218	-0.0651157	0.0272965	7.44543	0.00367188	0.000377155	0.00240454	0.00222619	0.00240454	0.955869	1.76812	0.677329	0.955869
ENSMUSG00000047714	Ppp1r2	0.0171021	0.210218	-0.0785329	0.0329347	7.2408	0.0100291	0.00175134	0.00098288	0.00229818	0.00229818	0.94702	1.76695	0.677329	0.94702
ENSMUSG00000018648	Dusp14	0.0171077	0.210218	0.215604	0.0904231	4.14033	0.0323545	0.0172033	0.00780939	0.0133217	0.0133217	1.16119	1.76681	0.677329	1.16119
ENSMUSG00000043801	Oaz1-ps	0.0171036	0.210218	-0.105255	0.044142	7.49627	0.0139735	0.0017263	0.00554815	0.0022121	0.00554815	0.92964	1.76691	0.677329	0.92964
ENSMUSG00000014164	Klhl3	0.0172109	0.21122	0.169385	0.0711052	4.60139	0.027537	0.00986801	0.003526	0.00900756	0.00900756	1.12458	1.7642	0.675265	1.12458
ENSMUSG00000020717	Pecam1	0.0172252	0.211227	0.0976589	0.041001	6.62018	0.011432	0.00141267	0.00486336	0.00269054	0.00486336	1.07004	1.76384	0.675251	1.07004
ENSMUSG00000015189	Casd1	0.0173049	0.212037	-0.146365	0.0614935	5.40327	0.0254336	0.00197246	0.012145	0.00490167	0.012145	0.903524	1.76183	0.673589	0.903524
ENSMUSG00000053617	Sh3pxd2a	0.0173253	0.212119	0.0662535	0.0278408	7.52919	0.00435613	0.000439575	0.00245417	0.00220377	0.00245417	1.04699	1.76132	0.673421	1.04699
ENSMUSG00000022425	Enpp2	0.0173552	0.212148	-0.141311	0.059397	6.38588	0.20151	0.0020921	0.0110791	0.00291963	0.0110791	0.906695	1.76057	0.67336	0.906695
ENSMUSG00000025451	Paip1	0.0173432	0.212148	0.0650081	0.0273218	7.5775	0.00258219	0.000594199	0.000942011	0.00219266	0.00219266	1.04609	1.76087	0.67336	1.04609
ENSMUSG00000058838	Rps27a-ps2	0.0174114	0.212666	0.238126	0.100141	5.02377	0.0769126	0.0210191	0.0164196	0.00642675	0.0164196	1.17946	1.75917	0.672301	1.17946
ENSMUSG00000013846	St3gal1	0.0174359	0.212797	0.143038	0.060166	6.02651	0.0191849	0.00284011	0.0106744	0.00341186	0.0106744	1.10423	1.75856	0.672034	1.10423
ENSMUSG00000046691	Chtf8	0.0174902	0.212831	-0.0708248	0.0298055	7.94773	0.00406779	0.00116647	0.0019746	0.00215009	0.00215009	0.952093	1.7572	0.671966	0.952093
ENSMUSG00000069307	Hist1h2bq	0.0174937	0.212831	-1.35012	0.568193	2.20548	1.53833	1.10579	0.0994917	0.0693995	0.0994917	0.392259	1.75712	0.671966	0.392259
ENSMUSG00000029221	Slc30a9	0.0174577	0.212831	-0.108765	0.0457587	7.68721	0.00619337	0.00564481	-0.00164512	0.00217225	0.00217225	0.927382	1.75801	0.671966	0.927382
ENSMUSG00000036733	Rbm42	0.017482	0.212831	-0.0686282	0.0288789	7.15642	0.0050571	0.000778797	0.00196102	0.00233478	0.00233478	0.953544	1.75741	0.671966	0.953544
ENSMUSG00000052852	Reep1	0.0175162	0.212937	-0.150429	0.0633201	5.18045	0.0226405	0.0064776	0.00849095	0.00572445	0.00849095	0.900983	1.75656	0.671748	0.900983
ENSMUSG00000019505	Ubb	0.0175608	0.213312	-0.0873495	0.0367826	9.57821	0.00672691	6.63052e-05	0.00498474	0.00292675	0.00498474	0.94125	1.75545	0.670985	0.94125
ENSMUSG00000096370	Gm21992	0.0175953	0.213562	-0.701098	0.29532	5.09572	0.419786	0.283761	0.0418385	0.00609009	0.0418385	0.615104	1.7546	0.670475	0.615104
ENSMUSG00000030002	Dusp11	0.0176167	0.213654	0.122597	0.0516507	5.72467	0.0172535	0.0027289	0.00723086	0.0040026	0.00723086	1.08869	1.75408	0.670288	1.08869
ENSMUSG00000024975	Pdcd4	0.0176697	0.213962	0.107342	0.045245	7.29142	0.016446	0.000642082	0.00700048	0.00227807	0.00700048	1.07724	1.75277	0.669664	1.07724
ENSMUSG00000116340	AC225888.1	0.0176596	0.213962	0.236065	0.0994928	4.05532	0.0395565	0.0226043	0.00172979	0.0143513	0.0143513	1.17778	1.75302	0.669664	1.17778
ENSMUSG00000029601	Iqcd	0.0177718	0.214861	0.594201	0.250682	2.21365	0.307785	0.154876	0.0797318	0.0689833	0.0797318	1.50964	1.75027	0.667842	1.50964
ENSMUSG00000035615	Frmpd1	0.0177612	0.214861	-0.264019	0.111374	4.1427	0.210355	0.0330147	-0.000613825	0.0132944	0.0132944	0.832765	1.75053	0.667842	0.832765
ENSMUSG00000039630	Hnrnpu	0.0178011	0.215047	-0.0603062	0.0254485	8.75199	0.00311041	0.00010155	0.00217083	0.00231626	0.00231626	0.959061	1.74955	0.667467	0.959061
ENSMUSG00000027018	Hat1	0.0178449	0.215106	-0.0710797	0.0300064	7.56685	0.00781421	0.000625408	0.00273602	0.002195	0.00273602	0.951925	1.74848	0.667347	0.951925
ENSMUSG00000040253	Gbp7	0.0178478	0.215106	0.28981	0.122347	3.61633	0.115814	0.0345697	0.0172997	0.0213135	0.0213135	1.22248	1.74842	0.667347	1.22248
ENSMUSG00000057914	Cacnb2	0.0178424	0.215106	-0.249949	0.105514	4.13816	0.113857	0.028217	-0.0050331	0.0133469	0.0133469	0.840926	1.74855	0.667347	0.840926
ENSMUSG00000030059	Tmf1	0.018018	0.21528	0.0805004	0.0340346	6.65388	0.00515182	0.0016644	0.00182806	0.00266013	0.00266013	1.05738	1.74429	0.666997	1.05738
ENSMUSG00000030527	Crtc3	0.0181269	0.21528	0.190095	0.0804461	3.92264	0.0308579	0.00801018	-0.00125134	0.0161503	0.0161503	1.14084	1.74168	0.666997	1.14084
ENSMUSG00000026556	Vangl2	0.0180975	0.21528	0.0804302	0.0340284	6.55095	0.00710429	0.00156818	-0.000102411	0.00275478	0.00275478	1.05733	1.74238	0.666997	1.05733
ENSMUSG00000040586	Ofd1	0.0178784	0.21528	-0.0862023	0.036401	6.25687	0.0163677	0.00187745	0.00268326	0.00306935	0.00306935	0.941999	1.74767	0.666997	0.941999
ENSMUSG00000035606	Ky	0.01799	0.21528	-0.8172	0.345419	1.25764	0.563542	0.312886	-0.0452575	0.132554	0.132554	0.567542	1.74497	0.666997	0.567542
ENSMUSG00000035864	Syt1	0.0181008	0.21528	0.459394	0.194366	3.22437	0.2517	0.044665	0.0963735	0.0303412	0.0963735	1.37496	1.7423	0.666997	1.37496
ENSMUSG00000040945	Rcc2	0.0180724	0.21528	-0.112455	0.0475673	7.3887	0.0105759	0.00016351	0.00828373	0.00224367	0.00828373	0.925012	1.74298	0.666997	0.925012
ENSMUSG00000022197	Pdzd2	0.0180982	0.21528	0.35655	0.15085	2.69312	0.0926622	0.0372819	0.0178202	0.0476731	0.0476731	1.28036	1.74236	0.666997	1.28036
ENSMUSG00000041731	Pgm5	0.0180948	0.21528	0.476723	0.201688	4.13776	0.359882	0.0106277	0.141236	0.0133515	0.141236	1.39158	1.74245	0.666997	1.39158
ENSMUSG00000068122	Agtr2	0.0180784	0.21528	0.609119	0.257664	3.11111	0.527682	0.203746	0.0441124	0.033525	0.0441124	1.52533	1.74284	0.666997	1.52533
ENSMUSG00000024423	Impact	0.0180496	0.21528	-0.135119	0.0571426	5.2361	0.0256476	0.00668927	0.0019867	0.00550109	0.00550109	0.910595	1.74353	0.666997	0.910595
ENSMUSG00000003039	Fam32a	0.0179674	0.21528	-0.0644287	0.0272278	7.55942	0.0052012	0.000571046	0.0021235	0.00219666	0.00219666	0.956324	1.74551	0.666997	0.956324
ENSMUSG00000020986	Sec23a	0.0179765	0.21528	0.0848821	0.0358743	5.74537	0.00668022	0.000849226	0.00271915	0.00395543	0.00395543	1.0606	1.74529	0.666997	1.0606
ENSMUSG00000021054	Sgpp1	0.018068	0.21528	0.112574	0.0476158	5.55373	0.0239839	0.00402204	0.00168534	0.0044424	0.0044424	1.08116	1.74309	0.666997	1.08116
ENSMUSG00000025208	Mrpl43	0.0181263	0.21528	-0.0926592	0.0392121	6.07663	0.0078288	0.00241094	0.00261154	0.00332938	0.00332938	0.937793	1.74169	0.666997	0.937793
ENSMUSG00000091971	Hspa1a	0.0179292	0.21528	1.49811	0.632895	3.75615	2.1324	0.0727507	1.42266	0.0187705	1.42266	2.82473	1.74644	0.666997	2.82473
ENSMUSG00000042429	Adora1	0.0179328	0.21528	0.752815	0.318046	3.10186	0.807063	0.106375	0.271264	0.033797	0.271264	1.68508	1.74635	0.666997	1.68508
ENSMUSG00000055737	Ghr	0.0179493	0.21528	0.192261	0.0812373	4.87618	0.0530971	0.00673158	0.0179066	0.00720404	0.0179066	1.14255	1.74595	0.666997	1.14255
ENSMUSG00000041939	Mvk	0.0180511	0.21528	-0.141221	0.0597238	5.92918	0.0164991	0.00234949	0.010967	0.00358259	0.010967	0.906751	1.7435	0.666997	0.906751
ENSMUSG00000030942	Thumpd1	0.0181658	0.215575	-0.067289	0.0284855	7.09334	0.00443231	0.000664452	0.000675432	0.00236486	0.00236486	0.95443	1.74075	0.666401	0.95443
ENSMUSG00000057182	Scn3a	0.0183277	0.215617	0.469262	0.19893	3.64006	0.446084	0.126881	-0.0112402	0.0208586	0.0208586	1.3844	1.73689	0.666317	1.3844
ENSMUSG00000048489	Depp1	0.0183025	0.215617	0.337927	0.143223	4.10179	0.13421	0.0189914	0.05759	0.013777	0.05759	1.26394	1.73749	0.666317	1.26394
ENSMUSG00000027331	Knstrn	0.0183308	0.215617	-0.0951342	0.0403305	6.69741	0.0143244	0.00169432	0.00437812	0.00262275	0.00437812	0.936185	1.73682	0.666317	0.936185
ENSMUSG00000004032	Gstm5	0.0183367	0.215617	-0.0771917	0.0327257	6.76348	0.00713275	0.00112879	0.0028695	0.00256991	0.0028695	0.947901	1.73668	0.666317	0.947901
ENSMUSG00000025190	Got1	0.0182526	0.215617	-0.0876585	0.0371363	5.96933	0.010873	0.00163835	0.00243145	0.0035103	0.0035103	0.941049	1.73867	0.666317	0.941049
ENSMUSG00000042472	Zfp410	0.0182431	0.215617	-0.0937177	0.0397	6.70256	0.00782307	0.00295637	0.00292771	0.00261846	0.00292771	0.937105	1.7389	0.666317	0.937105
ENSMUSG00000028557	Rnf11	0.018213	0.215617	0.0740485	0.0313598	6.82833	0.0104092	0.00114919	0.00155462	0.0025223	0.0025223	1.05267	1.73962	0.666317	1.05267
ENSMUSG00000063800	Prpf38a	0.0182489	0.215617	-0.0666567	0.028238	7.57516	0.00464847	0.000783741	0.0017758	0.00219317	0.00219317	0.954848	1.73876	0.666317	0.954848
ENSMUSG00000044067	Gpr22	0.0182265	0.215617	0.77914	0.330006	2.23659	1.68285	0.30531	0.101265	0.0678242	0.101265	1.71611	1.7393	0.666317	1.71611
ENSMUSG00000023286	Ube2j2	0.0182771	0.215617	0.143577	0.0608387	7.01356	0.0170203	0.00183059	0.0119878	0.00240664	0.0119878	1.10464	1.73809	0.666317	1.10464
ENSMUSG00000020078	Vps26a	0.0183254	0.215617	-0.0695321	0.0294755	7.14643	0.0058289	0.000904169	0.00100892	0.00233938	0.00233938	0.952947	1.73695	0.666317	0.952947
ENSMUSG00000024743	Syt7	0.018294	0.215617	0.268899	0.113959	4.4522	0.114161	0.0382746	-0.0149086	0.0102089	0.0102089	1.20489	1.73769	0.666317	1.20489
ENSMUSG00000025261	Huwe1	0.0183657	0.215793	-0.152994	0.0648787	6.83172	0.0213023	0.00417826	0.0115362	0.00251992	0.0115362	0.899382	1.73599	0.665962	0.899382
ENSMUSG00000016349	Eef1a2	0.0184268	0.216346	0.803306	0.340827	1.26618	2.35024	0.119861	0.313816	0.131835	0.313816	1.7451	1.73455	0.66485	1.7451
ENSMUSG00000029591	Ung	0.0184421	0.216354	-0.0949803	0.0403036	6.60594	0.0140602	0.00149871	0.00456564	0.00270362	0.00456564	0.936285	1.73419	0.664834	0.936285
ENSMUSG00000025439	Clns1a	0.0184564	0.216354	-0.0737166	0.0312845	7.8155	0.00821205	0.000551095	0.00310279	0.00215676	0.00310279	0.950187	1.73385	0.664834	0.950187
ENSMUSG00000040435	Ppp1r15a	0.0184695	0.216354	0.172477	0.0732054	5.78571	0.0345713	0.0161402	0.000110097	0.00386684	0.00386684	1.12699	1.73355	0.664834	1.12699
ENSMUSG00000021589	Rhobtb3	0.0185223	0.216809	0.0681436	0.0289356	6.50087	0.0132488	0.000323188	0.000395321	0.00280262	0.00280262	1.04837	1.73231	0.663923	1.04837
ENSMUSG00000071866	Ppia	0.0185587	0.216867	-0.0928918	0.0394566	9.85633	0.0130531	0.000299769	0.00551237	0.00326872	0.00551237	0.937641	1.73145	0.663806	0.937641
ENSMUSG00000007872	Id3	0.0185621	0.216867	0.0746873	0.031725	7.33547	0.0854285	0.000336596	0.00342091	0.00226179	0.00342091	1.05313	1.73137	0.663806	1.05313
ENSMUSG00000029622	Arpc1b	0.0185694	0.216867	0.149891	0.0636732	5.33455	0.0236327	0.0100002	0.00229591	0.00513579	0.00513579	1.10949	1.7312	0.663806	1.10949
ENSMUSG00000089936	Gm16199	0.0185891	0.216934	0.224926	0.0955639	4.30692	0.0427663	0.0225452	0.0105222	0.0115493	0.0115493	1.16872	1.73074	0.663673	1.16872
ENSMUSG00000028773	Fabp3	0.0186357	0.217313	-0.344789	0.146548	3.19695	0.188863	0.049091	0.016565	0.0310871	0.0310871	0.787423	1.72965	0.662914	0.787423
ENSMUSG00000039682	Lap3	0.0186684	0.217531	-0.129235	0.0549449	6.08909	0.0207364	0.003635	0.00763572	0.00330936	0.00763572	0.914316	1.72889	0.662479	0.914316
ENSMUSG00000038507	Parp12	0.0187421	0.218225	0.369794	0.157318	2.95982	0.195172	0.0541848	0.0272782	0.0382107	0.0382107	1.29217	1.72718	0.661095	1.29217
ENSMUSG00000032425	Zfp949	0.0188147	0.218741	0.17287	0.0735873	4.67874	0.0321392	0.0103379	0.00987849	0.00844895	0.00987849	1.1273	1.7255	0.66007	1.1273
ENSMUSG00000015120	Ube2i	0.018812	0.218741	-0.059374	0.0252738	8.30013	0.00533498	0.000206423	0.00114461	0.00217829	0.00217829	0.95968	1.72556	0.66007	0.95968
ENSMUSG00000050538	B230217C12Rik	0.018862	0.218764	-0.165334	0.0704074	5.02047	0.0244766	0.00927871	0.00922817	0.00644284	0.00922817	0.891722	1.72441	0.660024	0.891722
ENSMUSG00000050556	Kcnb1	0.0188856	0.218764	0.361563	0.154002	3.46268	0.426904	0.06404	0.0210144	0.0245023	0.0245023	1.28482	1.72387	0.660024	1.28482
ENSMUSG00000038642	Ctss	0.0188875	0.218764	0.292854	0.124738	3.49303	0.0576253	0.0342512	-0.0157467	0.0238382	0.0238382	1.22506	1.72382	0.660024	1.22506
ENSMUSG00000024299	Adamts10	0.0188783	0.218764	0.0884834	0.0376858	7.63191	0.0324611	0.00153919	0.00376296	0.0021817	0.00376296	1.06325	1.72404	0.660024	1.06325
ENSMUSG00000028937	Acot7	0.0188681	0.218764	-0.136222	0.058013	5.84978	0.0248523	0.00277338	0.00979119	0.00373441	0.00979119	0.909899	1.72427	0.660024	0.909899
ENSMUSG00000055239	Kcmf1	0.0189224	0.219003	-0.103498	0.0440968	6.68686	0.0159419	0.00298732	0.00427226	0.00263161	0.00427226	0.930774	1.72302	0.65955	0.930774
ENSMUSG00000008398	Elk3	0.0189679	0.219366	0.0721809	0.0307655	6.82774	0.00937531	0.00101095	0.00112151	0.00252272	0.00252272	1.0513	1.72198	0.658831	1.0513
ENSMUSG00000002129	Sf3a1	0.0189825	0.219371	0.0979095	0.0417369	7.33121	0.0080718	0.00424004	0.00100492	0.00226332	0.00226332	1.07022	1.72165	0.65882	1.07022
ENSMUSG00000018593	Sparc	0.0189971	0.219375	0.193704	0.0825823	7.46617	0.0412694	0.000312868	0.0251478	0.00222026	0.0251478	1.1437	1.72131	0.658813	1.1437
ENSMUSG00000022221	Ripk3	0.0190453	0.219768	0.195493	0.0833786	3.88587	0.064479	0.00926104	0.0107851	0.0166931	0.0166931	1.14512	1.72021	0.658035	1.14512
ENSMUSG00000023078	Cxcl13	0.0191171	0.220432	-0.88623	0.378207	2.79597	5.1537	0.160428	0.373591	0.0438382	0.373591	0.541026	1.71858	0.656726	0.541026
ENSMUSG00000029836	Cbx3	0.0191581	0.220575	-0.0618005	0.0263829	8.86082	0.00366961	0.000230608	0.00138213	0.00236802	0.00236802	0.958068	1.71765	0.656444	0.958068
ENSMUSG00000019143	Hars2	0.0191557	0.220575	0.120129	0.0512828	5.8012	0.0163575	0.00598446	-0.000249126	0.00383394	0.00383394	1.08683	1.7177	0.656444	1.08683
ENSMUSG00000024431	Nr3c1	0.0192118	0.221028	0.282697	0.120738	4.55513	0.191277	0.0119794	0.0424442	0.00936211	0.0424442	1.21647	1.71643	0.655552	1.21647
ENSMUSG00000036158	Prickle1	0.0192657	0.22129	0.149322	0.0638031	7.01003	0.214984	0.00106872	0.014129	0.00240859	0.014129	1.10905	1.71522	0.655039	1.10905
ENSMUSG00000024026	Glo1	0.0192668	0.22129	-0.0696342	0.029754	7.0664	0.00447376	0.000926649	0.000901975	0.00237848	0.00237848	0.95288	1.71519	0.655039	0.95288
ENSMUSG00000022205	Sub1	0.0192774	0.22129	-0.0717528	0.030662	7.77622	0.0180487	0.000549463	0.00296046	0.00216055	0.00296046	0.951481	1.71495	0.655039	0.951481
ENSMUSG00000003352	Cacnb3	0.0192959	0.221337	0.0944865	0.0403829	7.01492	0.0295419	0.00195463	0.00413362	0.00240589	0.00413362	1.06769	1.71454	0.654946	1.06769
ENSMUSG00000071379	Hpcal1	0.0193381	0.221656	-0.104069	0.0444939	5.61862	0.0335553	0.0031262	0.00390087	0.00426471	0.00426471	0.930405	1.71359	0.65432	0.930405
ENSMUSG00000025959	Klf7	0.019383	0.222006	-0.183596	0.0785242	4.52848	0.0213907	0.0134464	0.00207435	0.00957352	0.00957352	0.880506	1.71258	0.653635	0.880506
ENSMUSG00000000568	Hnrnpd	0.0194897	0.222099	-0.0650873	0.0278624	9.32522	0.0052859	0.000216161	0.0010141	0.00268207	0.00268207	0.955887	1.71019	0.653454	0.955887
ENSMUSG00000006403	Adamts4	0.0194537	0.222099	0.146375	0.0626414	5.05691	0.0421269	0.00558659	0.00906278	0.00626856	0.00906278	1.10679	1.711	0.653454	1.10679
ENSMUSG00000075704	Txnrd2	0.0194272	0.222099	-0.20253	0.086654	4.95691	0.0482601	0.0138967	0.0141366	0.00676372	0.0141366	0.869025	1.71159	0.653454	0.869025
ENSMUSG00000031781	Ciapin1	0.0194743	0.222099	-0.0818272	0.0350239	6.40068	0.00568247	0.00167571	0.000402028	0.00290387	0.00290387	0.94486	1.71054	0.653454	0.94486
ENSMUSG00000029500	Pgam5	0.0194845	0.222099	-0.0730457	0.0312678	6.67427	0.00452998	0.00100764	0.000928469	0.00264235	0.00264235	0.950629	1.71031	0.653454	0.950629
ENSMUSG00000034161	Scx	0.0194746	0.222099	0.222085	0.0950575	5.38769	0.152824	0.00823183	0.0255023	0.00495335	0.0255023	1.16642	1.71053	0.653454	1.16642
ENSMUSG00000033016	Nfatc1	0.0194917	0.222099	0.271601	0.116268	5.75133	0.137414	0.0112694	0.0391988	0.00394207	0.0391988	1.20715	1.71015	0.653454	1.20715
ENSMUSG00000047141	Zfp654	0.0195758	0.222384	0.0804406	0.0344591	6.43134	0.00708733	0.00156113	0.00174919	0.00287193	0.00287193	1.05734	1.70828	0.652896	1.05734
ENSMUSG00000032301	Psma4	0.0195717	0.222384	-0.0670059	0.028703	7.43893	0.00651992	0.00047934	0.00259641	0.0022281	0.00259641	0.954617	1.70837	0.652896	0.954617
ENSMUSG00000017697	Ada	0.0195947	0.222384	-0.169467	0.0726072	4.41138	0.0283217	0.00718543	0.012496	0.0105679	0.012496	0.889171	1.70786	0.652896	0.889171
ENSMUSG00000056708	Ier5	0.0196319	0.222384	0.107974	0.0462749	6.75819	0.0124416	0.0013142	0.00668023	0.00257397	0.00668023	1.07771	1.70704	0.652896	1.07771
ENSMUSG00000028907	Utp11	0.0195583	0.222384	-0.0897147	0.0384264	7.31235	0.00727911	0.00115842	0.00435418	0.00227019	0.00435418	0.939709	1.70867	0.652896	0.939709
ENSMUSG00000018102	H2bc4	0.0195472	0.222384	0.293595	0.12574	3.84034	0.114439	0.0248796	0.0341468	0.0173927	0.0341468	1.22569	1.70892	0.652896	1.22569
ENSMUSG00000085666	Tdg-ps2	0.0196307	0.222384	-0.0831383	0.0356307	7.38	0.0133387	0.000671691	0.00406795	0.00224652	0.00406795	0.944002	1.70706	0.652896	0.944002
ENSMUSG00000082507	Gm9378	0.0196116	0.222384	0.770818	0.330299	1.48186	0.425534	0.292622	0.0351836	0.114675	0.114675	1.70624	1.70749	0.652896	1.70624
ENSMUSG00000060636	Rpl35a	0.0196857	0.22283	-0.0742732	0.0318457	8.58836	0.0135399	0.000190641	0.00359551	0.00225243	0.00359551	0.94982	1.70585	0.652026	0.94982
ENSMUSG00000011306	Sugp1	0.0197128	0.222974	-0.0705811	0.0302693	6.91242	0.00435793	0.000954303	0.000744302	0.0024663	0.0024663	0.952254	1.70525	0.651745	0.952254
ENSMUSG00000022893	Adamts1	0.0197289	0.222993	0.195488	0.0838477	6.1927	0.0748661	0.00200431	0.0242427	0.00315406	0.0242427	1.14511	1.7049	0.651708	1.14511
ENSMUSG00000060969	Irx1	0.0199439	0.223462	0.434063	0.186501	3.87279	0.318931	0.0283761	0.101479	0.0168908	0.101479	1.35103	1.70019	0.650797	1.35103
ENSMUSG00000008958	Vps72	0.0198513	0.223462	-0.068813	0.0295443	7.23543	0.00591215	0.000958301	0.00176467	0.0023004	0.0023004	0.953422	1.70221	0.650797	0.953422
ENSMUSG00000025134	Alyref	0.0199284	0.223462	-0.06416	0.0275638	7.54735	0.00764246	0.000637002	0.00177201	0.00219944	0.00219944	0.956502	1.70053	0.650797	0.956502
ENSMUSG00000059142	Zfp945	0.0198394	0.223462	0.0777886	0.0333947	6.67574	0.00956612	0.00152233	0.00134546	0.00264109	0.00264109	1.0554	1.70247	0.650797	1.0554
ENSMUSG00000010936	Vac14	0.0199337	0.223462	-0.0752915	0.0323473	6.68795	0.00973435	0.00127568	0.00207629	0.00263069	0.00263069	0.94915	1.70041	0.650797	0.94915
ENSMUSG00000001750	Tcirg1	0.0199304	0.223462	0.154312	0.0662952	5.70951	0.0383688	0.00885052	0.00755767	0.00403793	0.00755767	1.11289	1.70048	0.650797	1.11289
ENSMUSG00000039768	Dnajc11	0.0198192	0.223462	-0.0931872	0.0399987	6.11836	0.0101171	0.00211318	0.00385978	0.00326308	0.00385978	0.937449	1.70291	0.650797	0.937449
ENSMUSG00000022321	Cdh10	0.0199017	0.223462	0.536069	0.230251	4.64103	0.456736	0.0138725	0.184052	0.00871601	0.184052	1.45002	1.70111	0.650797	1.45002
ENSMUSG00000063236	1110038F14Rik	0.0199147	0.223462	-0.0805903	0.0346185	6.46731	0.00523202	0.00163861	0.000811608	0.00283558	0.00283558	0.945671	1.70083	0.650797	0.945671
ENSMUSG00000023892	Zfp51	0.0198065	0.223462	0.121903	0.052319	5.32007	0.0101893	0.0050319	0.00303585	0.00518725	0.00518725	1.08817	1.70319	0.650797	1.08817
ENSMUSG00000083380	Ndufb4c	0.0198272	0.223462	-0.141112	0.0605734	5.72523	0.0204119	0.00400163	0.0096965	0.00400132	0.0096965	0.90682	1.70274	0.650797	0.90682
ENSMUSG00000027189	Trim44	0.0199241	0.223462	0.110141	0.0473162	5.35044	0.014243	0.00327805	0.00473265	0.00508022	0.00508022	1.07933	1.70062	0.650797	1.07933
ENSMUSG00000032459	Mrps22	0.0199853	0.223763	-0.0915581	0.0393523	7.23431	0.00853922	0.00165033	0.00413114	0.00230086	0.00413114	0.938509	1.69929	0.650212	0.938509
ENSMUSG00000073633	Fbxo36	0.0200044	0.223815	-0.25673	0.110361	3.7415	0.0449663	0.0264487	0.00901275	0.0190218	0.0190218	0.836983	1.69887	0.650111	0.836983
ENSMUSG00000058325	Dock1	0.0201887	0.225713	0.0663163	0.0285499	7.33383	0.00652069	0.000780643	0.000884408	0.00226238	0.00226238	1.04704	1.69489	0.646444	1.04704
ENSMUSG00000029247	Paics	0.0202055	0.225738	-0.0608089	0.0261824	7.98366	0.0111809	0.000283989	0.00227528	0.0021499	0.00227528	0.958726	1.69453	0.646395	0.958726
ENSMUSG00000027646	Src	0.0202202	0.225739	0.0725877	0.0312577	7.4773	0.00462332	0.00143044	0.00129104	0.00221719	0.00221719	1.0516	1.69421	0.646393	1.0516
ENSMUSG00000079480	Pin4	0.0203407	0.225779	-0.112408	0.0484515	6.11601	0.0175765	0.00549743	0.000807312	0.00326675	0.00326675	0.925043	1.69163	0.646317	0.925043
ENSMUSG00000028797	Tmem234	0.0203373	0.225779	-0.0764688	0.0329598	6.60719	0.00651455	0.00135322	0.00212724	0.00270247	0.00270247	0.948376	1.69171	0.646317	0.948376
ENSMUSG00000047686	Rtl3	0.020291	0.225779	0.833513	0.35913	4.43981	4.59125	0.0547501	0.426753	0.0103165	0.426753	1.78202	1.6927	0.646317	1.78202
ENSMUSG00000026974	Zmynd19	0.0202848	0.225779	-0.0771827	0.0332535	7.49419	0.0141501	0.00174941	0.0023789	0.00221265	0.0023789	0.947907	1.69283	0.646317	0.947907
ENSMUSG00000046138	9930021J03Rik	0.0202525	0.225779	0.0823288	0.0354615	7.17501	0.00542652	0.00236838	0.00154897	0.00232637	0.00232637	1.05873	1.69352	0.646317	1.05873
ENSMUSG00000029131	Dnajb6	0.020315	0.225779	-0.0657663	0.0283417	6.88496	0.00563648	0.000514902	0.00122679	0.00248391	0.00248391	0.955438	1.69218	0.646317	0.955438
ENSMUSG00000056394	Lig1	0.0202598	0.225779	-0.0661497	0.0284944	8.52503	0.00676662	0.000799159	0.00110381	0.00223205	0.00223205	0.955184	1.69336	0.646317	0.955184
ENSMUSG00000014769	Psmb1	0.0203018	0.225779	-0.0776259	0.033449	7.83199	0.0096201	0.000412884	0.00376411	0.00215541	0.00376411	0.947616	1.69246	0.646317	0.947616
ENSMUSG00000005470	Asf1b	0.020391	0.226145	-0.1754	0.0756336	5.76741	0.0356967	0.0154432	0.00591309	0.00390649	0.00591309	0.885522	1.69056	0.645612	0.885522
ENSMUSG00000031239	Itm2a	0.0204242	0.226145	0.273652	0.118032	7.62527	0.331688	0.000552142	0.0514587	0.00218295	0.0514587	1.20886	1.68986	0.645612	1.20886
ENSMUSG00000021136	Smoc1	0.0204323	0.226145	-0.198724	0.0857192	7.08627	0.113354	0.000959283	0.0264724	0.00236839	0.0264724	0.871321	1.68968	0.645612	0.871321
ENSMUSG00000052798	Nup107	0.0204291	0.226145	-0.10165	0.0438455	6.41207	0.00845371	0.00428517	-0.00167547	0.00289188	0.00289188	0.931966	1.68975	0.645612	0.931966
ENSMUSG00000029036	Atad3a	0.0205057	0.22631	-0.0812448	0.0350652	6.30059	0.00734453	0.00157452	0.000422195	0.00301588	0.00301588	0.945242	1.68812	0.645296	0.945242
ENSMUSG00000028964	Park7	0.0204666	0.22631	-0.0639922	0.0276104	7.33664	0.00975014	0.00050246	0.00234359	0.00226138	0.00234359	0.956613	1.68895	0.645296	0.956613
ENSMUSG00000035455	Fignl1	0.0204999	0.22631	-0.0782915	0.033789	7.17541	0.00799579	0.00091296	0.00334938	0.00232619	0.00334938	0.947179	1.68825	0.645296	0.947179
ENSMUSG00000037242	Clic4	0.0205026	0.22631	-0.0591517	0.0255292	8.58914	0.004687	0.000180468	0.000510592	0.00225269	0.00225269	0.959828	1.68819	0.645296	0.959828
ENSMUSG00000034928	Rnf44	0.0205556	0.226699	-0.0807687	0.0348735	6.35205	0.00422445	0.00158368	0.00139081	0.00295665	0.00295665	0.945554	1.68707	0.644551	0.945554
ENSMUSG00000037606	Osbpl5	0.0206195	0.226734	0.205481	0.0887655	4.24733	0.0602331	0.014847	0.0145691	0.0121514	0.0145691	1.15307	1.68572	0.644483	1.15307
ENSMUSG00000059326	Csf2ra	0.0206258	0.226734	0.233525	0.100885	4.61658	0.072828	0.0232374	0.0147596	0.00889452	0.0147596	1.1757	1.68559	0.644483	1.1757
ENSMUSG00000000563	Atp5pb	0.0206322	0.226734	-0.0604347	0.0261097	7.5852	0.00527883	0.000354061	0.00179178	0.00219101	0.00219101	0.958975	1.68545	0.644483	0.958975
ENSMUSG00000071478	H2ac7	0.020618	0.226734	-0.350566	0.151438	6.67489	0.105981	0.00819011	0.0774285	0.00264182	0.0774285	0.784277	1.68575	0.644483	0.784277
ENSMUSG00000039914	Coq10a	0.0206037	0.226734	0.199137	0.086014	4.26254	0.0344574	0.015626	0.00892368	0.0119948	0.0119948	1.14801	1.68605	0.644483	1.14801
ENSMUSG00000052005	Gm9864	0.020704	0.226878	-0.148196	0.0640614	6.52335	0.0531503	0.00160615	0.0137149	0.00278096	0.0137149	0.902378	1.68395	0.644208	0.902378
ENSMUSG00000027957	Slc35a3	0.0206946	0.226878	0.172573	0.0745936	4.12515	0.0281683	0.00727423	0.00425466	0.0134988	0.0134988	1.12707	1.68414	0.644208	1.12707
ENSMUSG00000071669	Snx29	0.0206833	0.226878	0.137333	0.059356	4.94075	0.0170887	0.00513665	0.00801641	0.00684887	0.00801641	1.09987	1.68438	0.644208	1.09987
ENSMUSG00000026463	Atp2b4	0.0206885	0.226878	0.161791	0.0699297	6.52512	0.0517755	0.00544304	0.0128136	0.00277927	0.0128136	1.11867	1.68427	0.644208	1.11867
ENSMUSG00000018040	Rrp7a	0.0208068	0.227493	-0.131077	0.056707	5.73049	0.0205313	0.008016	0.00299362	0.00398921	0.00398921	0.91315	1.68179	0.643031	0.91315
ENSMUSG00000025880	Smad7	0.0207758	0.227493	0.142426	0.061602	5.02565	0.0574062	0.00578547	0.00838181	0.00641765	0.00838181	1.10376	1.68244	0.643031	1.10376
ENSMUSG00000090258	Churc1	0.0208011	0.227493	-0.128185	0.0554537	5.19479	0.0156962	0.00581476	0.00554378	0.00566566	0.00566566	0.914982	1.68191	0.643031	0.914982
ENSMUSG00000020593	Lpin1	0.0208191	0.227493	-0.149847	0.0648338	4.82459	0.0352541	0.0081872	0.00477528	0.00750555	0.00750555	0.901346	1.68154	0.643031	0.901346
ENSMUSG00000024535	Snx24	0.0208491	0.227661	0.144662	0.0626052	4.51924	0.0684336	0.00498432	0.00451471	0.00964816	0.00964816	1.10547	1.68091	0.642712	1.10547
ENSMUSG00000047123	Ticam1	0.0208895	0.227941	0.141067	0.0610685	4.96154	0.0163874	0.00718338	0.00199875	0.00673958	0.00673958	1.10272	1.68007	0.642178	1.10272
ENSMUSG00000000823	Zfp512b	0.0209321	0.228244	0.0906906	0.0392735	6.06149	0.0180624	0.00240437	0.00229537	0.00335395	0.00335395	1.06488	1.67919	0.641601	1.06488
ENSMUSG00000039850	Endov	0.0210479	0.229184	-0.14115	0.06118	5.32733	0.0171429	0.00881248	0.00273439	0.00516138	0.00516138	0.906796	1.67679	0.639816	0.906796
ENSMUSG00000042207	Kdm5b	0.0210479	0.229184	0.0666853	0.0289041	8.08454	0.00378657	0.0007144	0.00240459	0.00215308	0.00240459	1.04731	1.67679	0.639816	1.04731
ENSMUSG00000066551	Hmgb1	0.0210633	0.22919	-0.0588287	0.0255018	8.80413	0.00340189	8.78326e-05	0.00202873	0.0023401	0.0023401	0.960043	1.67647	0.639805	0.960043
ENSMUSG00000027823	Gmps	0.0211013	0.229441	-0.0589567	0.0255648	8.42276	0.00346101	0.000235901	0.00142569	0.00220405	0.00220405	0.959958	1.67569	0.639329	0.959958
ENSMUSG00000018569	Cldn7	0.0211564	0.229461	-0.221667	0.0961604	4.98802	0.172372	0.0198553	0.0146662	0.0066039	0.0146662	0.857574	1.67456	0.639291	0.857574
ENSMUSG00000020826	Nos2	0.021146	0.229461	-0.327505	0.142062	3.32855	0.0679373	0.0476954	-0.0103865	0.0276493	0.0276493	0.796914	1.67477	0.639291	0.796914
ENSMUSG00000060397	Zfp128	0.0211296	0.229461	0.134198	0.0582037	5.33372	0.0155564	0.00750853	0.00423839	0.00513875	0.00513875	1.09748	1.67511	0.639291	1.09748
ENSMUSG00000066026	Dhrs3	0.0211625	0.229461	0.182152	0.0790222	5.37755	0.0991744	0.00673683	0.016576	0.00498739	0.016576	1.13457	1.67443	0.639291	1.13457
ENSMUSG00000049800	Sertad2	0.0212218	0.229942	0.109971	0.0477302	6.51492	0.0171058	0.00372092	0.00478425	0.00278905	0.00478425	1.07921	1.67322	0.638381	1.07921
ENSMUSG00000093798	Gm8355	0.0212753	0.230361	0.268244	0.116473	4.2536	0.0630555	0.0206006	0.0300453	0.0120866	0.0300453	1.20434	1.67212	0.637592	1.20434
ENSMUSG00000022449	Adamts20	0.0213802	0.231335	0.226138	0.0982696	5.7113	0.220015	0.00485005	0.0312024	0.00403373	0.0312024	1.1697	1.66999	0.63576	1.1697
ENSMUSG00000007950	Abhd8	0.0214389	0.231807	-0.073594	0.0319951	6.81436	0.00371075	0.00128955	0.00146237	0.00253222	0.00253222	0.950268	1.6688	0.634874	0.950268
ENSMUSG00000074766	Ism1	0.0214738	0.231958	0.290759	0.126442	4.12621	0.0819655	0.0187976	0.0408893	0.0134864	0.0408893	1.22328	1.66809	0.63459	1.22328
ENSMUSG00000004267	Eno2	0.0214829	0.231958	0.43408	0.18878	2.6658	0.269649	0.0843161	0.0482963	0.0487326	0.0487326	1.35105	1.66791	0.63459	1.35105
ENSMUSG00000033436	Armcx2	0.0215103	0.232092	-0.0619224	0.0269356	8.15403	0.00360737	0.000550181	0.00176078	0.00215845	0.00215845	0.957987	1.66735	0.634339	0.957987
ENSMUSG00000026473	Glul	0.0215305	0.232148	0.0741922	0.0322778	6.38386	0.00274753	0.000967799	0.00069952	0.0029218	0.0029218	1.05277	1.66695	0.634236	1.05277
ENSMUSG00000002068	Ccne1	0.021547	0.232164	-0.107833	0.0469193	5.78902	0.0252727	0.00196126	0.00625739	0.00385977	0.00625739	0.927981	1.66661	0.634205	0.927981
ENSMUSG00000038366	Lasp1	0.0215776	0.232213	0.0887638	0.0386312	5.60236	0.00618082	0.00126337	0.00272412	0.00430815	0.00430815	1.06346	1.666	0.634113	1.06346
ENSMUSG00000004096	Cwc15	0.0215859	0.232213	-0.0688109	0.0299493	6.86089	0.00634565	0.000848782	0.00200089	0.00249988	0.00249988	0.953423	1.66583	0.634113	0.953423
ENSMUSG00000040212	Emp3	0.0215967	0.232213	0.323667	0.140885	3.35771	0.185404	0.0398457	0.0342555	0.0269351	0.0342555	1.25151	1.66561	0.634113	1.25151
ENSMUSG00000068874	Selenbp1	0.0216808	0.232268	0.196444	0.0855623	4.27199	0.0279292	0.0154329	-0.00028382	0.0118985	0.0118985	1.14587	1.66392	0.634011	1.14587
ENSMUSG00000041852	Tcf20	0.021692	0.232268	0.104002	0.0453026	5.2928	0.0105723	0.00237574	0.00521036	0.00528626	0.00528626	1.07475	1.6637	0.634011	1.07475
ENSMUSG00000022092	Ppp3cc	0.0216602	0.232268	0.203075	0.0884365	4.31949	0.0449813	0.012476	0.0167225	0.0114263	0.0167225	1.15115	1.66434	0.634011	1.15115
ENSMUSG00000012405	Rpl15	0.0216865	0.232268	-0.0759967	0.0331023	8.67018	0.0125729	0.000604567	0.00348628	0.0022823	0.00348628	0.948686	1.66381	0.634011	0.948686
ENSMUSG00000045532	C1ql1	0.0216314	0.232268	0.416257	0.181235	3.02699	0.214953	0.0628185	0.0598075	0.0360684	0.0598075	1.33446	1.66492	0.634011	1.33446
ENSMUSG00000041324	Inhba	0.0216667	0.232268	0.627504	0.273284	4.83741	0.781646	0.0322148	0.246606	0.00742912	0.246606	1.54489	1.66421	0.634011	1.54489
ENSMUSG00000035274	Tpbg	0.0217265	0.232476	0.130233	0.0567436	6.72944	0.0192756	0.00942416	0.000760429	0.00259656	0.00259656	1.09447	1.66301	0.633622	1.09447
ENSMUSG00000095432	Zfp748	0.0217768	0.232853	0.100315	0.0437249	5.58084	0.00892997	0.00277088	0.00332828	0.00436674	0.00436674	1.07201	1.66201	0.632918	1.07201
ENSMUSG00000039158	Akna	0.0218037	0.232979	0.0802649	0.0349926	6.0802	0.00578659	0.00124776	0.000887211	0.00332363	0.00332363	1.05721	1.66147	0.632682	1.05721
ENSMUSG00000048616	Nog	0.0218205	0.232998	0.363473	0.158481	4.06862	0.475293	0.0199705	0.0737971	0.014184	0.0737971	1.28652	1.66114	0.632647	1.28652
ENSMUSG00000042079	Hnrnpf	0.0218614	0.233113	-0.0641039	0.0279592	9.30837	0.00471268	0.000250638	0.0011064	0.00266777	0.00266777	0.956539	1.66032	0.632433	0.956539
ENSMUSG00000005846	Rsl1d1	0.0218593	0.233113	-0.0709133	0.0309286	7.04641	0.00651772	0.000483858	0.00308737	0.0023889	0.00308737	0.952035	1.66036	0.632433	0.952035
ENSMUSG00000026955	Sapcd2	0.0219023	0.233259	-0.116994	0.0510432	5.61791	0.0264432	0.00546026	0.000640059	0.0042666	0.0042666	0.922107	1.65951	0.632162	0.922107
ENSMUSG00000025064	Col17a1	0.0219053	0.233259	0.465043	0.202898	3.08538	0.293234	0.01448	0.139212	0.0342864	0.139212	1.38036	1.65945	0.632162	1.38036
ENSMUSG00000037434	Slc30a1	0.0219513	0.233588	0.10501	0.0458316	5.31719	0.0166623	0.00264439	0.00202624	0.0051976	0.0051976	1.0755	1.65854	0.631549	1.0755
ENSMUSG00000024269	Tpgs2	0.0219675	0.2336	-0.0810464	0.0353771	6.55716	0.00992886	0.00132551	0.00334691	0.00274894	0.00334691	0.945372	1.65822	0.631527	0.945372
ENSMUSG00000020459	Mtif2	0.0220162	0.233956	-0.103994	0.0454103	5.83215	0.00787607	0.00392861	0.00171477	0.0037699	0.0037699	0.930454	1.65726	0.630865	0.930454
ENSMUSG00000023048	Prr13	0.0220738	0.234085	-0.103388	0.0451655	5.70741	0.00841643	0.00357282	0.00328273	0.00404289	0.00404289	0.930844	1.65612	0.630626	0.930844
ENSMUSG00000019471	Cdc37	0.0220471	0.234085	-0.0604325	0.0263948	8.08742	0.00990789	0.000447719	0.00136245	0.00215325	0.00215325	0.958977	1.65665	0.630626	0.958977
ENSMUSG00000008450	Nutf2	0.0220637	0.234085	-0.181227	0.0791638	5.22988	0.0264359	0.017871	-0.000711057	0.00552542	0.00552542	0.881952	1.65632	0.630626	0.881952
ENSMUSG00000034160	Ogt	0.0221396	0.234622	0.0585996	0.0256121	8.46909	0.0123556	0.000233006	0.000993295	0.00221599	0.00221599	1.04145	1.65483	0.629632	1.04145
ENSMUSG00000020900	Myh10	0.0221996	0.234823	-0.0645626	0.0282311	7.76439	0.00348861	0.000248846	0.00272659	0.00216186	0.00272659	0.956235	1.65365	0.629259	0.956235
ENSMUSG00000084323	Gm14438	0.0221879	0.234823	0.200407	0.0876237	4.44631	0.0510789	0.0159462	0.012718	0.0102599	0.012718	1.14902	1.65388	0.629259	1.14902
ENSMUSG00000022816	Fstl1	0.0222194	0.234823	0.144269	0.0630935	6.75693	0.0281938	0.000261143	0.0146005	0.00257495	0.0146005	1.10517	1.65327	0.629259	1.10517
ENSMUSG00000025579	Gaa	0.0222084	0.234823	0.112972	0.0494021	5.12733	0.0104474	0.00316155	0.00413178	0.00594992	0.00594992	1.08145	1.65348	0.629259	1.08145
ENSMUSG00000048668	Rhno1	0.0222391	0.234871	-0.0718716	0.0314363	6.94822	0.00513345	0.00116001	0.00252943	0.00244427	0.00252943	0.951403	1.65288	0.629171	0.951403
ENSMUSG00000016757	Ttll12	0.0222786	0.235127	-0.0633939	0.0277364	7.43741	0.00422339	0.000643541	0.00176673	0.00222854	0.00222854	0.95701	1.65211	0.628697	0.95701
ENSMUSG00000032363	Adamts7	0.0223364	0.235416	0.128629	0.0563029	6.96109	0.0878372	0.00546367	0.00637105	0.0024366	0.00637105	1.09325	1.65099	0.628164	1.09325
ENSMUSG00000034801	Sos2	0.022324	0.235416	0.0980502	0.0429139	6.18517	0.00835983	0.00333753	0.0035378	0.00316453	0.0035378	1.07033	1.65123	0.628164	1.07033
ENSMUSG00000020308	Tpgs1	0.022378	0.235689	-0.170718	0.0747489	4.041	0.0223503	0.00632569	0.0107379	0.0145339	0.0145339	0.8884	1.65018	0.62766	0.8884
ENSMUSG00000029563	Foxp2	0.0224081	0.235689	0.18014	0.0788921	6.08964	0.027446	0.00103582	0.0222003	0.00330849	0.0222003	1.13299	1.64959	0.62766	1.13299
ENSMUSG00000039419	Cntnap2	0.0223971	0.235689	-0.393174	0.172176	3.51768	0.303926	0.0340004	0.0766721	0.0233113	0.0766721	0.761452	1.64981	0.62766	0.761452
ENSMUSG00000081176	H3f3a-ps2	0.0224451	0.235917	1.03886	0.455092	1.5947	0.733603	0.666781	-0.154373	0.106425	0.106425	2.0546	1.64888	0.62724	2.0546
ENSMUSG00000026826	Nr4a2	0.0224632	0.235947	0.157541	0.0690232	4.91917	0.0289788	0.0108215	-0.00340327	0.00696487	0.00696487	1.11538	1.64853	0.627185	1.11538
ENSMUSG00000062300	Nectin2	0.022619	0.237261	-0.069437	0.0304574	7.03072	0.0297929	0.00106595	0.00216357	0.00239728	0.00239728	0.95301	1.64553	0.624774	0.95301
ENSMUSG00000020427	Igfbp3	0.0226179	0.237261	0.168245	0.0737973	6.99854	0.0282307	0.000790836	0.019541	0.002415	0.019541	1.12369	1.64555	0.624774	1.12369
ENSMUSG00000035799	Twist1	0.0226667	0.23743	0.15	0.065818	8.75325	0.0201146	0.000143982	0.0160289	0.00231682	0.0160289	1.10957	1.64461	0.624464	1.10957
ENSMUSG00000025144	Cenpx	0.0226812	0.23743	-0.100942	0.0442969	5.86246	0.0107226	0.0036163	0.00351079	0.00370929	0.00370929	0.932424	1.64433	0.624464	0.932424
ENSMUSG00000028949	Smarcd3	0.0226657	0.23743	0.112437	0.0493357	5.49399	0.0449707	0.00353844	0.00554853	0.00461647	0.00554853	1.08105	1.64463	0.624464	1.08105
ENSMUSG00000029499	Pxmp2	0.0227138	0.237611	-0.270965	0.118938	3.21517	0.0730397	0.0222225	0.0235293	0.0305898	0.0305898	0.828765	1.64371	0.624133	0.828765
ENSMUSG00000035504	Reep6	0.0227401	0.237662	-0.180991	0.0794597	4.52551	0.0430439	0.0127236	0.0108481	0.00959748	0.0108481	0.882097	1.64321	0.624041	0.882097
ENSMUSG00000038722	Bud31	0.0227494	0.237662	-0.0721605	0.0316825	6.86572	0.00647851	0.00103071	0.00271672	0.00249663	0.00271672	0.951212	1.64303	0.624041	0.951212
ENSMUSG00000064254	Ethe1	0.0227664	0.237678	-0.155354	0.0682176	5.13148	0.0224181	0.00577253	0.011601	0.00593187	0.011601	0.897912	1.64271	0.624011	0.897912
ENSMUSG00000007837	Prrg2	0.0229448	0.239379	0.174219	0.0766016	4.93504	0.0332362	0.0150272	-0.0035588	0.00687929	0.00687929	1.12835	1.63931	0.620913	1.12835
ENSMUSG00000020134	Peli1	0.0229843	0.239629	0.0616641	0.0271206	7.60431	0.00484897	0.000558919	0.00127089	0.00218705	0.00218705	1.04367	1.63857	0.620461	1.04367
ENSMUSG00000003226	Ranbp2	0.023033	0.239652	-0.0961438	0.0423003	7.0979	0.00781974	0.000220688	0.00645942	0.0023626	0.00645942	0.93553	1.63765	0.620419	0.93553
ENSMUSG00000033565	Rbfox2	0.0230038	0.239652	0.0644747	0.0283608	7.00099	0.00298288	0.000589234	0.00144743	0.00241363	0.00241363	1.0457	1.6382	0.620419	1.0457
ENSMUSG00000061474	Mrps36	0.0230265	0.239652	-0.169436	0.0745431	5.1093	0.0237681	0.00496144	0.0157835	0.0060293	0.0157835	0.88919	1.63777	0.620419	0.88919
ENSMUSG00000034042	Gpbp1l1	0.0230922	0.239745	0.110861	0.0487966	6.82582	0.0106361	0.0063654	0.000773475	0.00252407	0.00252407	1.07987	1.63654	0.62025	1.07987
ENSMUSG00000055675	Kbtbd11	0.023104	0.239745	0.168858	0.0743308	4.22516	0.0245174	0.00824333	0.00435063	0.0123836	0.0123836	1.12417	1.63631	0.62025	1.12417
ENSMUSG00000018395	Kif3a	0.0230632	0.239745	0.0803741	0.0353699	6.39924	0.00553789	0.00176513	0.000135862	0.00290538	0.00290538	1.05729	1.63708	0.62025	1.05729
ENSMUSG00000078784	Rbis	0.0230758	0.239745	-0.0919963	0.0404882	6.45832	0.00817124	0.00199334	0.00412669	0.00284456	0.00412669	0.938224	1.63684	0.62025	0.938224
ENSMUSG00000021474	Sfxn1	0.0231216	0.239748	-0.0622529	0.027407	7.72531	0.00526271	0.000637564	0.000602648	0.00216671	0.00216671	0.957767	1.63598	0.620245	0.957767
ENSMUSG00000075304	Sp5	0.0231353	0.239748	0.433878	0.191035	4.15495	0.585287	0.022016	0.11423	0.0131539	0.11423	1.35086	1.63572	0.620245	1.35086
ENSMUSG00000020020	Usp44	0.023168	0.239925	-0.272199	0.119877	3.76072	0.101057	0.0264703	0.0271794	0.0186928	0.0271794	0.828057	1.63511	0.619924	0.828057
ENSMUSG00000020859	Spag9	0.023197	0.240065	0.0826873	0.0364233	7.38353	0.00613505	0.0010429	0.00390996	0.00224536	0.00390996	1.05899	1.63457	0.619671	1.05899
ENSMUSG00000069793	Slfn9	0.0232171	0.240112	0.12626	0.0556249	5.52971	0.0402791	0.00462771	0.00692372	0.00451113	0.00692372	1.09146	1.63419	0.619587	1.09146
ENSMUSG00000031103	Elf4	0.0232725	0.240203	0.18829	0.0829864	5.57104	0.135989	0.00865343	0.0170571	0.00439385	0.0170571	1.13941	1.63316	0.619422	1.13941
ENSMUSG00000026712	Mrc1	0.0232686	0.240203	0.286574	0.1263	4.41606	0.07797	0.00829189	0.0512612	0.0105261	0.0512612	1.21974	1.63323	0.619422	1.21974
ENSMUSG00000020744	Slc25a19	0.0232606	0.240203	0.185519	0.0817578	4.63048	0.0253355	0.0161624	-0.00180208	0.00879248	0.00879248	1.13723	1.63338	0.619422	1.13723
ENSMUSG00000032431	Crtap	0.0233084	0.24031	0.132869	0.0585753	5.77866	0.0261298	0.00234452	0.0104648	0.00388202	0.0104648	1.09647	1.63249	0.619228	1.09647
ENSMUSG00000074643	Cpne1	0.0233296	0.24031	0.0846867	0.0373399	6.12982	0.00865257	0.00195984	0.00310741	0.00324543	0.00324543	1.06046	1.63209	0.619228	1.06046
ENSMUSG00000032966	Fkbp1a	0.023324	0.24031	-0.0625946	0.027598	7.24111	0.00479362	0.000545431	0.000814295	0.00229806	0.00229806	0.95754	1.6322	0.619228	0.95754
ENSMUSG00000016833	Mrps18c	0.0233537	0.240354	-0.0993678	0.0438207	5.54178	0.0106208	0.00269256	0.0026051	0.00447639	0.00447639	0.933442	1.63164	0.619149	0.933442
ENSMUSG00000037573	Tob1	0.0233649	0.240354	0.101333	0.044691	6.19038	0.00864078	0.00210816	0.00534839	0.00315727	0.00534839	1.07276	1.63144	0.619149	1.07276
ENSMUSG00000104418	Gm37070	0.0234056	0.240612	0.745878	0.329052	1.84517	0.2795	0.314467	-0.182882	0.0897598	0.0897598	1.67699	1.63068	0.618682	1.67699
ENSMUSG00000042198	Chchd7	0.0234874	0.241166	-0.10492	0.0463137	5.95205	0.0153384	0.00333351	0.00467433	0.00354107	0.00467433	0.929857	1.62917	0.617684	0.929857
ENSMUSG00000019179	Mdh2	0.0234907	0.241166	-0.0594419	0.0262395	7.37044	0.00685474	0.000320751	0.00195205	0.0022497	0.0022497	0.959635	1.6291	0.617684	0.959635
ENSMUSG00000029862	Clcn1	0.023528	0.241229	-0.344886	0.152285	4.04802	0.092278	0.0721342	-0.027419	0.014444	0.014444	0.78737	1.62841	0.617571	0.78737
ENSMUSG00000056313	Tcim	0.023521	0.241229	0.0864166	0.0381553	6.09344	0.038977	0.00213266	0.00210331	0.00330242	0.00330242	1.06173	1.62854	0.617571	1.06173
ENSMUSG00000026914	Psmd14	0.023569	0.241488	-0.0746616	0.0329765	6.14642	0.0088151	0.000839392	0.00316673	0.00322042	0.00322042	0.949565	1.62766	0.617104	0.949565
ENSMUSG00000039831	Arhgap29	0.0236551	0.241651	0.0884566	0.0390936	6.59947	0.00771269	0.00137631	0.00432939	0.00270959	0.00432939	1.06323	1.62608	0.616812	1.06323
ENSMUSG00000036275	9530068E07Rik	0.0236981	0.241651	0.0583167	0.0257812	7.75828	0.00322622	0.000318867	0.0015854	0.00216256	0.00216256	1.04125	1.62529	0.616812	1.04125
ENSMUSG00000043445	Pgp	0.0236863	0.241651	-0.0946265	0.0418298	6.55182	0.00939967	0.00135589	0.00517645	0.00275396	0.00517645	0.936515	1.6255	0.616812	0.936515
ENSMUSG00000106918	Mrpl33	0.0236747	0.241651	-0.117259	0.0518304	6.49891	0.0169149	0.0036313	0.00639791	0.00280452	0.00639791	0.921937	1.62572	0.616812	0.921937
ENSMUSG00000068014	Gm14648	0.0237099	0.241651	0.368682	0.163004	5.04562	0.118206	0.0428414	0.0563546	0.00632182	0.0563546	1.29117	1.62507	0.616812	1.29117
ENSMUSG00000020108	Ddit4	0.023698	0.241651	0.228208	0.100888	7.40005	0.0639329	0.000650973	0.0373484	0.00224002	0.0373484	1.17138	1.62529	0.616812	1.17138
ENSMUSG00000031818	Cox4i1	0.0236251	0.241651	-0.0745665	0.0329478	7.80195	0.0113022	0.000308151	0.0037446	0.00215797	0.0037446	0.949627	1.62663	0.616812	0.949627
ENSMUSG00000030657	Xylt1	0.0236544	0.241651	0.164552	0.0727238	4.03903	0.0160293	0.00518554	0.00362175	0.0145591	0.0145591	1.12082	1.62609	0.616812	1.12082
ENSMUSG00000078485	Plekhn1	0.0237338	0.241734	0.0708844	0.0313452	6.8292	0.00651851	0.00114639	0.00216095	0.00252169	0.00252169	1.05036	1.62463	0.616662	1.05036
ENSMUSG00000049184	Purg	0.0237798	0.242043	0.0988156	0.0437108	5.73009	0.0171937	0.00314288	0.00331215	0.00399015	0.00399015	1.07089	1.62379	0.616107	1.07089
ENSMUSG00000030319	Cand2	0.0238523	0.242621	-0.0577203	0.0255456	8.24023	0.00321363	0.000267546	0.000428069	0.00216875	0.00216875	0.960781	1.62247	0.615072	0.960781
ENSMUSG00000003438	Timm50	0.023893	0.242875	-0.0927023	0.0410397	5.92341	0.00737661	0.00269467	0.000107917	0.00359322	0.00359322	0.937765	1.62173	0.614616	0.937765
ENSMUSG00000002763	Pex6	0.0239166	0.242956	0.072764	0.0322183	6.732	0.0055743	0.00128076	0.00224945	0.00259452	0.00259452	1.05173	1.6213	0.614472	1.05173
ENSMUSG00000007682	Dio2	0.0239401	0.243035	0.229422	0.1016	4.29434	1.6161	0.0268638	0.00093814	0.0116739	0.0116739	1.17237	1.62087	0.614332	1.17237
ENSMUSG00000038646	Ramac	0.0239915	0.243397	-0.0710981	0.0314975	6.81504	0.00463243	0.00117207	0.000284823	0.00253173	0.00253173	0.951913	1.61994	0.613685	0.951913
ENSMUSG00000026499	Acbd3	0.0240492	0.2438	0.0679452	0.030113	7.00311	0.00392652	0.000932629	0.00245273	0.00241244	0.00245273	1.04822	1.6189	0.612965	1.04822
ENSMUSG00000033007	Asic4	0.0240644	0.2438	-0.586003	0.259742	2.71399	2.24826	0.185662	0.0662101	0.0468756	0.0662101	0.666186	1.61862	0.612965	0.666186
ENSMUSG00000033126	Ybey	0.0240944	0.2438	-0.120011	0.0532053	5.09365	0.00994608	0.0044689	0.00106391	0.00609943	0.00609943	0.920181	1.61808	0.612965	0.920181
ENSMUSG00000079508	Apoo	0.0240917	0.2438	-0.0957677	0.0424566	6.22806	0.0147204	0.00350412	0.00322544	0.0031064	0.00322544	0.935774	1.61813	0.612965	0.935774
ENSMUSG00000033004	Mycbp2	0.0242102	0.244265	-0.0859142	0.0381201	6.48186	0.00589936	0.00260387	0.00204096	0.00282119	0.00282119	0.942187	1.616	0.612139	0.942187
ENSMUSG00000044197	Gpr146	0.0242432	0.244265	0.283843	0.12597	3.35288	0.0723677	0.0288959	0.0303465	0.0270524	0.0303465	1.21743	1.61541	0.612139	1.21743
ENSMUSG00000043614	Vps37d	0.0243002	0.244265	0.0990126	0.0439597	5.66955	0.00797404	0.00308015	0.00382228	0.00413435	0.00413435	1.07104	1.61439	0.612139	1.07104
ENSMUSG00000037362	Ccn3	0.0242277	0.244265	0.59787	0.265308	2.21212	1.22635	0.193721	0.0474001	0.0690611	0.0690611	1.51348	1.61569	0.612139	1.51348
ENSMUSG00000043943	Naalad2	0.0243142	0.244265	0.419648	0.186334	2.15579	0.132447	0.0576499	0.0480733	0.071973	0.071973	1.3376	1.61414	0.612139	1.3376
ENSMUSG00000030697	Ppp4c	0.0243009	0.244265	-0.0620035	0.0275285	7.36433	0.00844683	0.000577435	0.00218079	0.00225176	0.00225176	0.957933	1.61438	0.612139	0.957933
ENSMUSG00000020034	Tcp11l2	0.0241704	0.244265	0.276475	0.122638	3.37744	0.108985	0.0191588	0.0369905	0.0264614	0.0369905	1.21123	1.61672	0.612139	1.21123
ENSMUSG00000036372	Tmem258	0.024278	0.244265	-0.0818417	0.0363305	6.765	0.0107491	0.00235889	0.000140825	0.00256875	0.00256875	0.944851	1.61479	0.612139	0.944851
ENSMUSG00000029911	Ssbp1	0.0242339	0.244265	-0.0733716	0.0325604	6.9192	0.00600426	0.00119349	0.00276451	0.00246205	0.00276451	0.950414	1.61558	0.612139	0.950414
ENSMUSG00000064138	Fam172a	0.0242924	0.244265	0.0946815	0.0420345	5.44704	0.0049373	0.00183558	0.00154209	0.00476083	0.00476083	1.06783	1.61453	0.612139	1.06783
ENSMUSG00000033486	Catsper2	0.0242461	0.244265	-0.415518	0.184412	2.85846	0.131507	0.0853386	0.00424608	0.0416237	0.0416237	0.74975	1.61536	0.612139	0.74975
ENSMUSG00000047423	AI837181	0.0244274	0.245242	-0.0838363	0.0372549	6.39341	0.00795331	0.0015608	0.00362081	0.00291158	0.00362081	0.943545	1.61212	0.610406	0.943545
ENSMUSG00000023018	Smarcd1	0.024462	0.24543	-0.0702406	0.0312209	6.43397	0.0120954	0.000769823	0.00116444	0.00286922	0.00286922	0.952479	1.61151	0.610072	0.952479
ENSMUSG00000034566	Atp5h	0.0244784	0.245435	-0.067196	0.029871	7.50667	0.00818751	0.000601472	0.0027297	0.00220941	0.0027297	0.954491	1.61122	0.610063	0.954491
ENSMUSG00000028101	Pias3	0.0244998	0.24549	0.110743	0.0492367	5.57938	0.0277804	0.00300814	0.00604239	0.00437077	0.00604239	1.07978	1.61084	0.609966	1.07978
ENSMUSG00000032580	Rbm5	0.0245213	0.245547	0.0680136	0.0302436	6.96075	0.0131289	0.000977985	0.00132342	0.0024368	0.0024368	1.04827	1.61046	0.609865	1.04827
ENSMUSG00000040025	Ythdf2	0.0245582	0.245757	-0.0701227	0.0311895	7.30532	0.00522625	0.00135892	0.00175032	0.00227281	0.00227281	0.952557	1.6098	0.609494	0.952557
ENSMUSG00000031586	Rbpms	0.0246057	0.246073	-0.11387	0.0506643	4.97966	0.0693141	0.0029367	0.00529195	0.0066463	0.0066463	0.924106	1.60896	0.608936	0.924106
ENSMUSG00000031442	Mcf2l	0.0246524	0.246221	0.166407	0.0740637	6.02308	0.0280103	0.0153121	0.00516684	0.00341764	0.00516684	1.12226	1.60814	0.608675	1.12226
ENSMUSG00000066979	Bub3	0.0246423	0.246221	-0.0589998	0.0262575	8.04866	0.00549717	0.000422657	0.00175907	0.00215132	0.00215132	0.959929	1.60832	0.608675	0.959929
ENSMUSG00000026727	Rsu1	0.0246851	0.246388	-0.114302	0.0508846	6.02578	0.0173072	0.00518415	0.00448234	0.00341308	0.00448234	0.923829	1.60757	0.60838	0.923829
ENSMUSG00000036196	Slc26a8	0.0247393	0.24677	-0.70533	0.314115	2.10405	0.421644	0.293632	0.0653613	0.0747298	0.0747298	0.613302	1.60661	0.607708	0.613302
ENSMUSG00000030983	Bccip	0.0249219	0.247133	-0.0694761	0.03098	6.92856	0.00950176	0.00112687	0.0013426	0.00245624	0.00245624	0.952984	1.60342	0.607069	0.952984
ENSMUSG00000028028	Alpk1	0.0248748	0.247133	-0.29007	0.129303	3.76167	0.145782	0.0437416	-0.00669916	0.0186768	0.0186768	0.817862	1.60424	0.607069	0.817862
ENSMUSG00000027489	Necab3	0.0248773	0.247133	-0.565409	0.252043	1.73525	0.234319	0.14036	0.0176345	0.0968028	0.0968028	0.675764	1.6042	0.607069	0.675764
ENSMUSG00000021598	Med10	0.0248564	0.247133	-0.0869513	0.0387548	5.8686	0.00905886	0.00190997	0.00355763	0.00369726	0.00369726	0.94151	1.60456	0.607069	0.94151
ENSMUSG00000024966	Stip1	0.0249517	0.247133	-0.0577747	0.0257675	8.80128	0.00623428	0.000140051	0.00170945	0.00233876	0.00233876	0.960745	1.6029	0.607069	0.960745
ENSMUSG00000025219	Fgf8	0.0249349	0.247133	-0.345583	0.154112	5.05757	0.275672	0.00941794	0.0792511	0.00626546	0.0792511	0.78699	1.60319	0.607069	0.78699
ENSMUSG00000029723	Tsc22d4	0.0248117	0.247133	0.112142	0.049967	6.24105	0.0140313	0.00433158	0.00498943	0.00308951	0.00498943	1.08083	1.60534	0.607069	1.08083
ENSMUSG00000090862	Rps13	0.0249448	0.247133	-0.964121	0.429978	7.38297	1.32687	0.00583122	0.684391	0.00224554	0.684391	0.512591	1.60302	0.607069	0.512591
ENSMUSG00000024900	Cpt1a	0.0248259	0.247133	0.152041	0.0677516	4.13906	0.0621603	0.00380058	0.00676562	0.0133365	0.0133365	1.11114	1.60509	0.607069	1.11114
ENSMUSG00000035212	Leprot	0.0249309	0.247133	-0.0690404	0.0307876	6.80487	0.0122009	0.000999687	0.00231356	0.00253906	0.00253906	0.953272	1.60326	0.607069	0.953272
ENSMUSG00000072980	Oip5	0.0249088	0.247133	-0.0854353	0.0380929	6.26174	0.0124362	0.00235409	0.00278561	0.00306324	0.00306324	0.9425	1.60365	0.607069	0.9425
ENSMUSG00000035697	Arhgap45	0.0249794	0.24725	-0.148778	0.0663678	5.84638	0.030557	0.00301443	0.0134298	0.00374119	0.0134298	0.902014	1.60242	0.606864	0.902014
ENSMUSG00000037730	Mynn	0.0250961	0.248153	0.161237	0.0719834	6.68705	0.0257261	0.00890797	0.0104367	0.00263145	0.0104367	1.11825	1.60039	0.605281	1.11825
ENSMUSG00000027589	Pcmtd2	0.0251349	0.248153	0.102539	0.04579	5.26268	0.00918014	0.00242897	0.00169608	0.00539881	0.00539881	1.07366	1.59972	0.605281	1.07366
ENSMUSG00000018848	Rars	0.0251196	0.248153	-0.0701061	0.0313035	6.18948	0.0064038	0.000499811	0.00168817	0.00315852	0.00315852	0.952568	1.59999	0.605281	0.952568
ENSMUSG00000042138	Msantd2	0.0251155	0.248153	0.1266	0.0565272	5.03997	0.00741666	0.00558051	-0.00153185	0.00634872	0.00634872	1.09172	1.60006	0.605281	1.09172
ENSMUSG00000031639	Tlr3	0.0251578	0.24822	0.479946	0.21436	1.77715	0.195236	0.0774776	0.0859771	0.0940695	0.0940695	1.39469	1.59933	0.605163	1.39469
ENSMUSG00000029993	Nfu1	0.0252302	0.248617	-0.165341	0.0738837	6.07537	0.0399914	0.00701466	0.0133648	0.00333142	0.0133648	0.891718	1.59808	0.60447	0.891718
ENSMUSG00000018999	Slc35b4	0.0252299	0.248617	0.0827155	0.0369618	6.68306	0.00955523	0.00246555	0.000632237	0.00263484	0.00263484	1.05901	1.59809	0.60447	1.05901
ENSMUSG00000038279	Nop2	0.0252804	0.248795	-0.0896632	0.0400803	6.81268	0.00710677	0.00104117	0.00495616	0.00253342	0.00495616	0.939742	1.59722	0.604159	0.939742
ENSMUSG00000019806	Aig1	0.0252743	0.248795	0.168736	0.0754235	4.97016	0.0507876	0.010254	0.0109838	0.00669499	0.0109838	1.12407	1.59732	0.604159	1.12407
ENSMUSG00000061306	Slc38a10	0.0253817	0.249632	-0.0817321	0.0365603	6.40233	0.00990386	0.00161657	0.0033736	0.00290212	0.0033736	0.944922	1.59548	0.602699	0.944922
ENSMUSG00000038299	Wdr36	0.0254111	0.249763	-0.0628061	0.0281	7.3709	0.0048451	0.000698324	0.00145856	0.00224954	0.00224954	0.9574	1.59498	0.602472	0.9574
ENSMUSG00000024158	Hagh	0.0254567	0.250052	-0.166858	0.0746769	4.39102	0.0183495	0.0100675	-0.00215983	0.010752	0.010752	0.89078	1.5942	0.60197	0.89078
ENSMUSG00000026042	Col5a2	0.0255089	0.250087	0.0890632	0.0398742	7.36595	0.0182456	0.000328491	0.00560732	0.00225121	0.00560732	1.06368	1.59331	0.601908	1.06368
ENSMUSG00000071337	Tia1	0.0255038	0.250087	0.06208	0.0277926	7.49404	0.0074626	0.000671047	0.0016543	0.00221269	0.00221269	1.04397	1.5934	0.601908	1.04397
ENSMUSG00000000384	Tbrg4	0.0254946	0.250087	-0.0975304	0.0436607	5.80017	0.00743542	0.0032806	0.0027294	0.00383609	0.00383609	0.934632	1.59355	0.601908	0.934632
ENSMUSG00000049739	Zfp646	0.0256431	0.251244	-0.0764472	0.0342571	7.3699	0.0052759	0.000821658	0.00355959	0.00224988	0.00355959	0.94839	1.59103	0.599904	0.94839
ENSMUSG00000032112	Trappc4	0.025721	0.251491	-0.0840585	0.0376876	6.35057	0.00611462	0.00234437	0.00201728	0.0029583	0.0029583	0.9434	1.58971	0.599477	0.9434
ENSMUSG00000028525	Pde4b	0.0257052	0.251491	0.210915	0.0945536	5.05196	0.226053	0.00760329	0.0257741	0.00629186	0.0257741	1.15742	1.58998	0.599477	1.15742
ENSMUSG00000020553	Pctp	0.0256934	0.251491	-0.151491	0.0679084	5.72233	0.0510311	0.00362573	0.0135907	0.00400802	0.0135907	0.90032	1.59018	0.599477	0.90032
ENSMUSG00000025212	Sfxn3	0.0257335	0.251491	0.277426	0.124395	4.47546	0.124511	0.02055	0.0372197	0.0100104	0.0372197	1.21203	1.5895	0.599477	1.21203
ENSMUSG00000004891	Nes	0.0257651	0.251641	-0.158784	0.0712121	7.76459	0.0893378	0.000655099	0.0182772	0.00216183	0.0182772	0.89578	1.58897	0.599218	0.89578
ENSMUSG00000063727	Tnfrsf11b	0.0258641	0.252284	0.531077	0.238339	2.67926	0.317541	0.0834068	0.128666	0.0482085	0.128666	1.44501	1.5873	0.59811	1.44501
ENSMUSG00000022553	Maf1	0.0258799	0.252284	-0.110098	0.0494152	6.45334	0.0176198	0.00626672	-0.00143098	0.00284956	0.00284956	0.926525	1.58704	0.59811	0.926525
ENSMUSG00000025931	Paqr8	0.0258694	0.252284	0.127852	0.05738	4.87746	0.087534	0.0050951	-0.00271483	0.00719676	0.00719676	1.09267	1.58721	0.59811	1.09267
ENSMUSG00000020723	Cacng4	0.0259495	0.252316	0.193657	0.0869601	5.09162	0.235997	0.00594737	0.0222843	0.0061086	0.0222843	1.14366	1.58587	0.598055	1.14366
ENSMUSG00000018727	Cpsf4l	0.0259648	0.252316	0.436795	0.196159	2.69196	0.216985	0.0959352	-0.0628893	0.0477178	0.0477178	1.35359	1.58561	0.598055	1.35359
ENSMUSG00000066149	Cdc26	0.0259251	0.252316	-0.0929512	0.0417321	8.09335	0.0123755	0.00113483	0.00536702	0.00215361	0.00536702	0.937603	1.58628	0.598055	0.937603
ENSMUSG00000047676	Rpsa-ps10	0.0259341	0.252316	0.218425	0.0980716	4.49045	0.0556597	0.0187524	0.0171549	0.00988468	0.0171549	1.16346	1.58613	0.598055	1.16346
ENSMUSG00000030980	Knop1	0.0259548	0.252316	-0.0620433	0.027861	8.03136	0.0070365	0.00074722	0.00188641	0.00215072	0.00215072	0.957906	1.58578	0.598055	0.957906
ENSMUSG00000020823	Sec14l1	0.026021	0.252703	0.0656418	0.02949	7.27191	0.0121452	0.000961081	0.00127618	0.00228566	0.00228566	1.04655	1.58468	0.597389	1.04655
ENSMUSG00000031819	Emc8	0.0261653	0.253786	-0.12408	0.0557978	6.32788	0.0248428	0.00421286	0.00741047	0.002984	0.00741047	0.917589	1.58227	0.595533	0.917589
ENSMUSG00000024006	Stk38	0.0261611	0.253786	0.070611	0.0317522	6.70653	0.00731199	0.00114878	7.69282e-05	0.00261518	0.00261518	1.05016	1.58234	0.595533	1.05016
ENSMUSG00000026824	Kcnj3	0.0262121	0.254079	0.946103	0.425587	2.23165	0.862138	0.156497	0.5197	0.0680727	0.5197	1.92666	1.5815	0.595031	1.92666
ENSMUSG00000075478	Slitrk1	0.02627	0.254481	0.649704	0.29237	2.76629	0.497835	0.0867953	0.232331	0.0449204	0.232331	1.56885	1.58054	0.594344	1.56885
ENSMUSG00000001383	Zmat2	0.0262876	0.254493	-0.0755636	0.034008	7.34775	0.0069196	0.00171362	0.00260414	0.00225746	0.00260414	0.948971	1.58025	0.594325	0.948971
ENSMUSG00000032596	Uba7	0.0263165	0.254496	-0.300199	0.135133	5.46552	0.0796819	0.0355634	0.0326106	0.00470318	0.0326106	0.81214	1.57977	0.594319	0.81214
ENSMUSG00000034194	R3hcc1	0.0263209	0.254496	-0.0957991	0.0431247	6.21484	0.00745871	0.0038191	-0.000257207	0.00312393	0.00312393	0.935754	1.5797	0.594319	0.935754
ENSMUSG00000046761	Fam83h	0.0263449	0.254568	-0.120258	0.0541439	5.29159	0.0191987	0.00525059	0.0056939	0.0052907	0.0056939	0.920023	1.5793	0.594195	0.920023
ENSMUSG00000068917	Clk2	0.0263855	0.254801	0.0680136	0.03063	7.43945	0.00399329	0.00127466	0.000709717	0.00222794	0.00222794	1.04827	1.57864	0.593799	1.04827
ENSMUSG00000063953	Amd2	0.0264781	0.255536	-0.0969808	0.0437022	6.21229	0.0089411	0.00356409	0.00356614	0.00312734	0.00356614	0.934988	1.57711	0.592548	0.934988
ENSMUSG00000064367	mt-Nd5	0.0265008	0.25556	-0.155096	0.0699009	9.53286	0.0385875	7.49075e-05	0.0181666	0.00287856	0.0181666	0.898073	1.57674	0.592507	0.898073
ENSMUSG00000021668	Polk	0.0265148	0.25556	0.134945	0.0608248	5.00107	0.0164893	0.00727359	5.0297e-05	0.00653845	0.00653845	1.09805	1.57651	0.592507	1.09805
ENSMUSG00000041560	Nop53	0.0265467	0.25556	-0.0664361	0.0299516	8.36777	0.0173187	0.000980011	0.00236915	0.00219146	0.00236915	0.954994	1.57599	0.592507	0.954994
ENSMUSG00000083218	Gm16425	0.0265328	0.25556	-0.497097	0.224087	2.39835	0.107251	0.127403	-0.0826552	0.0600662	0.0600662	0.708531	1.57622	0.592507	0.708531
ENSMUSG00000068699	Flnc	0.026587	0.255788	0.167641	0.075598	6.38148	0.426102	0.00390321	0.017433	0.00292437	0.017433	1.12322	1.57533	0.592119	1.12322
ENSMUSG00000001497	Pax9	0.026622	0.255965	0.339912	0.15332	6.78592	0.703632	0.00254746	0.0852116	0.00255297	0.0852116	1.26568	1.57476	0.591819	1.26568
ENSMUSG00000040312	Cchcr1	0.0266612	0.256183	-0.0938488	0.0423421	6.54559	0.00687683	0.00393347	0.00111105	0.00275983	0.00275983	0.93702	1.57412	0.59145	0.93702
ENSMUSG00000026587	Astn1	0.026751	0.256886	0.197553	0.0891836	4.1454	0.0713999	0.00427207	0.0254218	0.0132632	0.0254218	1.14675	1.57266	0.59026	1.14675
ENSMUSG00000008153	Clstn3	0.0267904	0.256985	0.204999	0.0925687	3.61354	0.0696973	0.0106232	-0.00103001	0.0213676	0.0213676	1.15269	1.57202	0.590092	1.15269
ENSMUSG00000034037	Fgd5	0.0267946	0.256985	0.1459	0.065884	5.476	0.0161859	0.0115343	-0.00239789	0.004671	0.004671	1.10642	1.57195	0.590092	1.10642
ENSMUSG00000024644	Cndp2	0.0268554	0.257409	-0.0905714	0.0409156	5.9586	0.0108093	0.00264717	0.00360276	0.00352936	0.00360276	0.939151	1.57097	0.589376	0.939151
ENSMUSG00000023495	Pcbp4	0.0269044	0.257663	-0.0998957	0.0451424	7.38136	0.028671	0.00125103	0.00635689	0.00224607	0.00635689	0.9331	1.57018	0.588948	0.9331
ENSMUSG00000040688	Tbl3	0.0269153	0.257663	-0.0805789	0.0364158	6.09249	0.00962449	0.00132968	0.00362114	0.00330393	0.00362114	0.945678	1.57	0.588948	0.945678
ENSMUSG00000026888	Grb14	0.0269982	0.258297	0.305215	0.13801	2.86629	0.0798608	0.0297556	0.0352511	0.0413524	0.0413524	1.2356	1.56866	0.587881	1.2356
ENSMUSG00000030878	Cdr2	0.0270506	0.258638	-0.0833374	0.0376958	6.40642	0.013185	0.00193385	0.00337112	0.00289781	0.00337112	0.943872	1.56782	0.587308	0.943872
ENSMUSG00000038910	Plcl2	0.0271025	0.258974	-0.0754688	0.0341482	6.51244	0.0206996	0.001562	0.00249321	0.00279143	0.00279143	0.949034	1.56699	0.586744	0.949034
ENSMUSG00000022109	Med4	0.0271666	0.259383	-0.0683697	0.0309489	6.94365	0.00496836	0.0011289	0.00097506	0.00244702	0.00244702	0.953715	1.56596	0.586059	0.953715
ENSMUSG00000040888	Gfer	0.0271886	0.259383	-0.0894792	0.0405103	6.06343	0.00758146	0.00277593	0.000492592	0.00335079	0.00335079	0.939862	1.56561	0.586059	0.939862
ENSMUSG00000008668	Rps18	0.0271957	0.259383	-0.0657772	0.029781	9.11375	0.0148376	0.000115384	0.00319574	0.0025192	0.00319574	0.95543	1.5655	0.586059	0.95543
ENSMUSG00000032394	Igdcc3	0.0272693	0.259605	-0.541414	0.245246	7.26261	0.458474	0.00127421	0.223269	0.00228935	0.223269	0.687097	1.56433	0.585688	0.687097
ENSMUSG00000022407	Adsl	0.0272561	0.259605	-0.0752535	0.0340848	6.40005	0.0108172	0.00143276	0.00283305	0.00290453	0.00290453	0.949175	1.56454	0.585688	0.949175
ENSMUSG00000082895	Rpsa-ps9	0.0272445	0.259605	0.254258	0.115153	3.78223	0.0808208	0.0253327	0.0241723	0.0183317	0.0241723	1.19272	1.56472	0.585688	1.19272
ENSMUSG00000020277	Pfkl	0.027333	0.260047	0.0831119	0.0376629	6.40676	0.0251053	0.00102679	0.00426893	0.00289746	0.00426893	1.0593	1.56331	0.584947	1.0593
ENSMUSG00000084221	Hmgb1-ps4	0.0273495	0.260047	0.329502	0.149333	3.12246	0.0563383	0.0500611	-0.0214814	0.0331935	0.0331935	1.25658	1.56305	0.584947	1.25658
ENSMUSG00000028173	Wls	0.0273919	0.26029	0.0592619	0.0268653	7.76691	0.00568113	0.000532948	0.00215882	0.00216157	0.00216157	1.04193	1.56238	0.584542	1.04193
ENSMUSG00000018451	6330403K07Rik	0.0274209	0.260406	0.145061	0.065773	7.49282	0.0540783	0.000599492	0.0155512	0.00221301	0.0155512	1.10578	1.56192	0.584349	1.10578
ENSMUSG00000036989	Trim3	0.0275195	0.260801	0.11318	0.0513505	5.72821	0.0208702	0.00555429	0.00429005	0.00399446	0.00429005	1.08161	1.56036	0.58369	1.08161
ENSMUSG00000025237	Parp6	0.0275301	0.260801	0.11855	0.0537904	5.97115	0.0145911	0.00502381	0.00577825	0.0035071	0.00577825	1.08564	1.56019	0.58369	1.08564
ENSMUSG00000003345	Csnk1g2	0.027511	0.260801	-0.0695905	0.0315719	6.58488	0.00764451	0.000998253	0.00133927	0.00272308	0.00272308	0.952908	1.56049	0.58369	0.952908
ENSMUSG00000050199	Lgr4	0.0274931	0.260801	0.0818273	0.0371192	6.8012	0.0371348	0.000885256	0.00425867	0.00254172	0.00425867	1.05836	1.56078	0.58369	1.05836
ENSMUSG00000028391	Wdr31	0.027577	0.261085	-0.134518	0.0610543	4.70096	0.0090159	0.00562028	-0.00158726	0.0082962	0.0082962	0.910974	1.55945	0.583217	0.910974
ENSMUSG00000026554	Dcaf8	0.0276653	0.261441	0.0637256	0.0289399	7.97615	0.00365479	0.000976844	0.00141927	0.00214989	0.00214989	1.04516	1.55806	0.582626	1.04516
ENSMUSG00000050271	Prag1	0.0276346	0.261441	-0.0824438	0.037433	6.21739	0.00653385	0.00211074	0.00222763	0.00312052	0.00312052	0.944456	1.55855	0.582626	0.944456
ENSMUSG00000019027	Dnah1	0.0276494	0.261441	0.140581	0.0638357	6.12107	0.0562652	0.00645877	0.00875457	0.00325889	0.00875457	1.10235	1.55831	0.582626	1.10235
ENSMUSG00000063802	Hspbp1	0.0276948	0.26156	-0.0821568	0.0373171	5.97386	0.0146359	0.00169659	0.00343941	0.00350234	0.00350234	0.944644	1.5576	0.582429	0.944644
ENSMUSG00000020956	Dtd2	0.0277521	0.261941	-0.121349	0.0551393	5.08164	0.0159018	0.0051966	0.000369215	0.00615401	0.00615401	0.919328	1.5567	0.581796	0.919328
ENSMUSG00000061535	C1qtnf7	0.0278516	0.2624	0.81405	0.370129	1.94226	2.65485	0.213012	0.298436	0.083874	0.298436	1.75814	1.55515	0.581036	1.75814
ENSMUSG00000022536	Glyr1	0.0278403	0.2624	-0.0563063	0.0255993	8.33449	0.00297194	0.000261872	0.000417534	0.00218466	0.00218466	0.961723	1.55533	0.581036	0.961723
ENSMUSG00000029632	Ndufa4	0.0278385	0.2624	-0.067767	0.0308094	7.09291	0.00767588	0.000534742	0.00300901	0.00236507	0.00300901	0.954114	1.55535	0.581036	0.954114
ENSMUSG00000059363	Fxn	0.0278788	0.262496	-0.0988127	0.0449356	5.77244	0.0115166	0.00315014	0.00438822	0.00389551	0.00438822	0.933801	1.55473	0.580877	0.933801
ENSMUSG00000032598	Nckipsd	0.0279381	0.262577	0.254105	0.115599	3.84623	0.0733732	0.0325887	0.00723298	0.0173005	0.0173005	1.1926	1.5538	0.580744	1.1926
ENSMUSG00000035299	Mid1	0.0279554	0.262577	-0.114768	0.0522166	6.30524	0.0192383	0.00212529	0.00805392	0.00301036	0.00805392	0.923531	1.55353	0.580744	0.923531
ENSMUSG00000000740	Rpl13	0.027907	0.262577	-0.0623765	0.0283711	9.58123	0.0103359	7.50004e-05	0.00241372	0.00293004	0.00293004	0.957685	1.55429	0.580744	0.957685
ENSMUSG00000002227	Mov10	0.0279451	0.262577	0.0822866	0.0374361	7.1771	0.0437945	0.00216163	0.00307048	0.00232544	0.00307048	1.05869	1.5537	0.580744	1.05869
ENSMUSG00000030452	Nipa2	0.0281326	0.263352	-0.1159	0.0527912	6.46369	0.010159	0.00756529	0.000337964	0.00283919	0.00283919	0.922807	1.55079	0.579464	0.922807
ENSMUSG00000063556	Gm10132	0.0281626	0.263352	-1.29713	0.590943	1.46662	1.55611	1.18791	-0.0229171	0.115827	0.115827	0.406935	1.55033	0.579464	0.406935
ENSMUSG00000039671	Zmynd8	0.0281662	0.263352	-0.084659	0.0385697	6.21249	0.00949203	0.0024267	0.0030663	0.00312707	0.00312707	0.943007	1.55027	0.579464	0.943007
ENSMUSG00000047414	Flrt2	0.028084	0.263352	0.160879	0.0732562	8.21348	0.0964678	0.00030166	0.0197332	0.00216512	0.0197332	1.11797	1.55154	0.579464	1.11797
ENSMUSG00000051339	2900026A02Rik	0.0281242	0.263352	0.0890855	0.0405755	5.99611	0.0172224	0.00262701	0.00351945	0.00346359	0.00351945	1.0637	1.55092	0.579464	1.0637
ENSMUSG00000030316	Tamm41	0.0281742	0.263352	-0.0952073	0.0433776	5.84851	0.01594	0.00250846	0.00451623	0.00373693	0.00451623	0.936138	1.55015	0.579464	0.936138
ENSMUSG00000033885	Pxk	0.0281017	0.263352	0.155919	0.0710058	5.38714	0.0239241	0.0138676	-0.00303407	0.00495518	0.00495518	1.11413	1.55127	0.579464	1.11413
ENSMUSG00000032036	Kirrel3	0.0281618	0.263352	0.325951	0.148495	3.54301	0.276847	0.0561613	0.0261618	0.0227817	0.0261618	1.25349	1.55034	0.579464	1.25349
ENSMUSG00000046711	Hmga1	0.0284812	0.26606	-0.12868	0.0587421	7.60087	0.0412494	0.00102861	0.0118538	0.00218775	0.0118538	0.914668	1.54544	0.57502	0.914668
ENSMUSG00000015852	Fcrls	0.0285083	0.266152	0.468422	0.21387	2.919	0.201649	0.0762717	0.0944924	0.0395592	0.0944924	1.3836	1.54503	0.57487	1.3836
ENSMUSG00000058799	Nap1l1	0.0285865	0.266721	-0.0605337	0.0276518	9.40838	0.00710672	9.84251e-05	0.00182279	0.00275616	0.00275616	0.958909	1.54384	0.573942	0.958909
ENSMUSG00000043415	Otud1	0.0286667	0.267006	0.274618	0.125509	3.57309	0.165863	0.0366412	-0.00635203	0.0221678	0.0221678	1.20967	1.54262	0.57348	1.20967
ENSMUSG00000027808	Serp1	0.0286741	0.267006	-0.0588578	0.026901	8.11573	0.00435687	0.000278038	0.00242365	0.00215517	0.00242365	0.960024	1.54251	0.57348	0.960024
ENSMUSG00000003411	Rab3b	0.0286861	0.267006	0.303575	0.13876	3.30727	0.0992828	0.0437016	-0.00864171	0.0281811	0.0281811	1.2342	1.54233	0.57348	1.2342
ENSMUSG00000044627	Swi5	0.0286857	0.267006	-0.0681222	0.0311376	7.73268	0.0138318	0.000580036	0.00303962	0.00216573	0.00303962	0.953879	1.54233	0.57348	0.953879
ENSMUSG00000037750	Fam222b	0.0287455	0.267238	-0.0773071	0.0353491	6.55071	0.00808323	0.00191002	-0.000451145	0.00275501	0.00275501	0.947825	1.54143	0.573102	0.947825
ENSMUSG00000072501	Phf20l1	0.0287457	0.267238	0.0765395	0.0349982	7.1424	0.00623844	0.00223161	0.000609981	0.00234125	0.00234125	1.05449	1.54143	0.573102	1.05449
ENSMUSG00000079553	Kifc1	0.0287724	0.267325	-0.0647852	0.0296284	7.27739	0.00338611	0.000993767	0.000637436	0.0022835	0.0022835	0.956088	1.54102	0.57296	0.956088
ENSMUSG00000008384	Sertad1	0.0288599	0.267978	0.166514	0.076194	4.33879	0.0300895	0.0104338	0.00641897	0.0112401	0.0112401	1.12234	1.5397	0.571901	1.12234
ENSMUSG00000044712	Slc38a6	0.028925	0.268415	-0.127533	0.0583807	7.36357	0.0599868	0.00018032	0.012544	0.00225201	0.012544	0.915395	1.53873	0.571194	0.915395
ENSMUSG00000096910	Zfp955b	0.0289417	0.268415	0.0941565	0.0431064	6.02262	0.00940225	0.00351874	0.000400266	0.00341841	0.00341841	1.06744	1.53848	0.571194	1.06744
ENSMUSG00000034684	Sema3f	0.0291165	0.268862	0.11407	0.0522799	6.50774	0.024847	0.00159146	0.00861242	0.00279597	0.00861242	1.08228	1.53586	0.570471	1.08228
ENSMUSG00000027684	Mecom	0.029139	0.268862	0.108948	0.0499393	6.79194	0.0651489	0.00443957	0.00487111	0.00254851	0.00487111	1.07844	1.53553	0.570471	1.07844
ENSMUSG00000020363	Gfpt2	0.0291894	0.268862	-0.142234	0.0652177	6.48149	0.0733769	0.00168041	0.0141987	0.00282155	0.0141987	0.906115	1.53477	0.570471	0.906115
ENSMUSG00000049556	Lingo1	0.0291682	0.268862	0.236395	0.108378	3.67862	0.097865	0.0218776	0.0219734	0.0201401	0.0219734	1.17805	1.53509	0.570471	1.17805
ENSMUSG00000022987	Zfp641	0.0290574	0.268862	0.430396	0.197185	2.6347	0.373994	0.0951982	0.0453549	0.0499605	0.0499605	1.3476	1.53674	0.570471	1.3476
ENSMUSG00000031432	Prps1	0.029207	0.268862	-0.148124	0.0679256	6.62924	0.0330768	0.00460611	0.0126191	0.00268225	0.0126191	0.902423	1.53451	0.570471	0.902423
ENSMUSG00000034586	Hid1	0.0290199	0.268862	0.302087	0.138368	2.83247	0.241266	0.0289427	-0.00163797	0.0425345	0.0425345	1.23293	1.5373	0.570471	1.23293
ENSMUSG00000001985	Grik3	0.0291997	0.268862	-0.251469	0.115312	4.06689	0.432078	0.0241696	0.0254716	0.0142057	0.0254716	0.840041	1.53462	0.570471	0.840041
ENSMUSG00000025089	Gfra1	0.0291269	0.268862	0.385931	0.176889	4.92717	0.160411	0.0272704	0.0895451	0.00692155	0.0895451	1.3067	1.53571	0.570471	1.3067
ENSMUSG00000045767	B230219D22Rik	0.0290762	0.268862	0.06047	0.0277074	8.45209	0.00924118	0.000216199	0.00264987	0.00221147	0.00264987	1.04281	1.53646	0.570471	1.04281
ENSMUSG00000052214	Opa3	0.0292161	0.268862	-0.0772639	0.0354331	5.99773	0.00443651	0.00122642	0.00197721	0.0034608	0.0034608	0.947854	1.53438	0.570471	0.947854
ENSMUSG00000029094	Afap1	0.0290886	0.268862	0.0909422	0.041673	5.64606	0.00608387	0.00229007	0.00208008	0.00419338	0.00419338	1.06507	1.53628	0.570471	1.06507
ENSMUSG00000072653	Zfp783	0.0291804	0.268862	0.144698	0.0663436	4.84923	0.0249974	0.00907264	-0.000957099	0.00735952	0.00735952	1.1055	1.53491	0.570471	1.1055
ENSMUSG00000028821	Syf2	0.0293016	0.269327	-0.0826091	0.0379044	5.89077	0.00701868	0.00170938	0.00270693	0.00365447	0.00365447	0.944348	1.53311	0.56972	0.944348
ENSMUSG00000028851	Nudc	0.0292996	0.269327	-0.0667329	0.0306194	7.32045	0.015098	0.000414368	0.00308581	0.00226721	0.00308581	0.954798	1.53314	0.56972	0.954798
ENSMUSG00000082896	Gm5844	0.0293301	0.269429	0.262035	0.120254	4.0061	0.0673739	0.0194122	0.0345754	0.0149904	0.0345754	1.19917	1.53269	0.569556	1.19917
ENSMUSG00000053216	Btn2a2	0.0293519	0.269469	0.258858	0.118811	3.49081	0.0617882	0.028814	0.018189	0.0238862	0.0238862	1.19653	1.53236	0.569492	1.19653
ENSMUSG00000026234	Ncl	0.0293841	0.269604	-0.0557498	0.0255933	8.34119	0.00823743	8.94265e-05	0.00235598	0.00218598	0.00235598	0.962094	1.53189	0.569273	0.962094
ENSMUSG00000034522	Zfp395	0.029483	0.269711	0.14081	0.0646819	4.3933	0.0149471	0.0048881	0.00355679	0.0107312	0.0107312	1.10252	1.53043	0.569101	1.10252
ENSMUSG00000042249	Grk3	0.0294828	0.269711	0.148867	0.0683828	4.53377	0.0428321	0.00792672	0.00524394	0.00953114	0.00953114	1.1087	1.53043	0.569101	1.1087
ENSMUSG00000073792	Alg6	0.0294485	0.269711	-0.180412	0.0828555	4.4148	0.0264387	0.0150921	0.00428996	0.0105373	0.0105373	0.882451	1.53094	0.569101	0.882451
ENSMUSG00000044707	Ccnjl	0.0294653	0.269711	-0.105915	0.048647	5.92849	0.0243781	0.00260571	0.00622935	0.00358386	0.00622935	0.929216	1.53069	0.569101	0.929216
ENSMUSG00000039615	Stub1	0.0294434	0.269711	-0.0596018	0.0273717	7.60592	0.00836689	0.000610314	0.00148662	0.00218673	0.00218673	0.959529	1.53101	0.569101	0.959529
ENSMUSG00000081603	Gm14681	0.0295068	0.269769	0.407715	0.187313	3.25059	0.133652	0.101346	-0.0392644	0.0296427	0.0296427	1.32658	1.53008	0.569008	1.32658
ENSMUSG00000019997	Ccn2	0.0295504	0.269848	-0.237936	0.109342	5.8222	0.128902	0.00433513	0.0402995	0.00379025	0.0402995	0.847958	1.52944	0.568881	0.847958
ENSMUSG00000027905	Ddx20	0.029543	0.269848	-0.0682047	0.0313417	6.71173	0.00321004	0.00105635	0.000542211	0.00261091	0.00261091	0.953824	1.52955	0.568881	0.953824
ENSMUSG00000025781	Atp5c1	0.0295789	0.269949	-0.069983	0.032166	7.83265	0.00697396	0.000340297	0.0035224	0.00215536	0.0035224	0.952649	1.52902	0.568718	0.952649
ENSMUSG00000020431	Adcy1	0.0296337	0.27029	0.166036	0.0763402	5.65701	0.0664971	0.00810799	0.0136493	0.00416563	0.0136493	1.12197	1.52821	0.56817	1.12197
ENSMUSG00000023411	Nfatc4	0.0296703	0.270352	0.0622603	0.0286325	8.19373	0.0279152	0.00059363	0.00246703	0.00216269	0.00246703	1.0441	1.52768	0.56807	1.0441
ENSMUSG00000020526	Znhit3	0.0296756	0.270352	-0.107218	0.0493096	5.29825	0.0106651	0.00381112	0.00394268	0.00526623	0.00526623	0.928376	1.5276	0.56807	0.928376
ENSMUSG00000014329	Bicc1	0.0296959	0.270378	0.170963	0.0786356	6.04189	0.0552985	0.0018052	0.0212801	0.0033862	0.0212801	1.12581	1.5273	0.568029	1.12581
ENSMUSG00000001911	Nfix	0.0297203	0.27044	0.761384	0.350255	4.0713	1.02627	0.0310956	0.426905	0.0141506	0.426905	1.69512	1.52695	0.567929	1.69512
ENSMUSG00000026187	Xrcc5	0.0297946	0.270845	-0.0628945	0.0289461	7.19926	0.00906585	0.000812383	0.00089545	0.0023157	0.0023157	0.957341	1.52586	0.567279	0.957341
ENSMUSG00000067279	Ppp1r3c	0.0298159	0.270845	0.165122	0.0760045	4.4364	0.0298875	0.01122	0.00734306	0.0103463	0.0103463	1.12126	1.52555	0.567279	1.12126
ENSMUSG00000039187	Fanci	0.0298174	0.270845	-0.103079	0.0474468	5.06166	0.0098439	0.00215815	0.00410175	0.00624633	0.00624633	0.931044	1.52553	0.567279	0.931044
ENSMUSG00000015126	Tsr3	0.0299379	0.270895	-0.0852235	0.039257	6.02482	0.00642156	0.00233878	0.00167547	0.00341471	0.00341471	0.942639	1.52378	0.5672	0.942639
ENSMUSG00000032370	Lactb	0.0299059	0.270895	-0.130529	0.0601147	5.15234	0.033385	0.00507625	0.00841519	0.00584222	0.00841519	0.913496	1.52424	0.5672	0.913496
ENSMUSG00000029088	Kcnip4	0.029922	0.270895	0.286842	0.132117	3.40538	0.124591	0.0393611	0.0104005	0.0258039	0.0258039	1.21997	1.52401	0.5672	1.21997
ENSMUSG00000000282	Mnt	0.0300276	0.270895	-0.113426	0.0522767	4.69352	0.0114123	0.00185566	0.00285086	0.00834698	0.00834698	0.92439	1.52248	0.5672	0.92439
ENSMUSG00000024426	Atat1	0.0300018	0.270895	0.0892076	0.0411083	6.15276	0.0214852	0.00200443	0.00430449	0.00321104	0.00430449	1.06379	1.52285	0.5672	1.06379
ENSMUSG00000020652	Cenpo	0.0298631	0.270895	-0.140257	0.064578	5.70957	0.0219587	0.00678822	0.00878096	0.00403778	0.00878096	0.907357	1.52487	0.5672	0.907357
ENSMUSG00000003778	Brd8	0.0299397	0.270895	-0.0677017	0.0311862	8.11369	0.00684127	0.00147595	0.00091228	0.00215501	0.00215501	0.954157	1.52375	0.5672	0.954157
ENSMUSG00000017478	Zc3h18	0.0300507	0.270895	-0.0625433	0.0288295	7.37357	0.00387801	0.000854271	0.000265924	0.00224865	0.00224865	0.957575	1.52215	0.5672	0.957575
ENSMUSG00000020181	Nav3	0.0300506	0.270895	0.396353	0.1827	4.48938	0.156149	0.0916441	0.0329714	0.00989358	0.0329714	1.31618	1.52215	0.5672	1.31618
ENSMUSG00000001017	Chtop	0.0299883	0.270895	-0.0561765	0.0258849	8.40122	0.00275547	0.000302516	0.00158101	0.00219891	0.00219891	0.96181	1.52305	0.5672	0.96181
ENSMUSG00000031467	Agpat5	0.0299057	0.270895	0.0845301	0.0389299	7.25045	0.0129478	0.00194214	0.00371587	0.00229425	0.00371587	1.06034	1.52425	0.5672	1.06034
ENSMUSG00000073565	Prr16	0.0299901	0.270895	0.233089	0.107403	4.83058	0.638612	0.00977195	0.0332938	0.00746973	0.0332938	1.17535	1.52302	0.5672	1.17535
ENSMUSG00000031673	Cdh11	0.0299728	0.270895	0.120606	0.0555671	8.8864	0.0220951	0.000416515	0.0111109	0.0023813	0.0111109	1.08719	1.52327	0.5672	1.08719
ENSMUSG00000018923	Med11	0.0301593	0.271557	-0.104013	0.0479768	5.4832	0.0101922	0.00394424	0.00404462	0.00464907	0.00464907	0.930441	1.52058	0.56614	0.930441
ENSMUSG00000029121	Crmp1	0.0301435	0.271557	-0.142963	0.0659363	5.09856	0.0217323	0.00233118	0.0138998	0.00607731	0.0138998	0.905657	1.52081	0.56614	0.905657
ENSMUSG00000041961	Znrf3	0.0302122	0.271875	0.133338	0.0615229	6.58791	0.0447032	0.00254465	0.0115862	0.00272027	0.0115862	1.09683	1.51982	0.565631	1.09683
ENSMUSG00000016344	Ppdpf	0.0302776	0.27218	-0.0899042	0.0414986	7.09341	0.00744966	0.000856051	0.00557325	0.00236482	0.00557325	0.939585	1.51888	0.565144	0.939585
ENSMUSG00000050896	Rtn4rl2	0.0302814	0.27218	0.299276	0.138145	3.40207	0.125414	0.0453661	0.0233	0.0258811	0.0258811	1.23053	1.51882	0.565144	1.23053
ENSMUSG00000029427	Zcchc8	0.030303	0.272216	0.0868069	0.0400751	6.3186	0.00593302	0.00300106	7.94297e-05	0.00299472	0.00299472	1.06202	1.51851	0.565087	1.06202
ENSMUSG00000048644	Ctxn1	0.0303541	0.272517	-0.0733179	0.0338582	7.0726	0.00495815	0.000869879	0.00340993	0.0023753	0.00340993	0.95045	1.51778	0.564607	0.95045
ENSMUSG00000052949	Rnf157	0.0303758	0.272554	0.148081	0.0683929	5.54729	0.145314	0.00416839	0.0132946	0.00446067	0.0132946	1.10809	1.51747	0.564548	1.10809
ENSMUSG00000029366	Dck	0.0304363	0.272938	-0.0608949	0.0281352	7.03433	0.00349649	0.000559938	0.00125003	0.00239534	0.00239534	0.958669	1.51661	0.563936	0.958669
ENSMUSG00000087408	Cers1	0.0304616	0.273006	0.150802	0.0696854	5.0184	0.0318828	0.0116763	-0.00496267	0.00645295	0.00645295	1.11019	1.51625	0.563827	1.11019
ENSMUSG00000001305	Rrp15	0.0305045	0.273232	-0.0789087	0.0364731	7.33347	0.00969424	0.00119512	0.00377128	0.00226251	0.00377128	0.946774	1.51564	0.563469	0.946774
ENSMUSG00000018574	Acadvl	0.0306021	0.273688	0.102627	0.0474641	5.29003	0.00907242	0.00311416	0.00417089	0.00529644	0.00529644	1.07373	1.51425	0.562744	1.07373
ENSMUSG00000022223	Sdr39u1	0.0306086	0.273688	-0.181706	0.0840402	5.34184	0.0332197	0.0109254	0.0154423	0.0051102	0.0154423	0.88166	1.51416	0.562744	0.88166
ENSMUSG00000032715	Trib3	0.0305871	0.273688	0.351475	0.162539	2.28546	0.169382	0.033226	0.064525	0.0654048	0.0654048	1.27586	1.51446	0.562744	1.27586
ENSMUSG00000097954	Gm4217	0.0306577	0.273897	0.234365	0.108428	3.76085	0.0628874	0.0252003	0.0154563	0.0186907	0.0186907	1.17639	1.51346	0.562413	1.17639
ENSMUSG00000024544	Ldlrad4	0.0306851	0.273897	0.262561	0.121492	4.25998	0.134851	0.0171609	0.0379444	0.012021	0.0379444	1.19961	1.51307	0.562413	1.19961
ENSMUSG00000044350	Lacc1	0.0306843	0.273897	0.143082	0.0662064	4.72301	0.0241827	0.00821642	0.0074686	0.00814787	0.00814787	1.10426	1.51308	0.562413	1.10426
ENSMUSG00000006517	Mvd	0.0308239	0.274977	-0.129501	0.0599727	6.40841	0.0163419	0.00162629	0.0118015	0.00289572	0.0118015	0.914147	1.51111	0.560704	0.914147
ENSMUSG00000081485	Gm12338	0.0309109	0.275594	1.70318	0.789159	3.27416	2.6644	0.932122	1.39289	0.0290269	1.39289	3.25617	1.50989	0.55973	3.25617
ENSMUSG00000038132	Rbm24	0.030933	0.275632	0.442365	0.204994	2.00072	0.230652	0.0130317	0.143853	0.0804763	0.143853	1.35883	1.50958	0.559671	1.35883
ENSMUSG00000098274	Rpl24	0.0309537	0.275657	-0.0658551	0.0305214	8.5756	0.011204	0.000160378	0.00331744	0.00224813	0.00331744	0.955379	1.50929	0.55963	0.955379
ENSMUSG00000027176	Cstf3	0.0310406	0.276272	-0.0861335	0.0399404	5.67117	0.00606494	0.0018252	0.000754564	0.00413034	0.00413034	0.942044	1.50807	0.558663	0.942044
ENSMUSG00000025854	Fam20c	0.0311308	0.276867	0.365962	0.169788	3.11543	0.378128	0.0742266	-0.0192432	0.0333985	0.0333985	1.28874	1.50681	0.557729	1.28874
ENSMUSG00000038175	Mylip	0.0311469	0.276867	0.167018	0.0774957	6.22713	0.0575372	0.00161642	0.0208044	0.00310763	0.0208044	1.12274	1.50659	0.557729	1.12274
ENSMUSG00000030075	Cntn3	0.0311612	0.276867	0.287779	0.13354	3.73307	0.178468	0.0273622	0.0392137	0.0191679	0.0392137	1.22076	1.50639	0.557729	1.22076
ENSMUSG00000027203	Dut	0.0311886	0.276951	-0.0922662	0.0428218	7.47032	0.0208657	0.000762089	0.00608373	0.00221911	0.00608373	0.938048	1.506	0.557597	0.938048
ENSMUSG00000028519	Dab1	0.0312219	0.277088	-0.278982	0.129504	3.81398	0.153688	0.033683	0.0289297	0.0178123	0.0289297	0.824173	1.50554	0.557382	0.824173
ENSMUSG00000026755	Arpc5l	0.0313342	0.277728	-0.0815531	0.0378823	6.00921	0.00982449	0.00191646	0.00120577	0.00344113	0.00344113	0.94504	1.50398	0.556381	0.94504
ENSMUSG00000074736	Syndig1	0.0313332	0.277728	0.61583	0.286058	1.33517	0.638247	0.0841215	0.221374	0.126141	0.221374	1.53244	1.50399	0.556381	1.53244
ENSMUSG00000020776	Fbf1	0.0313659	0.277728	-0.0893356	0.0415051	6.47487	0.018792	0.00360323	0.00145667	0.00282808	0.00282808	0.939956	1.50354	0.556381	0.939956
ENSMUSG00000028245	Nsmaf	0.0313535	0.277728	-0.0983841	0.0457057	5.619	0.0227449	0.00353526	0.00156571	0.00426372	0.00426372	0.934079	1.50371	0.556381	0.934079
ENSMUSG00000035754	Wdr18	0.0314293	0.27813	-0.0996757	0.0463264	5.94525	0.0125145	0.00445892	0.00156086	0.00355333	0.00355333	0.933243	1.50266	0.555752	0.933243
ENSMUSG00000022952	Runx1	0.0314792	0.278164	0.251253	0.116809	4.77872	0.279532	0.00834885	0.0425904	0.00778745	0.0425904	1.19024	1.50198	0.5557	1.19024
ENSMUSG00000027303	Ptpra	0.0315052	0.278164	0.0703949	0.0327322	6.3274	0.00422011	0.00101532	0.00174789	0.00298455	0.00298455	1.05	1.50162	0.5557	1.05
ENSMUSG00000005150	Wdr83	0.0314952	0.278164	-0.0982713	0.0456914	5.71504	0.00854136	0.00376913	0.00186523	0.00402498	0.00402498	0.934152	1.50176	0.5557	0.934152
ENSMUSG00000033031	Cip2a	0.0314667	0.278164	-0.0703897	0.0327223	6.4414	0.00811856	0.00103764	0.00295982	0.00286164	0.00295982	0.952381	1.50215	0.5557	0.952381
ENSMUSG00000031931	Ankrd49	0.0315448	0.278178	-0.13939	0.0648284	6.35054	0.0183472	0.00347322	0.0122169	0.00295835	0.0122169	0.907903	1.50107	0.555677	0.907903
ENSMUSG00000005102	Eif2ak4	0.0315841	0.278178	-0.0778627	0.0362214	6.74582	0.00534943	0.0023145	0.0020237	0.00258359	0.00258359	0.94746	1.50053	0.555677	0.94746
ENSMUSG00000055044	Pdlim1	0.0315406	0.278178	-0.155608	0.0723697	5.72609	0.0343677	0.00550941	0.0140434	0.00399933	0.0140434	0.897754	1.50113	0.555677	0.897754
ENSMUSG00000035776	Cd99l2	0.0316239	0.278178	0.106903	0.0497425	6.44079	0.0166854	0.00280486	0.0064326	0.00286226	0.0064326	1.07691	1.49998	0.555677	1.07691
ENSMUSG00000049489	Ccnq	0.0316297	0.278178	-0.110814	0.051564	5.59395	0.0139874	0.00399772	0.00592864	0.00433091	0.00592864	0.926065	1.49991	0.555677	0.926065
ENSMUSG00000030890	Ilk	0.0316328	0.278178	-0.0701156	0.0326268	6.55341	0.00439877	0.00122169	0.00218033	0.00275247	0.00275247	0.952562	1.49986	0.555677	0.952562
ENSMUSG00000072421	Gm10357	0.0316144	0.278178	0.295208	0.137354	3.51419	0.0676342	0.047048	0.00902431	0.0233853	0.0233853	1.22706	1.50011	0.555677	1.22706
ENSMUSG00000024534	Sncaip	0.0316645	0.278279	0.133169	0.0619788	6.34631	0.156667	0.00276478	0.0115763	0.00296308	0.0115763	1.0967	1.49943	0.555519	1.0967
ENSMUSG00000022828	Gtf2e1	0.0316804	0.278279	-0.0628795	0.0292678	7.13148	0.0021111	0.00085161	0.000446019	0.00234638	0.00234638	0.957351	1.49921	0.555519	0.957351
ENSMUSG00000019087	Atp6ap1	0.0317008	0.278301	0.0974059	0.0453438	5.83279	0.0110776	0.00390737	-0.000988307	0.0037686	0.0037686	1.06985	1.49893	0.555486	1.06985
ENSMUSG00000047907	Tshz2	0.0317355	0.278447	0.1756	0.081761	5.55874	0.180424	0.00351471	0.0214421	0.00442827	0.0214421	1.12943	1.49845	0.555257	1.12943
ENSMUSG00000027953	Slc50a1	0.0317908	0.278707	0.12478	0.0581174	5.37233	0.0126363	0.00760474	0.00209722	0.00500508	0.00500508	1.09034	1.4977	0.554852	1.09034
ENSMUSG00000054641	Mmrn1	0.0318012	0.278707	0.137857	0.0642119	5.47075	0.0202115	0.00417482	0.0112183	0.00468706	0.0112183	1.10027	1.49756	0.554852	1.10027
ENSMUSG00000104028	Gm5851	0.0318224	0.278734	1.15484	0.537976	1.65224	1.21652	0.507585	0.572909	0.1024	0.572909	2.22659	1.49727	0.554809	2.22659
ENSMUSG00000097906	Gm9625	0.031869	0.278827	-0.0716082	0.0333675	7.45418	0.0145956	0.000654555	0.00350209	0.00222366	0.00350209	0.951577	1.49663	0.554666	0.951577
ENSMUSG00000058064	Gm10036	0.0318645	0.278827	0.176368	0.0821805	4.40069	0.0300514	0.0145494	-0.00407025	0.0106642	0.0106642	1.13004	1.49669	0.554666	1.13004
ENSMUSG00000028005	Gucy1b1	0.0319662	0.279269	0.299356	0.139571	3.72083	0.283484	0.0236139	0.0491116	0.0193822	0.0491116	1.2306	1.49531	0.553977	1.2306
ENSMUSG00000022517	Mgrn1	0.0319738	0.279269	-0.0681299	0.0317661	6.64071	0.0048962	0.00109538	0.00153616	0.00267186	0.00267186	0.953874	1.49521	0.553977	0.953874
ENSMUSG00000053395	Cacng8	0.0319577	0.279269	0.24096	0.112339	4.52384	0.0716177	0.021968	0.0251469	0.0096109	0.0251469	1.18178	1.49542	0.553977	1.18178
ENSMUSG00000002885	Adgre5	0.0321281	0.279623	0.202022	0.0942788	5.86253	0.124954	0.00486494	0.0283188	0.00370916	0.0283188	1.15031	1.49311	0.553427	1.15031
ENSMUSG00000002985	Apoe	0.0320621	0.279623	0.118751	0.0553972	5.79883	0.0822533	0.00447753	0.00697951	0.00383892	0.00697951	1.08579	1.49401	0.553427	1.08579
ENSMUSG00000092335	Zfp977	0.0321352	0.279623	0.348788	0.162778	2.9429	0.116436	0.0601553	0.0291015	0.0387656	0.0387656	1.27349	1.49302	0.553427	1.27349
ENSMUSG00000036473	Tbc1d24	0.032141	0.279623	0.136153	0.063544	6.17165	0.0212829	0.0110957	0.00397891	0.00318365	0.00397891	1.09897	1.49294	0.553427	1.09897
ENSMUSG00000028211	Trp53inp1	0.0320364	0.279623	0.0824386	0.0384516	6.54	0.0290223	0.00110727	0.00441257	0.00276512	0.00441257	1.05881	1.49436	0.553427	1.05881
ENSMUSG00000084106	Gm6136	0.0320701	0.279623	0.166825	0.0778268	4.84093	0.0538049	0.0124034	0.0102095	0.00740828	0.0102095	1.12258	1.4939	0.553427	1.12258
ENSMUSG00000074064	Mlycd	0.032091	0.279623	0.128972	0.0601752	5.12006	0.0290321	0.00753685	-0.000790661	0.00598177	0.00598177	1.09351	1.49362	0.553427	1.09351
ENSMUSG00000055022	Cntn1	0.0323351	0.279911	0.165351	0.0772582	4.45939	0.0974799	0.0121365	0.00474899	0.0101471	0.0101471	1.12144	1.49033	0.55298	1.12144
ENSMUSG00000039405	Prss23	0.0323878	0.279911	0.12505	0.0584458	4.68374	0.0137547	0.00433848	0.00130195	0.00841427	0.00841427	1.09055	1.48962	0.55298	1.09055
ENSMUSG00000078923	Ube2v1	0.0323824	0.279911	-0.0640585	0.0299387	7.23174	0.00905425	0.00089812	0.00244815	0.00230193	0.00244815	0.956569	1.48969	0.55298	0.956569
ENSMUSG00000025262	Fam120c	0.032245	0.279911	0.11094	0.0518081	5.3723	0.0195212	0.00501542	0.00132087	0.00500516	0.00500516	1.07993	1.49154	0.55298	1.07993
ENSMUSG00000032440	Tgfbr2	0.0323915	0.279911	0.119365	0.05579	6.71699	0.0264032	0.00198802	0.00963206	0.00260662	0.00963206	1.08626	1.48957	0.55298	1.08626
ENSMUSG00000021958	Pinx1	0.0322763	0.279911	-0.133719	0.062457	5.9142	0.017899	0.00255686	0.0120064	0.00361028	0.0120064	0.911479	1.49112	0.55298	0.911479
ENSMUSG00000024873	Cnih2	0.0323338	0.279911	0.137686	0.0643312	5.55539	0.0467243	0.00340591	0.0120445	0.00443771	0.0120445	1.10014	1.49034	0.55298	1.10014
ENSMUSG00000030105	Arl8b	0.0323825	0.279911	0.0819624	0.0383063	7.41916	0.00919112	0.00324416	0.00123171	0.00223405	0.00223405	1.05846	1.48969	0.55298	1.05846
ENSMUSG00000038145	Snrk	0.0323245	0.279911	0.114382	0.0534402	5.16671	0.0123741	0.00488025	0.00499874	0.00578161	0.00578161	1.08251	1.49047	0.55298	1.08251
ENSMUSG00000028568	Btf3l4	0.0322698	0.279911	-0.0790103	0.0369025	6.72545	0.01049	0.00190673	0.00317732	0.00259976	0.00317732	0.946707	1.4912	0.55298	0.946707
ENSMUSG00000050796	B3galt6	0.0323007	0.279911	0.151683	0.0708578	5.4539	0.0242781	0.00448831	0.0142561	0.00473931	0.0142561	1.11086	1.49079	0.55298	1.11086
ENSMUSG00000042804	Gpr153	0.0323369	0.279911	0.114043	0.0532858	5.89738	0.034334	0.00297385	0.00762647	0.00364189	0.00762647	1.08226	1.4903	0.55298	1.08226
ENSMUSG00000071659	Hnrnpul2	0.0324157	0.279964	-0.0579393	0.027084	8.61309	0.00413435	0.00014806	0.0025905	0.00226103	0.0025905	0.960635	1.48924	0.552898	0.960635
ENSMUSG00000031562	Dctd	0.032467	0.280223	-0.0869957	0.0406785	6.17408	0.0109188	0.00299752	0.00315601	0.00318019	0.00318019	0.941481	1.48856	0.552497	0.941481
ENSMUSG00000031976	Urb2	0.0324819	0.280223	-0.0766555	0.0358466	6.85399	0.00749973	0.00110472	0.00369255	0.00250455	0.00369255	0.948253	1.48836	0.552497	0.948253
ENSMUSG00000006589	Aprt	0.0325185	0.280225	-0.0800354	0.0374351	6.57321	0.0113361	0.000848785	0.00438306	0.00273393	0.00438306	0.946034	1.48787	0.552493	0.946034
ENSMUSG00000019256	Ahr	0.0325132	0.280225	0.188606	0.0882141	3.62831	0.060495	0.00796914	0.00509353	0.0210826	0.0210826	1.13966	1.48794	0.552493	1.13966
ENSMUSG00000031004	Mki67	0.0325378	0.280235	-0.112	0.052392	8.83329	0.0122263	8.85113e-05	0.0101592	0.0023542	0.0101592	0.925304	1.48761	0.552477	0.925304
ENSMUSG00000070526	Peg12	0.0325715	0.280369	-0.0723374	0.0338448	6.5363	0.0191873	0.00150779	0.00173381	0.00276863	0.00276863	0.951096	1.48716	0.55227	0.951096
ENSMUSG00000032640	Chsy1	0.0326058	0.280508	0.0650291	0.0304315	7.61003	0.00684574	0.000495963	0.00296138	0.00218591	0.00296138	1.04611	1.4867	0.552054	1.04611
ENSMUSG00000030103	Bhlhe40	0.0326728	0.280781	0.372382	0.174329	3.45182	0.435215	0.0887146	-0.0163269	0.0247443	0.0247443	1.29449	1.48581	0.551632	1.29449
ENSMUSG00000107951	Gm6210	0.0326739	0.280781	0.222986	0.104391	3.90147	0.0304561	0.0242235	-0.00512155	0.0164603	0.0164603	1.16715	1.4858	0.551632	1.16715
ENSMUSG00000071856	Mcc	0.0327037	0.280789	0.124726	0.0584003	5.52362	0.0181648	0.00306356	0.00966934	0.00452882	0.00966934	1.0903	1.4854	0.55162	1.0903
ENSMUSG00000049107	Ntf3	0.0327112	0.280789	0.129177	0.0604871	5.41426	0.0727787	0.00466548	0.00899362	0.00486572	0.00899362	1.09367	1.4853	0.55162	1.09367
ENSMUSG00000026748	Plxdc2	0.0327317	0.280809	0.0990397	0.0463808	5.66619	0.0463533	0.00342621	0.00460486	0.00414269	0.00460486	1.07106	1.48503	0.551588	1.07106
ENSMUSG00000038822	Hace1	0.032817	0.281385	-0.0967836	0.0453464	5.75232	0.0154665	0.00373699	0.00140303	0.00393987	0.00393987	0.935115	1.4839	0.550699	0.935115
ENSMUSG00000047963	Stbd1	0.0328548	0.281396	-0.262728	0.123124	4.45374	0.100473	0.0114931	0.0451023	0.0101957	0.0451023	0.83351	1.4834	0.550681	0.83351
ENSMUSG00000031207	Msn	0.0328448	0.281396	-0.0590084	0.0276519	7.03586	0.00977936	0.000460081	0.000883514	0.00239452	0.00239452	0.959924	1.48353	0.550681	0.959924
ENSMUSG00000025268	Maged2	0.0329668	0.281887	0.0790856	0.0370861	7.90606	0.0162526	0.000469815	0.00466492	0.00215118	0.00466492	1.05635	1.48192	0.549925	1.05635
ENSMUSG00000060671	Atp8b2	0.0329598	0.281887	0.123873	0.0580863	5.3408	0.0108452	0.00748251	-0.0016052	0.00511382	0.00511382	1.08966	1.48202	0.549925	1.08966
ENSMUSG00000042439	Zfp532	0.0329417	0.281887	0.08308	0.0389536	5.95753	0.00871311	0.00213364	0.000315863	0.00353127	0.00353127	1.05928	1.48225	0.549925	1.05928
ENSMUSG00000056268	Dennd1b	0.0330287	0.28226	0.121265	0.0568856	5.65932	0.0743433	0.00792113	-0.0011993	0.00415983	0.00415983	1.08769	1.48111	0.54935	1.08769
ENSMUSG00000022982	Sod1	0.0330871	0.282447	-0.0650844	0.0305414	9.7227	0.0182379	0.000309908	0.00317245	0.00309405	0.00317245	0.955889	1.48034	0.549063	0.955889
ENSMUSG00000036199	Ndufa13	0.0330809	0.282447	-0.082705	0.0388086	6.47083	0.0136333	0.00151017	0.00411262	0.00283209	0.00411262	0.944286	1.48042	0.549063	0.944286
ENSMUSG00000071654	Uqcc3	0.03316	0.282822	-0.0993979	0.0466626	5.58123	0.0153324	0.00376327	0.00198202	0.00436568	0.00436568	0.933422	1.47939	0.548487	0.933422
ENSMUSG00000064061	Dzip3	0.0331829	0.282822	-0.065743	0.0308672	7.50998	0.00406034	0.00134851	-5.38963e-05	0.00220856	0.00220856	0.955453	1.47909	0.548487	0.955453
ENSMUSG00000000711	Rab5b	0.0331859	0.282822	0.062863	0.0295155	7.20474	0.00458065	0.000543504	0.00270885	0.00231334	0.00270885	1.04454	1.47905	0.548487	1.04454
ENSMUSG00000037503	Fam168b	0.0332657	0.283189	0.0561319	0.0263671	7.07099	0.00227732	0.000219377	0.00106774	0.00237613	0.00237613	1.03967	1.478	0.547924	1.03967
ENSMUSG00000022443	Myh9	0.0332609	0.283189	-0.0901936	0.0423659	6.83104	0.0109205	0.00035016	0.00635068	0.0025204	0.00635068	0.939397	1.47807	0.547924	0.939397
ENSMUSG00000040269	Mrps28	0.0333295	0.283429	-0.110171	0.05177	5.32771	0.0283741	0.0048458	0.00226859	0.00516003	0.00516003	0.926478	1.47717	0.547556	0.926478
ENSMUSG00000029245	Epha5	0.0333489	0.283429	0.450481	0.211706	3.34601	0.286289	0.0386735	0.128653	0.0272197	0.128653	1.3665	1.47692	0.547556	1.3665
ENSMUSG00000025374	Nabp2	0.0333463	0.283429	-0.117928	0.0554203	6.24872	0.031942	0.00239255	0.00907407	0.00307968	0.00907407	0.92151	1.47695	0.547556	0.92151
ENSMUSG00000030499	Kctd15	0.0333928	0.283646	-0.144257	0.0678116	6.78932	0.0200435	0.0146169	-0.00194541	0.00255045	0.00255045	0.904845	1.47635	0.547223	0.904845
ENSMUSG00000069633	Pex11g	0.0334215	0.283734	-0.322185	0.151475	3.0657	0.0998524	0.0360034	0.0496567	0.0348789	0.0496567	0.799858	1.47597	0.547089	0.799858
ENSMUSG00000032116	Stt3a	0.0334974	0.284222	0.10325	0.0485637	6.74222	0.00956889	0.00621841	0.000777926	0.00258642	0.00258642	1.07419	1.47499	0.546342	1.07419
ENSMUSG00000031221	Igbp1	0.0335549	0.28447	-0.0623558	0.0293387	7.70734	0.00580551	0.00102718	0.00218632	0.00216923	0.00218632	0.957699	1.47424	0.545963	0.957699
ENSMUSG00000027412	Lpin3	0.0335635	0.28447	0.430078	0.202363	3.9332	0.182173	0.0883479	0.0645355	0.0159981	0.0645355	1.34731	1.47413	0.545963	1.34731
ENSMUSG00000046613	Vwa5b2	0.0336249	0.284678	0.568106	0.267402	1.8347	0.641372	0.115616	0.151331	0.0904134	0.151331	1.48258	1.47334	0.545646	1.48258
ENSMUSG00000027952	Pmvk	0.033613	0.284678	-0.105772	0.0497824	5.7607	0.0117796	0.00289119	0.00636108	0.00392127	0.00636108	0.929308	1.47349	0.545646	0.929308
ENSMUSG00000040502	Marchf9	0.0337117	0.28515	0.115331	0.0543118	5.50855	0.0349502	0.00418414	0.00682835	0.0045731	0.00682835	1.08322	1.47222	0.544927	1.08322
ENSMUSG00000053950	Adnp2	0.0337175	0.28515	-0.0622724	0.0293263	7.11336	0.00186654	0.000855738	0.000216645	0.00235504	0.00235504	0.957754	1.47214	0.544927	0.957754
ENSMUSG00000022100	Xpo7	0.0339493	0.286036	-0.054552	0.0257239	7.99839	0.00443753	0.000320388	0.000522579	0.00215003	0.00215003	0.962893	1.46917	0.543579	0.962893
ENSMUSG00000020790	Ankfy1	0.0339519	0.286036	0.0706854	0.0333321	6.84075	0.00632655	0.00131393	0.0028339	0.00251364	0.0028339	1.05022	1.46914	0.543579	1.05022
ENSMUSG00000029596	Sdsl	0.0339357	0.286036	0.302357	0.142565	3.5086	0.0803557	0.0523749	0.0104891	0.0235042	0.0235042	1.23316	1.46934	0.543579	1.23316
ENSMUSG00000033726	Emx1	0.0338719	0.286036	-0.409233	0.192889	2.62432	0.182244	0.085539	0.0533644	0.0503751	0.0533644	0.753024	1.47016	0.543579	0.753024
ENSMUSG00000020476	Dbnl	0.033883	0.286036	-0.0854864	0.040296	7.47101	0.00873863	0.000621778	0.00544029	0.00221892	0.00544029	0.942467	1.47002	0.543579	0.942467
ENSMUSG00000057649	Brd9	0.0339186	0.286036	0.0712842	0.0336081	6.90997	0.00561686	0.00174898	0.000913816	0.00246784	0.00246784	1.05065	1.46956	0.543579	1.05065
ENSMUSG00000023994	Nfya	0.0338556	0.286036	0.067836	0.0319712	6.51533	0.00738839	0.000920642	0.00289541	0.00278865	0.00289541	1.04814	1.47037	0.543579	1.04814
ENSMUSG00000039067	Psmd7	0.033989	0.286037	-0.054848	0.0258693	7.69597	0.0047105	0.00032751	0.00202561	0.00217091	0.00217091	0.962696	1.46866	0.543577	0.962696
ENSMUSG00000020224	Llph	0.0339873	0.286037	-0.0823451	0.038838	6.66675	0.0110779	0.00249261	0.0031387	0.00264885	0.0031387	0.944521	1.46868	0.543577	0.944521
ENSMUSG00000022706	Mrpl40	0.0340252	0.286098	-0.0942326	0.0444541	5.67494	0.0113019	0.00325663	0.00298361	0.00412106	0.00412106	0.93677	1.4682	0.543485	0.93677
ENSMUSG00000030518	Fam189a1	0.0340333	0.286098	0.563254	0.265726	1.47844	0.258922	0.148679	0.0212086	0.114933	0.114933	1.4776	1.4681	0.543485	1.4776
ENSMUSG00000018906	P4ha2	0.0341095	0.286583	0.141586	0.0668243	5.2476	0.0473263	0.00721655	0.00945461	0.00545651	0.00945461	1.10312	1.46712	0.542749	1.10312
ENSMUSG00000021650	Ptcd2	0.0341975	0.287166	-0.0805818	0.0380509	6.20702	0.00668735	0.00227095	0.00154702	0.00313445	0.00313445	0.945676	1.46601	0.541867	0.945676
ENSMUSG00000069171	Nr2f1	0.0342184	0.287185	-0.168738	0.0796878	6.71378	0.124076	0.00117868	0.0225285	0.00260923	0.0225285	0.889621	1.46574	0.541838	0.889621
ENSMUSG00000022762	Ncam2	0.0342412	0.287221	0.588631	0.278021	3.14146	0.395578	0.0471798	0.24139	0.0326452	0.24139	1.50382	1.46545	0.541784	1.50382
ENSMUSG00000035407	Kank4	0.0343008	0.287564	-0.103652	0.0489729	6.5367	0.117277	0.000972314	0.0079815	0.00276825	0.0079815	0.930674	1.4647	0.541265	0.930674
ENSMUSG00000032047	Acat1	0.0343825	0.287695	0.139842	0.0661018	4.4343	0.023211	0.00594793	0.00291411	0.0103647	0.0103647	1.10178	1.46366	0.541068	1.10178
ENSMUSG00000000560	Gabra2	0.0344467	0.287695	0.486077	0.229845	1.96612	0.250146	0.114753	0.0672958	0.0824744	0.0824744	1.40063	1.46285	0.541068	1.40063
ENSMUSG00000029823	Luc7l2	0.0343972	0.287695	0.0540009	0.0255277	8.40327	0.0025672	0.000233485	0.00166365	0.00219939	0.00219939	1.03814	1.46348	0.541068	1.03814
ENSMUSG00000037108	Zcwpw1	0.034418	0.287695	0.218071	0.1031	4.54294	0.102354	0.00925707	0.0304268	0.00945812	0.0304268	1.16318	1.46321	0.541068	1.16318
ENSMUSG00000027602	Map1lc3a	0.0343698	0.287695	0.116752	0.0551837	5.8301	0.0134351	0.00224242	0.00912646	0.00377407	0.00912646	1.08429	1.46382	0.541068	1.08429
ENSMUSG00000027416	Otor	0.0344342	0.287695	0.377565	0.178522	3.4421	0.330887	0.0323053	0.0866765	0.0249626	0.0866765	1.29915	1.46301	0.541068	1.29915
ENSMUSG00000046139	Patl1	0.0344127	0.287695	0.0612102	0.0289382	7.14767	0.00196593	0.000787572	0.000428068	0.0023388	0.0023388	1.04334	1.46328	0.541068	1.04334
ENSMUSG00000038335	Tsr1	0.0344699	0.287734	-0.0901007	0.0426102	6.41576	0.00832336	0.000913104	0.00586526	0.00288803	0.00586526	0.939457	1.46256	0.54101	0.939457
ENSMUSG00000010064	Slc38a3	0.0345303	0.288035	0.325839	0.154147	2.64662	0.121038	0.0392216	0.0399504	0.049487	0.049487	1.25339	1.4618	0.540555	1.25339
ENSMUSG00000034437	Gm9761	0.0345667	0.288035	0.562472	0.266146	2.70651	0.314568	0.176887	0.0875587	0.0471601	0.0875587	1.4768	1.46134	0.540555	1.4768
ENSMUSG00000040414	Slc25a28	0.0346136	0.288035	-0.101603	0.0480881	5.55156	0.015409	0.00418465	0.00140329	0.00444855	0.00444855	0.931997	1.46075	0.540555	0.931997
ENSMUSG00000021071	Trim9	0.0346286	0.288035	0.471003	0.222942	3.01998	0.403616	0.12949	0.0560681	0.0362873	0.0560681	1.38607	1.46057	0.540555	1.38607
ENSMUSG00000036523	Greb1	0.0346083	0.288035	-0.218482	0.103403	4.94173	0.0640922	0.0109994	0.0289183	0.00684366	0.0289183	0.859469	1.46082	0.540555	0.859469
ENSMUSG00000029623	Pdap1	0.0346365	0.288035	-0.0611063	0.0289249	7.60513	0.00895126	0.000526124	0.00259737	0.00218689	0.00259737	0.958529	1.46047	0.540555	0.958529
ENSMUSG00000069565	Dazap1	0.0346026	0.288035	-0.0605423	0.0286526	7.81101	0.00871112	0.000907805	0.00103027	0.00215715	0.00215715	0.958904	1.46089	0.540555	0.958904
ENSMUSG00000021948	Prkcd	0.0347384	0.288596	0.0797926	0.0377914	6.65252	0.00702791	0.00267059	0.00212344	0.00266133	0.00266133	1.05687	1.45919	0.539709	1.05687
ENSMUSG00000094950	Vmn2r66	0.0347788	0.288596	-0.0963838	0.0456595	5.64525	0.00769837	0.00358775	0.00263691	0.00419547	0.00419547	0.935375	1.45869	0.539709	0.935375
ENSMUSG00000024817	Uhrf2	0.0347572	0.288596	0.0651757	0.0308717	7.07917	0.00392423	0.00118614	0.00149345	0.00237196	0.00237196	1.04621	1.45896	0.539709	1.04621
ENSMUSG00000033478	Fam160b1	0.0347648	0.288596	0.0632529	0.0299622	6.98127	0.00364039	0.000926715	0.000956071	0.00242483	0.00242483	1.04482	1.45886	0.539709	1.04482
ENSMUSG00000040569	Slc26a7	0.0348313	0.288855	0.476186	0.225647	1.59361	0.169548	0.083586	0.0238921	0.106502	0.106502	1.39106	1.45803	0.539321	1.39106
ENSMUSG00000068882	Ssb	0.0348473	0.288855	-0.0567427	0.0268906	8.45349	0.00560294	0.00048776	0.00198907	0.00221183	0.00221183	0.961432	1.45783	0.539321	0.961432
ENSMUSG00000019432	Ddx39b	0.0348787	0.28896	-0.0571572	0.0270918	9.27215	0.00252962	0.000102289	0.00063247	0.00263784	0.00263784	0.961156	1.45744	0.539162	0.961156
ENSMUSG00000027519	Rab22a	0.0350109	0.289311	0.0887922	0.0421169	7.50529	0.0135558	0.00441255	0.00216007	0.00220976	0.00220976	1.06348	1.4558	0.538634	1.06348
ENSMUSG00000050069	Grem2	0.0351081	0.289311	0.366258	0.17382	3.96689	1.08039	0.0297189	0.0830781	0.0155231	0.0830781	1.28901	1.45459	0.538634	1.28901
ENSMUSG00000021556	Golm1	0.0351296	0.289311	-0.0994526	0.0472042	7.0451	0.0178246	0.00272737	0.00559137	0.0023896	0.00559137	0.933387	1.45433	0.538634	0.933387
ENSMUSG00000038331	Satb2	0.0350973	0.289311	0.116403	0.0552395	7.18563	0.318953	0.00441016	0.00698174	0.00232166	0.00698174	1.08403	1.45473	0.538634	1.08403
ENSMUSG00000029466	Anapc7	0.0351633	0.289311	-0.0709958	0.0337036	7.00955	0.00462736	0.00183197	0.0011961	0.00240885	0.00240885	0.951981	1.45391	0.538634	0.951981
ENSMUSG00000062312	Erbb2	0.0350724	0.289311	0.0997359	0.0473238	7.35004	0.013978	0.001113	0.00724795	0.00225667	0.00724795	1.07158	1.45503	0.538634	1.07158
ENSMUSG00000026482	Rgl1	0.0349786	0.289311	-0.0830857	0.0394032	6.15565	0.0331854	0.00207417	0.00372224	0.00320679	0.00372224	0.944036	1.4562	0.538634	0.944036
ENSMUSG00000024383	Map3k2	0.035091	0.289311	0.0917697	0.0435483	5.3451	0.00801576	0.00198132	0.00314288	0.00509879	0.00509879	1.06568	1.4548	0.538634	1.06568
ENSMUSG00000035279	Ssc5d	0.0351645	0.289311	0.252298	0.119773	4.18623	0.0959645	0.0203857	0.0331715	0.0128034	0.0331715	1.1911	1.4539	0.538634	1.1911
ENSMUSG00000057858	Fam204a	0.0351596	0.289311	-0.0881063	0.0418256	6.11388	0.0109154	0.00326094	0.00195845	0.00327008	0.00327008	0.940757	1.45396	0.538634	0.940757
ENSMUSG00000022827	Rabl3	0.0350599	0.289311	-0.0959651	0.0455314	6.0392	0.0275204	0.00268254	0.00505707	0.00339066	0.00505707	0.935646	1.45519	0.538634	0.935646
ENSMUSG00000021613	Hapln1	0.0350787	0.289311	-0.216181	0.102579	5.57766	0.165047	0.00269527	0.0365889	0.00437552	0.0365889	0.860841	1.45496	0.538634	0.860841
ENSMUSG00000056629	Fkbp2	0.0349485	0.289311	-0.091799	0.0435282	5.9587	0.00649968	0.00354439	0.00174037	0.00352918	0.00352918	0.938352	1.45657	0.538634	0.938352
ENSMUSG00000030876	Mettl9	0.035245	0.289703	-0.0547256	0.0259914	7.66064	0.00397813	0.000345474	0.000987076	0.00217658	0.00217658	0.962778	1.4529	0.538047	0.962778
ENSMUSG00000038383	Pigu	0.0352496	0.289703	0.078729	0.0373924	6.16961	0.00689314	0.00203336	0.00145953	0.00318657	0.00318657	1.05609	1.45285	0.538047	1.05609
ENSMUSG00000040258	Nxph4	0.0353695	0.290534	0.476219	0.226329	2.76846	1.00065	0.125769	0.0654697	0.0448406	0.0654697	1.39109	1.45137	0.536804	1.39109
ENSMUSG00000028072	Ntrk1	0.0354229	0.290818	0.465763	0.221424	2.45353	0.182534	0.12546	0.0177827	0.0575804	0.0575804	1.38105	1.45072	0.536379	1.38105
ENSMUSG00000030978	Rrm1	0.0355085	0.291302	-0.0588698	0.0279997	7.17289	0.0088554	0.000599558	0.00224876	0.00232732	0.00232732	0.960016	1.44967	0.535657	0.960016
ENSMUSG00000028926	Cdk14	0.0355195	0.291302	0.0738428	0.0351233	6.52282	0.0154901	0.00177754	0.00282808	0.00278147	0.00282808	1.05252	1.44953	0.535657	1.05252
ENSMUSG00000035597	Prpf39	0.035552	0.291413	0.0626949	0.0298261	7.09876	0.00638291	0.000958984	0.000207705	0.00236217	0.00236217	1.04441	1.44914	0.535491	1.04441
ENSMUSG00000030020	Prickle2	0.0356814	0.292319	0.119078	0.0566895	6.16279	0.0243472	0.0023324	0.00966539	0.00319639	0.00966539	1.08604	1.44756	0.534143	1.08604
ENSMUSG00000064341	mt-Nd1	0.0357883	0.292728	-0.0970272	0.0462183	10.0735	0.00939412	4.16129e-05	0.00793328	0.00359829	0.00793328	0.934958	1.44626	0.533536	0.934958
ENSMUSG00000045667	Smtnl2	0.0358071	0.292728	0.176657	0.0841581	4.63127	0.0428332	0.0176549	-0.00454142	0.00878676	0.00878676	1.13026	1.44603	0.533536	1.13026
ENSMUSG00000048387	Osr1	0.0357524	0.292728	0.354724	0.168938	5.526	1.68781	0.00517068	0.101379	0.0045219	0.101379	1.27874	1.44669	0.533536	1.27874
ENSMUSG00000076441	Ass1	0.0357937	0.292728	-0.274545	0.130782	2.91418	0.100782	0.0241338	0.00688759	0.0397207	0.0397207	0.826711	1.44619	0.533536	0.826711
ENSMUSG00000009828	Cilk1	0.0358589	0.292996	-0.0663214	0.0316039	6.90584	0.00354584	0.00125841	0.00142819	0.00247046	0.00247046	0.95507	1.4454	0.533138	0.95507
ENSMUSG00000074129	Rpl13a	0.0358877	0.293076	-0.061008	0.0290764	9.40113	0.0130515	0.000193827	0.00296247	0.00274946	0.00296247	0.958594	1.44505	0.533019	0.958594
ENSMUSG00000026209	Dnpep	0.0359793	0.293547	-0.0879808	0.0419524	6.32996	0.00937813	0.00358905	0.0010041	0.00298162	0.00298162	0.940839	1.44395	0.532323	0.940839
ENSMUSG00000006586	Runx1t1	0.0359833	0.293547	0.100541	0.0479426	6.83355	0.0135407	0.00180486	0.00677618	0.00251864	0.00677618	1.07218	1.4439	0.532323	1.07218
ENSMUSG00000042225	Ammecr1	0.0360108	0.293591	-0.0643187	0.0306746	6.89211	0.00759916	0.00103355	0.00167863	0.00247926	0.00247926	0.956397	1.44357	0.532257	0.956397
ENSMUSG00000064264	Zfp428	0.0360267	0.293591	-0.0784036	0.0373951	6.2164	0.0163194	0.00209883	0.00244628	0.00312184	0.00312184	0.947105	1.44338	0.532257	0.947105
ENSMUSG00000027438	Napb	0.0360894	0.293685	0.13448	0.0641627	4.81422	0.0312972	0.00780151	0.00712947	0.0075681	0.0075681	1.0977	1.44262	0.532118	1.0977
ENSMUSG00000020251	Glt8d2	0.0361038	0.293685	0.28521	0.136089	3.00676	0.158909	0.0324393	0.0112553	0.0367033	0.0367033	1.21859	1.44245	0.532118	1.21859
ENSMUSG00000020123	Avpr1a	0.0361143	0.293685	0.667731	0.318629	1.64375	0.80174	0.276038	0.0593093	0.102986	0.102986	1.58857	1.44232	0.532118	1.58857
ENSMUSG00000031691	Tnpo2	0.0361123	0.293685	0.0642005	0.030635	7.62307	0.00280569	0.00132037	0.000497762	0.00218337	0.00218337	1.04551	1.44235	0.532118	1.04551
ENSMUSG00000051256	Jagn1	0.0361847	0.294103	-0.0848891	0.0405228	5.97943	0.00909053	0.00250769	0.00362282	0.00349256	0.00362282	0.942857	1.44147	0.5315	0.942857
ENSMUSG00000033429	Mcee	0.0362092	0.294148	-0.190593	0.0909937	4.17695	0.0355803	0.0155326	0.0153788	0.0129062	0.0153788	0.876246	1.44118	0.531435	0.876246
ENSMUSG00000022748	Cmss1	0.0362636	0.294435	-0.102467	0.0489344	5.21103	0.0166927	0.00333961	0.00424827	0.00560013	0.00560013	0.931439	1.44053	0.531011	0.931439
ENSMUSG00000072082	Ccnf	0.0363319	0.29481	-0.0885553	0.0423063	6.01467	0.0130323	0.00325016	-7.01578e-05	0.00343185	0.00343185	0.940464	1.43971	0.530457	0.940464
ENSMUSG00000090698	Apold1	0.0363862	0.29481	0.165032	0.0788651	5.18174	0.199582	0.00594448	0.0172757	0.00571912	0.0172757	1.12119	1.43906	0.530457	1.12119
ENSMUSG00000043099	Hic1	0.0363849	0.29481	0.650196	0.310712	5.03609	0.568191	0.0109467	0.349477	0.00636732	0.349477	1.56938	1.43908	0.530457	1.56938
ENSMUSG00000031647	Mfap3l	0.0363576	0.29481	0.243565	0.116376	3.67261	0.0519678	0.0303119	-0.00240532	0.0202503	0.0202503	1.18391	1.4394	0.530457	1.18391
ENSMUSG00000001025	S100a6	0.0364094	0.294844	-0.271543	0.12978	3.55028	0.20936	0.0402484	0.0115551	0.0226318	0.0226318	0.828433	1.43879	0.530408	0.828433
ENSMUSG00000024427	Spry4	0.0364648	0.295138	-0.117758	0.0562974	6.31082	0.167796	0.00208297	0.00974945	0.0030038	0.00974945	0.921619	1.43813	0.529975	0.921619
ENSMUSG00000034795	Ccdc122	0.0365354	0.295223	0.24011	0.114835	3.52063	0.0660127	0.0259827	0.0165858	0.023249	0.023249	1.18108	1.43729	0.52985	1.18108
ENSMUSG00000056899	Immp2l	0.0364959	0.295223	0.490254	0.234419	3.29713	0.166422	0.176717	-0.0601915	0.0284378	0.0284378	1.40469	1.43776	0.52985	1.40469
ENSMUSG00000061315	Naca	0.0365709	0.295223	-0.0833931	0.039891	10.9912	0.00907939	9.57647e-05	0.00354701	0.00584507	0.00584507	0.943835	1.43686	0.52985	0.943835
ENSMUSG00000026427	Eif2d	0.0365273	0.295223	-0.0672875	0.0321794	6.97644	0.00685088	0.00143831	0.00162244	0.00242762	0.00242762	0.954431	1.43738	0.52985	0.954431
ENSMUSG00000027177	Hipk3	0.0365702	0.295223	0.0641336	0.0306782	6.95305	0.0111933	0.000581499	0.00293213	0.00244137	0.00293213	1.04546	1.43687	0.52985	1.04546
ENSMUSG00000015396	Cd83	0.0366811	0.295958	0.34961	0.167334	3.05326	0.342667	0.0692783	0.0264767	0.0352576	0.0352576	1.27422	1.43556	0.528769	1.27422
ENSMUSG00000025287	Acot9	0.0367388	0.296172	0.124265	0.0594952	4.92564	0.0157169	0.00628497	0.00465235	0.00692981	0.00692981	1.08995	1.43487	0.528456	1.08995
ENSMUSG00000062963	Ufc1	0.0368638	0.296172	-0.0895422	0.0428992	6.66384	0.013467	0.00117231	0.00569831	0.00265139	0.00569831	0.939821	1.4334	0.528456	0.939821
ENSMUSG00000019338	Zfp687	0.0369899	0.296172	-0.0879886	0.042183	7.49569	0.0165411	0.00241179	0.00423134	0.00221226	0.00423134	0.940834	1.43192	0.528456	0.940834
ENSMUSG00000030306	Tmtc1	0.0369623	0.296172	0.233278	0.111821	4.81161	0.0899355	0.00806729	0.0386139	0.00758397	0.0386139	1.1755	1.43224	0.528456	1.1755
ENSMUSG00000067873	Htatsf1	0.0369555	0.296172	0.0591077	0.028332	7.69818	0.00454852	0.000590876	0.00240587	0.00217057	0.00240587	1.04182	1.43232	0.528456	1.04182
ENSMUSG00000029467	Atp2a2	0.0369352	0.296172	-0.0636643	0.0305128	8.65365	0.00814895	0.000213433	0.00326242	0.00227594	0.00326242	0.956831	1.43256	0.528456	0.956831
ENSMUSG00000025047	Pdcd11	0.0369085	0.296172	-0.0607807	0.0291266	6.72467	0.00412886	0.00048739	0.00267982	0.0026004	0.00267982	0.958745	1.43287	0.528456	0.958745
ENSMUSG00000102758	Naaladl2	0.0369767	0.296172	0.521725	0.250105	1.66403	0.213979	0.13194	-0.0060116	0.10159	0.10159	1.43567	1.43207	0.528456	1.43567
ENSMUSG00000029014	Dnajc2	0.0369673	0.296172	-0.0679258	0.0325608	7.50573	0.00607656	0.000965466	0.00299262	0.00220965	0.00299262	0.954009	1.43218	0.528456	0.954009
ENSMUSG00000044906	4930503L19Rik	0.0368246	0.296172	-0.0796719	0.0381625	6.24943	0.00860331	0.00235835	0.000958953	0.00307878	0.00307878	0.946273	1.43386	0.528456	0.946273
ENSMUSG00000036291	Ap5m1	0.0369213	0.296172	0.103591	0.0496452	5.89589	0.0102723	0.00466676	0.00453459	0.00364472	0.00453459	1.07444	1.43272	0.528456	1.07444
ENSMUSG00000037851	Iars	0.0369951	0.296172	-0.0869236	0.0416737	6.18708	0.011449	0.00111589	0.00536777	0.00316186	0.00536777	0.941528	1.43186	0.528456	0.941528
ENSMUSG00000021051	Ppp2r5e	0.0367509	0.296172	0.081501	0.0390233	6.67528	0.00797674	0.00120566	0.00447953	0.00264149	0.00447953	1.05812	1.43473	0.528456	1.05812
ENSMUSG00000044345	Marveld1	0.0368038	0.296172	0.140496	0.0672896	7.02938	0.0379573	0.00105226	0.0158519	0.002398	0.0158519	1.10228	1.43411	0.528456	1.10228
ENSMUSG00000074637	Sox2	0.036967	0.296172	-0.133965	0.0642169	6.2333	0.37619	0.00259931	0.0127962	0.00309955	0.0127962	0.911324	1.43219	0.528456	0.911324
ENSMUSG00000040829	Zmynd15	0.0370362	0.296193	0.675148	0.323755	2.13239	0.348593	0.318109	-0.0543684	0.0732104	0.0732104	1.59676	1.43137	0.528425	1.59676
ENSMUSG00000055538	Zcchc24	0.0370182	0.296193	0.112914	0.0541407	7.41694	0.0217617	0.000775776	0.0101674	0.00223473	0.0101674	1.08141	1.43158	0.528425	1.08141
ENSMUSG00000019890	Nts	0.0371052	0.296592	0.375835	0.180291	2.80291	0.236517	0.077763	0.0229468	0.0435883	0.0435883	1.29759	1.43057	0.52784	1.29759
ENSMUSG00000030816	Rnf40	0.037164	0.296909	0.0768908	0.0368965	7.24199	0.00599364	0.00278469	5.55591e-05	0.0022977	0.0022977	1.05474	1.42988	0.527377	1.05474
ENSMUSG00000021253	Tgfb3	0.0373056	0.297886	0.136385	0.065494	5.92435	0.0344629	0.00278907	0.0132249	0.00359148	0.0132249	1.09915	1.42823	0.52595	1.09915
ENSMUSG00000054871	Tmem158	0.0374073	0.298543	0.194984	0.0936841	4.29864	0.100467	0.0157291	0.0170373	0.0116311	0.0170373	1.14471	1.42704	0.524993	1.14471
ENSMUSG00000001052	Sec24b	0.0374639	0.298841	0.0816017	0.0392189	5.91629	0.00466768	0.00213592	-0.0010238	0.0036064	0.0036064	1.05819	1.42639	0.52456	1.05819
ENSMUSG00000022325	Pop1	0.0375371	0.299116	-0.170193	0.0818284	4.04084	0.0206804	0.0104621	0.00313248	0.0145359	0.0145359	0.888724	1.42554	0.524161	0.888724
ENSMUSG00000054676	1600014C10Rik	0.0375241	0.299116	0.121671	0.0584952	5.50484	0.0198258	0.00819022	0.00249909	0.00458408	0.00458408	1.08799	1.42569	0.524161	1.08799
ENSMUSG00000034845	Plvap	0.0376393	0.299404	0.0701418	0.0337421	6.52055	0.00604108	0.00146687	0.00141609	0.00278364	0.00278364	1.04982	1.42436	0.523742	1.04982
ENSMUSG00000024188	Luc7l	0.0376442	0.299404	0.0550995	0.0265066	7.66283	0.00258316	0.000446835	0.00124886	0.00217621	0.00217621	1.03893	1.4243	0.523742	1.03893
ENSMUSG00000026365	Cfh	0.0376508	0.299404	0.300735	0.144679	3.13056	0.135211	0.0451873	0.0181901	0.0329588	0.0329588	1.23177	1.42423	0.523742	1.23177
ENSMUSG00000030659	Nucb2	0.0376002	0.299404	0.144261	0.0693832	4.9768	0.0322075	0.00643764	0.0115348	0.00666089	0.0115348	1.10516	1.42481	0.523742	1.10516
ENSMUSG00000024922	Ovol1	0.037722	0.299816	0.282662	0.136035	3.11499	0.0789525	0.0356761	0.011089	0.0334113	0.0334113	1.21644	1.42341	0.523145	1.21644
ENSMUSG00000115280	Gm7107	0.0377517	0.299898	0.583554	0.280887	1.93311	0.277695	0.210135	0.0224983	0.0844158	0.0844158	1.49854	1.42306	0.523026	1.49854
ENSMUSG00000020393	Kremen1	0.0378321	0.300228	0.0854433	0.0411444	6.90994	0.0212123	0.00081724	0.00550278	0.00246786	0.00550278	1.06101	1.42214	0.522549	1.06101
ENSMUSG00000024603	Dctn4	0.0378292	0.300228	0.0672376	0.0323771	6.8607	0.00541541	0.00141357	0.00205975	0.00250001	0.00250001	1.04771	1.42217	0.522549	1.04771
ENSMUSG00000056999	Ide	0.0378808	0.30046	-0.0880533	0.042412	6.18956	0.0173344	0.00355701	0.00147871	0.00315841	0.00315841	0.940791	1.42158	0.522214	0.940791
ENSMUSG00000039952	Dag1	0.0380204	0.301059	-0.081894	0.0394739	7.70909	0.0157203	0.000936147	0.0048811	0.00216897	0.0048811	0.944816	1.41998	0.521349	0.944816
ENSMUSG00000108681	Gm17825	0.0380178	0.301059	-0.539054	0.259827	2.09969	0.262942	0.177072	-0.0665974	0.0749659	0.0749659	0.688222	1.42001	0.521349	0.688222
ENSMUSG00000059900	Tmem40	0.0380296	0.301059	-0.573386	0.276393	1.80276	0.238726	0.192772	-0.00842517	0.0924285	0.0924285	0.672038	1.41988	0.521349	0.672038
ENSMUSG00000029521	Chek2	0.0380342	0.301059	-0.177548	0.0855864	4.17587	0.0295295	0.0144286	-0.00242033	0.0129182	0.0129182	0.884205	1.41983	0.521349	0.884205
ENSMUSG00000031381	Piga	0.0380539	0.301061	-0.085578	0.0412569	6.39659	0.00646227	0.00344642	-0.000299114	0.00290819	0.00290819	0.942407	1.4196	0.521346	0.942407
ENSMUSG00000043795	Prr33	0.0381035	0.301299	-0.52179	0.251618	2.36429	0.566414	0.113607	0.122756	0.0616406	0.122756	0.696507	1.41903	0.521003	0.696507
ENSMUSG00000027787	Nmd3	0.0382233	0.302092	-0.102663	0.0495371	6.09651	0.0119634	0.00363126	0.00553006	0.00329753	0.00553006	0.931312	1.41767	0.519861	0.931312
ENSMUSG00000028747	Htr6	0.0382943	0.302498	0.311974	0.150589	3.15203	0.237149	0.0523177	0.0108766	0.0323434	0.0323434	1.24141	1.41687	0.519278	1.24141
ENSMUSG00000015377	Dennd6b	0.0383198	0.302544	0.0889889	0.0429604	5.87373	0.00884597	0.00320295	-0.000228885	0.00368727	0.00368727	1.06362	1.41658	0.519211	1.06362
ENSMUSG00000027188	Pamr1	0.0383512	0.302637	0.7607	0.367296	1.80044	0.558853	0.22864	0.275011	0.0925763	0.275011	1.69431	1.41622	0.519077	1.69431
ENSMUSG00000023169	Slc38a1	0.0383974	0.302761	-0.0693805	0.0335076	8.1065	0.00529682	0.000545315	0.00364633	0.00215449	0.00364633	0.953047	1.4157	0.518899	0.953047
ENSMUSG00000029616	Erp29	0.0384257	0.302761	-0.0639996	0.0309134	7.99285	0.00893554	0.00110733	0.0024604	0.00214997	0.0024604	0.956608	1.41538	0.518899	0.956608
ENSMUSG00000099689	Zfp383	0.0384183	0.302761	0.0717399	0.0346509	6.55287	0.00858852	0.00170208	0.00278047	0.00275298	0.00278047	1.05098	1.41546	0.518899	1.05098
ENSMUSG00000038668	Lpar1	0.0385107	0.303031	0.0665661	0.0321672	8.2055	0.052488	0.00169888	0.000963403	0.00216411	0.00216411	1.04722	1.41442	0.518513	1.04722
ENSMUSG00000030880	Polr3e	0.0385187	0.303031	-0.0662223	0.0320024	6.81318	0.00500859	0.00129044	0.00141072	0.00253306	0.00253306	0.955136	1.41433	0.518513	0.955136
ENSMUSG00000004099	Dnmt1	0.0384814	0.303031	-0.056335	0.0272191	9.18547	0.00278203	0.000195442	0.00140096	0.0025705	0.0025705	0.961704	1.41475	0.518513	0.961704
ENSMUSG00000069631	Strada	0.0385733	0.303152	-0.0712867	0.0344595	6.53792	0.00827192	0.00166609	0.00162365	0.00276709	0.00276709	0.951789	1.41371	0.51834	0.951789
ENSMUSG00000026966	Ssna1	0.038567	0.303152	-0.0883561	0.0427093	6.67547	0.00870922	0.0013866	0.00542332	0.00264133	0.00542332	0.940594	1.41378	0.51834	0.940594
ENSMUSG00000018415	Gid4	0.0386369	0.303497	0.0627533	0.0303444	6.742	0.00290525	0.000851004	0.00112916	0.00258659	0.00258659	1.04446	1.413	0.517846	1.04446
ENSMUSG00000019899	Lama2	0.0387752	0.304274	0.127608	0.0617488	5.43919	0.0625662	0.00944922	0.00307625	0.00478564	0.00478564	1.09248	1.41145	0.516735	1.09248
ENSMUSG00000034724	Cnot6l	0.0387564	0.304274	0.0865904	0.0418966	5.96776	0.0132175	0.00304012	0.00172652	0.00351309	0.00351309	1.06186	1.41166	0.516735	1.06186
ENSMUSG00000005779	Psmb4	0.0388054	0.304356	-0.0850039	0.0411393	7.30477	0.0120794	0.000641801	0.00567665	0.00227302	0.00567665	0.942782	1.41111	0.516618	0.942782
ENSMUSG00000015342	Xk	0.038897	0.304707	0.190489	0.0922341	5.02209	0.0494909	0.00645823	0.0253017	0.00643495	0.0253017	1.14115	1.41008	0.516117	1.14115
ENSMUSG00000052446	Zfp961	0.0388786	0.304707	-0.123277	0.0596847	4.89836	0.0107071	0.00621982	0.00143648	0.0070793	0.0070793	0.9181	1.41029	0.516117	0.9181
ENSMUSG00000020752	Recql5	0.0389093	0.304707	-0.131373	0.0636142	6.0968	0.0314688	0.00989193	0.005216	0.00329707	0.005216	0.912962	1.40995	0.516117	0.912962
ENSMUSG00000038025	Phf2	0.0389706	0.30474	0.0540249	0.0261686	7.92181	0.0135557	0.000353914	0.00220265	0.00215066	0.00220265	1.03816	1.40926	0.516071	1.03816
ENSMUSG00000091405	H4c14	0.0389726	0.30474	0.62938	0.304862	1.74292	0.230577	0.25068	-0.141079	0.0962984	0.0962984	1.5469	1.40924	0.516071	1.5469
ENSMUSG00000061374	Fiz1	0.0389508	0.30474	-0.0647448	0.0313579	7.01183	0.0049815	0.00126346	0.00200234	0.00240759	0.00240759	0.956114	1.40948	0.516071	0.956114
ENSMUSG00000015542	Nat9	0.0390875	0.305135	0.195272	0.0946425	5.23074	0.0365416	0.0126138	0.0208264	0.00552204	0.0208264	1.14494	1.40796	0.515508	1.14494
ENSMUSG00000036432	Siah2	0.0390825	0.305135	0.167215	0.0810417	4.14548	0.0917072	0.0112573	0.0124276	0.0132623	0.0132623	1.12289	1.40802	0.515508	1.12289
ENSMUSG00000024892	Pcx	0.0391021	0.305135	0.131045	0.063518	4.52654	0.0250784	0.0054731	0.00253002	0.00958918	0.00958918	1.09509	1.4078	0.515508	1.09509
ENSMUSG00000020605	Hs1bp3	0.0390642	0.305135	0.180897	0.0876647	4.14311	0.0237664	0.0154014	0.00119442	0.0132896	0.0132896	1.13359	1.40822	0.515508	1.13359
ENSMUSG00000020736	Nt5c	0.0391404	0.30528	-0.0843702	0.0409026	6.17815	0.0112532	0.00307156	0.00141812	0.0031744	0.0031744	0.943196	1.40737	0.515302	0.943196
ENSMUSG00000032420	Nt5e	0.039175	0.305395	0.206836	0.100292	3.72914	0.0565353	0.0183151	-0.00196172	0.0192364	0.0192364	1.15415	1.40699	0.515139	1.15415
ENSMUSG00000025902	Sox17	0.0392492	0.305512	0.177025	0.085869	4.61646	0.0319732	0.0186323	0.00622995	0.00889538	0.00889538	1.13055	1.40617	0.514972	1.13055
ENSMUSG00000027796	Smad9	0.0392493	0.305512	0.276859	0.134296	5.14401	0.130786	0.00572953	0.0616024	0.0058778	0.0616024	1.21155	1.40617	0.514972	1.21155
ENSMUSG00000092294	Gm18200	0.0392293	0.305512	1.36787	0.663444	1.34861	2.11265	1.442	0.201257	0.125054	0.201257	2.58089	1.40639	0.514972	2.58089
ENSMUSG00000037204	Atg101	0.0393225	0.305682	-0.117658	0.0570937	4.98505	0.013591	0.00238887	0.00978062	0.00661889	0.00978062	0.921682	1.40536	0.51473	0.921682
ENSMUSG00000034032	Rpap1	0.0393306	0.305682	-0.0661342	0.0320929	7.31327	0.00456398	0.00105024	0.00279492	0.00226985	0.00279492	0.955194	1.40527	0.51473	0.955194
ENSMUSG00000028452	Vcp	0.0393297	0.305682	-0.050345	0.0244308	7.80881	0.00244842	7.09452e-05	0.00109301	0.00215734	0.00215734	0.965705	1.40528	0.51473	0.965705
ENSMUSG00000032011	Thy1	0.0395447	0.306884	0.551735	0.268031	2.57577	0.797296	0.0820185	0.186187	0.0523501	0.186187	1.46585	1.40291	0.513026	1.46585
ENSMUSG00000027358	Bmp2	0.0395331	0.306884	0.353559	0.171748	4.76251	0.200631	0.0107383	0.0993851	0.00789023	0.0993851	1.27771	1.40304	0.513026	1.27771
ENSMUSG00000074934	Grem1	0.039517	0.306884	0.215421	0.104636	5.02036	0.59126	0.0099828	0.0308923	0.00644334	0.0308923	1.16104	1.40322	0.513026	1.16104
ENSMUSG00000021975	Ints9	0.0398152	0.308005	-0.0624368	0.0303731	7.03765	0.0063689	0.00105054	0.00135048	0.00239356	0.00239356	0.957645	1.39995	0.511442	0.957645
ENSMUSG00000032500	Dclk3	0.0399085	0.308005	0.587643	0.286	2.20442	0.748251	0.166021	0.139351	0.0694535	0.139351	1.50279	1.39893	0.511442	1.50279
ENSMUSG00000028691	Prdx1	0.0399041	0.308005	-0.0562581	0.0273796	7.69561	0.00920252	0.000580553	0.00221812	0.00217096	0.00221812	0.961755	1.39898	0.511442	0.961755
ENSMUSG00000019802	Sec63	0.0399057	0.308005	-0.0817998	0.0398106	7.89316	0.00866932	0.00350105	0.00241585	0.0021517	0.00241585	0.944878	1.39897	0.511442	0.944878
ENSMUSG00000037653	Kctd8	0.0397639	0.308005	0.517679	0.251766	2.04767	0.226627	0.158816	-0.0147042	0.0778249	0.0778249	1.43165	1.40051	0.511442	1.43165
ENSMUSG00000033732	Sf3b3	0.039887	0.308005	-0.0519934	0.025302	8.54588	0.00223851	0.000151545	0.000829843	0.0022385	0.0022385	0.964603	1.39917	0.511442	0.964603
ENSMUSG00000041141	Pnmal1	0.0397871	0.308005	0.179969	0.0875356	4.47902	0.0966697	0.0113443	0.0172623	0.00998039	0.0172623	1.13286	1.40026	0.511442	1.13286
ENSMUSG00000041881	Ndufa7	0.0398103	0.308005	-0.0822636	0.0400171	6.26256	0.00979814	0.00125812	0.00472032	0.00306222	0.00472032	0.944574	1.4	0.511442	0.944574
[truncated: 13,452 more rows]

## Sheet: FNP WT
ens_gene	target_id	pval	qval	b	se_b	mean_obs	var_obs	tech_var	sigma_sq	smooth_sigma_sq	final_sigma_sq	-LOG10 P	-LOG10 Q	linear FC
ENSMUSG00000062825	Actg1	4.56752e-145	7.15091e-141	-0.965538	0.0376472	9.5518	0.253041	3.57644e-05	0.0015378	0.00260989	0.00260989	144.34	140.146	0.512087
ENSMUSG00000004665	Cnn2	8.90508e-74	6.9709e-70	-1.58175	0.0870525	7.18138	0.685783	0.00109167	0.0130542	0.00240573	0.0130542	73.0504	69.1567	0.334076
ENSMUSG00000029580	Actb	2.95445e-67	1.54183e-63	-0.666736	0.0384801	9.57655	0.122808	0.000132887	0.00153162	0.00263112	0.00263112	66.5295	62.812	0.62993
ENSMUSG00000021823	Vcl	3.61286e-65	1.41407e-61	-0.723531	0.0424406	7.24853	0.158596	0.000996794	0.0018982	0.00236546	0.00236546	64.4421	60.8495	0.605613
ENSMUSG00000023022	Lima1	5.6714e-43	1.77583e-39	-0.524732	0.0381839	7.2649	0.0758769	0.000365479	0.000170522	0.00235614	0.00235614	42.2463	38.7506	0.695088
ENSMUSG00000005103	Wdr1	1.56539e-39	4.08461e-36	-0.622363	0.0473053	6.28497	0.106975	0.000796301	0.00175186	0.00338091	0.00338091	38.8054	35.3888	0.649606
ENSMUSG00000039568	Ubald1	3.25358e-28	7.27687e-25	-0.585196	0.0531296	6.76064	0.094888	0.00251835	0.00228765	0.0027508	0.0027508	27.4876	24.1381	0.666559
ENSMUSG00000008136	Fhl2	2.59118e-24	5.07095e-21	-1.51707	0.149113	4.087	0.653442	0.0237944	0.00316143	0.0177105	0.0177105	23.5865	20.2949	0.349394
ENSMUSG00000031799	Tpm4	8.22976e-21	1.43161e-17	-0.360327	0.0385102	9.07223	0.0366617	0.000112426	0.00265591	0.00229316	0.00265591	20.0846	16.8442	0.778988
ENSMUSG00000116811	Gm16385	7.48423e-17	1.17173e-13	-0.862578	0.103437	4.81115	0.212718	0.00870596	0.0112661	0.00935777	0.0112661	16.1259	12.9312	0.549969
ENSMUSG00000015605	Srf	1.34929e-15	1.92041e-12	-1.41029	0.176507	4.74614	0.580163	0.00723498	0.0509204	0.00990433	0.0509204	14.8699	11.7166	0.376236
ENSMUSG00000032643	Fhl3	1.68996e-11	2.20483e-08	-0.443009	0.0658204	5.92662	0.0595248	0.00210551	0.00598149	0.00412301	0.00598149	10.7721	7.65662	0.735599
ENSMUSG00000026421	Csrp1	1.40951e-10	1.69748e-07	-0.261353	0.0407418	7.26887	0.021787	0.000744555	0.00178906	0.00235391	0.00235391	9.85093	6.77019	0.834305
ENSMUSG00000025967	Eef1b2	3.99814e-10	4.47107e-07	-0.221692	0.0354475	8.79018	0.0169586	0.000164849	0.00166987	0.00218066	0.00218066	9.39814	6.34959	0.857559
ENSMUSG00000043889	Gm8399	1.89821e-09	1.98123e-06	-0.58881	0.0980324	4.81897	0.101026	0.00864489	0.00334579	0.00929442	0.00929442	8.72166	5.70307	0.664891
ENSMUSG00000056201	Cfl1	2.45762e-09	2.40478e-06	-0.245872	0.0412244	9.09337	0.0198372	9.85947e-05	0.00307371	0.00230363	0.00307371	8.60948	5.61892	0.843306
ENSMUSG00000031328	Flna	3.28779e-09	3.02786e-06	-0.446412	0.0754515	7.50656	0.0620919	0.000445279	0.0101815	0.00223898	0.0101815	8.4831	5.51886	0.733866
ENSMUSG00000031349	Nsdhl	5.8454e-09	5.0842e-06	-0.305887	0.0525478	6.11967	0.027726	0.00146373	0.00237767	0.00369064	0.00369064	8.23319	5.29378	0.808945
ENSMUSG00000034926	Dhcr24	7.53121e-09	6.20572e-06	-0.252887	0.0437625	8.33575	0.0207413	0.000235872	0.00333909	0.00209763	0.00333909	8.12313	5.20721	0.839215
ENSMUSG00000027533	Fabp5	9.95397e-09	7.79196e-06	-0.25802	0.0450178	8.61861	0.0311997	0.000521512	0.00326148	0.00213566	0.00326148	8.002	5.10835	0.836235
ENSMUSG00000001473	Tubb6	4.22927e-08	3.15302e-05	-0.331527	0.0604865	6.18222	0.0567556	0.0015371	0.00529233	0.00356689	0.00529233	7.37373	4.50127	0.794695
ENSMUSG00000093930	Hmgcs1	7.77044e-08	5.52973e-05	-0.24251	0.0451402	8.72191	0.0195439	0.000198261	0.00360532	0.00216071	0.00360532	7.10955	4.2573	0.845273
ENSMUSG00000028871	Rspo1	1.13326e-07	7.71408e-05	-0.527626	0.099478	5.16291	0.0802795	0.0114845	-0.0062628	0.00698785	0.00698785	6.94567	4.11272	0.693695
ENSMUSG00000016756	Cmah	1.34619e-07	8.78167e-05	-0.266922	0.0506258	6.95445	0.0336302	0.000235904	0.0045483	0.00256951	0.0045483	6.87089	4.05642	0.831091
ENSMUSG00000024048	Myl12a	4.58069e-07	0.000286861	-0.224024	0.044422	7.53057	0.0180161	0.00065569	0.00302782	0.00222935	0.00302782	6.33907	3.54233	0.856174
ENSMUSG00000020427	Igfbp3	4.93426e-07	0.000297119	0.21377	0.0425086	6.97555	0.0209067	0.000820768	0.00189578	0.00255227	0.00255227	6.30678	3.52707	1.15971
ENSMUSG00000035215	Lsm7	5.65426e-07	0.000327863	-0.26172	0.0523161	7.07509	0.0246728	0.0026323	0.00208788	0.00247673	0.00247673	6.24762	3.48431	0.834093
ENSMUSG00000079523	Tmsb10	7.34346e-07	0.000410604	-0.258231	0.0521463	9.28553	0.0275838	0.000110685	0.00496521	0.00241293	0.00496521	6.1341	3.38658	0.836113
ENSMUSG00000067038	Rps12-ps3	8.69165e-07	0.000469229	-0.214063	0.0435162	9.26951	0.0240899	0.000122479	0.00341236	0.00240282	0.00341236	6.0609	3.32861	0.862106
ENSMUSG00000030782	Tgfb1i1	1.00842e-06	0.000526261	-0.511723	0.104647	5.16862	0.121773	0.00812011	0.0123217	0.0069568	0.0123217	5.99636	3.2788	0.701384
ENSMUSG00000015745	Plekho1	1.21017e-06	0.000611176	-0.279752	0.0576336	6.82209	0.02731	0.00184262	0.00435777	0.00268856	0.00435777	5.91715	3.21383	0.823733
ENSMUSG00000091491	Vmn2r97	1.32766e-06	0.000629873	-0.345442	0.0714376	8.58528	0.0529695	0.000187362	0.00933887	0.00212888	0.00933887	5.87691	3.20075	0.787067
ENSMUSG00000057278	Snrpg	1.29002e-06	0.000629873	-0.279605	0.0577543	7.54587	0.0363508	0.00168823	0.00453815	0.0022234	0.00453815	5.88941	3.20075	0.823816
ENSMUSG00000057863	Rpl36	1.43417e-06	0.000660391	-0.198476	0.0411759	8.09748	0.0201323	0.000257695	0.00290715	0.00209938	0.00290715	5.8434	3.1802	0.871471
ENSMUSG00000030879	Mrpl17	1.54136e-06	0.000670322	-0.297375	0.0618784	6.96863	0.0313108	0.00351998	0.00362735	0.00255787	0.00362735	5.81209	3.17372	0.813732
ENSMUSG00000031604	Msmo1	1.5052e-06	0.000670322	-0.29523	0.0613715	6.705	0.043742	0.00232399	0.00470674	0.00281134	0.00470674	5.82241	3.17372	0.814942
ENSMUSG00000025204	Ndufb8	2.21053e-06	0.000935354	-0.226316	0.047815	6.43439	0.0228959	0.00111805	0.0019123	0.00314966	0.00314966	5.6555	3.02902	0.854815
ENSMUSG00000023832	Acat2	2.6055e-06	0.00107007	-0.177736	0.0378186	8.10802	0.0104128	0.000232555	0.00243723	0.00209866	0.00243723	5.58411	2.97059	0.884089
ENSMUSG00000037805	Rpl10a	2.80231e-06	0.00107007	-0.218907	0.046727	8.75781	0.031452	0.000650173	0.00342553	0.00217086	0.00342553	5.55248	2.97059	0.859216
ENSMUSG00000029394	Cdk2ap1	2.72778e-06	0.00107007	-0.184248	0.0392827	8.00019	0.0159459	0.000441465	0.00243904	0.00210892	0.00243904	5.56419	2.97059	0.880108
ENSMUSG00000045930	Clec14a	2.74192e-06	0.00107007	0.408367	0.0870856	5.12414	0.0633245	0.00695237	0.00590542	0.00720425	0.00720425	5.56195	2.97059	1.32718
ENSMUSG00000020255	D10Wsu102e	3.01591e-06	0.00112422	-0.189949	0.0406767	9.96347	0.0137281	5.08288e-05	0.00268352	0.00303775	0.00303775	5.52058	2.94915	0.876636
ENSMUSG00000117098	Gm49909	4.94314e-06	0.00179976	-0.26244	0.0574621	7.31064	0.0231307	0.00271848	0.00344506	0.00233108	0.00344506	5.306	2.74479	0.833677
ENSMUSG00000032193	Ldlr	5.14546e-06	0.00183085	-0.280141	0.061451	6.73998	0.0433084	0.00101056	0.00603839	0.0027728	0.00603839	5.28858	2.73735	0.823511
ENSMUSG00000006398	Cdc20	5.76647e-06	0.00200622	-0.176015	0.0388145	7.10266	0.0181231	0.000354851	0.000980517	0.0024574	0.0024574	5.23909	2.69762	0.885145
ENSMUSG00000075376	Rc3h2	7.44582e-06	0.00253417	0.224649	0.0501389	6.70586	0.0212019	0.00188226	0.0017991	0.00281037	0.00281037	5.12809	2.59616	1.16849
ENSMUSG00000036781	Rps27l	7.95472e-06	0.00264977	-0.244056	0.0546427	7.07374	0.0267576	0.000829511	0.00474403	0.00247769	0.00474403	5.09938	2.57679	0.844368
ENSMUSG00000025577	Cbx2	8.26518e-06	0.00269583	-0.17806	0.03994	7.85386	0.0112088	0.000329601	0.00264811	0.00213302	0.00264811	5.08275	2.56931	0.883891
ENSMUSG00000005732	Ranbp1	9.08378e-06	0.00290236	-0.181713	0.0409457	8.34093	0.0217331	0.000162839	0.00296672	0.00209794	0.00296672	5.04173	2.53725	0.881656
ENSMUSG00000099164	Ranbp1	9.08378e-06	0.00290236	-0.181713	0.0409457	8.34093	0.0217331	0.000162839	0.00296672	0.00209794	0.00296672	5.04173	2.53725	0.881656
ENSMUSG00000068240	Gm11808	9.42016e-06	0.00294964	-0.163013	0.036797	8.51097	0.013975	0.000352586	0.00217492	0.00211598	0.00217492	5.02594	2.53023	0.893158
ENSMUSG00000058258	Idi1	1.06588e-05	0.00327205	-0.220062	0.049976	6.07426	0.0199943	0.000877098	0.00108424	0.00378509	0.00378509	4.97229	2.48518	0.858528
ENSMUSG00000018286	Psmb6	1.13968e-05	0.00343131	-0.208392	0.0474825	7.85058	0.020892	0.00038202	0.00382654	0.0021337	0.00382654	4.94322	2.46454	0.865501
ENSMUSG00000033105	Lss	1.2383e-05	0.00363662	-0.461305	0.105544	6.4773	0.0825009	0.0177036	0.00231639	0.00309021	0.00309021	4.90717	2.4393	0.726329
ENSMUSG00000059743	Fdps	1.25433e-05	0.00363662	-0.302169	0.0691791	7.24213	0.0316777	0.000559959	0.00837343	0.00236916	0.00837343	4.90159	2.4393	0.811032
ENSMUSG00000071478	H2ac7	1.54159e-05	0.00438821	-0.330592	0.0764788	6.75141	0.0367563	0.00815757	0.00249866	0.00276056	0.00276056	4.81203	2.35771	0.79521
ENSMUSG00000038690	Atp5j2	1.69e-05	0.00469275	-0.224306	0.0521356	7.22523	0.0212662	0.000756278	0.00431755	0.00237906	0.00431755	4.77211	2.32857	0.856007
ENSMUSG00000015932	Dstn	1.70853e-05	0.00469275	-0.203087	0.0472304	8.42876	0.0144623	0.000192467	0.00397153	0.00210528	0.00397153	4.76738	2.32857	0.86869
ENSMUSG00000021957	Tkt	1.73864e-05	0.00469314	-0.160239	0.0372991	8.28761	0.0172457	0.000213041	0.0023839	0.00209552	0.0023839	4.75979	2.32854	0.894877
ENSMUSG00000057322	Rpl38	1.85566e-05	0.00492411	-0.191659	0.0447636	7.74531	0.0294016	0.00043556	0.00330482	0.00215862	0.00330482	4.7315	2.30767	0.875598
ENSMUSG00000018770	Atp5g3	2.06875e-05	0.00530957	-0.171362	0.040251	8.31364	0.01549	0.000245289	0.00277898	0.00209651	0.00277898	4.68429	2.27494	0.888004
ENSMUSG00000074978	Actg-ps1	2.0532e-05	0.00530957	-1.09663	0.257484	2.83194	0.3921	0.0712087	0.02393	0.052548	0.052548	4.68757	2.27494	0.467607
ENSMUSG00000035885	Cox8a	2.22135e-05	0.00560926	-0.167051	0.0393858	7.43379	0.0153515	0.000625303	0.00165671	0.00227034	0.00227034	4.65338	2.25109	0.890662
ENSMUSG00000031633	Slc25a4	2.32674e-05	0.00578214	-0.217221	0.0513406	8.65961	0.0266055	0.000161161	0.0047591	0.00214487	0.0047591	4.63325	2.23791	0.860221
ENSMUSG00000036752	Tubb4b	2.37687e-05	0.00581442	-0.16449	0.0389217	8.21975	0.0126667	0.00021443	0.00261337	0.00209466	0.00261337	4.62399	2.23549	0.892244
ENSMUSG00000067274	Rplp0	2.52287e-05	0.00602015	-0.152241	0.0361382	9.0452	0.0166857	0.000157614	0.00168481	0.00228019	0.00228019	4.59811	2.22039	0.899852
ENSMUSG00000029311	Hsd17b11	2.53788e-05	0.00602015	-0.314776	0.0747436	5.78288	0.0345795	0.00327803	0.0071503	0.00450619	0.0071503	4.59553	2.22039	0.803976
ENSMUSG00000037071	Scd1	2.59406e-05	0.00606159	-0.293428	0.0697566	5.16016	0.0303521	0.000734062	0.00834911	0.0070029	0.00834911	4.58602	2.21741	0.815961
ENSMUSG00000021493	Pdlim7	2.66725e-05	0.00614095	-0.42587	0.101394	6.70418	0.0623043	0.00220166	0.0169889	0.00281226	0.0169889	4.57394	2.21176	0.74439
ENSMUSG00000020018	Snrpf	2.7937e-05	0.00633887	-0.163236	0.0389616	7.44827	0.018056	0.000569777	0.0018541	0.00226384	0.00226384	4.55382	2.19799	0.89302
ENSMUSG00000008892	Vdac3	2.85879e-05	0.00639388	-0.150708	0.0360163	8.03098	0.0106117	0.000316052	0.00148532	0.00210535	0.00210535	4.54382	2.19424	0.900808
ENSMUSG00000028998	Tomm7	2.93069e-05	0.00646237	-0.192623	0.0460953	6.7868	0.018379	0.00124253	0.000926693	0.00272373	0.00272373	4.53303	2.18961	0.875014
ENSMUSG00000006517	Mvd	3.00352e-05	0.00653099	-0.28261	0.0677201	6.46463	0.0287195	0.00163805	0.00692251	0.00310748	0.00692251	4.52237	2.18502	0.822103
ENSMUSG00000014294	Ndufa2	3.41908e-05	0.00733276	-0.221153	0.0533723	6.51249	0.0190697	0.00173012	0.00358727	0.00304336	0.00358727	4.46609	2.13473	0.85788
ENSMUSG00000028729	Ebna1bp2	3.78278e-05	0.00800313	-0.200448	0.0486483	6.71056	0.0204356	0.00161265	-0.00121356	0.00280511	0.00280511	4.42219	2.09674	0.87028
ENSMUSG00000005481	Ddx39	4.12713e-05	0.00861524	-0.165184	0.0402864	7.61678	0.0283372	0.000519129	0.00251046	0.00219768	0.00251046	4.38435	2.06473	0.891815
ENSMUSG00000054428	Atpif1	4.20731e-05	0.00866706	-0.200644	0.0489878	7.43231	0.0146064	0.000579897	0.00389974	0.00227102	0.00389974	4.376	2.06213	0.870162
ENSMUSG00000078193	Gm2000	4.69227e-05	0.00929901	0.377233	0.0926761	5.765	0.0489715	0.0114743	-0.00597174	0.00455824	0.00455824	4.32862	2.03156	1.29885
ENSMUSG00000025132	Arhgdia	4.69148e-05	0.00929901	-0.151523	0.0372248	8.99693	0.0111836	0.000133884	0.00245272	0.00225822	0.00245272	4.32869	2.03156	0.9003
ENSMUSG00000024844	Banf1	4.65275e-05	0.00929901	-0.189895	0.0466297	7.11271	0.0186099	0.000837295	0.00322145	0.00245052	0.00322145	4.33229	2.03156	0.876669
ENSMUSG00000090841	Myl6	5.17774e-05	0.00972925	-0.192017	0.0474413	7.90485	0.0137112	0.000321228	0.00388004	0.00212328	0.00388004	4.28586	2.01192	0.875381
ENSMUSG00000015217	Hmgb3	5.00344e-05	0.00972925	-0.146959	0.0362373	9.12398	0.0121781	0.000131856	0.00218248	0.00231934	0.00231934	4.30073	2.01192	0.903152
ENSMUSG00000060419	Rps16-ps2	5.20878e-05	0.00972925	-0.174974	0.0432456	7.93366	0.0264349	0.000957017	0.00253398	0.00211841	0.00253398	4.28326	2.01192	0.885784
ENSMUSG00000062933	Gm10123	5.20904e-05	0.00972925	-0.149453	0.036938	8.4549	0.0101847	0.000438629	0.00203302	0.00210828	0.00210828	4.28324	2.01192	0.901592
ENSMUSG00000050912	Tmem123	5.22009e-05	0.00972925	-0.240056	0.0593384	7.52456	0.0241665	0.000567288	0.00600533	0.00223173	0.00600533	4.28232	2.01192	0.846712
ENSMUSG00000033938	Ndufb7	5.74824e-05	0.0103442	-0.209602	0.052102	8.31153	0.0215184	0.00149619	0.00357109	0.00209641	0.00357109	4.24047	1.9853	0.864776
ENSMUSG00000039771	Polr2j	5.74637e-05	0.0103442	-0.208723	0.0518825	6.33316	0.0188936	0.00172291	0.00314376	0.00330176	0.00330176	4.24061	1.9853	0.865303
ENSMUSG00000043091	Tuba1c	5.62711e-05	0.0103442	-0.181574	0.0450787	8.3422	0.01784	0.000292715	0.00350051	0.00209801	0.00350051	4.24971	1.9853	0.881741
ENSMUSG00000005575	Ube2m	6.14953e-05	0.0108177	-0.168979	0.0421709	7.0078	0.0117182	0.000792882	0.00211635	0.00252677	0.00252677	4.21116	1.96587	0.889472
ENSMUSG00000029249	Rest	6.11446e-05	0.0108177	0.153552	0.0383081	8.00563	0.017637	0.000324345	0.00241501	0.00210825	0.00241501	4.21364	1.96587	1.1123
ENSMUSG00000000531	Grasp	6.54783e-05	0.0113903	0.266489	0.0667533	5.58961	0.0297675	0.00319398	0.00441629	0.0051239	0.0051239	4.1839	1.94346	1.20288
ENSMUSG00000029599	Ddx54	6.62102e-05	0.0113911	-0.160824	0.0403117	7.16293	0.0142091	0.000616011	0.000977955	0.00241739	0.00241739	4.17908	1.94344	0.894514
ENSMUSG00000020917	Acly	7.08898e-05	0.0120636	-0.173097	0.0435653	8.0231	0.0123247	0.000387927	0.00315489	0.00210621	0.00315489	4.14942	1.91852	0.886937
ENSMUSG00000034932	Mrpl54	7.45642e-05	0.0125524	-0.224609	0.0567019	6.01865	0.0264186	0.002095	-0.000930469	0.00390654	0.00390654	4.12747	1.90127	0.855827
ENSMUSG00000047702	Olfr1388	7.90307e-05	0.0131628	-0.262398	0.0664751	7.24465	0.0398434	0.000457027	0.00779165	0.0023677	0.00779165	4.1022	1.88065	0.833701
ENSMUSG00000068079	Tcf15	8.3164e-05	0.0137054	0.342715	0.087092	4.94913	0.0447814	0.00584435	0.005535	0.00831435	0.00831435	4.08006	1.86311	1.26814
ENSMUSG00000095677	Dynlt1f	9.51525e-05	0.0155178	-0.237855	0.0609474	8.34383	0.0228606	0.00132383	0.00561006	0.00209811	0.00561006	4.02158	1.80917	0.848005
ENSMUSG00000068523	Gng5	9.67795e-05	0.0156204	-0.195486	0.0501437	7.35186	0.0220886	0.000595308	0.00409821	0.00230968	0.00409821	4.01422	1.80631	0.873278
ENSMUSG00000020163	Uqcr11	0.00010348	0.0163646	-0.202226	0.0520896	6.55714	0.0237642	0.00207869	0.00273926	0.00298618	0.00298618	3.98514	1.7861	0.869208
ENSMUSG00000050428	Fbxo46	0.000103238	0.0163646	-0.248247	0.0639341	6.1122	0.0247155	0.00392423	0.00369699	0.0037059	0.0037059	3.98616	1.7861	0.841919
ENSMUSG00000029309	Sparcl1	0.000106956	0.016745	0.343089	0.0885563	5.97001	0.0418903	0.00178105	0.0128578	0.00401843	0.0128578	3.97079	1.77611	1.26847
ENSMUSG00000040824	Snrpd2	0.000109623	0.0169927	-0.200609	0.0518606	7.56379	0.0221507	0.000478427	0.00454202	0.00221661	0.00454202	3.9601	1.76974	0.870183
ENSMUSG00000025950	Idh1	0.000116377	0.0172375	-0.163454	0.0424156	6.57601	0.00878367	0.000395602	0.000826736	0.00296269	0.00296269	3.93413	1.76352	0.892885
ENSMUSG00000026254	Eif4e2	0.000114177	0.0172375	-0.157827	0.0409058	7.596	0.00980001	0.000918566	0.00159189	0.0022049	0.0022049	3.94242	1.76352	0.896374
ENSMUSG00000028044	Cks1b	0.00011531	0.0172375	-0.161204	0.0418072	7.47858	0.0222769	0.000512272	0.00275037	0.00225065	0.00275037	3.93813	1.76352	0.894278
ENSMUSG00000028932	Psmc2	0.000116708	0.0172375	-0.1394	0.0361802	8.32424	0.0105478	0.000346467	0.00182775	0.00209701	0.00209701	3.9329	1.76352	0.907897
ENSMUSG00000034192	Lsm3	0.000116078	0.0172375	-0.20053	0.052028	6.87322	0.0193242	0.00116969	0.00388322	0.00264026	0.00388322	3.93525	1.76352	0.870231
ENSMUSG00000072692	Rpl37rt	0.000118436	0.0173294	0.25046	0.0650656	7.10981	0.0225869	0.00441449	0.00348811	0.0024525	0.00348811	3.92651	1.76122	1.18959
ENSMUSG00000020808	Pimreg	0.000123437	0.0178937	-0.183599	0.0478223	6.41266	0.0155369	0.00108817	0.000724015	0.00318085	0.00318085	3.90856	1.7473	0.880503
ENSMUSG00000030037	Mrpl53	0.000125407	0.0180126	-0.224438	0.0585189	5.93627	0.0279655	0.00229299	0.0022874	0.00409934	0.00409934	3.90168	1.74442	0.855928
ENSMUSG00000017404	Rpl19	0.000128245	0.0182527	-0.146273	0.0381933	9.13205	0.0164352	9.74422e-05	0.00262552	0.00232358	0.00262552	3.89196	1.73867	0.903582
ENSMUSG00000017716	Birc5	0.00013052	0.0184092	-0.156911	0.0410173	8.35616	0.0136339	0.000599403	0.00254111	0.00209891	0.00254111	3.88432	1.73496	0.896944
ENSMUSG00000053565	Eif3k	0.000142281	0.0197128	-0.160453	0.0421782	7.59304	0.0136474	0.000490342	0.00283046	0.00220595	0.00283046	3.84685	1.70525	0.894744
ENSMUSG00000076437	Selenoh	0.000141157	0.0197128	-0.20224	0.0531354	7.53039	0.0286861	0.000465592	0.00480469	0.00222942	0.00480469	3.8503	1.70525	0.8692
ENSMUSG00000027404	Snrpb	0.000156207	0.0214524	-0.164451	0.0434943	8.40063	0.0193502	0.000339641	0.00319163	0.00210247	0.00319163	3.8063	1.66852	0.892268
ENSMUSG00000069814	Ccdc92b	0.000157928	0.0215001	0.489308	0.129506	4.16893	0.0891973	0.0148339	0.0148282	0.0164735	0.0164735	3.80154	1.66756	1.40377
ENSMUSG00000014769	Psmb1	0.000159805	0.0215682	-0.138793	0.0367632	7.87036	0.0115875	0.000393156	0.00116089	0.00212971	0.00212971	3.79641	1.66619	0.908279
ENSMUSG00000020219	Timm13	0.000161717	0.0216396	-0.275074	0.0729184	5.62112	0.036933	0.00386674	0.00605851	0.00501534	0.00605851	3.79124	1.66475	0.826408
ENSMUSG00000030751	Psma1	0.000170924	0.0224873	-0.139255	0.0370506	7.63376	0.00875705	0.000370506	0.0016951	0.00219196	0.00219196	3.7672	1.64806	0.907988
ENSMUSG00000042851	Zc3h6	0.000170707	0.0224873	0.44182	0.117542	4.72326	0.0738059	0.0156847	0.0057487	0.0101053	0.0101053	3.76775	1.64806	1.35832
ENSMUSG00000045128	Rpl18a	0.000175468	0.0228928	-0.21461	0.0571997	9.29821	0.0288881	0.000207844	0.00589954	0.00242107	0.00589954	3.7558	1.6403	0.861779
ENSMUSG00000005354	Txn2	0.000181049	0.0230679	-0.178536	0.0476847	6.41748	0.0187228	0.000813271	0.00343122	0.00317386	0.00343122	3.7422	1.63699	0.883599
ENSMUSG00000026678	Rgs5	0.000179144	0.0230679	0.404153	0.107868	4.44104	0.109901	0.00874672	0.00967247	0.0129728	0.0129728	3.7468	1.63699	1.32331
ENSMUSG00000026278	Bok	0.000181231	0.0230679	-0.39374	0.10517	4.69328	0.0619762	0.00480748	0.0158392	0.0103756	0.0158392	3.74177	1.63699	0.761154
ENSMUSG00000025810	Nrp1	0.000185767	0.0234546	0.193288	0.0517142	6.22689	0.0130698	0.00150916	0.00257894	0.00348299	0.00348299	3.73103	1.62977	1.14337
ENSMUSG00000024067	Dpy30	0.00019044	0.0238523	-0.193687	0.0519077	6.51499	0.02176	0.00162609	0.00340348	0.0030401	0.00340348	3.72024	1.62247	0.874368
ENSMUSG00000031600	Vps37a	0.000195842	0.0241426	0.235917	0.0633451	6.53411	0.0404272	0.00252216	0.00496803	0.00301537	0.00496803	3.70809	1.61722	1.17766
ENSMUSG00000059291	Rpl11	0.00019496	0.0241426	-0.155255	0.0416741	9.05985	0.017183	0.000144306	0.0030976	0.00228716	0.0030976	3.71005	1.61722	0.897973
ENSMUSG00000058897	Col25a1	0.000200479	0.0245211	0.290026	0.0779971	5.46539	0.0733031	0.00231289	0.00904308	0.00558469	0.00904308	3.69793	1.61046	1.22266
ENSMUSG00000062328	Rpl17	0.000205627	0.0249557	-0.139865	0.0376792	9.46288	0.0106996	0.000112312	0.00229143	0.00253783	0.00253783	3.68692	1.60283	0.907604
ENSMUSG00000016344	Ppdpf	0.000210732	0.0251849	-0.181326	0.0489304	7.15421	0.0121655	0.000710841	0.00375831	0.00242299	0.00375831	3.67627	1.59886	0.881892
ENSMUSG00000020717	Pecam1	0.00020967	0.0251849	0.177632	0.0479171	6.60734	0.00997535	0.00136143	0.000756563	0.00292454	0.00292454	3.67846	1.59886	1.13103
ENSMUSG00000021486	Prelid1	0.000217929	0.0258477	-0.135899	0.0367567	8.34619	0.00779672	0.000423707	0.00094004	0.00209826	0.00209826	3.66169	1.58758	0.910102
ENSMUSG00000021670	Hmgcr	0.000224991	0.0263623	-0.186583	0.050576	6.5011	0.019812	0.00163571	0.00313909	0.00305834	0.00313909	3.64784	1.57902	0.878684
ENSMUSG00000035478	Mbd3	0.000225635	0.0263623	-0.133715	0.0362525	7.97155	0.00730885	0.000340545	0.000813198	0.00211271	0.00211271	3.64659	1.57902	0.911481
ENSMUSG00000046432	Bex3	0.00024059	0.027494	-0.133343	0.0363126	8.02384	0.0110483	0.00035527	0.000812247	0.00210613	0.00210613	3.61872	1.56076	0.911717
ENSMUSG00000094347	Olfr784	0.000239554	0.027494	-0.254125	0.069184	5.39339	0.021637	0.00305582	0.00288705	0.00587884	0.00587884	3.6206	1.56076	0.838496
ENSMUSG00000021131	Erh	0.000238668	0.027494	-0.136349	0.0371107	8.08652	0.0100284	0.000470579	0.000248232	0.0021002	0.0021002	3.62221	1.56076	0.909819
ENSMUSG00000039640	Mrpl12	0.000248419	0.0279802	-0.216842	0.0591836	6.84639	0.0343187	0.000921112	0.00561726	0.00266522	0.00561726	3.60481	1.55315	0.860447
ENSMUSG00000024608	Rps14	0.000246861	0.0279802	-0.21667	0.0591106	9.42598	0.0264087	0.00010194	0.00642031	0.00250983	0.00642031	3.60755	1.55315	0.86055
ENSMUSG00000001985	Grik3	0.000251118	0.0280822	-0.38231	0.104424	4.6972	0.0624536	0.00928582	0.0110691	0.0103399	0.0110691	3.60012	1.55157	0.767208
ENSMUSG00000021767	Kat6b	0.000255689	0.0283905	0.15626	0.0427349	6.80271	0.010012	0.000701358	0.00227436	0.00270768	0.00270768	3.59229	1.54683	1.11439
ENSMUSG00000002477	Snrpd1	0.000261733	0.0286552	-0.139314	0.038163	7.35051	0.0112049	0.000408277	0.000539363	0.00231037	0.00231037	3.58214	1.5428	0.907951
ENSMUSG00000020153	Ndufs7	0.000261695	0.0286552	-0.202085	0.0553576	6.47701	0.0177723	0.00170909	0.00401125	0.0030906	0.00401125	3.5822	1.5428	0.869293
ENSMUSG00000067288	Rps28	0.000268606	0.0292035	-0.130507	0.0358157	8.31213	0.011295	0.000298059	0.00185617	0.00209644	0.00209644	3.57088	1.53457	0.913511
ENSMUSG00000068749	Psma5	0.000287274	0.0297852	-0.141408	0.038993	7.24848	0.0125116	0.000428535	0.00240964	0.00236549	0.00240964	3.5417	1.526	0.906634
ENSMUSG00000063316	Rpl27	0.000282416	0.0297852	-0.290393	0.0799779	8.25291	0.0432279	0.000453181	0.0114869	0.00209477	0.0114869	3.54911	1.526	0.817679
ENSMUSG00000020022	Ndufa12	0.000286117	0.0297852	-0.239737	0.0660878	7.28096	0.028287	0.00170546	0.0064474	0.00234718	0.0064474	3.54346	1.526	0.8469
ENSMUSG00000004552	Ctse	0.000281602	0.0297852	0.399029	0.109875	4.86847	0.0640143	0.00606584	0.0164696	0.00890541	0.0164696	3.55036	1.526	1.31862
ENSMUSG00000020171	Yeats4	0.000284712	0.0297852	-0.144811	0.0399056	7.46216	0.0112829	0.000714869	0.00200194	0.00225772	0.00225772	3.54559	1.526	0.904498
ENSMUSG00000022351	Sqle	0.000281543	0.0297852	-0.243271	0.0669852	7.97925	0.0222569	0.000375711	0.00800005	0.00211165	0.00800005	3.55046	1.526	0.844828
ENSMUSG00000028519	Dab1	0.000283556	0.0297852	-0.480308	0.132321	4.13434	0.0651298	0.0156989	-0.0121394	0.0169842	0.0169842	3.54736	1.526	0.716825
ENSMUSG00000115338	Pnp	0.000292677	0.0301458	-0.241929	0.0667998	5.86663	0.0244199	0.00335138	0.00497808	0.00427572	0.00497808	3.53361	1.52077	0.845614
ENSMUSG00000021838	Samd4	0.000298019	0.0304215	0.265395	0.073374	5.55202	0.0260985	0.0024575	0.00759214	0.00525764	0.00759214	3.52576	1.51682	1.20196
ENSMUSG00000096255	Dynlt1b	0.00029924	0.0304215	-0.2156	0.0596245	7.58593	0.0188113	0.000651539	0.00598461	0.0022085	0.00598461	3.52398	1.51682	0.861188
ENSMUSG00000022762	Ncam2	0.0003026	0.0304407	0.922261	0.255257	3.36189	0.330281	0.0321728	0.0894523	0.0336544	0.0894523	3.51913	1.51654	1.89508
ENSMUSG00000003970	Rpl8	0.000303318	0.0304407	-0.157588	0.0436237	9.72881	0.0180583	7.44692e-05	0.00347785	0.00277378	0.00347785	3.5181	1.51654	0.896522
ENSMUSG00000024640	Psat1	0.000313801	0.0312922	-0.204125	0.0566443	5.81341	0.0451137	0.000646929	0.00534241	0.00441972	0.00534241	3.50335	1.50456	0.868065
ENSMUSG00000067336	Bmpr2	0.000321325	0.0313154	0.142205	0.0395291	7.13329	0.00979057	0.000280427	0.00263633	0.00243669	0.00263633	3.49305	1.50424	1.10359
ENSMUSG00000079225	Gm9531	0.000316829	0.0313154	-0.274672	0.0762737	7.29108	0.0298202	0.00347981	0.00737985	0.00234163	0.00737985	3.49918	1.50424	0.826638
ENSMUSG00000008373	Prpf31	0.000322035	0.0313154	-0.146885	0.0408367	7.82907	0.012937	0.000974632	0.00154739	0.00213828	0.00213828	3.4921	1.50424	0.903198
ENSMUSG00000030652	Coq7	0.000318154	0.0313154	-0.192183	0.0533833	6.47994	0.0220076	0.00223295	-0.000182822	0.00308663	0.00308663	3.49736	1.50424	0.875281
ENSMUSG00000031948	Kars	0.000326098	0.0315148	-0.129372	0.0360003	8.40241	0.0143711	0.000316595	0.00113512	0.00210264	0.00210264	3.48665	1.50149	0.91423
ENSMUSG00000023004	Tuba1b	0.000328964	0.0315967	-0.138365	0.0385272	9.68425	0.0131684	4.09419e-05	0.002358	0.00272984	0.00272984	3.48285	1.50036	0.908548
ENSMUSG00000041881	Ndufa7	0.000331166	0.0316142	-0.17652	0.0491751	6.2741	0.0130019	0.00111454	0.00238046	0.00339942	0.00339942	3.47995	1.50012	0.884835
ENSMUSG00000040327	Cul9	0.00034016	0.0321652	0.676706	0.188886	5.38585	0.169695	0.0189092	0.0476893	0.00591093	0.0476893	3.46832	1.49261	1.59849
ENSMUSG00000030122	Ptms	0.000341047	0.0321652	-0.233729	0.0652521	7.89011	0.0260115	0.000362565	0.00758539	0.00212595	0.00758539	3.46719	1.49261	0.850434
ENSMUSG00000012848	Rps5	0.000374526	0.0351113	-0.136692	0.0384244	9.21896	0.0141358	0.000107562	0.00264845	0.00237213	0.00264845	3.42652	1.45455	0.909603
ENSMUSG00000059195	Gm12715	0.000379492	0.0353651	-0.688647	0.19377	4.39519	0.176479	0.0565783	-0.00718678	0.0135087	0.0135087	3.4208	1.45143	0.620435
ENSMUSG00000048087	Gm4737	0.000389663	0.036098	-0.18471	0.0520752	8.55375	0.0281897	0.000169867	0.00489222	0.00212303	0.00489222	3.40931	1.44252	0.879826
ENSMUSG00000025364	Pa2g4	0.000393542	0.0362429	-0.128107	0.0361438	8.77086	0.0160077	0.000175551	0.00226301	0.00217474	0.00226301	3.40501	1.44078	0.915031
ENSMUSG00000021243	Fcf1	0.000396935	0.0363416	-0.184646	0.0521287	6.3282	0.016222	0.00168622	0.00338625	0.0033097	0.00338625	3.40128	1.4396	0.879865
ENSMUSG00000114547	Gm3226	0.000407762	0.0370527	-0.211434	0.0598115	7.05081	0.020319	0.00133237	0.00534548	0.0024943	0.00534548	3.38959	1.43118	0.863678
ENSMUSG00000071359	Tbpl1	0.000409436	0.0370527	-0.231454	0.0654948	6.3695	0.0246367	0.00354927	0.00445792	0.00324509	0.00445792	3.38781	1.43118	0.851776
ENSMUSG00000062006	Rpl34	0.000411932	0.0370644	-0.194354	0.0550216	8.03697	0.0230706	0.000539111	0.00511199	0.00210471	0.00511199	3.38517	1.43104	0.873964
ENSMUSG00000037400	Atp11b	0.000419015	0.0374863	0.200057	0.0567087	6.07121	0.0124158	0.00221136	0.000134751	0.0037916	0.0037916	3.37777	1.42613	1.14874
ENSMUSG00000033768	Nrxn2	0.000426398	0.0377157	0.576604	0.16366	5.07726	0.126109	0.0308787	0.0191191	0.00747944	0.0191191	3.37019	1.42348	1.49133
ENSMUSG00000052144	Ppp4r2	0.000424522	0.0377157	0.149087	0.0423019	7.65354	0.00713895	0.00115479	0.000441032	0.00218552	0.00218552	3.3721	1.42348	1.10887
ENSMUSG00000107104	Nrxn2	0.000426398	0.0377157	0.576604	0.16366	5.07726	0.126109	0.0308787	0.0191191	0.00747944	0.0191191	3.37019	1.42348	1.49133
ENSMUSG00000024217	Snrpc	0.000431383	0.0379423	-0.139725	0.0396935	7.57063	0.0149649	0.000726999	0.00104697	0.00221407	0.00221407	3.36514	1.42088	0.907692
ENSMUSG00000073616	Cops9	0.000435604	0.0380995	-0.209515	0.0595633	6.46245	0.0224207	0.00255099	0.00407154	0.00311047	0.00407154	3.36091	1.41908	0.864828
ENSMUSG00000040097	Flywch1	0.000438789	0.0381649	-0.143343	0.0407737	7.96282	0.00764118	0.000989371	0.000753776	0.00211395	0.00211395	3.35774	1.41834	0.905418
ENSMUSG00000074506	Gm10705	0.000446124	0.0385885	-0.393662	0.112117	5.32093	0.0812413	0.0172664	-0.00771816	0.00619794	0.00619794	3.35054	1.41354	0.761195
ENSMUSG00000037894	H2az1	0.000449037	0.038627	-0.144375	0.0411389	9.50067	0.0136255	8.48166e-05	0.00307435	0.00256765	0.00307435	3.34772	1.41311	0.904771
ENSMUSG00000026686	Lmx1a	0.000453259	0.0387772	0.508157	0.1449	4.44075	0.0973939	0.0115938	0.0275985	0.0129761	0.0275985	3.34365	1.41142	1.42223
ENSMUSG00000016252	Atp5e	0.000462462	0.0391368	-0.145009	0.041412	7.13887	0.0131713	0.000750302	0.00245095	0.00243301	0.00245095	3.33492	1.40741	0.904374
ENSMUSG00000023951	Vegfa	0.000461331	0.0391368	0.309804	0.0884583	6.213	0.0360981	0.00176942	0.012837	0.00350858	0.012837	3.33599	1.40741	1.23954
ENSMUSG00000020738	Sumo2	0.000470251	0.0393704	-0.125178	0.0357943	9.02969	0.00751674	0.000118666	0.00133539	0.00227297	0.00227297	3.32767	1.40483	0.916891
ENSMUSG00000045193	Cirbp	0.000470106	0.0393704	-0.161074	0.0460575	6.77076	0.0106733	0.00121953	0.000313478	0.00274023	0.00274023	3.3278	1.40483	0.894359
ENSMUSG00000032058	Ppp2r1b	0.000480784	0.0400381	-0.141309	0.0404752	7.40869	0.00900989	0.000602749	0.00245531	0.00228194	0.00245531	3.31805	1.39753	0.906696
ENSMUSG00000031274	Col4a5	0.00048731	0.0403668	0.195398	0.056026	6.20826	0.0251327	0.00234188	0.00173834	0.00351742	0.00351742	3.31219	1.39398	1.14504
ENSMUSG00000007603	Dus3l	0.000503672	0.0414092	-0.1651	0.0474589	6.59957	0.00929323	0.00127046	0.00085676	0.00293391	0.00293391	3.29785	1.3829	0.891867
ENSMUSG00000006728	Cdk4	0.000505184	0.0414092	-0.145533	0.0418441	9.14742	0.011898	0.000475706	0.00279269	0.00233179	0.00279269	3.29655	1.3829	0.904045
ENSMUSG00000045273	Cenph	0.000539443	0.043987	-0.166478	0.0481098	6.45631	0.0171895	0.00120156	0.00241704	0.00311895	0.00311895	3.26805	1.35668	0.891015
ENSMUSG00000032220	Myo1e	0.000546376	0.0443216	-0.193811	0.0560645	6.47759	0.0202307	0.00137172	0.00449565	0.0030898	0.00449565	3.26251	1.35338	0.874293
ENSMUSG00000024181	Mrpl28	0.00055233	0.0445335	-0.156942	0.0454376	6.94011	0.0199017	0.00127238	0.00253687	0.00258149	0.00258149	3.2578	1.35131	0.896925
ENSMUSG00000052551	Adarb2	0.000554677	0.0445335	-0.294779	0.0853725	5.19834	0.0438757	0.00576158	0.00784356	0.00679832	0.00784356	3.25596	1.35131	0.815197
ENSMUSG00000015289	Lage3	0.000560864	0.044741	-0.191977	0.0556477	6.1765	0.0148279	0.00220253	0.00326958	0.00357791	0.00357791	3.25114	1.34929	0.875405
ENSMUSG00000055839	Elob	0.000562977	0.044741	-0.185547	0.0537996	7.35156	0.0159136	0.000566799	0.00483607	0.00230983	0.00483607	3.24951	1.34929	0.879316
ENSMUSG00000033857	Engase	0.000567471	0.0448703	-0.394914	0.114577	5.40797	0.0658541	0.018688	-0.00737058	0.00581751	0.00581751	3.24606	1.34804	0.760535
ENSMUSG00000058833	Rex1bd	0.00057313	0.04509	-0.181165	0.0526026	6.29667	0.0147217	0.00180388	0.00118887	0.00336126	0.00336126	3.24175	1.34592	0.881991
ENSMUSG00000039001	Rps21	0.000580188	0.0451279	-0.188585	0.0548099	8.32274	0.0275387	0.000252233	0.00535547	0.00209694	0.00535547	3.23643	1.34555	0.877466
ENSMUSG00000047694	Yipf6	0.000582258	0.0451279	-0.328001	0.0953562	5.04811	0.0328859	0.00931473	-0.00718046	0.00765851	0.00765851	3.23488	1.34555	0.796639
ENSMUSG00000027496	Aurka	0.000576879	0.0451279	-0.138797	0.0403215	7.06332	0.0119296	0.00054968	0.00209741	0.00248518	0.00248518	3.23892	1.34555	0.908276
ENSMUSG00000021273	Fdft1	0.000588398	0.0453791	-0.206206	0.0599975	7.45047	0.0226276	0.0010416	0.00567784	0.00226286	0.00567784	3.23033	1.34314	0.866814
ENSMUSG00000029911	Ssbp1	0.000592955	0.0455064	-0.153211	0.0446052	6.95846	0.00962841	0.00114777	0.000511199	0.0025662	0.0025662	3.22698	1.34193	0.899247
ENSMUSG00000028873	Cdca8	0.000605593	0.0461614	-0.140183	0.0408805	7.2739	0.0153213	0.000768495	-5.11544e-06	0.0023511	0.0023511	3.21782	1.33572	0.907404
ENSMUSG00000073702	Rpl31	0.000607386	0.0461614	-0.15916	0.0464255	8.27902	0.0147448	0.00086419	0.00315909	0.00209527	0.00315909	3.21653	1.33572	0.895546
ENSMUSG00000070493	Chchd2	0.000615868	0.0465799	-0.150237	0.0438708	8.98859	0.0136071	0.000272703	0.00331997	0.00225458	0.00331997	3.21051	1.3318	0.901103
ENSMUSG00000038628	Polr3k	0.000634929	0.0474164	-0.151286	0.0442844	6.8538	0.00770744	0.00100248	0.000971488	0.00265825	0.00265825	3.19728	1.32407	0.900447
ENSMUSG00000023845	Lnpep	0.000633804	0.0474164	0.224964	0.0658422	5.93471	0.0271198	0.00175703	0.00633533	0.00410317	0.00633533	3.19805	1.32407	1.16875
ENSMUSG00000026709	Dars2	0.000636014	0.0474164	-0.191643	0.0561054	6.81659	0.0204281	0.00261978	0.00325614	0.00269394	0.00325614	3.19653	1.32407	0.875608
ENSMUSG00000066415	Msl2	0.000657076	0.0487544	0.134334	0.0394301	7.60303	0.00731352	0.000540005	0.00236216	0.00220243	0.00236216	3.18238	1.31199	1.09759
ENSMUSG00000003429	Rps11	0.000663116	0.0489705	-0.1275	0.0374518	8.7212	0.0135461	0.000107213	0.00251104	0.00216052	0.00251104	3.17841	1.31007	0.915416
ENSMUSG00000057036	Gm7536	0.000666747	0.0490074	-0.135221	0.0397371	8.65318	0.0147311	0.000237999	0.00270953	0.00214337	0.00270953	3.17604	1.30974	0.91053
ENSMUSG00000050714	Zbtb26	0.000674339	0.0493339	0.172356	0.050696	6.65104	0.0114258	0.00143952	0.00335797	0.0028729	0.00335797	3.17112	1.30685	1.1269
ENSMUSG00000093904	Tomm20	0.000677792	0.0493559	-0.192931	0.056771	8.39734	0.0239557	0.0024246	0.00359156	0.00210217	0.00359156	3.1689	1.30666	0.874827
ENSMUSG00000029208	Guf1	0.000692008	0.0496976	0.151378	0.0446183	6.73022	0.00955868	0.000932749	0.00171759	0.00278339	0.00278339	3.15989	1.30366	1.11063
ENSMUSG00000001175	Calm1	0.000690363	0.0496976	-0.162638	0.047928	9.08243	0.0170279	0.000559312	0.0037286	0.00229817	0.0037286	3.16092	1.30366	0.89339
ENSMUSG00000092074	Dynlt1a	0.000686694	0.0496976	-0.29697	0.0874769	6.41951	0.0434674	0.00784855	0.00643555	0.00317093	0.00643555	3.16324	1.30366	0.81396
ENSMUSG00000079435	Rpl36a	0.000706378	0.0502684	-0.1517	0.0447877	8.45838	0.0184934	0.000579207	0.00316521	0.00210871	0.00316521	3.15096	1.2987	0.900189
ENSMUSG00000047721	Bola2	0.000704767	0.0502684	-0.234705	0.0692812	6.07977	0.0343715	0.00518637	-0.000116984	0.00377342	0.00377342	3.15195	1.2987	0.849859
ENSMUSG00000042506	Usp22	0.000723178	0.0510003	0.149012	0.0440781	6.95831	0.00878987	0.00106039	0.00253282	0.00256632	0.00256632	3.14075	1.29243	1.10881
ENSMUSG00000032413	Rasa2	0.000721526	0.0510003	0.318314	0.0941405	6.14855	0.0327307	0.0129106	-0.0074558	0.00363262	0.00363262	3.14175	1.29243	1.24687
ENSMUSG00000033910	Gucy1a1	0.000732979	0.0513822	0.693297	0.205303	3.15971	0.165397	0.0386151	0.0133769	0.040064	0.040064	3.13491	1.28919	1.61697
ENSMUSG00000082896	Gm5844	0.000738439	0.0513822	0.503332	0.14914	3.9998	0.117974	0.0190448	0.0224749	0.0191356	0.0224749	3.13169	1.28919	1.41748
ENSMUSG00000024665	Fads2	0.000738214	0.0513822	-0.137212	0.0406555	6.7667	0.00810448	0.000340911	0.000873441	0.00274445	0.00274445	3.13182	1.28919	0.909275
ENSMUSG00000053398	Phgdh	0.000747747	0.0517997	-0.145467	0.0431468	6.7839	0.0215271	0.00074839	0.00270925	0.00272669	0.00272669	3.12625	1.28567	0.904087
ENSMUSG00000051839	Gypa	0.000761724	0.0525355	0.335913	0.0997857	5.53459	0.0566367	0.00351706	0.0150697	0.00532125	0.0150697	3.1182	1.27955	1.26218
ENSMUSG00000063445	Nmral1	0.000775843	0.0527603	-0.136487	0.0406057	7.59152	0.00899809	0.000499145	0.00257866	0.00220649	0.00257866	3.11023	1.27769	0.909732
ENSMUSG00000027679	Dnajc19	0.000778463	0.0527603	-0.233496	0.0694859	5.72055	0.0337481	0.00432056	0.00297157	0.00469226	0.00469226	3.10876	1.27769	0.850571
ENSMUSG00000078348	Sf3b5	0.000777176	0.0527603	-0.272501	0.0810822	6.64655	0.0337468	0.00116326	0.0111088	0.00287813	0.0111088	3.10948	1.27769	0.827883
ENSMUSG00000006333	Rps9	0.000776011	0.0527603	-0.156749	0.0466347	9.53591	0.0156999	8.09231e-05	0.00397869	0.00259652	0.00397869	3.11013	1.27769	0.897044
ENSMUSG00000060288	Ppih	0.00078704	0.0531116	-0.174731	0.052045	6.67783	0.0184015	0.00142047	0.00363574	0.00284206	0.00363574	3.104	1.27481	0.885932
ENSMUSG00000024940	Ltbp3	0.000794935	0.0534142	0.343119	0.102285	4.88561	0.128887	0.0107539	0.00557517	0.00877541	0.00877541	3.09967	1.27234	1.2685
ENSMUSG00000039109	F13a1	0.000804525	0.0538275	0.475272	0.14182	4.58973	0.131783	0.0122769	0.0252671	0.0113711	0.0252671	3.09446	1.269	1.39018
ENSMUSG00000045294	Insig1	0.00081017	0.0539746	-0.33098	0.0988208	6.77175	0.0687532	0.000971744	0.0172573	0.0027392	0.0172573	3.09142	1.26781	0.794996
ENSMUSG00000005779	Psmb4	0.000817946	0.0540185	-0.169841	0.0507494	7.30043	0.0135317	0.00057955	0.00422806	0.00233656	0.00422806	3.08728	1.26746	0.888941
ENSMUSG00000004667	Polr2e	0.000814301	0.0540185	-0.143484	0.042858	7.42713	0.0156386	0.000630473	0.00279823	0.00227338	0.00279823	3.08922	1.26746	0.90533
ENSMUSG00000025872	Thoc3	0.000821181	0.0540185	-0.200762	0.0600086	6.48264	0.0179055	0.00363893	0.00145157	0.00308298	0.00308298	3.08556	1.26746	0.870091
ENSMUSG00000039680	Mrps6	0.000825525	0.0540771	-0.193085	0.0577391	6.11641	0.0163091	0.00252581	0.000674726	0.00369729	0.00369729	3.08327	1.26699	0.874733
ENSMUSG00000020133	2310011J03Rik	0.000829413	0.0541054	-0.192455	0.0575733	6.06638	0.0152235	0.00238548	0.00241904	0.00380192	0.00380192	3.08123	1.26676	0.875115
ENSMUSG00000033475	Tomm6	0.000848125	0.0550077	-0.169836	0.0509011	7.02721	0.0152278	0.0010036	0.00383278	0.0025119	0.00383278	3.07154	1.25958	0.888944
ENSMUSG00000058709	Egln2	0.000850272	0.0550077	-0.155372	0.046576	6.56669	0.00912847	0.00107516	0.00267528	0.00297424	0.00297424	3.07044	1.25958	0.897901
ENSMUSG00000040466	Blvrb	0.000873791	0.0562966	0.28749	0.0863776	5.14417	0.0403536	0.00683612	0.00330119	0.00709123	0.00709123	3.05859	1.24952	1.22052
ENSMUSG00000062647	Rpl7a	0.000884742	0.0567685	-0.155645	0.046813	9.52248	0.0193567	9.05548e-05	0.00400016	0.0025854	0.00400016	3.05318	1.24589	0.897731
ENSMUSG00000066878	Gm10184	0.000898052	0.0573873	-0.118615	0.0357202	8.95366	0.00825305	0.000141943	0.000896451	0.0022398	0.0022398	3.0467	1.24118	0.921072
ENSMUSG00000045498	Pcdhb3	0.00092419	0.0588176	0.612004	0.184748	3.5046	0.252928	0.0331674	0.0305453	0.029702	0.0305453	3.03424	1.23049	1.52838
ENSMUSG00000063457	Rps15	0.000940893	0.0593156	-0.189211	0.0572043	9.02275	0.021536	0.000163486	0.00594487	0.00226979	0.00594487	3.02646	1.22683	0.877086
ENSMUSG00000040385	Ppp1ca	0.000943382	0.0593156	-0.140007	0.0423379	7.85027	0.0147442	0.000199638	0.00314636	0.00213376	0.00314636	3.02531	1.22683	0.907515
ENSMUSG00000098274	Rpl24	0.000936906	0.0593156	-0.11599	0.0350549	8.58782	0.0125958	0.000143542	0.00215031	0.00212937	0.00215031	3.0283	1.22683	0.922749
ENSMUSG00000096994	Ppp1ca	0.000943382	0.0593156	-0.140007	0.0423379	7.85027	0.0147442	0.000199638	0.00314636	0.00213376	0.00314636	3.02531	1.22683	0.907515
ENSMUSG00000061411	Nol4l	0.000950159	0.0595027	0.192986	0.0583941	6.04613	0.0180655	0.00251938	-0.000205602	0.00384572	0.00384572	3.0222	1.22546	1.14313
ENSMUSG00000071866	Ppia	0.000957461	0.0597212	-0.138716	0.0420003	9.85382	0.0120339	0.000310756	0.00298209	0.00290733	0.00298209	3.01888	1.22387	0.908327
ENSMUSG00000018654	Ikzf1	0.00096456	0.0599252	0.75253	0.227993	3.56367	0.278444	0.0688362	-0.0621785	0.028195	0.028195	3.01567	1.22239	1.68474
ENSMUSG00000068744	Psrc1	0.000983424	0.0600542	-0.159165	0.0483017	6.48458	0.0087058	0.00127466	0.000859423	0.00308038	0.00308038	3.00726	1.22146	0.895543
ENSMUSG00000007892	Rplp1	0.000985815	0.0600542	-0.175525	0.0532775	9.50368	0.0268611	7.63003e-05	0.00522222	0.00257007	0.00522222	3.0062	1.22146	0.885445
ENSMUSG00000036502	Tmem255a	0.000978444	0.0600542	0.195107	0.0591833	6.42546	0.0148347	0.00288719	0.0036511	0.00316239	0.0036511	3.00946	1.22146	1.14481
ENSMUSG00000022205	Sub1	0.000980479	0.0600542	-0.125931	0.0382066	7.72737	0.012219	0.000561355	0.00213725	0.00216349	0.00216349	3.00856	1.22146	0.916412
ENSMUSG00000030842	Lamtor1	0.000974332	0.0600542	-0.150263	0.0455642	6.8311	0.0101978	0.00119554	0.00173411	0.00267983	0.00267983	3.01129	1.22146	0.901086
ENSMUSG00000009927	Rps25	0.00102082	0.0617066	-0.121696	0.0370491	9.20041	0.0161098	0.00020093	0.00191305	0.00236133	0.00236133	2.99105	1.20967	0.919106
ENSMUSG00000029108	Pcdh7	0.00101697	0.0617066	0.214073	0.0651512	6.01418	0.0259107	0.00222762	0.00569578	0.00391659	0.00569578	2.99269	1.20967	1.15996
ENSMUSG00000020460	Rps27a	0.00102701	0.0618419	-0.118717	0.036161	9.09855	0.0105704	0.000134634	0.00219284	0.00230625	0.00230625	2.98842	1.20872	0.921006
ENSMUSG00000069744	Psmb3	0.00103614	0.0621527	-0.136047	0.0414711	7.43802	0.0160969	0.000632766	0.00257763	0.00226843	0.00257763	2.98458	1.20654	0.910009
ENSMUSG00000061689	Dlgap4	0.00104353	0.0623568	-0.13859	0.042272	7.15005	0.00788488	0.000909894	0.0012351	0.00242569	0.00242569	2.9815	1.20512	0.908407
ENSMUSG00000090963	Gm17655	0.00106473	0.0624832	1.08569	0.331727	4.49007	0.435691	0.192992	-0.0514251	0.0124219	0.0124219	2.97276	1.20424	2.12239
ENSMUSG00000013701	Timm23	0.00104969	0.0624832	-0.213855	0.0652621	6.90491	0.0272871	0.000676592	0.00727379	0.00261181	0.00727379	2.97894	1.20424	0.86223
ENSMUSG00000040459	Arglu1	0.0010656	0.0624832	0.140826	0.0430318	8.17651	0.0121426	0.000545935	0.00291064	0.00209541	0.00291064	2.97241	1.20424	1.10254
ENSMUSG00000021051	Ppp2r5e	0.00105879	0.0624832	0.144039	0.0439891	6.75275	0.00738394	0.000852938	0.00126056	0.00275914	0.00275914	2.97519	1.20424	1.10499
ENSMUSG00000039183	Nubp2	0.00106504	0.0624832	-0.19493	0.0595614	6.14843	0.0220322	0.00267183	0.00395027	0.00363287	0.00395027	2.97264	1.20424	0.873615
ENSMUSG00000029166	Mapre3	0.00107695	0.0626794	0.340648	0.104186	5.41672	0.0498737	0.011157	0.00910517	0.00578114	0.00910517	2.9678	1.20287	1.26633
ENSMUSG00000028745	Capzb	0.00107637	0.0626794	-0.178358	0.0545477	7.4204	0.0137422	0.000306562	0.00524762	0.00227648	0.00524762	2.96804	1.20287	0.883708
ENSMUSG00000022602	Arc	0.00108991	0.0629653	-1.0092	0.30898	2.47076	0.334089	0.108906	-0.0570531	0.0693021	0.0693021	2.96261	1.2009	0.496822
ENSMUSG00000063696	Gm8730	0.00108656	0.0629653	-0.185569	0.0567993	9.10149	0.0260952	0.000115712	0.00590645	0.00230774	0.00590645	2.96395	1.2009	0.879302
ENSMUSG00000074884	Serf2	0.00109411	0.0629759	-0.189826	0.0581373	8.59476	0.0199864	0.00101673	0.00529251	0.00213074	0.00529251	2.96094	1.20083	0.876711
ENSMUSG00000046691	Chtf8	0.00110119	0.0631512	-0.139194	0.0426544	7.97707	0.00675887	0.00128426	0.000904853	0.00211194	0.00211194	2.95814	1.19962	0.908026
ENSMUSG00000035722	Abca7	0.00111611	0.063315	0.240484	0.0737796	5.4824	0.0234938	0.00369884	0.00646222	0.00551827	0.00646222	2.95229	1.19849	1.18139
ENSMUSG00000021728	Emb	0.00111105	0.063315	-0.154396	0.0473493	6.36281	0.0105965	0.000814141	0.00337084	0.00325534	0.00337084	2.95426	1.19849	0.898509
ENSMUSG00000040952	Rps19	0.00111618	0.063315	-0.126365	0.0387686	8.85577	0.0146616	0.000310031	0.00249558	0.00220243	0.00249558	2.95226	1.19849	0.916137
ENSMUSG00000035960	Apex1	0.00112304	0.063474	-0.201198	0.0617601	7.93496	0.0241585	0.000365654	0.00675439	0.0021182	0.00675439	2.94961	1.1974	0.869828
ENSMUSG00000036751	Cox6b1	0.00113034	0.0636571	-0.160911	0.0494214	6.30359	0.024205	0.00120953	0.00222513	0.00334976	0.00334976	2.94679	1.19615	0.89446
ENSMUSG00000054226	Tprkb	0.00113872	0.063899	-0.250268	0.0769156	5.39751	0.0204671	0.00518178	-0.00448772	0.00586143	0.00586143	2.94358	1.19451	0.84074
ENSMUSG00000037710	Cisd1	0.00116187	0.0647337	-0.200697	0.0617893	5.90343	0.0229479	0.00294589	-0.0016909	0.0041809	0.0041809	2.93484	1.18887	0.87013
ENSMUSG00000073676	Hspe1	0.0011603	0.0647337	-0.181108	0.0557518	8.16282	0.0283311	0.000301239	0.00550086	0.00209585	0.00550086	2.93543	1.18887	0.882026
ENSMUSG00000022956	Atp5o	0.00119204	0.0661796	-0.170899	0.052734	7.19529	0.0146314	0.00045661	0.00473436	0.00239711	0.00473436	2.92371	1.17928	0.888289
ENSMUSG00000116933	Atp5o	0.00119204	0.0661796	-0.170899	0.052734	7.19529	0.0146314	0.00045661	0.00473436	0.00239711	0.00473436	2.92371	1.17928	0.888289
ENSMUSG00000074129	Rpl13a	0.00120395	0.0665437	-0.129993	0.0401468	9.37776	0.0121348	0.000181089	0.00282753	0.00247486	0.00282753	2.91939	1.17689	0.913836
ENSMUSG00000002661	Alkbh7	0.00121135	0.0665437	-0.272002	0.0840501	5.04612	0.0282673	0.0055159	0.00461733	0.007671	0.007671	2.91673	1.17689	0.828169
ENSMUSG00000031546	Gins4	0.00120989	0.0665437	-0.157418	0.0486377	6.81112	0.0187531	0.00101613	0.0033997	0.00269933	0.0033997	2.91725	1.17689	0.896629
ENSMUSG00000075266	Cenpw	0.00123261	0.0674748	-0.171661	0.0531257	6.66347	0.0108946	0.00240985	0.0018309	0.00285851	0.00285851	2.90917	1.17086	0.88782
ENSMUSG00000030603	Psmc4	0.00126313	0.0675059	-0.17749	0.0550489	7.55488	0.0176179	0.000909568	0.00474713	0.00221997	0.00474713	2.89855	1.17066	0.88424
ENSMUSG00000030744	Rps3	0.00125477	0.0675059	-0.12949	0.040138	9.48021	0.0195053	0.000229328	0.00277798	0.00255136	0.00277798	2.90144	1.17066	0.914154
ENSMUSG00000109324	Prmt1	0.00125878	0.0675059	-0.154027	0.047757	8.63296	0.0170121	0.000266275	0.00399109	0.00213878	0.00399109	2.90005	1.17066	0.898739
ENSMUSG00000020091	Eif4ebp2	0.00126336	0.0675059	-0.124165	0.0385106	8.35125	0.0101286	0.000650067	0.00211833	0.00209858	0.00211833	2.89847	1.17066	0.917535
ENSMUSG00000044533	Rps2	0.00124379	0.0675059	-0.23906	0.0740435	9.91858	0.0457417	5.44156e-05	0.0101795	0.0029828	0.0101795	2.90525	1.17066	0.847297
ENSMUSG00000034424	Gcsh	0.00126078	0.0675059	-0.16955	0.0525774	6.65333	0.0146525	0.000977695	0.00418249	0.00287024	0.00418249	2.89936	1.17066	0.88912
ENSMUSG00000021133	Susd6	0.00124301	0.0675059	0.203547	0.0630407	6.07135	0.0185278	0.00181527	0.0056031	0.0037913	0.0056031	2.90553	1.17066	1.15153
ENSMUSG00000042436	Mfap4	0.00127403	0.0678441	0.145976	0.0453093	7.76304	0.0268332	0.00081217	0.00301996	0.00215398	0.00301996	2.89482	1.16849	1.10648
ENSMUSG00000020720	Psmd12	0.00129226	0.0681197	-0.141183	0.0438772	7.72428	0.0120549	0.000480017	0.0031137	0.00216435	0.0031137	2.88865	1.16673	0.906775
ENSMUSG00000022671	Mzt2	0.00128461	0.0681197	-0.216445	0.0672316	5.65799	0.0182577	0.00354533	0.00270414	0.00489216	0.00489216	2.89123	1.16673	0.860684
ENSMUSG00000046447	Camk2n1	0.00128847	0.0681197	0.280297	0.0870882	6.04427	0.0342521	0.00194127	0.0122162	0.00384977	0.0122162	2.88993	1.16673	1.21444
ENSMUSG00000028289	Epha7	0.00130295	0.0683701	0.151076	0.0469861	7.09133	0.00856247	0.00165577	0.00171679	0.00246526	0.00246526	2.88507	1.16513	1.1104
ENSMUSG00000025362	Rps26	0.00130574	0.0683701	-0.116282	0.0361717	9.12618	0.00956245	0.000121843	0.000720152	0.00232049	0.00232049	2.88414	1.16513	0.922562
ENSMUSG00000031340	Gabre	0.00133487	0.0696623	0.412777	0.128656	4.0814	0.11473	0.0130992	0.0123787	0.0177986	0.0177986	2.87456	1.157	1.33125
ENSMUSG00000040767	Snrnp25	0.00135306	0.0703772	-0.307947	0.0960989	5.70939	0.0515101	0.0050979	0.0121408	0.004727	0.0121408	2.86868	1.15257	0.80779
ENSMUSG00000029466	Anapc7	0.0013621	0.0706128	-0.153721	0.0479994	7.0426	0.0076916	0.00180032	-0.000419673	0.00250037	0.00250037	2.86579	1.15112	0.898929
ENSMUSG00000031278	Acsl4	0.0013724	0.0709117	-0.14939	0.0466787	6.62409	0.0152123	0.00116275	0.000539863	0.00290454	0.00290454	2.86252	1.14928	0.901631
ENSMUSG00000022756	Slc7a4	0.0014088	0.0722488	1.26666	0.39672	2.92062	0.637705	0.149218	0.144571	0.0489264	0.144571	2.85115	1.14117	2.40604
ENSMUSG00000022337	Emc2	0.00140405	0.0722488	-0.152761	0.0478303	6.63942	0.0085758	0.00138398	0.00112904	0.00288647	0.00288647	2.85262	1.14117	0.899527
ENSMUSG00000078941	Ak6	0.00141212	0.0722488	-0.124067	0.0388662	7.63582	0.00999756	0.000628468	0.00213706	0.00219128	0.00219128	2.85013	1.14117	0.917597
ENSMUSG00000027087	Itgav	0.00143323	0.0728529	0.198068	0.0621316	6.03288	0.0131725	0.00333111	-0.00173541	0.00387484	0.00387484	2.84368	1.13755	1.14716
ENSMUSG00000027342	Pcna	0.00143214	0.0728529	-0.131924	0.0413803	7.94767	0.0134679	0.000204089	0.00299225	0.00211621	0.00299225	2.84401	1.13755	0.912613
ENSMUSG00000035198	Tubg1	0.00145223	0.0735795	-0.171678	0.0539178	6.81445	0.0152214	0.000749775	0.00467686	0.00269605	0.00467686	2.83797	1.13324	0.88781
ENSMUSG00000025574	Tk1	0.0014582	0.0736438	-0.162387	0.051019	6.47081	0.0139066	0.0017598	0.00185172	0.00309902	0.00309902	2.83618	1.13286	0.893545
ENSMUSG00000020647	Ncoa1	0.0014663	0.0738149	0.275921	0.0867329	5.35934	0.0471553	0.00801645	0.00507784	0.00602573	0.00602573	2.83378	1.13186	1.21077
ENSMUSG00000026614	Slc30a10	0.00149466	0.0738182	0.314428	0.0990099	5.50125	0.044724	0.0055526	0.0127463	0.00544597	0.0127463	2.82546	1.13184	1.24352
ENSMUSG00000022893	Adamts1	0.00148759	0.0738182	0.331136	0.104226	6.44	0.0445544	0.0018059	0.0184718	0.00314174	0.0184718	2.82752	1.13184	1.258
ENSMUSG00000019505	Ubb	0.00147372	0.0738182	-0.149244	0.0469349	9.59937	0.00915913	6.73492e-05	0.0040447	0.00265118	0.0040447	2.83159	1.13184	0.901723
ENSMUSG00000095098	Ccdc85b	0.00147991	0.0738182	-0.176307	0.055467	6.1605	0.0136832	0.0021339	0.00157212	0.00360906	0.00360906	2.82976	1.13184	0.884965
ENSMUSG00000039841	Zfp800	0.00149353	0.0738182	0.281859	0.0887482	5.83884	0.0316882	0.00893205	0.00577028	0.00434986	0.00577028	2.82579	1.13184	1.21576
ENSMUSG00000040354	Mars1	0.00148741	0.0738182	-0.141942	0.0446762	7.1841	0.0148185	0.00132177	0.0018037	0.00240403	0.00240403	2.82757	1.13184	0.906298
ENSMUSG00000032549	Rab6b	0.00150154	0.0738512	0.376034	0.118459	4.79866	0.0564171	0.0107113	0.0154827	0.00945999	0.0154827	2.82346	1.13164	1.29777
ENSMUSG00000028398	Dmac1	0.00150476	0.0738512	-0.174339	0.0549312	6.18571	0.00847316	0.00207236	-0.00160447	0.00356018	0.00356018	2.82253	1.13164	0.886174
ENSMUSG00000065990	Aurkaip1	0.00152321	0.074523	-0.159755	0.0503922	6.34411	0.0105174	0.00145574	0.00252303	0.00328443	0.00328443	2.81724	1.12771	0.895177
ENSMUSG00000009569	Mrtfb	0.00153429	0.0748312	-0.176465	0.0557003	6.33988	0.0132984	0.00250028	0.00221414	0.0032911	0.0032911	2.81409	1.12592	0.884868
ENSMUSG00000079478	Znrd2	0.0015433	0.0750371	-0.24246	0.0765724	5.86462	0.0444993	0.00382071	0.00712417	0.004281	0.00712417	2.81155	1.12472	0.845303
ENSMUSG00000020949	Fkbp3	0.00158183	0.0764356	-0.130166	0.0412018	7.7236	0.0118879	0.00100429	0.000567585	0.00216454	0.00216454	2.80084	1.1167	0.913726
ENSMUSG00000027203	Dut	0.00157751	0.0764356	-0.126286	0.0399636	7.4948	0.0196286	0.00073741	0.00151599	0.00224382	0.00224382	2.80203	1.1167	0.916187
ENSMUSG00000054863	Tafa5	0.0015907	0.0764789	-0.240475	0.0761574	5.36631	0.0239227	0.00483136	0.000696923	0.00599523	0.00599523	2.79841	1.11646	0.846466
ENSMUSG00000093985	Gm10406	0.0015925	0.0764789	-0.218445	0.0691878	5.8942	0.0164341	0.0047313	0.000456027	0.00420433	0.00420433	2.79792	1.11646	0.859491
ENSMUSG00000028837	Psmb2	0.00160322	0.0766516	-0.130395	0.0413253	7.02204	0.0109006	0.000672036	0.0023153	0.00251583	0.00251583	2.79501	1.11548	0.913581
ENSMUSG00000039682	Lap3	0.00160588	0.0766516	-0.238153	0.0754883	6.12962	0.0325084	0.00339755	0.00723962	0.00367047	0.00723962	2.79429	1.11548	0.84783
ENSMUSG00000004945	Tmem242	0.0016151	0.0767412	-0.143949	0.0456521	6.85243	0.0108183	0.00100319	0.00288716	0.00265953	0.00288716	2.7918	1.11497	0.905039
ENSMUSG00000022658	Tagln3	0.00161757	0.0767412	-0.20201	0.0640749	5.78674	0.0131894	0.00316867	-6.79139e-05	0.00449509	0.00449509	2.79114	1.11497	0.869338
ENSMUSG00000046865	Fbl	0.0016451	0.0775773	-0.189723	0.0602717	7.38966	0.0300252	0.000385245	0.00639576	0.002291	0.00639576	2.78381	1.11027	0.876774
ENSMUSG00000021178	Psmc1	0.00164332	0.0775773	-0.130755	0.0415346	7.01809	0.00890319	0.000701389	0.00191879	0.00251884	0.00251884	2.78428	1.11027	0.913353
ENSMUSG00000040771	Oard1	0.0016755	0.0787739	-0.166853	0.0530966	6.338	0.011529	0.00196854	0.00267127	0.00329407	0.00329407	2.77585	1.10362	0.890784
ENSMUSG00000116513	Oard1	0.0016755	0.0787739	-0.166853	0.0530966	6.338	0.011529	0.00196854	0.00267127	0.00329407	0.00329407	2.77585	1.10362	0.890784
ENSMUSG00000102252	Snrpn	0.0016963	0.079513	-0.178733	0.0569428	6.66293	0.0331267	0.00139458	0.00465805	0.00285914	0.00465805	2.7705	1.09956	0.883479
ENSMUSG00000002393	Nr2f6	0.00173471	0.0810522	-0.25545	0.0815549	5.90685	0.0308032	0.00205778	0.0103578	0.00417226	0.0103578	2.76077	1.09124	0.837726
ENSMUSG00000028609	Magoh	0.0017395	0.0810522	-0.133383	0.0425947	6.98299	0.0114195	0.000780142	0.00260657	0.00254629	0.00260657	2.75958	1.09124	0.911691
ENSMUSG00000016554	Eif3d	0.00175435	0.0815019	-0.15612	0.0498955	6.89909	0.0183682	0.000779816	0.00386736	0.00261695	0.00386736	2.75588	1.08883	0.897435
ENSMUSG00000037820	Tgm2	0.00180449	0.0833892	0.4783	0.153269	3.60208	0.111682	0.0165971	0.00217906	0.0272536	0.0272536	2.74365	1.07889	1.3931
ENSMUSG00000027165	B230118H07Rik	0.00180563	0.0833892	-0.238249	0.0763503	5.49525	0.0189332	0.00541264	-0.00039969	0.00546884	0.00546884	2.74337	1.07889	0.847774
ENSMUSG00000017221	Psmd3	0.00181266	0.0834676	-0.135785	0.0435303	8.24524	0.0104839	0.000295123	0.00324199	0.00209469	0.00324199	2.74168	1.07848	0.910174
ENSMUSG00000019054	Fis1	0.00183589	0.0842894	-0.138705	0.0445199	6.90655	0.00818897	0.00108941	0.000821747	0.00261036	0.00261036	2.73615	1.07423	0.908334
ENSMUSG00000052146	Rps10	0.00187804	0.084304	-0.128667	0.0413869	9.35483	0.0115015	0.00016959	0.00302778	0.00245886	0.00302778	2.7263	1.07415	0.914676
ENSMUSG00000027630	Tbl1xr1	0.00187929	0.084304	0.35681	0.114779	4.84269	0.0389504	0.0154862	-0.00893437	0.0091055	0.0091055	2.72601	1.07415	1.28059
ENSMUSG00000071528	Atp5md	0.00187567	0.084304	-0.176623	0.0568059	7.1847	0.0152477	0.000836051	0.0051875	0.00240366	0.0051875	2.72684	1.07415	0.884771
ENSMUSG00000059518	Znhit1	0.00186986	0.084304	-0.189486	0.0609249	5.969	0.0128969	0.002908	0.000957879	0.00402079	0.00402079	2.72819	1.07415	0.876918
ENSMUSG00000020267	Hint1	0.00187777	0.084304	-0.186543	0.0600027	7.64224	0.0219701	0.000472739	0.00624786	0.00218917	0.00624786	2.72636	1.07415	0.878709
ENSMUSG00000047139	Cd24a	0.00184358	0.084304	-0.108961	0.034987	7.78803	0.00607206	0.000137215	0.00197022	0.00214775	0.00214775	2.73434	1.07415	0.927255
ENSMUSG00000031683	Lsm6	0.00187114	0.084304	-0.156623	0.0503617	7.41297	0.0100333	0.00245449	-6.48207e-05	0.00227993	0.00227993	2.72789	1.07415	0.897123
ENSMUSG00000001467	Cyp51	0.00186285	0.084304	-0.199424	0.0640974	5.95364	0.0163101	0.00077532	0.00689385	0.00405732	0.00689385	2.72982	1.07415	0.870898
ENSMUSG00000034345	Gtf2h5	0.00188737	0.0844249	-0.141357	0.0454904	7.25003	0.00794785	0.00149823	0.00194811	0.0023646	0.0023646	2.72414	1.07353	0.906666
ENSMUSG00000017778	Cox7c	0.00189286	0.0844289	-0.147323	0.0474235	7.33198	0.0174617	0.000688597	0.00350952	0.00231987	0.00350952	2.72288	1.07351	0.902924
ENSMUSG00000001525	Tubb5	0.00192445	0.0855943	-0.116415	0.0375331	9.53747	0.00750881	3.181e-05	0.00205967	0.00259783	0.00259783	2.71569	1.06755	0.922477
ENSMUSG00000022132	Cldn10	0.00193858	0.085678	-0.60257	0.19441	3.28147	0.279376	0.0344649	-0.00183596	0.036086	0.036086	2.71252	1.06713	0.65858
ENSMUSG00000079003	Samd1	0.0019466	0.085678	0.253057	0.0816771	6.32825	0.0326868	0.00444106	0.00801175	0.00330961	0.00801175	2.71072	1.06713	1.19173
ENSMUSG00000047793	Sned1	0.00193458	0.085678	0.335374	0.108182	4.86745	0.13606	0.012933	-0.00262153	0.00891325	0.00891325	2.71341	1.06713	1.2617
ENSMUSG00000072235	Tuba1a	0.00194822	0.085678	-0.172721	0.0557523	9.83342	0.0122746	6.63736e-05	0.00573582	0.00288447	0.00573582	2.71036	1.06713	0.887168
ENSMUSG00000037531	Mrpl47	0.00196571	0.0861213	-0.260494	0.0841562	6.18528	0.0204337	0.00965923	-0.00669399	0.003561	0.003561	2.70648	1.06489	0.834802
ENSMUSG00000052539	Magi3	0.0019693	0.0861213	0.159608	0.0515727	6.39268	0.0104177	0.00175467	0.002923	0.00321019	0.00321019	2.70569	1.06489	1.11698
ENSMUSG00000099397	Gm7809	0.00201051	0.0873212	-0.688941	0.223054	3.12583	0.151485	0.0516351	-0.0215795	0.0412371	0.0412371	2.69669	1.05888	0.620309
ENSMUSG00000006057	Atp5g1	0.00201348	0.0873212	-0.162629	0.0526607	8.73426	0.0173925	0.0010146	0.00416194	0.00216412	0.00416194	2.69605	1.05888	0.893396
ENSMUSG00000022754	Tmem45a	0.00200742	0.0873212	0.829225	0.268433	2.81388	0.310077	0.0811968	0.0498669	0.0533083	0.0533083	2.69736	1.05888	1.77673
ENSMUSG00000028234	Rps20	0.00201921	0.0873283	-0.115226	0.0373215	8.18166	0.00948672	0.000504801	0.00143453	0.00209526	0.00209526	2.69482	1.05885	0.923238
ENSMUSG00000033020	Polr2f	0.00203155	0.0876197	-0.182849	0.0592592	6.49512	0.0245158	0.00234257	0.00421251	0.00306627	0.00421251	2.69217	1.0574	0.880962
ENSMUSG00000029993	Nfu1	0.00204088	0.0877802	-0.234567	0.076054	6.00245	0.0189478	0.00685399	-0.0010753	0.0039432	0.0039432	2.69018	1.0566	0.84994
ENSMUSG00000028478	Clta	0.00204751	0.0878242	-0.129495	0.0419995	7.98718	0.0111998	0.000410591	0.00288213	0.00211059	0.00288213	2.68877	1.05639	0.914151
ENSMUSG00000020649	Rrm2	0.00205678	0.0879808	-0.132302	0.0429287	7.56222	0.0222788	0.00019914	0.00324088	0.0022172	0.00324088	2.68681	1.05561	0.912374
ENSMUSG00000090625	Gm20721	0.00208874	0.0884999	0.362262	0.11772	5.08645	0.0498407	0.0184439	-0.00347944	0.00742433	0.00742433	2.68012	1.05306	1.28544
ENSMUSG00000041697	Cox6a1	0.00208126	0.0884999	-0.171834	0.0558195	7.48645	0.0182227	0.000580253	0.00523594	0.00224732	0.00523594	2.68167	1.05306	0.887714
ENSMUSG00000031264	Btk	0.0020769	0.0884999	0.844177	0.274171	3.1623	0.243598	0.100342	-0.0265143	0.0399758	0.0399758	2.68259	1.05306	1.79524
ENSMUSG00000037896	Rcor1	0.00209287	0.0884999	0.117652	0.0382393	7.41684	0.00614979	0.00041121	0.00231831	0.00227813	0.00231831	2.67926	1.05306	1.08497
ENSMUSG00000061477	Rps7	0.00209718	0.0884999	-0.161144	0.0523855	7.27073	0.0155546	0.000362053	0.00476053	0.00235287	0.00476053	2.67836	1.05306	0.894316
ENSMUSG00000023286	Ube2j2	0.00213289	0.089765	0.174543	0.0568344	7.07907	0.0150381	0.0018882	0.00414142	0.0024739	0.00414142	2.67103	1.04689	1.12861
ENSMUSG00000048537	Phldb1	0.00216832	0.0902851	-0.184238	0.0600878	7.18256	0.0118455	0.00433469	-0.000439953	0.00240499	0.00240499	2.66388	1.04438	0.880114
ENSMUSG00000030315	Vgll4	0.00215575	0.0902851	0.138151	0.0450314	6.55232	0.00773552	0.000793052	0.00116171	0.00299223	0.00299223	2.6664	1.04438	1.10049
ENSMUSG00000021694	Ercc8	0.00216509	0.0902851	-0.219165	0.0714684	6.00536	0.0283969	0.00496147	0.00457295	0.00393656	0.00457295	2.66452	1.04438	0.859063
ENSMUSG00000016319	Slc25a5	0.00216077	0.0902851	-0.192356	0.0627139	8.21872	0.0389389	0.000184513	0.00715715	0.00209466	0.00715715	2.66539	1.04438	0.875175
ENSMUSG00000042198	Chchd7	0.00218486	0.0907325	-0.194832	0.06359	5.93712	0.0145507	0.00345095	0.000308923	0.00409728	0.00409728	2.66058	1.04224	0.873674
ENSMUSG00000020430	Pes1	0.00221307	0.0916609	-0.230541	0.0753391	7.64701	0.026785	0.00329748	0.00729767	0.00218762	0.00729767	2.655	1.03782	0.852315
ENSMUSG00000055044	Pdlim1	0.00222155	0.0917694	-0.313548	0.102504	5.84625	0.0546159	0.00496045	0.0146526	0.00432988	0.0146526	2.65334	1.0373	0.80466
ENSMUSG00000059534	Uqcr10	0.00223393	0.0920381	-0.160211	0.0524041	6.38417	0.0159183	0.00172523	0.00340098	0.0032229	0.00340098	2.65093	1.03603	0.894894
ENSMUSG00000062248	Cks2	0.00225661	0.0927283	-0.127106	0.0416167	7.26539	0.0151214	0.000757719	0.00247526	0.00235587	0.00247526	2.64654	1.03279	0.915666
ENSMUSG00000022178	Ajuba	0.00227391	0.0931946	-0.116999	0.0383363	7.59508	0.00595087	0.000538162	0.00189223	0.00220523	0.00220523	2.64323	1.03061	0.922104
ENSMUSG00000002379	Ndufa11	0.00228274	0.0933123	-0.209582	0.0686985	6.16547	0.0209006	0.00201486	0.00679484	0.00359933	0.00679484	2.64154	1.03006	0.864788
ENSMUSG00000070713	Gm10282	0.00229132	0.0934191	-0.122036	0.040017	8.2668	0.00613701	0.000367287	0.00262191	0.00209499	0.00262191	2.63991	1.02956	0.91889
ENSMUSG00000031871	Cdh5	0.00231575	0.09417	0.135416	0.0444507	6.6911	0.00620098	0.000861299	0.000533256	0.00282698	0.00282698	2.63531	1.02609	1.09841
ENSMUSG00000012483	Rpa3	0.00233479	0.0946982	-0.159117	0.0522728	6.34318	0.0162288	0.00181467	0.00204735	0.00328589	0.00328589	2.63175	1.02366	0.895573
ENSMUSG00000041685	Fcho2	0.00234715	0.0947085	0.147682	0.0485416	6.65298	0.0128165	0.00152775	0.00104417	0.00287064	0.00287064	2.62946	1.02361	1.10779
ENSMUSG00000026385	Dbi	0.0023442	0.0947085	-0.141465	0.0464923	6.59809	0.00685144	0.00109916	0.000227696	0.0029357	0.0029357	2.63001	1.02361	0.906598
ENSMUSG00000004698	Hdac9	0.002358	0.0949021	0.371901	0.122296	5.28207	0.0688723	0.0045748	0.0233436	0.00637952	0.0233436	2.62746	1.02272	1.29406
ENSMUSG00000031558	Slit2	0.00237735	0.0951914	0.23532	0.0774453	5.96354	0.0382852	0.00716214	-0.00461243	0.00403371	0.00403371	2.62391	1.0214	1.17717
ENSMUSG00000081087	Rps15a-ps7	0.00237155	0.0951914	0.396323	0.130401	4.51275	0.066882	0.0195669	-0.0113812	0.0121746	0.0121746	2.62497	1.0214	1.31615
ENSMUSG00000018293	Pfn1	0.00238881	0.0954063	-0.150989	0.0497151	8.94316	0.0163044	0.000132735	0.0044809	0.00223551	0.0044809	2.62182	1.02042	0.900633
ENSMUSG00000051495	Irf2bp2	0.00239669	0.0954774	0.268732	0.0885125	7.0236	0.0298548	0.000781052	0.0138433	0.00251464	0.0138433	2.62039	1.0201	1.20475
ENSMUSG00000028140	Mrpl9	0.00241584	0.0957529	-0.148764	0.0490372	6.83367	0.0111824	0.00181132	0.00128701	0.00267735	0.00267735	2.61693	1.01885	0.902023
ENSMUSG00000002274	Metrn	0.00241043	0.0957529	-0.440288	0.1451	6.70436	0.138826	0.0016862	0.0376148	0.00281205	0.0376148	2.61791	1.01885	0.736988
ENSMUSG00000056612	Ppp1r14b	0.00244327	0.0965954	-0.181219	0.0598028	7.754	0.0232298	0.000379016	0.00629688	0.00215632	0.00629688	2.61203	1.01504	0.881957
ENSMUSG00000041840	Haus1	0.00247591	0.0976395	-0.16968	0.056069	6.24847	0.013639	0.00242415	0.00259397	0.00344415	0.00344415	2.60626	1.01037	0.88904
ENSMUSG00000115884	Haus1	0.00247591	0.0976395	-0.16968	0.056069	6.24847	0.013639	0.00242415	0.00259397	0.00344415	0.00344415	2.60626	1.01037	0.88904
ENSMUSG00000027613	Eif6	0.0025031	0.0976471	-0.173657	0.057446	6.07339	0.0221462	0.000882671	0.00527742	0.00378694	0.00527742	2.60152	1.01034	0.886592
ENSMUSG00000093674	Rpl41	0.0025124	0.0976471	-0.203345	0.0672918	9.43392	0.0283424	0.000119784	0.00833283	0.00251577	0.00833283	2.59991	1.01034	0.868534
ENSMUSG00000026511	Srp9	0.00249022	0.0976471	-0.128922	0.0426255	7.11334	0.0139745	0.000941521	0.000768728	0.00245009	0.00245009	2.60376	1.01034	0.914514
ENSMUSG00000020307	Cdc34	0.00251148	0.0976471	-0.166414	0.0550683	6.29036	0.0274031	0.000934439	0.00472627	0.00337181	0.00472627	2.60007	1.01034	0.891055
ENSMUSG00000041949	Tango6	0.00248711	0.0976471	-0.174724	0.0577618	6.0195	0.0202756	0.00232337	0.0020872	0.00390463	0.00390463	2.60431	1.01034	0.885937
ENSMUSG00000003039	Fam32a	0.00251353	0.0976471	-0.117186	0.0387813	7.60095	0.00900703	0.000604285	0.0017781	0.00220316	0.00220316	2.59972	1.01034	0.921984
ENSMUSG00000039831	Arhgap29	0.00255711	0.0979038	0.142806	0.0473417	6.66493	0.00996671	0.0013268	0.00103209	0.00285683	0.00285683	2.59225	1.0092	1.10405
ENSMUSG00000028613	Lrp8	0.00255659	0.0979038	-0.359225	0.119084	5.75036	0.0645758	0.00927237	0.0171989	0.00460165	0.0171989	2.59234	1.0092	0.779583
ENSMUSG00000045394	Epcam	0.00255526	0.0979038	0.143412	0.0475391	6.25201	0.00813701	0.000780729	0.00197592	0.00343788	0.00343788	2.59257	1.0092	1.10451
ENSMUSG00000003154	Foxj2	0.00254802	0.0979038	0.212379	0.0703806	5.95639	0.0341493	0.00347866	0.00576773	0.00405075	0.00576773	2.5938	1.0092	1.1586
ENSMUSG00000066149	Cdc26	0.00255766	0.0979038	-0.134611	0.044626	8.08875	0.00973645	0.00109637	0.00262105	0.00210003	0.00262105	2.59216	1.0092	0.910915
ENSMUSG00000038530	Rgs4	0.00254243	0.0979038	0.285217	0.0944975	4.82744	0.0391571	0.00744251	0.00390231	0.00922641	0.00922641	2.59475	1.0092	1.21859
ENSMUSG00000071708	Sms	0.00257142	0.0981908	-0.130663	0.0433403	7.23135	0.0142415	0.00113086	0.00194825	0.00237545	0.00237545	2.58983	1.00793	0.913412
ENSMUSG00000040675	Mthfd1l	0.00258423	0.0984395	-0.178557	0.0592564	6.86552	0.0310167	0.00102383	0.00553063	0.00264734	0.00553063	2.58767	1.00683	0.883586
ENSMUSG00000027562	Car2	0.00259729	0.098697	0.32038	0.106376	5.94879	0.0488963	0.0013121	0.0198108	0.00406898	0.0198108	2.58548	1.0057	1.24866
ENSMUSG00000034248	Slc25a37	0.00268301	0.101462	0.336835	0.112207	7.41474	0.0492188	0.000820212	0.022682	0.0022791	0.022682	2.57138	0.993696	1.26298
ENSMUSG00000019947	Arid5b	0.0026789	0.101462	0.226787	0.075536	6.55297	0.0339081	0.000790258	0.00986037	0.00299142	0.00986037	2.57204	0.993696	1.17023
ENSMUSG00000020392	Cdkn2aipnl	0.00271201	0.102312	-0.134306	0.0447891	6.65102	0.00749994	0.000871726	0.000203647	0.00287292	0.00287292	2.56671	0.990075	0.911108
ENSMUSG00000078532	Nkain1	0.0027364	0.102983	-0.163007	0.0544101	6.50916	0.010056	0.00247847	4.75605e-05	0.00304772	0.00304772	2.56282	0.987233	0.893162
ENSMUSG00000037169	Mycn	0.00276024	0.103187	-0.193719	0.0647186	7.16896	0.0187146	0.000746055	0.00707247	0.00241355	0.00707247	2.55905	0.986374	0.874349
ENSMUSG00000003531	Dgcr6	0.00276159	0.103187	-0.192212	0.0642185	6.39747	0.0230416	0.00189645	0.00580171	0.00320309	0.00580171	2.55884	0.986374	0.875262
ENSMUSG00000028013	Ppa2	0.00275154	0.103187	-0.159949	0.0534195	6.25016	0.0109552	0.00188564	-0.00126386	0.00344116	0.00344116	2.56042	0.986374	0.895056
ENSMUSG00000111647	Dgcr6	0.00276159	0.103187	-0.192212	0.0642185	6.39747	0.0230416	0.00189645	0.00580171	0.00320309	0.00580171	2.55884	0.986374	0.875262
ENSMUSG00000079396	Gm3411	0.00279582	0.104217	-0.188309	0.0629935	6.50238	0.0268345	0.0026809	0.00472638	0.00305665	0.00472638	2.55349	0.98206	0.877634
ENSMUSG00000002227	Mov10	0.00283313	0.105357	0.155136	0.0519668	7.04082	0.0141364	0.00253934	0.001867	0.00250169	0.00250169	2.54773	0.977335	1.11353
ENSMUSG00000029546	Uncx	0.00289116	0.106755	0.518937	0.174194	4.59834	0.11663	0.00782315	0.0488179	0.0112846	0.0488179	2.53893	0.971613	1.4329
ENSMUSG00000000740	Rpl13	0.00288099	0.106755	-0.113587	0.0381145	9.57671	0.0105327	8.04736e-05	0.00249814	0.00263126	0.00263126	2.54046	0.971613	0.924287
ENSMUSG00000031822	Gse1	0.00288699	0.106755	0.20573	0.0690479	6.47709	0.027067	0.00175551	0.00714402	0.00309049	0.00714402	2.53955	0.971613	1.15327
ENSMUSG00000037373	Ctbp1	0.00289936	0.106806	-0.116938	0.0392645	7.67738	0.00554387	0.000699776	0.000616749	0.00217806	0.00217806	2.5377	0.971405	0.922143
ENSMUSG00000029772	Ahcyl2	0.00291195	0.107018	0.354193	0.118981	4.98597	0.0369476	0.018364	-0.0171574	0.00806144	0.00806144	2.53582	0.970545	1.27827
ENSMUSG00000030557	Mef2a	0.00292789	0.107351	0.137348	0.046164	6.599	0.0151286	0.00104348	0.00273149	0.0029346	0.0029346	2.53344	0.969192	1.09988
ENSMUSG00000063576	Klhdc3	0.00295633	0.107638	-0.127818	0.0430038	7.65852	0.00739944	0.00104744	0.00240464	0.00218393	0.00240464	2.52925	0.968034	0.915215
ENSMUSG00000027495	Fam210b	0.00294293	0.107638	0.178775	0.0601201	5.97158	0.0123463	0.00273221	0.00261444	0.00401472	0.00401472	2.53122	0.968034	1.13192
ENSMUSG00000036199	Ndufa13	0.00295325	0.107638	-0.169461	0.0570085	6.48315	0.0158392	0.00148467	0.00458194	0.0030823	0.00458194	2.5297	0.968034	0.889175
ENSMUSG00000027654	Fam83d	0.00297088	0.107667	-0.140659	0.0473481	6.77614	0.00594996	0.00145011	-0.000637614	0.00273466	0.00273466	2.52711	0.967918	0.907105
ENSMUSG00000004032	Gstm5	0.00296828	0.107667	-0.13172	0.0443353	6.82179	0.00964505	0.000980286	0.00203041	0.00268886	0.00268886	2.5275	0.967918	0.912742
ENSMUSG00000037225	Fgf2	0.00298002	0.107749	0.631342	0.212588	2.94404	0.202173	0.0363609	0.0252999	0.0480005	0.0480005	2.52578	0.967588	1.549
ENSMUSG00000029860	Zyx	0.00300134	0.108048	-0.199688	0.0672892	6.12936	0.0198168	0.00188034	0.00657163	0.003671	0.00657163	2.52268	0.966382	0.870739
ENSMUSG00000033735	Spr	0.00300211	0.108048	-0.151248	0.0509678	6.38623	0.0111054	0.00162926	0.00145267	0.00321981	0.00321981	2.52257	0.966382	0.900471
ENSMUSG00000028840	Zfp593	0.00301469	0.108252	-0.213169	0.0718653	5.53252	0.0317687	0.00402904	0.00561158	0.00532889	0.00561158	2.52076	0.965563	0.86264
ENSMUSG00000005897	Nr2c1	0.00305376	0.109155	-0.179062	0.0604476	5.90028	0.0133227	0.00263176	0.00271231	0.00418887	0.00418887	2.51517	0.961958	0.883277
ENSMUSG00000041453	Rpl21	0.00305246	0.109155	-0.104217	0.0351798	8.58591	0.00711919	0.000181225	0.00099985	0.002129	0.002129	2.51535	0.961958	0.93031
ENSMUSG00000031388	Naa10	0.0030696	0.109471	-0.137642	0.0464899	6.80752	0.0210293	0.00124887	0.00278558	0.0027029	0.00278558	2.51292	0.960702	0.909004
ENSMUSG00000029632	Ndufa4	0.00310077	0.110331	-0.117562	0.0397496	7.11515	0.00787169	0.000500525	0.00146455	0.00244886	0.00244886	2.50853	0.957302	0.921744
ENSMUSG00000034602	Mon2	0.00312635	0.110738	0.208195	0.0704544	6.16321	0.0164056	0.00566204	0.000656696	0.00360376	0.00360376	2.50496	0.955703	1.15524
ENSMUSG00000038725	Pkhd1l1	0.00312183	0.110738	0.82505	0.279159	4.67066	0.29864	0.0530871	0.0923823	0.0105848	0.0923823	2.50559	0.955703	1.7716
ENSMUSG00000037533	Rapgef6	0.00315058	0.111344	0.174817	0.0592068	6.24707	0.0106596	0.00309687	0.000221526	0.00344663	0.00344663	2.50161	0.953333	1.12882
ENSMUSG00000028070	Naxe	0.00317703	0.112026	-0.138888	0.0470795	6.60338	0.00780045	0.00120812	0.00246507	0.00292931	0.00292931	2.49798	0.95068	0.908219
ENSMUSG00000067818	Myl9	0.0031915	0.112283	-0.886601	0.300679	4.4375	0.348038	0.00659489	0.162166	0.0130135	0.162166	2.49601	0.949685	0.540887
ENSMUSG00000074088	Snrnp40	0.00320861	0.1123	-0.112433	0.0381517	7.53778	0.00860431	0.000490494	0.00168057	0.00222653	0.00222653	2.49368	0.949619	0.925027
ENSMUSG00000060636	Rpl35a	0.00320327	0.1123	-0.127248	0.0431713	8.58938	0.0148639	0.000191011	0.003288	0.00212968	0.003288	2.49441	0.949619	0.915576
ENSMUSG00000101452	Gm28530	0.0032135	0.1123	0.898852	0.305053	2.4637	0.248238	0.104044	-0.0591102	0.0696635	0.0696635	2.49302	0.949619	1.86458
ENSMUSG00000106911	Snrnp40	0.00320861	0.1123	-0.112433	0.0381517	7.53778	0.00860431	0.000490494	0.00168057	0.00222653	0.00222653	2.49368	0.949619	0.925027
ENSMUSG00000000399	Ndufa9	0.00324562	0.11317	-0.124545	0.0423124	7.12043	0.0108657	0.000896675	0.00176486	0.00244529	0.00244529	2.4887	0.946268	0.917293
ENSMUSG00000052137	Rbm12b2	0.0032687	0.11347	0.145906	0.0496063	6.60834	0.0228623	0.00167014	0.000923617	0.00292334	0.00292334	2.48562	0.945121	1.10642
ENSMUSG00000028066	Pmf1	0.00326211	0.11347	-0.138598	0.0471118	6.681	0.0154591	0.00130467	0.00201804	0.00283844	0.00283844	2.4865	0.945121	0.908402
ENSMUSG00000003528	Slc25a1	0.00330791	0.114577	-0.183092	0.0623277	5.65609	0.0133186	0.00235312	0.00377269	0.00489841	0.00489841	2.48045	0.940904	0.880813
ENSMUSG00000021024	Psma6	0.00339428	0.116793	-0.12917	0.0440919	7.64072	0.0126695	0.000438794	0.00319019	0.00218967	0.00319019	2.46925	0.932583	0.914357
ENSMUSG00000034098	Fstl5	0.00339281	0.116793	0.815997	0.278525	5.10717	0.282594	0.0174921	0.127317	0.00730215	0.127317	2.46944	0.932583	1.76051
ENSMUSG00000078453	Abracl	0.00337963	0.116793	-0.184245	0.0628626	5.81114	0.0139824	0.00295048	0.00383702	0.00442604	0.00442604	2.47113	0.932583	0.88011
ENSMUSG00000003779	Kif20a	0.00342847	0.117453	-0.121727	0.0415954	8.15605	0.0082211	0.000626209	0.00260345	0.00209611	0.00260345	2.4649	0.930135	0.919087
ENSMUSG00000056367	Actr3b	0.00342284	0.117453	0.382331	0.130624	4.35231	0.0831939	0.0178221	0.0124416	0.014028	0.014028	2.46561	0.930135	1.30345
ENSMUSG00000026209	Dnpep	0.00345692	0.117912	-0.168824	0.0577396	6.38049	0.0147955	0.00299479	0.00126531	0.00322842	0.00322842	2.46131	0.928443	0.889568
ENSMUSG00000025144	Cenpx	0.00345616	0.117912	-0.194855	0.0666408	5.8679	0.013924	0.00401748	0.00129757	0.00427238	0.00427238	2.46141	0.928443	0.873661
ENSMUSG00000031807	Pgls	0.00346849	0.118049	-0.133477	0.0456668	7.00665	0.00757685	0.0013652	-2.85572e-05	0.00252765	0.00252765	2.45986	0.927936	0.911632
ENSMUSG00000027684	Mecom	0.00351	0.118688	0.203131	0.0695859	6.62036	0.0164144	0.0061298	-0.00300381	0.00290897	0.00290897	2.45469	0.925593	1.15119
ENSMUSG00000048772	Tmem53	0.00350857	0.118688	-0.518341	0.177559	3.4221	0.109777	0.0269189	-0.00215696	0.0319317	0.0319317	2.45487	0.925593	0.698174
ENSMUSG00000030002	Dusp11	0.00350639	0.118688	0.208591	0.0714484	5.80036	0.0223255	0.00267114	0.00685795	0.00445633	0.00685795	2.45514	0.925593	1.15556
ENSMUSG00000039952	Dag1	0.00359084	0.120174	-0.118105	0.0405577	7.83178	0.00658487	0.000932833	0.00170921	0.00213769	0.00213769	2.4448	0.92019	0.921397
ENSMUSG00000063727	Tnfrsf11b	0.00357255	0.120174	0.702396	0.241073	2.93256	0.186508	0.0600305	0.0168442	0.0484528	0.0484528	2.44702	0.92019	1.62721
ENSMUSG00000031432	Prps1	0.00359232	0.120174	-0.190894	0.0655563	6.66559	0.0337323	0.00516617	-0.00114134	0.00285608	0.00285608	2.44462	0.92019	0.876063
ENSMUSG00000018858	Mrpl58	0.00358781	0.120174	-0.169362	0.0581542	6.25502	0.0153638	0.00288033	0.000249025	0.00343257	0.00343257	2.44517	0.92019	0.889236
ENSMUSG00000041560	Nop53	0.00357315	0.120174	-0.134886	0.0462958	8.34014	0.017565	0.00100442	0.00299641	0.00209789	0.00299641	2.44695	0.92019	0.910742
ENSMUSG00000030796	Tead2	0.00361226	0.120583	-0.145334	0.04994	7.26472	0.00937107	0.00106394	0.00359153	0.00235625	0.00359153	2.44222	0.918713	0.90417
ENSMUSG00000078812	Eif5a	0.00362944	0.120899	-0.186733	0.0641981	9.53401	0.0361681	0.000126648	0.00756663	0.00259494	0.00756663	2.44016	0.917578	0.878593
ENSMUSG00000115987	Vps28	0.00366488	0.12182	-0.144328	0.0496716	6.64182	0.00881472	0.00172192	0.00282999	0.00288365	0.00288365	2.43594	0.914281	0.9048
ENSMUSG00000025889	Snca	0.00368789	0.122326	0.283571	0.0976588	4.99697	0.0341638	0.00609554	0.0117073	0.007988	0.0117073	2.43322	0.912483	1.2172
ENSMUSG00000051499	Zfp786	0.0036998	0.122461	-0.421183	0.145101	4.59902	0.0656454	0.0280238	-0.00645936	0.0112778	0.0112778	2.43182	0.912002	0.746812
ENSMUSG00000031429	Psmd10	0.00373797	0.123463	-0.170631	0.0588491	6.02699	0.0112814	0.00257678	0.00219731	0.0038879	0.0038879	2.42736	0.908462	0.888454
ENSMUSG00000116430	Psmd10	0.00373797	0.123463	-0.170631	0.0588491	6.02699	0.0112814	0.00257678	0.00219731	0.0038879	0.0038879	2.42736	0.908462	0.888454
ENSMUSG00000042650	Alkbh5	0.00374765	0.123522	0.107926	0.0372333	7.49329	0.0074948	0.000343339	0.0013046	0.00224445	0.00224445	2.42624	0.908254	1.07768
ENSMUSG00000033287	Kctd17	0.00376828	0.123941	-0.150157	0.0518332	6.2936	0.00992822	0.00164875	0.00300366	0.00336638	0.00336638	2.42386	0.906784	0.901152
ENSMUSG00000030653	Gm45837	0.00379272	0.124147	4.09294	1.41384	2.60557	7.66584	3.66871	-1.10532	0.0626579	0.0626579	2.42105	0.906063	17.0646
ENSMUSG00000022214	Dcaf11	0.00379832	0.124147	-0.206814	0.071452	7.17678	0.0174653	0.00712145	-0.00138407	0.00240861	0.00240861	2.42041	0.906063	0.866449
ENSMUSG00000063171	Rps4l	0.00378267	0.124147	-0.216353	0.0747142	6.52337	0.0231727	0.00148495	0.00893518	0.0030292	0.00893518	2.4222	0.906063	0.860739
ENSMUSG00000035351	Nup37	0.00382307	0.124696	-0.149713	0.0517608	6.30332	0.0162899	0.00165093	0.00114257	0.0033502	0.0033502	2.41759	0.904148	0.90143
ENSMUSG00000071655	Ubxn1	0.00384634	0.124902	-0.110206	0.0381271	7.75683	0.0107718	0.000557936	0.00195283	0.00215559	0.00215559	2.41495	0.903431	0.926456
ENSMUSG00000029247	Paics	0.00383963	0.124902	-0.112916	0.0390571	8.03667	0.0131722	0.000253042	0.00259447	0.00210474	0.00259447	2.41571	0.903431	0.924717
ENSMUSG00000075227	Znhit2	0.00385332	0.124902	-0.197004	0.0681692	5.65783	0.0170771	0.00378178	0.00245583	0.00489269	0.00489269	2.41416	0.903431	0.87236
ENSMUSG00000057554	Lgals8	0.00387592	0.125129	0.401949	0.139175	5.51951	0.0751252	0.0215644	0.0145923	0.00537715	0.0145923	2.41162	0.902641	1.32129
ENSMUSG00000031167	Rbm3	0.00388432	0.125129	-0.108535	0.0375891	9.16484	0.0122263	9.24303e-05	0.00254506	0.00234128	0.00254506	2.41069	0.902641	0.927529
ENSMUSG00000022422	Dscc1	0.00387991	0.125129	-0.213004	0.0737608	5.85832	0.0232051	0.00282854	0.00732736	0.00429765	0.00732736	2.41118	0.902641	0.862739
ENSMUSG00000020776	Fbf1	0.00391114	0.125735	-0.18453	0.0639565	6.429	0.0170912	0.00447815	-0.00154518	0.00315732	0.00315732	2.4077	0.900544	0.879936
ENSMUSG00000001497	Pax9	0.00395561	0.126904	0.319707	0.110945	7.54078	0.0725881	0.000733372	0.0222429	0.00222537	0.0222429	2.40279	0.896526	1.24808
ENSMUSG00000013465	Nelfb	0.00396731	0.127019	-0.180818	0.0627675	5.9231	0.0115909	0.00322251	-0.000182736	0.00413172	0.00413172	2.4015	0.896132	0.882203
ENSMUSG00000038855	Itpkb	0.00401681	0.12756	0.157788	0.0548477	7.09414	0.0143922	0.000701461	0.00491398	0.00246331	0.00491398	2.39612	0.894285	1.11558
ENSMUSG00000037287	Tbcel	0.00401172	0.12756	0.152236	0.0529103	6.01628	0.00781001	0.00131385	0.000515578	0.00391188	0.00391188	2.39667	0.894285	1.11129
ENSMUSG00000019303	Psmc3ip	0.00400271	0.12756	-0.164764	0.0572505	6.13282	0.0105069	0.0024542	-0.00140123	0.00366404	0.00366404	2.39765	0.894285	0.892074
ENSMUSG00000037070	Rbmxl1	0.00400709	0.12756	-0.146202	0.0508069	8.40039	0.00943737	0.000222651	0.00459585	0.00210245	0.00459585	2.39717	0.894285	0.903626
ENSMUSG00000041329	Atp1b2	0.00418046	0.132489	0.567371	0.19809	3.24347	0.138199	0.0359585	0.0203204	0.0372886	0.0372886	2.37878	0.877822	1.48182
ENSMUSG00000039542	Ncam1	0.00420418	0.132971	0.232458	0.0812103	6.16115	0.0658865	0.00113443	0.0111765	0.00360778	0.0111765	2.37632	0.876243	1.17483
ENSMUSG00000028961	Pgd	0.00422265	0.13316	-0.125166	0.0437485	6.67229	0.00874444	0.000519258	0.00305341	0.00284838	0.00305341	2.37441	0.875625	0.916899
ENSMUSG00000057572	Zbtb8os	0.00424419	0.13316	-0.200037	0.0699574	5.69236	0.0207161	0.00435467	0.00195461	0.00478087	0.00478087	2.3722	0.875625	0.870528
ENSMUSG00000020528	Prpsap2	0.00423377	0.13316	-0.152679	0.0533805	6.54489	0.00969209	0.00231741	0.00179178	0.00300163	0.00300163	2.37327	0.875625	0.899579
ENSMUSG00000016528	Mapkapk2	0.00424276	0.13316	-0.10842	0.0379153	7.33734	0.00430766	0.000366374	0.000611967	0.0023171	0.0023171	2.37235	0.875625	0.927603
[truncated: 15,387 more rows]

## Sheet: Mandible WT
ens_gene	target_id	pval	qval	b	se_b	mean_obs	var_obs	tech_var	sigma_sq	smooth_sigma_sq	final_sigma_sq	-LOG10 P	-LOG10 Q	Linear FC
[truncated: 15,617 more rows]

[truncated: 9 more sheets: FNP vs Mand WT, Gene Lists, Read Counts, TPM, RNASeq-Design, Joint Down Enrichr sets, Joint Up Enrichr sets, FNP Down Enrichr sets, Mand Down Enrichr Sets]
